# Supplementary material
Source: PubMed Central journal article supplement (PMC3856238)
Supplement: NIHMS523448-supplement-4.pdf [file NIHMS523448-supplement-4.pdf]

## SUPPLEMENTAL MATERIAL

### Transverse aortic constriction (TAC) surgery and echocardiography

All animal experiments were approved by the University of Washington Institutional Animal Care and Use Committee. Thirty five C57Bl6 (Charles River) male mice at 16-20 weeks of age were included in the experiment, including 5 sham, 9 TAC-saline, 6 TAC-SS20, 9 TAC-SS31, and 6 TAC-SS48. TAC surgeries were performed as previously described<sup>1</sup>. Briefly, all mice were anesthetized with an injection of pentobarbital (75mg/kg, ip), then orotracheally intubated and supported with a mechanical ventilator (*TOPO small animal ventilator, Kent Scientific*) and oxygen. The aorta was exposed via a left thoracotomy, at the level of the second intercostal space, and the constriction was placed in the transverse aorta. A 7-0 ligature was secured around the vessel and tied against a 27-gauge blunt needle, causing a transient complete occlusion of the aorta. The needle was then immediately removed to restore the blood flow and the chest closed in layers. Mice were kept on a heating blanket during recovery from the anesthesia. Sham surgery was performed as above without performing the constriction of the aorta. Osmotic minipump (Alzet 1004 4-week pump) with each SS-peptides (3 mg/kg/d of SS20 or SS31, kindly provided by Stealth Peptides Inc.) or saline was inserted subcutaneously on the lateral flank area right after the TAC surgery. M-mode echocardiography was performed at baseline and at the end of experiments (4 weeks after TAC) using Acuson CV70 (13 MHz probe), under isoflurane 0.5% mixed with O<sub>2</sub> to provide adequate sedation but minimal cardiac suppression during echocardiography<sup>2</sup>.

## **Light and Electron Microscopy**

Coronal section of the heart was fixed in 4% paraformaldehyde and stained with Masson trichrome. Fibrotic area was analyzed by the % of blue area. Electron microscopy was performed on a JEOL JEM 1200EXII transmission electron microscope. Quantitative analysis of cristae density and autophagosomes was performed blindly from 8-10 images from different fields per sample (10,000x magnification). Cristae density was quantified by the number of cristae normalized to the perpendicular axis of the mitochondria<sup>3</sup>. Autophagosomes or autolysosomes were identified by the characteristic structure of a double or multi-lamellar smooth membrane completely surrounding compressed mitochondria or membrane bound electron-dense material, and was normalized to the area of 10.000x magnification (250  $\mu\text{m}^2$ )<sup>4</sup>.

## **Quantitative PCR, Western blots and protein carbonyl assay**

The quantitation PCR of collagen 1a2 (Mm 00483937) was performed using Taqman Gene Expression Assays, normalized to 18S RNA. Mitochondrial DNA copy number was quantified using quantitative PCR of total DNA extracts from cardiac tissues. Mitochondrial DNA copies were estimated by the ratio of the amount of mitochondrial gene NADH dehydrogenase 1 (ND1) and a single-copy nuclear gene cytochrome P4501A1 (cyp1A1). Primers used were: ND1 (For: GAACGCAAATCTTAGGGTACATACA, Rev: GCCGTATGGACCAACAATGTT, probe: 6FAM-CTACGAAAAGGCC) and cyp1A1

(For:GACACAGTGATTGGCAGAGATC,  
Rev:AACGGATCTATGGTCTGACCTGT, probe: 6FAM-  
CTCAGCTGCCCTATCTGGAGG CCTTC)

Antibodies used for the Western blots were anti Acadvl (Santa Cruz Biotechnology SC-74898), anti Hk1 (Cell Signaling), anti LC3 (Novus Biologicals) and Donkey anti-rabbit secondary antibody (Thermo Scientific). Cardiac mitochondrial protein carbonyl was measured using OxiSelect protein carbonyl ELISA kit, according to manufacturer`s protocol (Cell Biolabs, San Diego, CA).

### **Sample Preparation and Analysis by Mass Spectrometry**

Five to seven mice from each experimental group were processed for proteomics. Mice were euthanized by cervical dislocation. The heart was removed immediately and rinsed in cold saline, then ventricular tissues were homogenized in cold isolation buffer (250 mM sucrose, 1 mM EGTA, 10 mM HEPES, 10 mM Tris-HCl pH7.4). The lysates were centrifuged at 800 x g for 10 minutes to get rid of the debris. For mass spectrometry, total proteome fractions were suspended with Rapigest (Waters Corporation, Milford, MA) to a final concentration of 0.1% and boiled for 5 min. The samples were then treated with 5 mM DTT at 60 °C for 30 minutes to reduce disulfide bonds. The free sulfhydryls were alkylated with treatment of 15 mM iodoacetamide at room temperature for 30 minutes. Trypsin was added to a final concentration of 1:100 (µg trypsin: µg protein) and the sample digested at 37 °C for 2 hours. The trypsin activity was

halted and Rapigest was hydrolyzed with the addition of HCl to a final concentration of 200 mM and incubation at 37 °C for 30 minutes. The samples were centrifuged for 10 minutes at 20,000 × g and the supernatant was washed using a Waters Oasis MCX sample extraction column, according to manufacturer's protocol (Waters Corporation, Milford, MA). The digested samples were then analyzed by liquid chromatography and mass spectrometry (LC-MS/MS), using a Waters nanoAcquity LC system and a Thermo Scientific LTQ-FT Ultra. The LC mobile phase consisted of buffer A (water, 0.1% formic acid) and buffer B (acetonitrile, 0.1% formic acid). Peptides were loaded onto a 4 cm fused silica trapping column (100 µm inner diameter) at 3 µl/min for 3 minutes in 2% buffer B. Peptides were then separated at a flow rate of 250 nl/min over a homemade 35 cm long, 75 µm inner diameter, fused silica capillary column packed with Jupiter Proteo 90A C-12 resin (Phenomenex). The gradient used was: 2% buffer B to 32% buffer B for 180 minutes, followed by a 10 minute wash with 80% buffer B and a 20 minute re-equilibration at 2% buffer B. Peptides were ionized by electrospray. The scan cycle of the mass spectrometer consisted of one full scan in the ion cyclotron resonance cell (400 – 1,400 m/z, 100,000 resolving power at 400 m/z, profile mode) followed by five data dependent MS/MS scans of the five most intense ions in the ion trap. Dynamic exclusion was used with a repeat count of one and an exclusion time of 30 seconds.

High resolution MS data was processed by Bullseye<sup>5</sup> to assign the accurate precursor ion mass to the low resolution tandem mass spectrometry data. MS/MS spectra were searched by SEQUEST (ver.27) against a mouse IPI

database (3/25/09). The search was done with fully-tryptic specificity, a static mass modification of 57.021 on cysteines and a precursor mass tolerance of  $\pm 10$  ppm. Peptide spectrum match false discovery rates were determined by the Percolator algorithm <sup>6</sup> with a q-value threshold of 0.01. In order to reduce the effect chromatographic drift that may occur during the sample analyses and allowing comparisons of low abundance analytes that may be detected in only one but not the other samples, we developed Topograph, a novel software for chromatographic alignment. The LC-MS/MS chromatograms were aligned by Topograph to enable accurate comparison of peptide peak areas under the curves between samples. Briefly, for two given LC-MS/MS chromatograms, the MS/MS scan number for peptides identified in both samples were plotted against each other in a scatter plot. A LOESS regression was used to find the best fit line through the data points (SFig 1). For peptides that were identified in one sample, Topograph uses the identified peptide's MS/MS scan number and the LOESS regression to identify an approximate time range in the other samples. A matching chromatographic peak was then searched for within that time range. The data is available at

[https://sites.google.com/a/uw.edu/maccoss/home/supplementary\\_data/sstac](https://sites.google.com/a/uw.edu/maccoss/home/supplementary_data/sstac)

## References:

1. Dai DF, Hsieh EJ, Liu Y, Chen T, Beyer RP, Chin MT, MacCoss MJ, Rabinovitch PS. Mitochondrial proteome remodelling in pressure overload-induced heart failure: the role of mitochondrial oxidative stress. *Cardiovasc Res.* 2012;93:79-88.
2. Dai DF, Santana LF, Vermulst M, Tomazela DM, Emond MJ, MacCoss MJ, Gollahon K, Martin GM, Loeb LA, Ladiges WC, Rabinovitch PS. Overexpression of catalase targeted to mitochondria attenuates murine cardiac aging. *Circulation.* 2009;119:2789-2797.
3. Gomes LC, Di Benedetto G, Scorrano L. During autophagy mitochondria elongate, are spared from degradation and sustain cell viability. *Nat Cell Biol.* 2011;13:589-598.
4. Mizushima N, Yoshimori T, Levine B. Methods in mammalian autophagy research. *Cell.* 2010;140:313-326.
5. Hsieh EJ, Hoopmann MR, MacLean B, MacCoss MJ. Comparison of database search strategies for high precursor mass accuracy MS/MS data. *J Proteome Res.* 2010;9:1138-1143.
6. Kall L, Canterbury JD, Weston J, Noble WS, MacCoss MJ. Semi-supervised learning for peptide identification from shotgun proteomics datasets. *Nat Methods.* 2007;4:923-925.

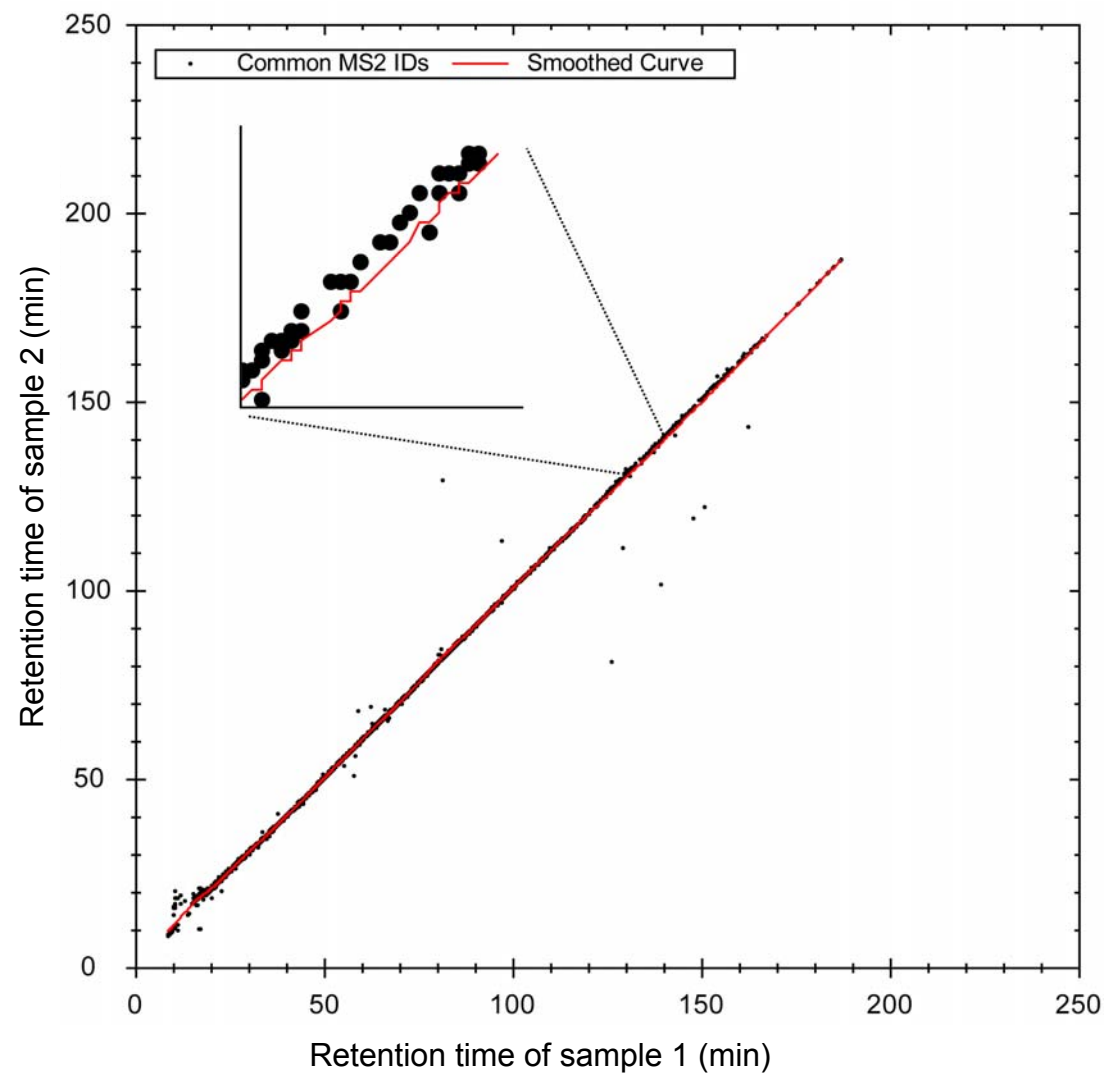

SFig 1. LOESS regression of chromatogram alignment

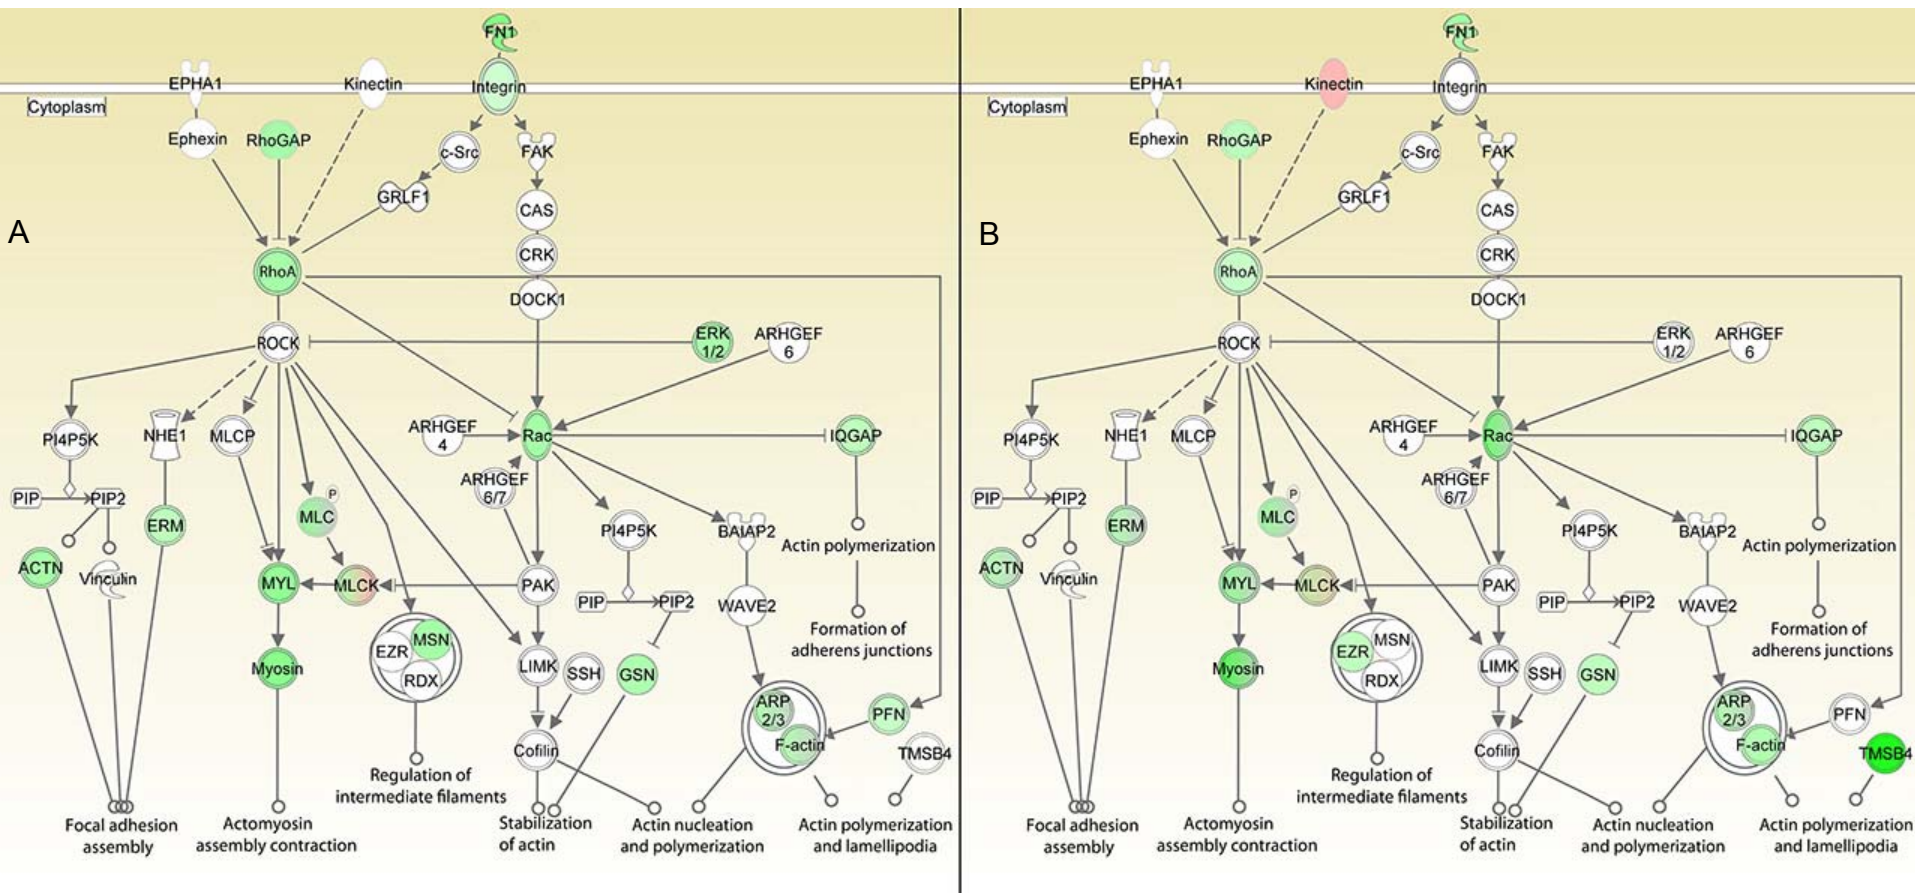

**Figure 2. Network of actin cytoskeleton / RhoA / Rac signaling by Ingenuity Pathway Analysis.**  
 (A) Sham vs. saline-TAC, (B) SS31-TAC vs. saline-TAC. Symbols are colored red when significantly down regulated and green when significantly up-regulated; the intensity of color indicates the magnitude of change.







[illegible]



[illegible]





|                             |        |           |                                                    |           |         |           |            |           |        |            |            |          |         |             |            |
|-----------------------------|--------|-----------|----------------------------------------------------|-----------|---------|-----------|------------|-----------|--------|------------|------------|----------|---------|-------------|------------|
| Signaling                   | 1      | Mup9      | major urinary protein 9                            | -0.649273 | 0.50087 | 0.2271252 | 0.25342359 | -0.627723 | 0.3214 | 0.07264517 | 0.109829   | -1.03835 | 0.44167 | 0.04057334  | 0.12127766 |
|                             | 68016  | Murc      | muscle-related coiled-coil protein                 | 0.775413  | 0.95482 | 0.4267922 | 0.35370357 | 0.47913   | 0.8252 | 0.56629821 | 0.374518   | 1.484936 | 0.07702 | 0.104050893 | 0.13172192 |
|                             | 29811  | Nmyc      | N-myc downstream regulated gene 2                  | 0.972251  | 0.26895 | 0.0047916 | 0.00377783 | 0.821632  | 0.2319 | 0.00513009 | 0.00334568 | 0.567088 | 0.25314 | 0.02676053  | 0.09344003 |
|                             | 230899 | Nppa      | natriuretic peptide type A                         |           |         |           |            |           |        |            |            | 0.501418 | 0.26846 | 0.06337155  | 0.14537626 |
|                             | 380698 | Obscn     | obscurin, cytoskeletal calmodulin and titin-intera | 1.875319  | 1.90995 | 0.3518207 | 0.31880581 | 0.759924  | 1.4133 | 0.59988315 | 0.3871799  | 2.38115  | 1.54699 | 0.15477196  | 0.20588563 |
|                             | 258792 | Olfir1499 | olfactory receptor 1499                            | 1.141488  | 0.52809 | 0.0589206 | 0.12762956 | 1.042425  | 0.4784 | 0.0483076  | 0.0893437  | 0.410568 | 0.46917 | 0.04204765  | 0.29646556 |
|                             | 258319 | Olfir187  | olfactory receptor 187                             | 1.680968  | 0.80485 | 0.066339  | 0.13397364 | 1.420612  | 0.6125 | 0.037284   | 0.0779097  | 1.063446 | 0.73206 | 0.17696233  | 0.21312336 |
|                             | 258780 | Olfir916  | olfactory receptor 916                             | 0.709557  | 0.27874 | 0.0314219 | 0.09114297 | 0.620703  | 0.3266 | 0.08789081 | 0.1220698  | 1.08116  | 0.22321 | 0.6385583   | 0.36873605 |
|                             | 109333 | Pkn2      | protein kinase N2                                  | 0.981538  | 1.57933 | 0.5469622 | 0.04669694 | 2.205589  | 0.9546 | 0.03789967 | 0.087703   | 1.467483 | 1.12189 | 0.2201271   | 0.23452203 |
|                             | 14208  | Ppm1g     | protein phosphatase 1G (formerly 2C), magnes       | -0.899185 | 1.43654 | 0.5468995 | 0.40532253 | 1.336731  | 1.0844 | 0.23950841 | 0.2225194  | 1.073732 | 1.29775 | 0.89615934  | 0.43637576 |
| Transcription / Epigenetics | 72112  | Ppp114d   | protein phosphatase 1, regulatory (inhibitor) sub  | 0.438507  | 0.84619 | 0.6168083 | 0.43337563 | 0.229818  | 0.6678 | 0.73624962 | 0.4316833  | 0.996187 | 0.76125 | 0.21994017  | 0.23452044 |
|                             | 19053  | Ppp2cb    | protein phosphatase 2 (formerly 2A), catalytic su  | -0.16751  | 0.15558 | 0.2905012 | 0.28619587 | 0.030394  | 0.13   | 0.81639084 | 0.4575537  | -0.28834 | 0.13615 | 0.04204812  | 0.12300403 |
|                             | 19087  | Pkr2a     | protein kinase, cAMP dependent regulatory, type    | -0.707697 | 0.81314 | 0.0467379 | 0.34549499 | -0.209325 | 0.1751 | 0.23987662 | 0.222174   | -0.86759 | 0.30142 | 0.0706782   | 0.04199954 |
|                             | 19088  | Pkr2b     | protein kinase, cAMP dependent regulatory, type    | -1.502001 | 0.91629 | 0.1176197 | 0.18052616 | -1.702621 | 0.6936 | 0.00282462 | 0.0543693  | -0.27395 | 0.78965 | 0.0088176   | 0.04686182 |
|                             | 18750  | Prkca     | protein kinase C, alpha                            | 0.996102  | 0.2879  | 0.0071622 | 0.0339526  | 1.122884  | 0.3051 | 0.00267211 | 0.0127104  | 0.232129 | 0.29171 | 0.44193483  | 0.09890008 |
|                             | 19091  | Prkg1     | protein kinase, cGMP-dependent, type I             | 0.644981  | 0.50341 | 0.2321362 | 0.25599639 | 0.845078  | 0.367  | 0.03847308 | 0.078723   | 0.566962 | 0.42921 | 0.21594716  | 0.23310388 |
|                             | 19263  | Ptptrb    | protein tyrosine phosphatase, receptor type, B     | 1.156095  | 0.54011 | 0.0609733 | 0.12980725 | 1.528709  | 0.4284 | 0.00343098 | 0.0156759  | 1.016889 | 0.45955 | 0.05316353  | 0.13370142 |
|                             | 19264  | Ptptrc    | protein tyrosine phosphatase, receptor type, C     | -0.459757 | 0.48571 | 0.3471663 | 0.31684924 | -0.403698 | 0.4054 | 0.32182158 | 0.2654147  | -0.9081  | 0.42278 | 0.03490484  | 0.11260571 |
|                             | 19354  | Rac2      | RAS-related C3 botulinum substrate 2               | -3.219245 | 1.20196 | 0.0148675 | 0.05455809 | -2.711902 | 0.8872 | 0.0409973  | 0.020475   | -2.36501 | 1.15668 | 0.05362618  | 0.13617485 |
|                             | 170758 | Rac3      | RAS-related C3 botulinum substrate 3               | -1.306809 | 0.50678 | 0.0152612 | 0.05554639 | -0.900529 | 0.3973 | 0.02874137 | 0.0698907  | -0.84493 | 1.46315 | 0.07745457  | 0.16131481 |
| Transcription / Epigenetics | 109905 | Rap1a     | RAS-related protein-1a                             | -0.878096 | 0.37547 | 0.0304366 | 0.08917886 | -0.673495 | 0.3154 | 0.04028461 | 0.0810921  | -0.67759 | 0.37566 | 0.0856429   | 0.166624   |



|        |   |         |                                                               |           |         |           |            |           |        |            |           |          |         |            |            |
|--------|---|---------|---------------------------------------------------------------|-----------|---------|-----------|------------|-----------|--------|------------|-----------|----------|---------|------------|------------|
| 11739  | 1 | Slc25a4 | solute carrier family 25 (mitochondrial carrier, ac           | 0.721495  | 0.22841 | 0.0020088 | 0.01246568 | 1.118024  | 0.1766 | 2.18E-09   | 6.30E-06  | 0.7596   | 0.19763 | 0.00018832 | 0.00297693 |
| 20533  | 0 | Slc4a1  | solute carrier family 4 (anion exchanger), memb               | -0.161953 | 0.4373  | 0.7121155 | 0.46898634 | -1.147271 | 0.3599 | 0.00186138 | 0.0097561 | -1.12036 | 0.40773 | 0.0072926  | 0.04202794 |
| 22598  | 0 | Slc6a18 | solute carrier family 6 (neurotransmitter transpo             | 0.965264  | 0.59046 | 0.1365286 | 0.19344549 | 1.184984  | 0.4995 | 0.03379024 | 0.0739105 | 1.002199 | 0.54003 | 0.09315212 | 0.17347224 |
| 21681  | 0 | Thoc4   | Aly/REF export factor                                         | -1.660305 | 0.79055 | 0.0492959 | 0.11646555 | -1.400448 | 0.6727 | 0.04697595 | 0.0885312 | -1.60228 | 0.72877 | 0.03925352 | 0.11932903 |
| 30058  | 1 | Timm8a1 | translocase of inner mitochondrial membrane 8                 | 0.29248   | 0.1422  | 0.0537003 | 0.12181813 | 0.377017  | 0.1399 | 0.01196182 | 0.03763   |          |         |            |            |
| 30056  | 1 | Timm9   | translocase of inner mitochondrial membrane 9 homolog (yeast) |           |         |           |            |           |        |            |           | 1.608464 | 0.64199 | 0.02053604 | 0.08115728 |
| 223696 | 1 | Tomm22  | translocase of outer mitochondrial membrane 22                | 0.987824  | 0.34875 | 0.0196435 | 0.06580227 |           |        |            |           | -0.16256 | 0.29574 | 0.5946083  | 0.35618533 |
| 22041  | 0 | Trf     | transferrin                                                   | -0.234873 | 0.11008 | 0.0333408 | 0.09413029 | -0.069508 | 0.1014 | 0.49323369 | 0.3436671 | 0.068279 | 0.08737 | 0.43482203 | 0.30668468 |
| 434246 | 0 | Trim72  | tripartite motif-containing 72                                | 0.32194   | 0.26972 | 0.2352227 | 0.25777259 | 0.844352  | 0.2022 | 4.98E-05   | 0.0004936 | 0.853804 | 0.226   | 0.00024767 | 0.00364197 |
| 225997 | 0 | Trpm6   | transient receptor potential cation channel, subf             | 3.605189  | 1.12561 | 0.0107814 | 0.04497069 | 2.479254  | 1.2074 | 0.06072412 | 0.1004085 | 2.924614 | 1.04189 | 0.01856928 | 0.07699384 |
| 22227  | 1 | Ucp1    | uncoupling protein 1 (mitochondrial, proton carri             | -1.514956 | 0.6219  | 0.01952   | 0.0655336  | -1.510106 | 0.623  | 0.01866279 | 0.050827  | -1.38363 | 0.55227 | 0.0161004  | 0.07144184 |
| 22229  | 1 | Ucp3    | uncoupling protein 3 (mitochondrial, proton carri             | 1.322255  | 0.66668 | 0.0786348 | 0.14795749 | 1.161255  | 0.4966 | 0.03598786 | 0.0763138 | 0.6661   | 0.61655 | 0.3053475  | 0.26394344 |
| 26949  | 0 | Vat1    | vesicle amine transport protein 1 homolog (T ca               | -1.657553 | 0.47181 | 0.0014726 | 0.00973665 | -0.826683 | 0.3927 | 0.04146582 | 0.081736  | -0.82907 | 0.38016 | 0.03665704 | 0.11560425 |
| 22334  | 1 | Vdac2   | voltage-dependent anion channel 2                             | 0.444988  | 0.17454 | 0.0119573 | 0.04739468 | 0.602152  | 0.1612 | 0.00025131 | 0.0018868 | 0.46399  | 0.15183 | 0.00268023 | 0.02230462 |
| 103573 | 0 | Xpo1    | exportin 1, CRM1 homolog (yeast)                              | 1.86015   | 1.29262 | 0.1839904 | 0.22554072 | 2.195878  | 1.016  | 0.04991303 | 0.0909803 | 1.231046 | 1.27555 | 0.35724901 | 0.27878588 |

## STAB 2. Ingenuity Pathway Analysis and Pathway Molecules

| Canonical Pathways                               | p-value     | Molecules                                                                                                                                                                                                                                                                                                                                                                                                                                                                |
|--------------------------------------------------|-------------|--------------------------------------------------------------------------------------------------------------------------------------------------------------------------------------------------------------------------------------------------------------------------------------------------------------------------------------------------------------------------------------------------------------------------------------------------------------------------|
| <b>Sham - Saline TAC,<br/>1.5 fold, p&lt; 05</b> |             |                                                                                                                                                                                                                                                                                                                                                                                                                                                                          |
| Mitochondrial Dysfunction                        | 3.32853E-16 | ATP5A1, ATP5B, ATP5C1, ATP5J, COX4I1, COX5A (includes EG:12858), COX6A1, COX6B1, CPT1B, CYB5R3, CYC1, GPD2, HSD17B10, MT-CO2, NDUFA10, NDUFA11, NDUFA13, NDUFA8, NDUFAB1, NDUFB10, NDUFB4, NDUFB5, NDUFB7, NDUFB8, NDUFS1, NDUFS2, NDUFS3, NDUFS4, NDUFS5, NDUFS7, NDUFV1, NDUFV2, OGDH, PDHA1, PRDX3, PRDX5, SDHA (includes EG:157074), SDHB, SOD2, TXN2, UQCRCB, UQCRC1, UQCRC2, UQCRFS1                                                                               |
| Oxidative Phosphorylation                        | 3.6251E-16  | ATP5A1, ATP5B, ATP5C1, ATP5D, Atp5h (includes EG:306478), ATP5I, ATP5J, ATP5L, ATP5O, ATP6V1A, ATP6V1B2, ATP8 (includes EG:17706), COX4I1, COX5A (includes EG:12858), COX6A1, COX6B1, CYC1, MT-CO2, NDUFA10, NDUFA11, NDUFA13, NDUFA8, NDUFA9, NDUFAB1, NDUFB10, NDUFB4, NDUFB5, NDUFB7, NDUFB8, NDUFS1, NDUFS2, NDUFS3, NDUFS4, NDUFS5, NDUFS7, NDUFV1, NDUFV2, PPA1, PPA2 (includes EG:27068), SDHA (includes EG:157074), SDHB, UQCRCB, UQCRC1, UQCRC2, UQCRFS1, UQCRQ |
| Citrate Cycle                                    | 1.51297E-14 | ACLY, ACO2 (includes EG:11429), CS, DLD, DLST, FH, IDH1, IDH2, IDH3G, MDH1, MDH2 (includes EG:17448), OGDH, OGDHL, PC, PCK2, SDHA (includes EG:157074), SDHB, SUCLA2, SUCLG1, SUCLG2                                                                                                                                                                                                                                                                                     |
| Valine, Leucine and Isoleucine Degradation       | 1.5772E-14  | ACAA2, ACAD11, ACADL, ACADM, ACADS, ACADSB, ACADVL, ACAT1, ALDH4A1, AUH, BCKDHA, BCKDHB, DBT, ECH1, ECHS1, HADH, HADHA, HADHB, HSD17B10, IVD, MCCC1, MCCC2, MCEE, MUT, OXCT1, PCCA, PCCB                                                                                                                                                                                                                                                                                 |
| Propanoate Metabolism                            | 8.01121E-14 | ACAD11, ACADL, ACADM, ACADS, ACADSB, ACADVL, ACAT1, ACSS1, ALDH4A1, AUH, ECH1, ECHS1, HADHA, HADHB, LDHB, MCEE, MLYCD, MUT, PCCA, PCCB, SUCLA2, SUCLG1, SUCLG2                                                                                                                                                                                                                                                                                                           |
| Ubiquinone Biosynthesis                          | 2.80075E-13 | BCKDHA, BCKDHB, COQ3, NDUFA10, NDUFA11, NDUFA13, NDUFA8, NDUFA9, NDUFAB1, NDUFB10, NDUFB4, NDUFB5, NDUFB7, NDUFB8, NDUFS1, NDUFS2, NDUFS3, NDUFS4, NDUFS5, NDUFS7, NDUFV1, NDUFV2, PRMT1                                                                                                                                                                                                                                                                                 |
| Actin Cytoskeleton Signaling                     | 3.71409E-12 | ACTB, ACTC1, ACTN1, ACTN4, ACTR3, ARPC1B, ARPC2, ARPC4, CFL1, EZR, FN1, GSN, IQGAP1, ITGB1, MAPK1, MSN, MYH10, MYH11, MYH6, MYH7, MYH9, MYL12B, MYL6, MYL9, Myl9, MYLK, MYLK3, PFN1, RAC2, RAC3, RHOA, VCL                                                                                                                                                                                                                                                               |
| Pyruvate Metabolism                              | 3.99217E-12 | ACAT1, ACSS1, AKR7A2, ALDH4A1, BCKDHA, BCKDHB, DLAT, DLD, HADHA, LDHB, MDH1, MDH2 (includes EG:17448), ME1, ME3, PC, PCK2, PDHA1, PDHB, PKM2                                                                                                                                                                                                                                                                                                                             |
| Butanoate Metabolism                             | 5.35737E-12 | ACADS, ACAT1, ALDH4A1, AUH, DBT, ECH1, ECHS1, HADH, HADHA, HADHB, HSD17B10, LIPE, OXCT1, PDHA1, PDHB, SDHA (includes EG:157074), SDHB, SUCLG2                                                                                                                                                                                                                                                                                                                            |
| β-alanine Metabolism                             | 7.25382E-12 | ACAD11, ACADL, ACADM, ACADS, ACADSB, ACADVL, ALDH4A1, AOC3, AUH, DPYSL2, DPYSL3, ECH1, ECHS1, HADHA, HADHB, MLYCD                                                                                                                                                                                                                                                                                                                                                        |
| Regulation of Actin-based Motility by Rho        | 2.08037E-11 | ACTB, ACTC1, ACTR3, ARPC1B, ARPC2, ARPC4, CFL1, GSN, MYL12B, MYL6, Myl9, MYL9, MYLK, PFN1, RAC2, RAC3, RHOA, RHOB, RHOC                                                                                                                                                                                                                                                                                                                                                  |
| Fatty Acid Metabolism                            | 6.75564E-11 | ACAA2, ACAD11, ACADL, ACADM, ACADS, ACADSB, ACADVL, ACAT1, ALDH4A1, AUH, CPT1B, DHRS4, ECH1, ECHS1, ECI1, ECI2, GCDH, HADH, HADHA, HADHB, HSD17B10                                                                                                                                                                                                                                                                                                                       |
| Glycolysis/Gluconeogenesis                       | 7.44094E-11 | ACSS1, ALDH4A1, DHRS4, DLAT, DLD, ENO1, ENO3, HSD17B10, LDHB, PDHA1, PDHB, PFKL, PFKM, PFKP, PGAM1, PGAM2, PGM1, PKM2                                                                                                                                                                                                                                                                                                                                                    |
| RhoA Signaling                                   | 1.72385E-10 | ACTB, ACTC1, ACTR3, ARHGAP1, ARPC1B, ARPC2, ARPC4, CFL1, EZR, MSN, MYL12B, MYL6, Myl9, MYL9, MYLK, MYLK3, PFN1, RHOA, SEPT2                                                                                                                                                                                                                                                                                                                                              |
| Integrin Signaling                               | 2.18063E-10 | ACTB, ACTC1, ACTN1, ACTN4, ACTR3, ARF3, ARPC1B, ARPC2, ARPC4, CAPN2, ITGB1, MAPK1, MYL12B, Myl9, MYL9, MYLK, MYLK3, RAC2, RAC3, RAP1A, RHOA, RHOB, RHOC, TLN1, VCL                                                                                                                                                                                                                                                                                                       |
| RhoGDI Signaling                                 | 3.20701E-10 | ACTB, ACTC1, ACTR3, ARHGAP1, ARHGDI, ARPC1B, ARPC2, ARPC4, CFL1, EZR, GDI2, GNAI2, GNB2,                                                                                                                                                                                                                                                                                                                                                                                 |

|                                                                 |             |                                                                                                                                                                                                                                                     |
|-----------------------------------------------------------------|-------------|-----------------------------------------------------------------------------------------------------------------------------------------------------------------------------------------------------------------------------------------------------|
| Lysine Degradation                                              | 3.31714E-10 | ITGB1, MSN, MYL12B, MYL6, Myl9, MYL9, PRKCA, RHOA, RHOB, RHOC, ACAT1, ALDH4A1, AUH, DBT, DLST, ECH1, ECHS1, GCDH, HADH, HADHA, HADHB, HSD17B10, OGDH, OGDHL                                                                                         |
| Germ Cell-Sertoli Cell Junction Signaling                       | 6.36781E-10 | ACTB, ACTC1, ACTN1, ACTN4, GSN, IQGAP1, ITGB1, JUP, MAPK1, RAC2, RAC3, RHOA, RHOB, RHOC, TUBA1B, TUBA1C, TUBA4A, TUBA8, TUBB, TUBB2A, TUBB2C                                                                                                        |
| Signaling by Rho Family GTPases                                 | 1.15447E-09 | ACTB, ACTC1, ACTR3, ARPC1B, ARPC2, ARPC4, CFL1, EZR, GFAP, GNAI2, GNB2, IQGAP1, ITGB1, MAPK1, MSN, MYL12B, MYL6, Myl9, MYL9, MYLK, RHOA, RHOB, RHOC, SEPT2, VIM                                                                                     |
| ILK Signaling                                                   | 1.24678E-09 | ACTB, ACTC1, ACTN1, ACTN4, CFL1, FLNA, FN1, ITGB1, KRT18, MAPK1, MYH10, MYH11, MYH6, MYH7, MYH9, MYL6, MYL9, RHOA, RHOB, RHOC, RICTOR, VIM                                                                                                          |
| Purine Metabolism                                               | 1.32992E-09 | ACTC1, ADSSL1, AK1, ATIC, ATP5A1, ATP5B, ATP5C1, ATP5D, Atp5h (includes EG:306478), ATP5I, ATP5J, ATP5L, ATP8 (includes EG:17706), BCKDHA, BCKDHB, DCTPP1, GDA, HPRT1, HSP90AA1, HSPA5, MYH6, MYH7, MYH9, NME1 (includes EG:18102), PKM2, PNP, POLK |
| Fatty Acid Elongation in Mitochondria                           | 1.53516E-09 | ACAA2, AUH, ECH1, ECHS1, HADH, HADHA, HADHB, HSD17B10                                                                                                                                                                                               |
| Calcium Signaling                                               | 1.63977E-09 | ACTC1, ATP2A2, ATP2B2, CALR, CAMKK2, CASQ2, MAPK1, MYH10, MYH11, MYH6, MYH7, MYH9, MYL6, MYL9, RAP1A, RYR2, TNNI3, TNNT2, TPM2, TPM3, Tpm4                                                                                                          |
| EIF2 Signaling                                                  | 2.74635E-09 | FAU, MAPK1, PABPC1, RPL13A, RPL18A, RPL23, RPL23A, RPL27A, RPL3, RPL32, RPL4, RPL7, RPLP0, RPLP1, RPS15A, RPS16, RPS3, RPS3A, RPS7, RPS8, RPSA                                                                                                      |
| Tryptophan Metabolism                                           | 5.56851E-09 | ACAT1, ALDH4A1, AOC3, AUH, BCKDHA, BCKDHB, CCBL2, ECH1, ECHS1, GCDH, HADH, HADHA, HADHB, HSD17B10, OGDH, OGDHL, PRMT1                                                                                                                               |
| Protein Kinase A Signaling                                      | 1.76822E-08 | FLNA, GNAI2, GNB2, GYS1, HIST1H1B, HIST1H1C, LIPE, MAPK1, MYH10, MYL12B, MYL6, Myl9, MYL9, MYLK, MYLK3, PDIA3, PRKCA, PYGB, PYGM, RAP1A, RHOA, RYR2, TNNI3, YWHAH, Ywhaq, YWHAZ                                                                     |
| Alanine and Aspartate Metabolism                                | 2.20452E-08 | ADSSL1, CRAT, DLAT, DLD, GOT1, GOT2, PC, PDHA1, PDHB                                                                                                                                                                                                |
| 14-3-3-mediated Signaling                                       | 2.44479E-08 | GFAP, MAPK1, PDIA3, PRKCA, TUBA1B, TUBA1C, TUBA4A, TUBA8, TUBB, TUBB2A, TUBB2C, VIM, YWHAH, Ywhaq, YWHAZ                                                                                                                                            |
| Fcy Receptor-mediated Phagocytosis in Macrophages and Monocytes | 3.12548E-08 | ACTB, ACTC1, ACTR3, ARPC1B, ARPC2, ARPC4, DGKB, EZR, MAPK1, PRKCA, RAC2, RAC3, TLN1                                                                                                                                                                 |
| Tyrosine Metabolism                                             | 8.23742E-08 | AOC3, BCKDHA, BCKDHB, DBT, DHRS4, GOT1, GOT2, HSD17B10, IYD, MIF, PRMT1                                                                                                                                                                             |
| Virus Entry via Endocytic Pathways                              | 9.83927E-08 | ACTB, ACTC1, AP1B1, AP2M1, B2M, CLTC, FLNA, HLA-C, ITGB1, PRKCA, RAC2, RAC3                                                                                                                                                                         |
| Semaphorin Signaling in Neurons                                 | 1.4472E-07  | ARHGAP1, CFL1, DPYSL2, DPYSL3, ITGB1, MAPK1, RHOA, RHOB, RHOC                                                                                                                                                                                       |
| Cdc42 Signaling                                                 | 1.74669E-07 | ACTR3, ARPC1B, ARPC2, ARPC4, B2M, CFL1, HLA-C, HLA-DQB1, IQGAP1, ITGB1, MAPK1, MYL12B, MYL6, Myl9, MYL9, MYLK                                                                                                                                       |
| Axonal Guidance Signaling                                       | 2.35734E-07 | ACTR3, ARPC1B, ARPC2, ARPC4, CFL1, DPYSL2, GNAI2, GNB2, ITGB1, MAPK1, MYL12B, MYL6, Myl9, MYL9, PFN1, PRKCA, RAC2, RAC3, RAP1A, RHOA, TUBA1B, TUBA1C, TUBA4A, TUBA8, TUBB, TUBB2A, TUBB2C                                                           |
| Cellular Effects of Sildenafil (Viagra)                         | 3.07058E-07 | ACTB, ACTC1, MYH10, MYH11, MYH6, MYH7, MYH9, MYL12B, MYL6, Myl9, MYL9, MYLK, PABPC4, PDIA3                                                                                                                                                          |
| Leukocyte Extravasation Signaling                               | 3.35869E-07 | ACTB, ACTC1, ACTN1, ACTN4, ARHGAP1, EZR, GNAI2, ITGB1, MAPK1, MSN, MYL6, PRKCA, RAC2, RAP1A, RHOA, THY1, VCL                                                                                                                                        |
| Arginine and Proline                                            | 3.84821E-07 | ALDH4A1, AOC3, BCKDHA, BCKDHB, CKB, CKM, CKMT2, GOT1, GOT2, P4HB                                                                                                                                                                                    |

|                                                     |             |                                                                                                          |
|-----------------------------------------------------|-------------|----------------------------------------------------------------------------------------------------------|
| Metabolism                                          |             |                                                                                                          |
| Actin Nucleation by ARP-WASP Complex                | 1.8676E-06  | ACTR3, ARPC1B, ARPC2, ARPC4, ITGB1, RHOA, RHOB, RHOC                                                     |
| Pentose Phosphate Pathway                           | 2.256E-06   | PFKL, PFKM, PFKP, PGD, PGM1, TKT                                                                         |
| Glutathione Metabolism                              | 3.83891E-06 | Gsta4, GSTM1, GSTM2, GSTM5, Gstm6, IDH1, IDH2, PGD                                                       |
| AMPK Signaling                                      | 5.96428E-06 | ADIPOQ, AK1, CKM, CPT1B, FASN, GYS1, LIPE, MAPK1, MLYCD, PFKL, PFKM, PFKP                                |
| Phenylalanine Metabolism                            | 9.75905E-06 | AOC3, DBT, GOT1, GOT2, MIF, PRDX5                                                                        |
| Sertoli Cell-Sertoli Cell Junction Signaling        | 1.00723E-05 | ACTB, ACTC1, ACTN1, ACTN4, ITGB1, JUP, MAPK1, TUBA1B, TUBA1C, TUBA4A, TUBA8, TUBB, TUBB2A, TUBB2C        |
| Starch and Sucrose Metabolism                       | 1.00723E-05 | AGL, GANAB, GYS1, PGM1, PYGB, PYGM, UCHL1, UGT1A1                                                        |
| mTOR Signaling                                      | 1.1814E-05  | FAU, MAPK1, PRKCA, RHOA, RHOB, RHOC, RICTOR, RPS15A, RPS16, RPS3, RPS3A, RPS7, RPS8, RPSA                |
| Gap Junction Signaling                              | 1.30165E-05 | ACTB, ACTC1, GNAI2, MAPK1, PDIA3, PRKCA, TUBA1B, TUBA1C, TUBA4A, TUBA8, TUBB, TUBB2A, TUBB2C             |
| Antigen Presentation Pathway                        | 1.43549E-05 | B2M, CALR, CANX, HLA-C, PDIA3, TAPBP                                                                     |
| Phenylalanine, Tyrosine and Tryptophan Biosynthesis | 2.14449E-05 | ENO1, ENO3, GOT1, GOT2                                                                                   |
| Caveolar-mediated Endocytosis Signaling             | 2.29652E-05 | ACTB, ACTC1, B2M, COPA, FLNA, HLA-C, ITGB1, PRKCA                                                        |
| Galactose Metabolism                                | 2.54727E-05 | AKR7A2, GANAB, PFKL, PFKM, PFKP, PGM1                                                                    |
| Ephrin Receptor Signaling                           | 2.92966E-05 | ACTR3, ARPC1B, ARPC2, ARPC4, CFL1, GNAI2, GNB2, ITGB1, MAPK1, RAC2, RAC3, RAP1A, RHOA                    |
| Tight Junction Signaling                            | 4.04271E-05 | ACTB, ACTC1, MYH10, MYH11, MYH6, MYH7, MYH9, MYL6, MYL9, MYLK, RHOA, VCL                                 |
| NRF2-mediated Oxidative Stress Response             | 5.04054E-05 | ACTB, ACTC1, AKR7A2, FTH1 (includes EG:14319), FTL, GSTM1, GSTM2, GSTM5, MAPK1, PPIB, PRKCA, SOD2, STIP1 |

#### SS31 TAC- Saline TAC, 1.5 fold p< 05

|                           |             |                                                                                                                                                                                                                                                                                                                                                                                                                                                                                     |
|---------------------------|-------------|-------------------------------------------------------------------------------------------------------------------------------------------------------------------------------------------------------------------------------------------------------------------------------------------------------------------------------------------------------------------------------------------------------------------------------------------------------------------------------------|
| Oxidative Phosphorylation | 7.82345E-17 | ATP5A1, ATP5B, ATP5C1, ATP5D, ATP5F1, ATP5G2, Atp5h (includes EG:306478), ATP5I, ATP5J, ATP5L, ATP5O, ATP6V1A, ATP6V1B2, COX4I1, COX5A (includes EG:12858), COX6B1, COX6C, COX7A1, Cox8b, CYC1, MT-CO2, MT-ND4, NDUFA10, NDUFA11, NDUFA12, NDUFA13, NDUFA5, NDUFA6, NDUFA9, NDUFAB1, NDUFB10, NDUFB11, NDUFB3, NDUFB4, NDUFB5, NDUFB7, NDUFB8, NDUFB9, NDUFS1, NDUFS2, NDUFS3, NDUFS4, NDUFS6, NDUFS7, NDUFV1, NDUFV2, PPA1, SDHA (includes EG:157074), SDHD, UQCRB, UQCRC1, UQCRC2 |
| Mitochondrial Dysfunction | 1.8676E-16  | ATP5A1, ATP5B, ATP5C1, ATP5J, COX4I1, COX5A (includes EG:12858), COX6B1, COX6C, COX7A1, Cox8b, CPT1B, CYC1, GPD2, HSD17B10, MT-CO2, MT-ND4, NDUFA11, NDUFA12, NDUFA13, NDUFA5, NDUFA6, NDUFA9, NDUFAB1, NDUFB10, NDUFB11, NDUFB3, NDUFB4, NDUFB5, NDUFB7, NDUFB8, NDUFB9, NDUFS1, NDUFS2, NDUFS3, NDUFS4, NDUFS6, NDUFS7, NDUFV1, NDUFV2, PRDX5, SDHA (includes EG:157074), SDHD, SOD2, TXN2, UQCRB, UQCRC1, UQCRC2,                                                                |
| Ubiquinone Biosynthesis   | 1.86586E-14 | BCKDHB, COQ3, MT-ND4, NDUFA10, NDUFA11, NDUFA12, NDUFA13, NDUFA5, NDUFA6, NDUFA9, NDUFAB1, NDUFB10, NDUFB11, NDUFB3, NDUFB4, NDUFB5, NDUFB7, NDUFB8, NDUFB9, NDUFS1, NDUFS2, NDUFS3, NDUFS4, NDUFS6, NDUFS7, NDUFV1, NDUFV2, PRMT5                                                                                                                                                                                                                                                  |

|                                            |             |                                                                                                                                                                                                                       |
|--------------------------------------------|-------------|-----------------------------------------------------------------------------------------------------------------------------------------------------------------------------------------------------------------------|
| Citrate Cycle                              | 2.64981E-13 | ACLY, ACO2 (includes EG:11429), CLYBL, CS, DLD, FH, IDH1, IDH2, IDH3G, MDH1, MDH2 (includes EG:17448), OGDHL, PC, PCK2, SDHA (includes EG:157074), SDHD, SUCLG2                                                       |
| Propanoate Metabolism                      | 5.26178E-13 | ACAD11, ACADL, ACADM, ACADS, ACADSB, ACADVL, ACSS1, Aldh1a7, ALDH4A1, AUH, ECH1, ECHS1, HADHA, HADHB, LDHB, MCEE, MLYCD, MUT, PCCA, PCCB, SUCLG2                                                                      |
| Valine, Leucine and Isoleucine Degradation | 6.29389E-13 | ACAD11, ACADL, ACADM, ACADS, ACADSB, ACADVL, Aldh1a7, ALDH4A1, AUH, BCKDHB, ECH1, ECHS1, HADHA, HADHB, HMGCL, HSD17B10, IVD, MCCC1, MCEE, MUT, PCCA, PCCB                                                             |
| Actin Cytoskeleton Signaling               | 8.47033E-12 | ACTB, ACTG2, ACTN1, ACTN3, ACTN4, ACTR3, ARPC1B, ARPC2, ARPC4, CFL1, EZR, FGF1, FN1, GRB2, GSN, IQGAP1, ITGB1, MSN, MYH10, MYH11, MYH7, Myh7b, MYH9, MYL12B, MYL6, MYL9, MYLK3, PFN1, RAC2, RAC3, RHOA, TMSB10/TMSB4X |
| $\beta$ -alanine Metabolism                | 1.16354E-11 | ACAD11, ACADL, ACADM, ACADS, ACADSB, ACADVL, Aldh1a7, ALDH4A1, AUH, DPYSL3, ECH1, ECHS1, HADHA, HADHB, MLYCD, SRM                                                                                                     |
| Glycolysis/Gluconeogenesis                 | 5.08349E-11 | ACSS1, Aldh1a7, ALDH4A1, DHRS4, DLAT, DLD, ENO1, ENO3, HK2, HSD17B10, LDHB, PDHB, PFKL, PFKM, PFKP, PGAM1, PGAM2, PGM1, PKM2                                                                                          |
| Butanoate Metabolism                       | 5.58395E-11 | ACADS, Aldh1a7, ALDH4A1, ALDH5A1, AUH, ECH1, ECHS1, HADHA, HADHB, HMGCL, HSD17B10, LIPE, PDHB, SDHA (includes EG:157074), SDHD, SUCLG2                                                                                |
| EIF2 Signaling                             | 1.01006E-10 | EIF3C/EIF3CL, GRB2, PABPC1, RPL18A, RPL19, RPL22, RPL23, RPL26, RPL27A, RPL3, RPL30, RPL32, RPLP0, RPLP2, RPS10, RPS15A, RPS16, RPS18, RPS3, RPS3A, RPS4X, RPS6, RPS7, RPS8, RPS9, RPSA                               |
| Pyruvate Metabolism                        | 1.11696E-10 | ACSS1, Aldh1a7, ALDH4A1, BCKDHB, DLAT, DLD, HADHA, LDHB, MDH1, MDH2 (includes EG:17448), ME1, ME3, PC, PCK2, PDHB, PKM2                                                                                               |
| Regulation of Actin-based Motility by Rho  | 2.43102E-10 | ACTB, ACTG2, ACTR3, ARPC1B, ARPC2, ARPC4, CFL1, GSN, MYL12B, MYL6, MYL9, PFN1, RAC2, RAC3, RHOA, RHOC, RHOG                                                                                                           |
| RhoA Signaling                             | 9.08356E-10 | ACTB, ACTG2, ACTR3, ARHGAP1, ARPC1B, ARPC2, ARPC4, CFL1, EZR, KTN1, MSN, MYL12B, MYL6, MYL9, MYLK3, PFN1, RHOA, SEPT2                                                                                                 |
| ILK Signaling                              | 1.24678E-09 | ACTB, ACTG2, ACTN1, ACTN3, ACTN4, CFL1, FLNA, FN1, ITGB1, KRT18, MYH10, MYH11, MYH7, Myh7b, MYH9, MYL6, MYL9, RHOA, RHOC, RHOG, RICTOR, TMSB10/TMSB4X, VIM                                                            |
| Fatty Acid Metabolism                      | 2.29523E-09 | ACAD11, ACADL, ACADM, ACADS, ACADSB, ACADVL, Aldh1a7, ALDH4A1, AUH, CPT1B, DHRS4, ECH1, ECHS1, ECI1, ECI2, HADHA, HADHB, HSD17B10                                                                                     |
| RhoGDI Signaling                           | 4.46107E-09 | ACTB, ACTG2, ACTR3, ARHGAP1, ARHGDIB, ARPC1B, ARPC2, ARPC4, CDH13, CFL1, EZR, GNAI2, ITGB1, MSN, MYL12B, MYL6, MYL9, PRKCA, RHOA, RHOC, RHOG                                                                          |
| Integrin Signaling                         | 6.87998E-09 | ACTB, ACTG2, ACTN1, ACTN3, ACTN4, ACTR3, ARPC1B, ARPC2, ARPC4, GRB2, ITGB1, MYL12B, MYL9, MYLK3, RAC2, RAC3, RAP1A, RAP1B, RHOA, RHOC, RHOG, TLN1                                                                     |
| Purine Metabolism                          | 8.67362E-09 | ADA, ADCY9, ADK, ADSS, AK1, ATP5A1, ATP5B, ATP5C1, ATP5D, ATP5F1, ATP5G2, Atp5h (includes EG:306478), ATP5I, ATP5J, ATP5L, BCKDHB, HPRT1, HSP90AA1, IDE, MYH7, MYH9, NT5C3, PKM2, PNP, POLK, POLR3A                   |
| Calcium Signaling                          | 1.0481E-08  | ATP2A2, ATP2B2, CALR, CASQ2, MYH10, MYH11, MYH7, Myh7b, MYH9, MYL6, MYL9, PRKAR2B, RAP1A, RAP1B, RYR2, TNNC1, TNNI3, TNNT2, TPM3, Tpm4                                                                                |
| Germ Cell-Sertoli Cell Junction Signaling  | 2.96371E-08 | ACTB, ACTG2, ACTN1, ACTN3, ACTN4, GSN, IQGAP1, ITGB1, RAC2, RAC3, RHOA, RHOC, RHOG, TUBA1B, TUBA4A, TUBA8, TUBB, TUBB2A                                                                                               |
| Alanine and Aspartate Metabolism           | 3.80723E-08 | ACY3, ADSS, CRAT, DLAT, DLD, GOT1, GOT2, PC, PDHB                                                                                                                                                                     |
| Signaling by Rho Family GTPases            | 4.83184E-08 | ACTB, ACTG2, ACTR3, ARPC1B, ARPC2, ARPC4, CDH13, CFL1, EZR, GNAI2, IQGAP1, ITGB1, MSN, MYL12B, MYL6, MYL9, RHOA, RHOC, RHOG, SEPT2, STMN1, VIM                                                                        |
| mTOR Signaling                             | 1.5727E-07  | EIF3C/EIF3CL, PRKCA, RHOA, RHOC, RHOG, RICTOR, RPS10, RPS15A, RPS16, RPS18, RPS3, RPS3A, RPS4X, RPS6, RPS7, RPS8, RPS9, RPSA                                                                                          |
| Fatty Acid Elongation in                   | 1.6399E-07  | AUH, ECH1, ECHS1, HADHA, HADHB, HSD17B10                                                                                                                                                                              |

|                                                                 |             |                                                                                                                                                                                           |
|-----------------------------------------------------------------|-------------|-------------------------------------------------------------------------------------------------------------------------------------------------------------------------------------------|
| Mitochondria                                                    |             |                                                                                                                                                                                           |
| Cellular Effects of Sildenafil (Viagra)                         | 1.984E-07   | ACTB, ACTG2, ADCY9, MYH10, MYH11, MYH7, Myh7b, MYH9, MYL12B, MYL6, MYL9, PABPC4, PDIA3, PRKAR2B, PRKG1                                                                                    |
| Pentose Phosphate Pathway                                       | 3.5138E-07  | PFKL, PFKM, PFKP, PGD, PGM1, TALDO1, TKT                                                                                                                                                  |
| Protein Kinase A Signaling                                      | 4.12199E-07 | ADCY9, FLNA, GNAI2, HIST1H1B, HIST1H1C, LIPE, MYH10, MYL12B, MYL6, MYL9, MYLK3, PDIA3, PRKAR2B, PRKCA, PYGB, PYGM, RAP1A, RAP1B, RHOA, RYR2, TNNT3, YWHAH, Ywhaq, YWHAZ                   |
| Actin Nucleation by ARP-WASP Complex                            | 4.96274E-07 | ACTR3, ARPC1B, ARPC2, ARPC4, GRB2, ITGB1, RHOA, RHOC, RHOG                                                                                                                                |
| Leukocyte Extravasation Signaling                               | 1.0027E-06  | ACTB, ACTG2, ACTN1, ACTN3, ACTN4, ARHGAP1, EZR, GNAI2, ITGB1, MSN, MYL6, PRKCA, RAC2, RAP1A, RAP1B, RHOA, THY1                                                                            |
| Lysine Degradation                                              | 1.02824E-06 | Aldh1a7, ALDH4A1, AUH, ECH1, ECHS1, HADHA, HADHB, HSD17B10, OGDHL                                                                                                                         |
| Axonal Guidance Signaling                                       | 1.02824E-06 | ACTR3, ARPC1B, ARPC2, ARPC4, BMP10, CFL1, GNAI2, GRB2, HERC2, ITGB1, MYL12B, MYL6, MYL9, PFN1, PRKAR2B, PRKCA, RAC2, RAC3, RAP1A, RAP1B, RHOA, TUBA1B, TUBA4A, TUBA8, TUBB, TUBB2A, WNT8A |
| Virus Entry via Endocytic Pathways                              | 1.0545E-06  | ACTB, ACTG2, AP2B1, B2M, CLTC, FLNA, HLA-C, ITGB1, PRKCA, RAC2, RAC3                                                                                                                      |
| Fcy Receptor-mediated Phagocytosis in Macrophages and Monocytes | 1.47235E-06 | ACTB, ACTG2, ACTR3, ARPC1B, ARPC2, ARPC4, EZR, PRKCA, RAC2, RAC3, TLN1                                                                                                                    |
| Galactose Metabolism                                            | 3.83891E-06 | GANAB, HK2, LCT, PFKL, PFKM, PFKP, PGM1                                                                                                                                                   |
| 14-3-3-mediated Signaling                                       | 4.43669E-06 | GRB2, PDIA3, PRKCA, TUBA1B, TUBA4A, TUBA8, TUBB, TUBB2A, VIM, YWHAH, Ywhaq, YWHAZ                                                                                                         |
| Arginine and Proline Metabolism                                 | 5.29299E-06 | Aldh1a7, ALDH4A1, BCKDHB, CKM, CKMT2, GOT1, GOT2, P4HB, SRM                                                                                                                               |
| Caveolar-mediated Endocytosis Signaling                         | 6.14638E-06 | ACTB, ACTG2, B2M, COPA, COPB2, FLNA, HLA-C, ITGB1, PRKCA                                                                                                                                  |
| Sertoli Cell-Sertoli Cell Junction Signaling                    | 6.93844E-06 | ACTB, ACTG2, ACTN1, ACTN3, ACTN4, ITGB1, PRKAR2B, PRKG1, PVRL1, SPTBN1, TUBA1B, TUBA4A, TUBA8, TUBB, TUBB2A                                                                               |
| Cdc42 Signaling                                                 | 8.09049E-06 | ACTR3, ARPC1B, ARPC2, ARPC4, B2M, CFL1, HLA-C, HLA-DQA1, HLA-DQB1, IQGAP1, ITGB1, MYL12B, MYL6, MYL9                                                                                      |
| Gap Junction Signaling                                          | 8.09049E-06 | ACTB, ACTG2, ADCY9, GNAI2, GRB2, PDIA3, PRKAR2B, PRKCA, PRKG1, TUBA1B, TUBA4A, TUBA8, TUBB, TUBB2A                                                                                        |
| Tryptophan Metabolism                                           | 1.26013E-05 | Aldh1a7, ALDH4A1, AUH, BCKDHB, CCBL2, ECH1, ECHS1, HADHA, HADHB, HSD17B10, OGDHL, PRMT5                                                                                                   |
| Ephrin Receptor Signaling                                       | 1.87256E-05 | ACTR3, ARPC1B, ARPC2, ARPC4, CFL1, FGF1, GNAI2, GRB2, ITGB1, RAC2, RAC3, RAP1A, RAP1B, RHOA                                                                                               |
| Semaphorin Signaling in Neurons                                 | 1.93679E-05 | ARHGAP1, CFL1, DPYSL3, ITGB1, RHOA, RHOC, RHOG                                                                                                                                            |
| Antigen Presentation Pathway                                    | 2.73111E-05 | B2M, CALR, HLA-C, HLA-DQA1, PDIA3, TAPBP                                                                                                                                                  |
| Phenylalanine, Tyrosine and Tryptophan Biosynthesis             | 3.49911E-05 | ENO1, ENO3, GOT1, GOT2                                                                                                                                                                    |
| Glutathione Metabolism                                          | 8.60198E-05 | Gsta4, GSTM2, GSTM5, Gstm6, IDH1, IDH2, PGD                                                                                                                                               |
| AMPK Signaling                                                  | 0.00010486  | ADIPOQ, AK1, CKM, CPT1B, FASN, LIPE, MLYCD, PFKL, PFKM, PFKP, PRKAR2B                                                                                                                     |

|                                         |            |                                                                                                          |
|-----------------------------------------|------------|----------------------------------------------------------------------------------------------------------|
| Tight Junction Signaling                | 0.00013369 | ACTB, ACTG2, MYH10, MYH11, MYH7, Myh7b, MYH9, MYL6, MYL9, PRKAR2B, PVRL1, RHOA                           |
| NRF2-mediated Oxidative Stress Response | 0.00017886 | ACTB, ACTC1, AKR7A2, FTH1 (includes EG:14319), FTL, GSTM1, GSTM2, GSTM5, MAPK1, PPIB, PRKCA, SOD2, STIP1 |
| Starch and Sucrose Metabolism           | 0.00025214 | AGL, GANAB, HK2, PGM1, PYGB, PYGM, UCHL1                                                                 |
| Tyrosine Metabolism                     | 0.01171531 | BCKDHB, DHRS4, GOT1, GOT2, HSD17B10, PRMT5                                                               |

**SS20 TAC-Saline TAC,  
1.5 fold p< 05**

|                                                     |             |                                                                                                                                                                                              |
|-----------------------------------------------------|-------------|----------------------------------------------------------------------------------------------------------------------------------------------------------------------------------------------|
| Actin Cytoskeleton Signaling                        | 8.84069E-14 | MYH10,MYH6,PFN1,FN1,MYL2,MYL6,FGF2,MYH8,MYLK3,MYH11,TLN1,IQGAP1,ACTR3,FLNA,EZR,ARPC4,MYL4,MYL3,ACTN1,CFL1,ACTB,ACTN2,GSN,TTN (includes EG:22138),MYL7,MyI9,MYL12B,ARPC2,RHOA,MYH3,MYH9,ACTN4 |
| Calcium Signaling                                   | 2.79666E-12 | RAP1B,TPM1 (includes EG:22003),CALR,MYH10,MYH6,MYL6,MYL2,MYH8,TNNT2 (includes EG:21956),RYSR2,PRKAR2A,TNNI3,TPM3,MYH11,ATP2A2,RAP1A,ATP2B2,MYL7,PRKAR2B,MYH3,MYH9,MYL4,CASQ2,MYL3            |
| ILK Signaling                                       | 7.83615E-12 | MYH10,MYH6,FN1,MYL6,CFL1,MYL2,MYH8,ACTB,ACTN2,VIM,MYH11,RICTOR,MYL7,FLNA,FLNC,KRT18,RHOA,MYH3,MYH9,MYL4,ACTN4,MYL3,ACTN1                                                                     |
| RhoA Signaling                                      | 3.52184E-11 | PFN1,MYL2,CFL1,MYL6,ACTB,MYLK3,TTN (includes EG:22138),MYL7,MyI9,ACTR3,MYL12B,EZR,RHOA,ARPC2,ARPC4,MYL4,MYL3                                                                                 |
| Regulation of Actin-based Motility by Rho           | 4.22411E-11 | PFN1,MYL2,CFL1,MYL6,ACTB,GSN,MYL7,MyI9,ACTR3,MYL12B,ARPC2,RHOA,ARPC4,MYL4,MYL3                                                                                                               |
| Protein Kinase A Signaling                          | 6.13913E-11 | RAP1B,MYH10,YWHAH,MYL6,MYL2,GNB2L1,MYLK3,GNB1,FLNA,MYL4,Ywhaq,MYL3,RYSR2,PRKAR2A,TNNI3,PYGB,TTN (includes EG:22138),RAP1A,MYL7,MyI9,PYGM,PRKAR2B,MYL12B,FLNC,RHOA,SFN                        |
| RhoGDI Signaling                                    | 3.27997E-10 | MYL6,MYL2,CFL1,ACTB,GNB2L1,GDI2,ARHGDI2,MYL7,MyI9,GNB1,ACTR3,MYL12B,EZR,ARPC2,RHOA,ARPC4,MYL4,MYL3                                                                                           |
| Cellular Effects of Sildenafil (Viagra)             | 3.51006E-10 | MYH10,MYH6,MYL6,MYL2,MYH8,ACTB,PRKAR2A,MYH11,MYL7,MyI9,PRKAR2B,MYL12B,MYH3,MYH9,MYL4,MYL3                                                                                                    |
| Signaling by Rho Family GTPases                     | 5.20046E-10 | MYL6,CFL1,MYL2,ACTB,GNB2L1,VIM,IQGAP1,CLIP1,MYL7,MyI9,GNB1,STMN1,ACTR3,MYL12B,EZR,ARPC2,RHOA,ARPC4,MYL4,MYL3                                                                                 |
| Cdc42 Signaling                                     | 1.34727E-09 | B2M,MYL2,CFL1,MYL6,HLA-DQB1,IQGAP1,CLIP1,MYL7,MyI9,ACTR3,MYL12B,ARPC2,ARPC4,MYL4,MYL3,HLA-C                                                                                                  |
| Integrin Signaling                                  | 2.78489E-09 | RAP1B,MYL2,ACTN2,ACTB,MYLK3,TLN1,TTN (includes EG:22138),RAP1A,MYL7,MyI9,ACTR3,MYL12B,ARPC2,RHOA,ARPC4,ACTN4,ACTN1                                                                           |
| Tight Junction Signaling                            | 3.07197E-09 | MYH10,MYH6,MYL2,MYL6,MYH8,ACTB,PRKAR2A,MYH11,MYL7,PRKAR2B,RHOA,MYH3,MYH9,MYL4,MYL3                                                                                                           |
| Axonal Guidance Signaling                           | 7.20318E-09 | RAP1B,PFN1,MYL6,CFL1,MYL2,TUBB4B,TUBB2A,GNB2L1,PRKAR2A,TUBB,RAP1A,TUBA1B,MYL7,MyI9,GNB1,PRKAR2B,ACTR3,MYL12B,ARPC2,RHOA,ARPC4,MYL4,MYL3                                                      |
| Hepatic Fibrosis / Hepatic Stellate Cell Activation | 1.59969E-08 | MYH10,MYH6,FN1,MYL2,MYL6,MYH8,FGF2,MYH11,MYL7,MYH3,MYL4,MYH9,MYL3                                                                                                                            |
| Protein Ubiquitination Pathway                      | 1.00374E-07 | PSMB4,B2M,CRYAB,PSMD13,PSME2,HSPA5,UCHL1,HSPA4,HSP90B1,PSME1,HSPA1L,PSMA5,PSMB1,PSMA4,HSP90AA1,HLA-C                                                                                         |
| Germ Cell-Sertoli Cell Junction Signaling           | 1.67467E-07 | PLS1,TUBB4B,ACTN2,ACTB,RHOA,TUBB2A,ACTN4,GSN,TUBB,IQGAP1,TUBA1B,ACTN1                                                                                                                        |
| EIF2 Signaling                                      | 2.07081E-07 | PABPC1,RPL27A,RPL3,RPL26,RPLP0,RPS4X,RPS3A,RPL18A,RPS16,RPL32,RPLP2,RPS3,RPSA                                                                                                                |

|                                                                 |             |                                                                       |
|-----------------------------------------------------------------|-------------|-----------------------------------------------------------------------|
| PAK Signaling                                                   | 1.51135E-06 | MyI9,MYL2,CFL1,MYL6,MYL12B,MYL4,MYL3,MYL7                             |
| Sertoli Cell-Sertoli Cell Junction Signaling                    | 3.05844E-06 | PLS1,PRKAR2B,TUBB4B,ACTN2,ACTB,TUBB2A,PRKAR2A,ACTN4,TUBB,TUBA1B,ACTN1 |
| CXCR4 Signaling                                                 | 3.6251E-06  | MyI9,GNB1,MYL2,MYL6,MYL12B,RHOA,GNB2L1,MYL4,MYL3,MYL7                 |
| Cardiac Hypertrophy Signaling                                   | 6.52921E-06 | MyI9,GNB1,PRKAR2B,MYL2,MYL6,MYL12B,RHOA,GNB2L1,PRKAR2A,MYL4,MYL3,MYL7 |
| Androgen Signaling                                              | 1.00723E-05 | GNB1,HSPA4,CALR,KAT7,PRKAR2B,GNB2L1,PRKAR2A,HSP90AA1                  |
| Phospholipase C Signaling                                       | 1.03967E-05 | MyI9,RAP1B,GNB1,MYL2,MYL6,MYL12B,RHOA,GNB2L1,MYL4,RAP1A,MYL3,MYL7     |
| 14-3-3-mediated Signaling                                       | 1.75101E-05 | YWHAH,TUBB4B,TUBB2A,VIM,Ywhaq,SFN,TUBB,TUBA1B                         |
| Gα12/13 Signaling                                               | 1.75101E-05 | MyI9,MYL2,MYL6,MYL12B,RHOA,MYL4,MYL3,MYL7                             |
| Cell Cycle Control of Chromosomal Replication                   | 2.00346E-05 | MCM5,MCM3,MCM6,MCM2                                                   |
| Ephrin B Signaling                                              | 3.49911E-05 | GNB1,CFL1,RHOA,GNB2L1,CAP1,HNRNPK                                     |
| Pentose Phosphate Pathway                                       | 3.76013E-05 | PGD,TKT,TALDO1,PFKM                                                   |
| Caveolar-mediated Endocytosis Signaling                         | 3.8986E-05  | B2M,FLNA,FLNC,ACTB,COPA,HLA-C                                         |
| Thrombin Signaling                                              | 4.04271E-05 | MyI9,GNB1,MYL2,MYL6,MYL12B,RHOA,GNB2L1,MYL4,MYL3,MYL7                 |
| Breast Cancer Regulation by Stathmin1                           | 4.5114E-05  | GNB1,STMN1,PRKAR2B,TUBB4B,RHOA,GNB2L1,TUBB2A,PRKAR2A,TUBB,TUBA1B      |
| Nitric Oxide Signaling in the Cardiovascular System             | 6.81703E-05 | HSP90B1,PRKAR2B,RYR2,PRKAR2A,HSP90AA1,ATP2A2                          |
| Phenylalanine, Tyrosine and Tryptophan Biosynthesis             | 8.9467E-05  | ENO1,ENO3,GOT1                                                        |
| Ephrin Receptor Signaling                                       | 0.00010075  | RAP1B,GNB1,ACTR3,CFL1,ARPC2,RHOA,GNB2L1,ARPC4,RAP1A                   |
| Antigen Presentation Pathway                                    | 0.00013929  | B2M,CALR,TAPBP,HLA-C                                                  |
| α-Adrenergic Signaling                                          | 0.00015772  | GNB1,PYGM,PRKAR2B,GNB2L1,PRKAR2A,PYGB                                 |
| IL-8 Signaling                                                  | 0.00021205  | MyI9,GNB1,MYL2,MYL12B,RHOA,GNB2L1,IQGAP1,CSTB,MYL7                    |
| Fcγ Receptor-mediated Phagocytosis in Macrophages and Monocytes | 0.00028768  | ACTR3,ARPC2,EZR,ACTB,ARPC4,TLN1                                       |
| Leukocyte Extravasation Signaling                               | 0.00032882  | RAP1B,MYL6,EZR,ACTN2,ACTB,RHOA,ACTN4,RAP1A,ACTN1                      |
| Polyamine Regulation in Colon Cancer                            | 0.00035981  | PSME1,PSME2,PSMA8                                                     |
| eNOS Signaling                                                  | 0.00052024  | HSPA4,HSP90B1,PRKAR2B,HSPA1L,PRKAR2A,HSP90AA1,HSPA5                   |
| Purine Metabolism                                               | 0.00069230  | ADSS,MYH6,POLR3A,ADK,AK1,PNP,MYH9,HSP90AA1,HPRT1,HSPA5,ATIC           |

|                                                            |            |                                                            |
|------------------------------------------------------------|------------|------------------------------------------------------------|
| Rac Signaling                                              | 0.00076289 | ACTR3,CFL1,ARPC2,RHOA,ARPC4,IQGAP1                         |
| Citrate Cycle                                              | 0.00191242 | PC,OGDHL,ACLY                                              |
| Clathrin-mediated<br>Endocytosis Signaling                 | 0.00237404 | ACTR3,APOA4,FGF2,ARPC2,ACTB,ARPC4,RAB7A,SERPINA1           |
| Actin Nucleation by ARP-<br>WASP Complex                   | 0.00280075 | ACTR3,ARPC2,RHOA,ARPC4                                     |
| VEGF Signaling                                             | 0.00350649 | ACTN2,ACTB,ACTN4,SFN,ACTN1                                 |
| B Cell Development                                         | 0.00350649 | PTPRC,IGHM,HLA-DQB1                                        |
| Virus Entry via Endocytic<br>Pathways                      | 0.00496033 | B2M,FLNA,FLNC,ACTB,HLA-C                                   |
| Gap Junction Signaling                                     | 0.00629389 | PRKAR2B,TUBB4B,ACTB,TUBB2A,PRKAR2A,TUBB,TUBA1B             |
| Telomere Extension by<br>Telomerase                        | 0.01099014 | HNRNPA1,HNRNPA2B1                                          |
| AMPK Signaling                                             | 0.01171536 | PRKAR2B,CKM,FASN,AK1,PRKAR2A,PFKM                          |
| Cardiac $\beta$ -adrenergic<br>Signaling                   | 0.01171531 | GNB1,PRKAR2B,RYR2,GNB2L1,PRKAR2A,ATP2A2                    |
| IGF-1 Signaling                                            | 0.01171531 | PRKAR2B,YWHAH,PRKAR2A,Ywhaq,SFN                            |
| Relaxin Signaling                                          | 0.01249346 | RAP1B,GNB1,PRKAR2B,GNB2L1,PRKAR2A,RAP1A                    |
| Starch and Sucrose<br>Metabolism                           | 0.01332885 | UCHL1,PYGM,PYGB,GANAB                                      |
| Alanine and Aspartate<br>Metabolism                        | 0.01422609 | ADSS,PC,GOT1                                               |
| Paxillin Signaling                                         | 0.01622671 | ACTN2,ACTB,TLN1,ACTN4,ACTN1                                |
| Neuroprotective Role of<br>THOP1 in Alzheimer's<br>Disease | 0.01734153 | PRKAR2B,PRKAR2A,HLA-C                                      |
| Netrin Signaling                                           | 0.01734153 | PRKAR2B,RYR2,PRKAR2A                                       |
| Arginine and Proline<br>Metabolism                         | 0.02999967 | AOC3,P4HB,CKM,GOT1                                         |
| Glucocorticoid Receptor<br>Signaling                       | 0.0299996  | HSPA4,HSP90B1,HSPA1L,YWHAH,GTF2F2,ANXA1,HSP90AA1,HSPA5,FGG |
| fMLP Signaling in<br>Neutrophils                           | 0.03457161 | GNB1,ACTR3,ARPC2,GNB2L1,ARPC4                              |
| Cell Cycle: G2/M DNA<br>Damage Checkpoint<br>Regulation    | 0.03714086 | YWHAH,Ywhaq,SFN                                            |
| Regulation of eIF4 and<br>p70S6K Signaling                 | 0.0429333  | PABPC1,RPS4X,RPS3A,RPS16,RPS3,RPSA                         |

---

**STAB 3. Top 15 IPA pathways and component proteins**

| IPA Pathways            | Gene     | Fold change (log2 ratio) |                     |                         |
|-------------------------|----------|--------------------------|---------------------|-------------------------|
|                         |          | SS20-TAC/<br>saline-TAC  | Sham/<br>saline-TAC | SS31-TAC/<br>saline-TAC |
| Mito Dysfunction/OXPHOS | Cox6a1   | -0.641                   | -1.518              | -0.437                  |
|                         | Cyb5r3   | -0.263                   | -1.616              | -0.681                  |
|                         | Atp6v1a  | -0.585                   | -1.065              | -1.222                  |
|                         | Atp6v1b2 | -0.948                   | -1.258              | -1.414                  |
|                         | Gpd2     | -1.534                   | -1.022              | -1.060                  |
|                         | Ppa1     | -1.060                   | -1.143              | -0.880                  |
|                         | Casp3    | -1.140                   | 0.717               | 0.595                   |
|                         | Cat      | 0.202                    | 0.056               | -0.407                  |
|                         | Ndufb11  | 0.604                    | 0.646               | 0.885                   |
|                         | mt-Nd4   | 0.585                    | 0.739               | 0.930                   |
|                         | Ndufs2   | 0.522                    | 0.787               | 0.824                   |
|                         | Uqcrc2   | 0.673                    | 0.787               | 0.860                   |
|                         | Ndufa13  | 0.604                    | 0.829               | 0.901                   |
|                         | Atp5a1   | 0.746                    | 0.771               | 0.910                   |
|                         | Ndufs1   | 0.756                    | 0.731               | 0.842                   |
|                         | mt-Co2   | 0.621                    | 0.642               | 0.810                   |
|                         | Cox5a    | 0.669                    | 0.655               | 0.826                   |
|                         | Cox6c    | 0.671                    | 0.637               | 0.799                   |
|                         | Cox4i1   | 0.792                    | 0.668               | 0.735                   |
|                         | Ndufb9   | 0.772                    | 0.663               | 0.783                   |
|                         | Ndufs6   | 0.754                    | 0.510               | 0.668                   |
|                         | Ndufa12  | 0.877                    | 0.537               | 0.770                   |
|                         | Pdha1    | 0.856                    | 0.810               | 0.594                   |
|                         | Ndufa8   | 0.756                    | 0.799               | 0.571                   |
|                         | Sdha     | 0.729                    | 0.657               | 0.614                   |
|                         | Cox6b1   | 0.625                    | 0.651               | 0.676                   |
|                         | Ndufv1   | 0.658                    | 0.673               | 0.632                   |
|                         | Txn2     | 0.174                    | 0.735               | 0.753                   |
|                         | Prdx5    | 0.298                    | 0.769               | 0.658                   |
|                         | Cyc1     | 0.319                    | 0.700               | 0.687                   |
|                         | Prdx3    | 0.451                    | 0.844               | 0.580                   |
|                         | Ppa2     | 0.224                    | 0.755               | 0.558                   |
|                         | Sdhb     | 0.231                    | 0.704               | 0.584                   |
|                         | mt-Atp8  | 0.296                    | 0.619               | 0.508                   |
|                         | Ogdh     | 0.274                    | 0.678               | 0.533                   |
|                         | Ndufs5   | 0.466                    | 0.627               | 0.373                   |
|                         | Uqcrrs1  | 0.531                    | 0.639               | 0.403                   |
|                         | Ndufa5   | 0.448                    | 0.544               | 0.833                   |
|                         | Atp5f1   | 0.573                    | 0.460               | 0.663                   |
|                         | Uqcrc1   | 0.454                    | 0.593               | 0.698                   |
|                         | Q9D855   | 0.572                    | 0.609               | 0.707                   |
|                         | Atp5g2   | 3.916                    | 0.285               | 3.765                   |
|                         | Cox8b    | 2.068                    | 1.026               | 2.453                   |
|                         | Cox7a1   | 1.109                    | 1.397               | 1.382                   |
|                         | Sdhd     | 1.211                    | 1.470               | 1.536                   |
|                         | Sod2     | 0.425                    | 1.343               | 0.978                   |
|                         | Uqcrcq   | 0.405                    | 1.142               | 0.844                   |

|            |         |        |        |        |
|------------|---------|--------|--------|--------|
|            | Q9CXZ1  | 0.415  | 0.883  | 0.947  |
|            | Atp5g2  | 0.477  | 0.939  | 0.875  |
|            | Cox8b   | 0.525  | 0.882  | 0.928  |
|            | Cox7a1  | 0.490  | 0.866  | 0.903  |
|            | Sdhd    | 0.510  | 0.874  | 0.909  |
|            | Sod2    | 0.797  | 1.013  | 0.954  |
|            | Uqcrq   | 0.784  | 1.012  | 1.030  |
|            | Atp5b   | 0.680  | 0.849  | 0.993  |
|            | Ndufv2  | 0.703  | 0.935  | 1.007  |
|            | Ndufb3  | 0.704  | 0.885  | 0.862  |
|            | Ndufa10 | 0.768  | 0.898  | 0.928  |
|            | Atp5l   | 0.721  | 0.906  | 0.915  |
|            | Ndufb7  | 1.094  | 0.814  | 0.935  |
|            | Atp5d   | 1.210  | 1.209  | 0.785  |
|            | Ndufb4  | 1.130  | 0.980  | 1.202  |
|            | Q9D8B4  | 1.068  | 0.954  | 1.354  |
|            | Ndufs7  | 1.100  | 0.991  | 1.332  |
|            | Ndufb5  | 0.771  | 1.049  | 1.229  |
|            | Ndufa6  | 0.978  | 0.901  | 1.109  |
|            | Cpt1b   | 0.930  | 0.994  | 1.062  |
|            | Atp5o   | 0.949  | 1.024  | 1.151  |
|            | Ndufb10 | 0.798  | 0.822  | 1.155  |
|            | Atp5j   | 0.843  | 0.871  | 0.996  |
|            | Ndufa9  | 0.826  | 0.824  | 1.004  |
| TCA Cycle  | Pc      | -1.833 | -1.435 | -1.367 |
|            | Acly    | -1.899 | -1.468 | -1.774 |
|            | Suc1g1  | 0.091  | 0.915  | 0.025  |
|            | Sdha    | 0.729  | 0.657  | 0.614  |
|            | Mdh2    | 0.579  | 0.782  | 0.629  |
|            | Dlst    | 0.509  | 0.916  | 0.560  |
|            | Clybl   | 0.374  | 0.577  | 0.683  |
|            | Suc1a2  | 0.425  | 0.733  | 0.568  |
|            | Idh1    | 0.316  | 0.775  | 0.586  |
|            | Ogdh    | 0.274  | 0.678  | 0.533  |
|            | Sdhb    | 0.231  | 0.704  | 0.584  |
|            | Idh3g   | 0.400  | 0.864  | 0.708  |
|            | Aco2    | 0.280  | 0.796  | 0.721  |
|            | Dld     | 0.435  | 1.011  | 0.754  |
|            | Suc1g2  | 0.230  | 0.924  | 0.770  |
|            | Cs      | 0.295  | 1.016  | 0.856  |
|            | Mdh1    | 0.327  | 1.031  | 0.739  |
|            | Fh1     | 0.316  | 0.981  | 0.744  |
|            | Pck2    | 0.237  | 1.500  | 1.560  |
|            | Idh2    | 0.753  | 1.466  | 1.063  |
|            | Sdhd    | 1.211  | 1.470  | 1.536  |
| Propanoate | Aldh1a7 | -0.295 | -0.112 | -0.188 |
|            | H2-Ke6  | 0.946  | 0.834  | 0.059  |
|            | Aldh1b1 | 0.947  | -0.187 | 0.184  |
|            | Aldh9a1 | 0.733  | 0.281  | -0.002 |
|            | Acad11  | 1.165  | 1.185  | 1.045  |
|            | Ech1    | 0.800  | 1.891  | 1.413  |

|      |          |        |        |        |
|------|----------|--------|--------|--------|
|      | Mcee     | 0.872  | 1.799  | 1.388  |
|      | Acadm    | 0.570  | 1.484  | 1.008  |
|      | Ivd      | 0.682  | 1.264  | 1.275  |
|      | Hmgcl    | 0.356  | 0.878  | 1.417  |
|      | Acadsb   | -0.496 | 0.950  | 0.932  |
|      | Acat1    | -0.122 | 0.617  | 0.419  |
|      | Mccc2    | 0.287  | 0.917  | 0.236  |
|      | Oxct1    | 0.446  | 0.790  | 0.397  |
|      | Bckdhb   | 0.175  | 1.021  | 0.589  |
|      | Acadl    | 0.336  | 0.759  | 0.665  |
|      | Pccb     | 0.307  | 0.784  | 0.648  |
|      | Pcca     | 0.173  | 0.736  | 0.587  |
|      | Acads    | 0.191  | 0.849  | 0.654  |
|      | Hadhb    | 0.243  | 0.832  | 0.598  |
|      | Bckdha   | 0.627  | 0.797  | 0.680  |
|      | Acadvl   | 0.458  | 0.938  | 0.783  |
|      | Hadha    | 0.555  | 1.102  | 0.752  |
|      | Dbt      | 0.443  | 1.181  | 0.676  |
|      | Echs1    | 0.481  | 1.199  | 0.632  |
|      | Mut      | 0.223  | 1.003  | 0.839  |
|      | Aldh4a1  | 0.368  | 1.068  | 0.766  |
|      | Auh      | 0.339  | 1.087  | 0.912  |
|      | Hsd17b1C | 0.029  | 1.228  | 1.008  |
|      | Hadh     | 0.178  | 1.423  | 0.544  |
|      | Mccc1    | 0.299  | 1.454  | 0.810  |
| BCAA | Aldh1b1  | 0.947  | -0.187 | 0.184  |
|      | Aldh9a1  | 0.733  | 0.281  | -0.002 |
|      | Sdhd     | 1.211  | 1.470  | 1.536  |
|      | Ech1     | 0.800  | 1.891  | 1.413  |
|      | Mcee     | 0.872  | 1.799  | 1.388  |
|      | Acadm    | 0.570  | 1.484  | 1.008  |
|      | Echs1    | 0.481  | 1.199  | 0.632  |
|      | Hadha    | 0.555  | 1.102  | 0.752  |
|      | Acss1    | 0.638  | 1.175  | 0.844  |
|      | Pcca     | 0.173  | 0.736  | 0.587  |
|      | Acads    | 0.191  | 0.849  | 0.654  |
|      | Hadhb    | 0.243  | 0.832  | 0.598  |
|      | Clybl    | 0.374  | 0.577  | 0.683  |
|      | Suc1a2   | 0.425  | 0.733  | 0.568  |
|      | Acadl    | 0.336  | 0.759  | 0.665  |
|      | Pccb     | 0.307  | 0.784  | 0.648  |
|      | Mlycd    | 0.444  | 0.885  | 0.949  |
|      | Ldhb     | 0.456  | 1.103  | 0.987  |
|      | Auh      | 0.339  | 1.087  | 0.912  |
|      | Mut      | 0.223  | 1.003  | 0.839  |
|      | Suc1g2   | 0.230  | 0.924  | 0.770  |
|      | Acadvl   | 0.458  | 0.938  | 0.783  |
|      | Aldh4a1  | 0.368  | 1.068  | 0.766  |
|      | Acadsb   | -0.496 | 0.950  | 0.932  |
|      | Acat1    | -0.122 | 0.617  | 0.419  |
|      | Suc1g1   | 0.091  | 0.915  | 0.025  |

|                           |         |        |        |        |
|---------------------------|---------|--------|--------|--------|
| <b>Ubiquinone</b>         | Prmt1   | -1.075 | -1.179 | -0.659 |
|                           | Coq3    | 1.050  | 1.770  | 1.462  |
|                           | Ndufb4  | 1.130  | 0.980  | 1.202  |
|                           | Ndufa11 | 1.068  | 0.954  | 1.354  |
|                           | Ndufs7  | 1.100  | 0.991  | 1.332  |
|                           | Ndufb7  | 1.094  | 0.814  | 0.935  |
|                           | Ndufa6  | 0.978  | 0.901  | 1.109  |
|                           | Ndufa9  | 0.826  | 0.824  | 1.004  |
|                           | Ndufb10 | 0.798  | 0.822  | 1.155  |
|                           | Prmt5   | 0.590  | 1.002  | 1.125  |
|                           | Ndufb5  | 0.771  | 1.049  | 1.229  |
|                           | Ndufv2  | 0.703  | 0.935  | 1.007  |
|                           | Ndufa10 | 0.768  | 0.898  | 0.928  |
|                           | Ndufb3  | 0.704  | 0.885  | 0.862  |
|                           | Ndufs4  | 0.415  | 0.883  | 0.947  |
|                           | Ndufab1 | 0.477  | 0.939  | 0.875  |
|                           | Ndufb8  | 0.525  | 0.882  | 0.928  |
|                           | Ndufs3  | 0.510  | 0.874  | 0.909  |
|                           | Ndufb11 | 0.604  | 0.646  | 0.885  |
|                           | Ndufs2  | 0.522  | 0.787  | 0.824  |
|                           | mt-Nd4  | 0.585  | 0.739  | 0.930  |
|                           | Ndufa13 | 0.604  | 0.829  | 0.901  |
|                           | Bckdhb  | 0.175  | 1.021  | 0.589  |
|                           | Ndufs6  | 0.754  | 0.510  | 0.668  |
|                           | Ndufa12 | 0.877  | 0.537  | 0.770  |
|                           | Ndufs1  | 0.756  | 0.731  | 0.842  |
|                           | Ndufb9  | 0.772  | 0.663  | 0.783  |
|                           | Ndufv1  | 0.658  | 0.673  | 0.632  |
|                           | Ndufa8  | 0.756  | 0.799  | 0.571  |
|                           | Ndufs5  | 0.466  | 0.627  | 0.373  |
|                           | Ndufa5  | 0.448  | 0.544  | 0.833  |
| <b>Actin Cytoskeleton</b> | Tmsb4x  | -2.944 | -0.071 | -4.330 |
|                           | Rac2    | -2.365 | -3.219 | -2.712 |
|                           | FN1     | -2.202 | -2.536 | -1.709 |
|                           | Myl12a  | -1.781 | -2.217 | -1.996 |
|                           | Fgf2    | 4.343  | -0.365 | -1.957 |
|                           | Grb2    | -0.780 | -0.606 | -1.517 |
|                           | Vcl     | -0.420 | -0.602 | -0.503 |
|                           | Itgb1   | -0.571 | -1.018 | -0.716 |
|                           | Ezr     | -0.895 | -0.683 | -0.716 |
|                           | Cfl1    | -0.806 | -0.906 | -0.809 |
|                           | Actr3   | -0.695 | -0.748 | -0.741 |
|                           | Myl6    | -0.486 | -2.088 | -1.119 |
|                           | Rac3    | -0.923 | -2.308 | -0.583 |
|                           | Myl9    | -1.186 | -2.090 | -0.962 |
|                           | Pfn1    | -0.979 | -1.172 | -0.893 |
|                           | Actc1   | -0.796 | -1.389 | -0.905 |
|                           | Arpc1b  | -0.727 | -1.238 | -0.955 |
|                           | Msn     | -0.595 | -1.542 | -1.120 |
|                           | Gsn     | -0.989 | -1.694 | -1.191 |
|                           | Mylk    | -1.118 | -1.664 | -1.109 |

|           |         |        |        |        |
|-----------|---------|--------|--------|--------|
|           | Actn4   | -1.107 | -1.471 | -1.160 |
|           | Rhoa    | -0.957 | -1.453 | -1.034 |
|           | Arpc2   | -1.549 | -1.327 | -1.315 |
|           | Myh10   | -1.254 | -1.633 | -1.898 |
|           | Myl12b  | -1.372 | -1.696 | -1.243 |
|           | Mapk1   | -1.222 | -1.857 | -1.389 |
|           | Actn1   | -1.119 | -1.840 | -1.484 |
|           | Arpc4   | -0.894 | -1.681 | -1.526 |
|           | Myh9    | -1.167 | -1.410 | -1.469 |
|           | Myh11   | -0.961 | -1.576 | -1.374 |
|           | Iqgap1  | -0.897 | -1.410 | -1.356 |
|           | Fgf1    | 0.512  | 0.903  | 0.780  |
|           | Mylk3   | 0.585  | 0.864  | 0.643  |
|           | Myh3    | 1.083  | 0.593  | -0.119 |
|           | Myh6    | 1.034  | 0.725  | 0.109  |
|           | Actn3   | 0.259  | 0.255  | -0.174 |
|           | Myh13   | 0.581  | 0.214  | -0.116 |
|           | Myl3    | 0.623  | 0.018  | -0.040 |
|           | Ttn     | 0.621  | 0.131  | -0.371 |
|           | Actn2   | 0.808  | 0.304  | -0.180 |
|           | Myl4    | 2.124  | -0.790 | -0.420 |
|           | Myl7    | 1.332  | -0.668 | -0.208 |
|           | Acta2   | 0.266  | -0.804 | 0.244  |
|           | Myh7b   | 0.584  | -0.418 | -1.245 |
|           | Myh7    | 0.226  | -1.651 | -0.948 |
| Pyruvate  | Me1     | -0.898 | -0.894 | -0.692 |
|           | Pc      | -1.833 | -1.435 | -1.367 |
|           | Pck2    | 0.237  | 1.500  | 1.560  |
|           | Pkm     | 0.941  | 1.604  | 1.518  |
|           | Me3     | 0.614  | 1.443  | 1.216  |
|           | Pdha1   | 0.856  | 0.810  | 0.594  |
|           | Mdh2    | 0.579  | 0.782  | 0.629  |
|           | Bckdha  | 0.627  | 0.797  | 0.680  |
|           | Dlat    | 0.432  | 0.739  | 0.649  |
|           | Pdhb    | 0.387  | 0.734  | 0.738  |
|           | Ldhb    | 0.456  | 1.103  | 0.987  |
|           | Hadha   | 0.555  | 1.102  | 0.752  |
|           | Acss1   | 0.638  | 1.175  | 0.844  |
|           | Bckdhb  | 0.175  | 1.021  | 0.589  |
|           | Dld     | 0.435  | 1.011  | 0.754  |
|           | Mdh1    | 0.327  | 1.031  | 0.739  |
|           | Aldh4a1 | 0.368  | 1.068  | 0.766  |
|           | Aldh1b1 | 0.947  | -0.187 | 0.184  |
|           | Aldh9a1 | 0.733  | 0.281  | -0.002 |
|           | Aldh1a7 | -0.295 | -0.112 | -0.188 |
| Butanoate | Akr7a5  | -0.162 | 0.675  | 0.347  |
|           | Glo1    | -0.245 | 0.229  | 0.591  |
|           | Lipe    | -2.865 | -1.986 | -2.544 |
|           | Aldh1b1 | 0.947  | -0.187 | 0.184  |
|           | Aldh9a1 | 0.733  | 0.281  | -0.002 |
|           | Aldh1a7 | -0.295 | -0.112 | -0.188 |

|                              |          |        |        |        |
|------------------------------|----------|--------|--------|--------|
|                              | Acat1    | -0.122 | 0.617  | 0.419  |
|                              | Glo1     | -0.245 | 0.229  | 0.591  |
|                              | Ech1     | 0.800  | 1.891  | 1.413  |
|                              | Sdhd     | 1.211  | 1.470  | 1.536  |
|                              | Hmgcl    | 0.356  | 0.878  | 1.417  |
|                              | Hadha    | 0.555  | 1.102  | 0.752  |
|                              | Dbt      | 0.443  | 1.181  | 0.676  |
|                              | Echs1    | 0.481  | 1.199  | 0.632  |
|                              | Suc1g2   | 0.230  | 0.924  | 0.770  |
|                              | Aldh4a1  | 0.368  | 1.068  | 0.766  |
|                              | Auh      | 0.339  | 1.087  | 0.912  |
|                              | Hsd17b1C | 0.029  | 1.228  | 1.008  |
|                              | Hadh     | 0.178  | 1.423  | 0.544  |
|                              | Pdha1    | 0.856  | 0.810  | 0.594  |
|                              | Sdha     | 0.729  | 0.657  | 0.614  |
|                              | Oxct1    | 0.446  | 0.790  | 0.397  |
|                              | Hadhb    | 0.243  | 0.832  | 0.598  |
|                              | Sdhb     | 0.231  | 0.704  | 0.584  |
|                              | Aldh5a1  | 0.271  | 0.557  | 0.691  |
|                              | Pdha1    | 0.387  | 0.734  | 0.738  |
| beta-alanine                 | Aoc3     | -1.954 | -2.244 | -1.137 |
|                              | Srm      | -0.538 | -1.678 | -1.780 |
|                              | Dpysl2   | -0.670 | -1.087 | -0.594 |
|                              | Dpysl3   | -0.095 | -1.278 | -0.725 |
|                              | Aldh1b1  | 0.947  | -0.187 | 0.184  |
|                              | Aldh9a1  | 0.733  | 0.281  | -0.002 |
|                              | Acad11   | 1.165  | 1.185  | 1.045  |
|                              | Ech1     | 0.800  | 1.891  | 1.413  |
|                              | Acadm    | 0.570  | 1.484  | 1.008  |
|                              | Acadsb   | -0.496 | 0.950  | 0.932  |
|                              | Echs1    | 0.481  | 1.199  | 0.632  |
|                              | Hadha    | 0.555  | 1.102  | 0.752  |
|                              | Acadl    | 0.336  | 0.759  | 0.665  |
|                              | Acads    | 0.191  | 0.849  | 0.654  |
|                              | Hadhb    | 0.243  | 0.832  | 0.598  |
|                              | Aldh4a1  | 0.368  | 1.068  | 0.766  |
|                              | Auh      | 0.339  | 1.087  | 0.912  |
|                              | Acadvl   | 0.458  | 0.938  | 0.783  |
|                              | Mlycd    | 0.444  | 0.885  | 0.949  |
| Rho regulation of Actin Moti | Myl4     | 2.124  | -0.790 | -0.420 |
|                              | Myl7     | 1.332  | -0.668 | -0.208 |
|                              | Myl3     | 0.623  | 0.018  | -0.040 |
|                              | Acta2    | 0.266  | -0.804 | 0.244  |
|                              | Rhoc     | -0.157 | -1.193 | -0.369 |
|                              | Rac2     | -2.365 | -3.219 | -2.712 |
|                              | Myl12a   | -1.781 | -2.217 | -1.996 |
|                              | Myl6     | -0.486 | -2.088 | -1.119 |
|                              | Rac3     | -0.923 | -2.308 | -0.583 |
|                              | Myl9     | -1.186 | -2.090 | -0.962 |
|                              | Cfl1     | -0.806 | -0.906 | -0.809 |
|                              | Actr3    | -0.695 | -0.748 | -0.741 |

|                                 |          |        |        |        |
|---------------------------------|----------|--------|--------|--------|
|                                 | Pfn1     | -0.979 | -1.172 | -0.893 |
|                                 | Rhob     | -0.640 | -1.238 | -0.801 |
|                                 | Actc1    | -0.796 | -1.389 | -0.905 |
|                                 | Arpc1b   | -0.727 | -1.238 | -0.955 |
|                                 | Myl12b   | -1.372 | -1.696 | -1.243 |
|                                 | Rhog     | -1.490 | -1.250 | -1.434 |
|                                 | Arpc2    | -1.549 | -1.327 | -1.315 |
|                                 | Arpc4    | -0.894 | -1.681 | -1.526 |
|                                 | Rhoa     | -0.957 | -1.453 | -1.034 |
|                                 | Gsn      | -0.989 | -1.694 | -1.191 |
|                                 | Mylk     | -1.118 | -1.664 | -1.109 |
| Fatty acid metabolism           | Aldh1a7  | -0.295 | -0.112 | -0.188 |
|                                 | H2-Ke6   | 0.946  | 0.834  | 0.059  |
|                                 | Aldh1b1  | 0.947  | -0.187 | 0.184  |
|                                 | Acad11   | 1.165  | 1.185  | 1.045  |
|                                 | Cpt1b    | 0.930  | 0.994  | 1.062  |
|                                 | Eci2     | 0.745  | 1.187  | 1.006  |
|                                 | Ech1     | 0.800  | 1.891  | 1.413  |
|                                 | Sdhd     | 1.211  | 1.470  | 1.536  |
|                                 | Acat1    | -0.122 | 0.617  | 0.419  |
|                                 | Acadsb   | -0.496 | 0.950  | 0.932  |
|                                 | Acadl    | 0.336  | 0.759  | 0.665  |
|                                 | Gcdh     | 0.137  | 0.851  | 0.540  |
|                                 | Acads    | 0.191  | 0.849  | 0.654  |
|                                 | Hadhb    | 0.243  | 0.832  | 0.598  |
|                                 | Echs1    | 0.481  | 1.199  | 0.632  |
|                                 | Hadha    | 0.555  | 1.102  | 0.752  |
|                                 | Acadvl   | 0.458  | 0.938  | 0.783  |
|                                 | Aldh4a1  | 0.368  | 1.068  | 0.766  |
|                                 | Auh      | 0.339  | 1.087  | 0.912  |
|                                 | Acadm    | 0.570  | 1.484  | 1.008  |
|                                 | Eci1     | 0.446  | 1.265  | 0.792  |
|                                 | Dhrs4    | 0.391  | 1.423  | 0.869  |
|                                 | Hsd17b1C | 0.029  | 1.228  | 1.008  |
|                                 | Hadh     | 0.178  | 1.423  | 0.544  |
| Glycolysis &<br>Gluconeogenesis | Pkm      | 0.941  | 1.604  | 1.518  |
|                                 | Eno3     | 0.672  | 1.285  | 1.113  |
|                                 | Pfkm     | 0.629  | 1.184  | 1.218  |
|                                 | Hsd17b1C | 0.029  | 1.228  | 1.008  |
|                                 | Dhrs4    | 0.391  | 1.423  | 0.869  |
|                                 | Ldhb     | 0.456  | 1.103  | 0.987  |
|                                 | Dld      | 0.435  | 1.011  | 0.754  |
|                                 | Aldh4a1  | 0.368  | 1.068  | 0.766  |
|                                 | Hk2      | 0.533  | 0.473  | 0.615  |
|                                 | Dlat     | 0.432  | 0.739  | 0.649  |
|                                 | Pdhb     | 0.387  | 0.734  | 0.738  |
|                                 | Pgm2     | 0.326  | 0.679  | 0.625  |
|                                 | Pfkl     | 0.254  | 0.587  | 0.664  |
|                                 | Pgam2    | 0.493  | 0.874  | 0.527  |
|                                 | Pdha1    | 0.856  | 0.810  | 0.594  |
|                                 | Aldh1b1  | 0.947  | -0.187 | 0.184  |

|                           |         |        |        |        |
|---------------------------|---------|--------|--------|--------|
|                           | Aldh9a1 | 0.733  | 0.281  | -0.002 |
|                           | Aldh1a7 | -0.295 | -0.112 | -0.188 |
|                           | Eno1    | -0.515 | -0.129 | 0.034  |
|                           | Pgam1   | -0.383 | -0.829 | -0.624 |
|                           | Pfkp    | -0.408 | -1.268 | -0.772 |
| <b>Rho signaling</b>      | Myl12a  | -1.781 | -2.217 | -1.996 |
|                           | 41523   | -1.489 | -1.924 | -2.094 |
|                           | Pfn1    | -0.979 | -1.172 | -0.893 |
|                           | Actc1   | -0.796 | -1.389 | -0.905 |
|                           | Arpc1b  | -0.727 | -1.238 | -0.955 |
|                           | Actb    | -0.501 | -0.656 | -0.687 |
|                           | Ezr     | -0.895 | -0.683 | -0.716 |
|                           | Cfl1    | -0.806 | -0.906 | -0.809 |
|                           | Actr3   | -0.695 | -0.748 | -0.741 |
|                           | Arhgap1 | -0.327 | -2.118 | -1.251 |
|                           | Myl6    | -0.486 | -2.088 | -1.119 |
|                           | Msn     | -0.595 | -1.542 | -1.120 |
|                           | 41519   | -0.362 | -1.550 | -1.059 |
|                           | Myl12b  | -1.372 | -1.696 | -1.243 |
|                           | Arpc2   | -1.549 | -1.327 | -1.315 |
|                           | Myl9    | -1.186 | -2.090 | -0.962 |
|                           | Arpc4   | -0.894 | -1.681 | -1.526 |
|                           | Mylk    | -1.118 | -1.664 | -1.109 |
|                           | Rhoa    | -0.957 | -1.453 | -1.034 |
|                           | Myl4    | 2.124  | -0.790 | -0.420 |
|                           | Myl7    | 1.332  | -0.668 | -0.208 |
|                           | Ttn     | 0.621  | 0.131  | -0.371 |
|                           | Myl3    | 0.623  | 0.018  | -0.040 |
|                           | Mylk3   | 0.585  | 0.864  | 0.643  |
|                           | Ktn1    | 0.704  | 0.757  | 1.094  |
| <b>Integrin Signaling</b> | Rac2    | -2.365 | -3.219 | -2.712 |
|                           | Myl12a  | -1.781 | -2.217 | -1.996 |
|                           | Mylk3   | 0.585  | 0.864  | 0.643  |
|                           | Actn3   | 0.259  | 0.255  | -0.174 |
|                           | Rap1a   | -0.065 | -0.151 | -0.137 |
|                           | Cav1    | 0.489  | -0.152 | -0.796 |
|                           | Ttn     | 0.621  | 0.131  | -0.371 |
|                           | Actn2   | 0.808  | 0.304  | -0.180 |
|                           | Acta2   | 0.266  | -0.804 | 0.244  |
|                           | Myl7    | 1.332  | -0.668 | -0.208 |
|                           | Rac3    | -0.923 | -2.308 | -0.583 |
|                           | Myl9    | -1.186 | -2.090 | -0.962 |
|                           | Actc1   | -0.796 | -1.389 | -0.905 |
|                           | Arpc1b  | -0.727 | -1.238 | -0.955 |
|                           | Arf3    | -0.531 | -1.387 | -0.712 |
|                           | Rhob    | -0.640 | -1.238 | -0.801 |
|                           | Rhoc    | -0.157 | -1.193 | -0.369 |
|                           | Capn2   | -0.368 | -0.977 | -0.624 |
|                           | Itgb1   | -0.571 | -1.018 | -0.716 |
|                           | Vcl     | -0.420 | -0.602 | -0.503 |
|                           | Actr3   | -0.695 | -0.748 | -0.741 |

|                         |         |        |        |        |
|-------------------------|---------|--------|--------|--------|
|                         | Myl12b  | -1.372 | -1.696 | -1.243 |
|                         | Mapk1   | -1.222 | -1.857 | -1.389 |
|                         | Actn1   | -1.119 | -1.840 | -1.484 |
|                         | Mylk    | -1.118 | -1.664 | -1.109 |
|                         | Actn4   | -1.107 | -1.471 | -1.160 |
|                         | Rhoa    | -0.957 | -1.453 | -1.034 |
|                         | Tln1    | -0.973 | -1.212 | -1.408 |
|                         | Arpc4   | -0.894 | -1.681 | -1.526 |
|                         | Grb2    | -0.780 | -0.606 | -1.517 |
|                         | Rap1b   | -1.420 | -0.913 | -1.024 |
|                         | Rhog    | -1.490 | -1.250 | -1.434 |
|                         | Arpc2   | -1.549 | -1.327 | -1.315 |
| <b>RhoGDI signaling</b> | Myl12a  | -1.781 | -2.217 | -1.996 |
|                         | Arhgdib | -1.290 | -1.372 | -1.657 |
|                         | Rhog    | -1.490 | -1.250 | -1.434 |
|                         | Arpc2   | -1.549 | -1.327 | -1.315 |
|                         | Arpc4   | -0.894 | -1.681 | -1.526 |
|                         | Myl12b  | -1.372 | -1.696 | -1.243 |
|                         | Myl9    | -1.186 | -2.090 | -0.962 |
|                         | Arhgap1 | -0.327 | -2.118 | -1.251 |
|                         | Myl6    | -0.486 | -2.088 | -1.119 |
|                         | Ezr     | -0.895 | -0.683 | -0.716 |
|                         | Cfl1    | -0.806 | -0.906 | -0.809 |
|                         | Actr3   | -0.695 | -0.748 | -0.741 |
|                         | Itgb1   | -0.571 | -1.018 | -0.716 |
|                         | Gnb2    | -0.565 | -0.785 | -0.501 |
|                         | Gdi2    | -0.630 | -0.779 | -0.571 |
|                         | Gnai2   | -1.013 | -1.511 | -0.932 |
|                         | Rhoa    | -0.957 | -1.453 | -1.034 |
|                         | Msn     | -0.595 | -1.542 | -1.120 |
|                         | Rhob    | -0.640 | -1.238 | -0.801 |
|                         | Actc1   | -0.796 | -1.389 | -0.905 |
|                         | Arpc1b  | -0.727 | -1.238 | -0.955 |
|                         | Prkca   | 0.233  | 0.996  | 1.129  |
|                         | Cdh13   | 0.789  | 0.905  | 1.317  |
|                         | Myl4    | 2.124  | -0.790 | -0.420 |
|                         | Myl7    | 1.332  | -0.668 | -0.208 |
|                         | Myl3    | 0.623  | 0.018  | -0.040 |
|                         | Acta2   | 0.266  | -0.804 | 0.244  |
|                         | Rhoc    | -0.157 | -1.193 | -0.369 |

**STAB 4 SS-peptides vs. saline in control hearts**

| JniProtKE | Gene ID     | SS31 control vs saline control |           |           |           | SS20 control vs saline control |           |           |           |
|-----------|-------------|--------------------------------|-----------|-----------|-----------|--------------------------------|-----------|-----------|-----------|
|           |             | log2.<br>fold.change           | SE        | unadj p.  | q.value.  | log2.<br>fold.change           | SE        | unadj p.  | q.value.  |
| Q9CUQ6    | A130006112R | -0.685846                      | 0.6923512 | 0.3375906 | 0.8743196 | -0.208323                      | 0.6473539 | 0.7527145 | 0.7375672 |
| Q8CAS4    | A130066N16  | -0.053975                      | 0.686003  | 0.9394883 | 0.9048359 | -0.231194                      | 0.941618  | 0.8142303 | 0.74734   |
| Q5YD48    | A1cf        | 0.0772822                      | 0.4802106 | 0.8728352 | 0.8994914 | -0.254685                      | 0.5079453 | 0.6187699 | 0.7091807 |
| Q8CAH3    | A230060F14R | -0.446459                      | 0.6897035 | 0.538066  | 0.8753373 | -1.893574                      | 0.9568213 | 0.0951523 | 0.6209341 |
| Q8CAG4    | A230065N10  | 0.9679984                      | 0.8030242 | 0.2671957 | 0.8743196 | 0.9983815                      | 0.6999604 | 0.2036653 | 0.6429844 |
| Q61838    | A2m         | -0.22585                       | 0.166049  | 0.174658  | 0.8743196 | -0.127387                      | 0.1780628 | 0.4749025 | 0.6774295 |
| Q6GQT1    | A2mp        | -0.456623                      | 0.5225834 | 0.4112093 | 0.8743196 | -2.232055                      | 1.275904  | 0.1308007 | 0.6209341 |
| Q8BHM4    | A330008L17R | 1.6052252                      | 0.9064241 | 0.1198711 | 0.8743196 | 0.9787753                      | 1.027149  | 0.3774325 | 0.6594641 |
| E9PWS6    | A630073D07  | -0.800125                      | 1.4153113 | 0.5894978 | 0.8753373 | -0.703069                      | 0.5858179 | 0.275313  | 0.6500471 |
| Q3UUJ1    | A830092H15  | 1.2190704                      | 1.3650815 | 0.4014938 | 0.8743196 | 0.8198926                      | 1.4897143 | 0.6019387 | 0.7069776 |
| Q9D2R0    | Aacs        | -0.065535                      | 0.270125  | 0.8089367 | 0.8943678 | -0.064308                      | 0.2821186 | 0.8203615 | 0.7482226 |
| Q99PG0    | Aadac       | -0.359591                      | 0.3565137 | 0.3162312 | 0.8743196 | -0.141866                      | 0.3356128 | 0.6738222 | 0.7234559 |
| B2RWD2    | Aadacl2     | 0.2221696                      | 0.7558041 | 0.77732   | 0.8940257 | -0.763037                      | 0.6092688 | 0.2570341 | 0.6500471 |
| Q9WVM8    | Aadat       | 0.2490701                      | 0.29142   | 0.3956045 | 0.8743196 | -0.043945                      | 0.3276223 | 0.8937325 | 0.7595603 |
| Q8R0P4    | Aamd        | -0.040944                      | 0.8635867 | 0.9625945 | 0.9067461 | 1.0896926                      | 0.674863  | 0.1220452 | 0.6209341 |
| Q9D2V5    | Aar2        | -0.399597                      | 0.5244802 | 0.4710104 | 0.8743196 | -0.584394                      | 0.3594762 | 0.1551424 | 0.6211692 |
| Q8BGQ7    | Aars        | 0.1233239                      | 0.1730989 | 0.4769601 | 0.8743196 | 0.1089371                      | 0.1911459 | 0.569415  | 0.6997388 |
| Q14CH7    | Aars2       | 0.290098                       | 0.6521209 | 0.6698558 | 0.8900083 | 0.4762613                      | 0.6475536 | 0.4897884 | 0.6803412 |
| Q80WC9    | Aasdh       | 0.0328949                      | 0.2244382 | 0.8876069 | 0.9006736 | -1.104034                      | 0.7939721 | 0.2137555 | 0.6429844 |
| Q9CQF6    | Aasdhppt    | -0.026729                      | 0.8952808 | 0.977016  | 0.9072902 | 0.1400737                      | 0.6752834 | 0.8425355 | 0.752567  |
| Q99K67    | Aass        | 0.121404                       | 0.1547576 | 0.4334446 | 0.8743196 | 0.1969037                      | 0.1631665 | 0.2287255 | 0.6442378 |
| P61922    | Abat        | -0.004502                      | 0.2489839 | 0.985597  | 0.9078335 | 0.145479                       | 0.2465853 | 0.5562165 | 0.6980496 |
| Q5SSE9    | Abca13      | 0.2663074                      | 0.5775293 | 0.6490471 | 0.8900083 | 0.7230243                      | 0.5862668 | 0.2317746 | 0.6442378 |
| P41234    | Abca2       | 3.1379259                      | 3.0188504 | 0.3331635 | 0.8743196 | -0.172768                      | 4.7242306 | 0.9720138 | 0.7753815 |
| O35600    | Abca4       | 0.528084                       | 0.7289761 | 0.492305  | 0.8748057 | -0.170638                      | 0.9009675 | 0.8560285 | 0.7553078 |
| Q8K442    | Abca8a      | -0.549647                      | 0.9809107 | 0.5835182 | 0.8753373 | 0.3502769                      | 0.3949767 | 0.3912821 | 0.661436  |
| Q9JI39    | Abcb10      | -0.721766                      | 0.6048527 | 0.271625  | 0.8743196 | -0.669099                      | 0.4713416 | 0.20554   | 0.6429844 |
| Q9QY30    | Abcb11      | -0.10452                       | 0.2789527 | 0.7189877 | 0.8910745 | -0.214688                      | 0.1935828 | 0.3098812 | 0.6577204 |
| P21440    | Abcb4       | -0.729671                      | 0.4751582 | 0.1382703 | 0.8743196 | 0.1212621                      | 0.2609474 | 0.647166  | 0.7177722 |
| Q61102    | Abcb7       | 1.5544377                      | 0.7876426 | 0.0890266 | 0.8743196 | 0.8951345                      | 0.9872884 | 0.3995327 | 0.6626324 |
| Q9CXJ4    | Abcb8       | 0.1995381                      | 0.8401335 | 0.8190647 | 0.8943678 | 1.0454985                      | 0.8424121 | 0.2608978 | 0.6500471 |
| O35379    | Abcc1       | -1.307602                      | 1.1674114 | 0.2996304 | 0.8743196 | -0.928614                      | 0.8166966 | 0.298885  | 0.6540599 |
| Q8R4P9    | Abcc10      | 0.5353417                      | 0.8750996 | 0.5600394 | 0.8753373 | -0.026992                      | 0.8671778 | 0.976178  | 0.776185  |
| B2RX12    | Abcc3       | -0.287659                      | 0.4870328 | 0.5733307 | 0.8753373 | -1.463587                      | 0.8836518 | 0.1487406 | 0.6209341 |
| P55096    | Abcd3       | 0.6083465                      | 0.2426864 | 0.0135351 | 0.8743196 | 0.5628646                      | 0.2873705 | 0.0528291 | 0.6209341 |
| P61222    | Abce1       | 0.293213                       | 0.35335   | 0.4108417 | 0.8743196 | 0.1831207                      | 0.3173556 | 0.5670806 | 0.6997388 |
| Q6P542    | Abcf1       | 0.8650424                      | 0.9748965 | 0.4043625 | 0.8743196 | 0.9250544                      | 1.2430134 | 0.4848681 | 0.6796099 |
| Q8K4F5    | Abhd11      | 1.0585219                      | 1.3053392 | 0.4441059 | 0.8743196 | 1.1144468                      | 1.4619648 | 0.4747747 | 0.6774295 |
| Q8VCR7    | Abhd14b     | -0.181101                      | 0.2233367 | 0.4201412 | 0.8743196 | -0.504609                      | 0.29252   | 0.0895022 | 0.6209341 |
| P00520    | Abi1        | -0.141327                      | 0.4892965 | 0.7810719 | 0.8940257 | 0.1954103                      | 0.4287113 | 0.6645592 | 0.7215904 |
| Q8K4G5    | Abli1       | -0.088382                      | 0.5074289 | 0.8640554 | 0.8974757 | 0.3926465                      | 0.532609  | 0.4740889 | 0.6774295 |
| Q8JZQ5    | Abp1        | 1.3846683                      | 1.6174358 | 0.4202848 | 0.8743196 | 2.1348275                      | 1.6368697 | 0.2399554 | 0.6482375 |
| Q4KML4    | Abrac1      | 0.8593662                      | 0.8780439 | 0.36032   | 0.8743196 | 1.5429558                      | 1.0576451 | 0.1948856 | 0.6418859 |
| Q99LJ2    | Abtb1       | 0.1934768                      | 0.3026353 | 0.5429698 | 0.8753373 | 0.055922                       | 0.3109972 | 0.8632169 | 0.7566266 |
| Q7TQI7    | Abtb2       | 0.0039434                      | 1.8506079 | 0.9983593 | 0.9113333 | 1.4546419                      | 1.8120235 | 0.4527239 | 0.6712964 |
| Q921H8    | Acaa1a      | -0.572813                      | 0.4746577 | 0.236641  | 0.8743196 | -0.503909                      | 0.386457  | 0.2032688 | 0.6429844 |
| Q8VCH0    | Acaa1b      | 0.2029359                      | 0.3111087 | 0.5169253 | 0.8753373 | -0.685308                      | 0.6850288 | 0.3221298 | 0.6594641 |
| Q8BWT1    | Acaa2       | -0.127218                      | 0.1467167 | 0.3865073 | 0.8743196 | -0.217                         | 0.187055  | 0.2469588 | 0.6500471 |
| Q5SWU9    | Acaca       | -0.42437                       | 0.2905236 | 0.1461738 | 0.8743196 | -0.00034                       | 0.2140108 | 0.998736  | 0.7804031 |
| Q8K370    | Acad10      | -0.468735                      | 0.3680158 | 0.2065112 | 0.8743196 | 0.0683322                      | 0.2980539 | 0.8193441 | 0.7482013 |
| Q9D7B6    | Acad8       | 0.1999123                      | 0.4014355 | 0.6200276 | 0.8824269 | 0.327717                       | 0.4808743 | 0.4980915 | 0.6823283 |
| Q8JZN5    | Acad9       | 0.356575                       | 0.2851986 | 0.2158254 | 0.8743196 | -0.131478                      | 0.3008425 | 0.6637983 | 0.7215904 |
| P51174    | Acadl       | 0.25698                        | 0.1690097 | 0.1295854 | 0.8743196 | 0.2347257                      | 0.1717599 | 0.1730877 | 0.6336186 |
| P45952    | Acadm       | 0.0242441                      | 0.1655129 | 0.8836437 | 0.9006736 | 0.1680108                      | 0.1400952 | 0.2315264 | 0.6442378 |
| Q07417    | Acads       | 0.4046963                      | 0.2174015 | 0.064146  | 0.8743196 | 0.5492789                      | 0.232187  | 0.0190978 | 0.6209341 |
| Q9DBL1    | Acadsb      | -0.180768                      | 0.2310506 | 0.4359401 | 0.8743196 | -0.089549                      | 0.2493746 | 0.7204368 | 0.7303836 |
| P50544    | Acadvi      | -0.103021                      | 0.2461567 | 0.6759722 | 0.8900083 | -0.351417                      | 0.2328687 | 0.1328974 | 0.6209341 |

|        |          |           |           |           |           |           |           |           |           |
|--------|----------|-----------|-----------|-----------|-----------|-----------|-----------|-----------|-----------|
| Q8BRH7 | Acap2    | 1.1234665 | 1.1171163 | 0.3480583 | 0.8743196 | -0.405133 | 1.1980286 | 0.7467568 | 0.7366386 |
| Q8QZT1 | Acat1    | -0.011095 | 0.1663731 | 0.946898  | 0.9060514 | -0.032136 | 0.1901484 | 0.8659983 | 0.7571111 |
| Q8CAY6 | Acat2    | -0.241343 | 0.302176  | 0.4263121 | 0.8743196 | 0.2763333 | 0.2509643 | 0.2737955 | 0.6500471 |
| B2RRQ1 | Accn1    | -0.070688 | 0.4611558 | 0.8825    | 0.9006736 | 0.078198  | 0.5418831 | 0.8899825 | 0.7592752 |
| Q91V92 | Acly     | 0.1581522 | 0.1996181 | 0.4289868 | 0.8743196 | 0.2763519 | 0.1959196 | 0.1598676 | 0.6243427 |
| Q8R519 | Acmsd    | -1.172776 | 0.5458049 | 0.0687444 | 0.8743196 | -0.424793 | 0.4785366 | 0.4088783 | 0.666531  |
| P28271 | Aco1     | 0.0912193 | 0.1891294 | 0.6299421 | 0.8854638 | -0.07389  | 0.1954858 | 0.7057553 | 0.7280735 |
| Q99KI0 | Aco2     | 0.2107089 | 0.1127163 | 0.0620789 | 0.8743196 | -0.076518 | 0.1295229 | 0.5549432 | 0.6980496 |
| O55137 | Acot1    | -0.063356 | 0.6170409 | 0.9195798 | 0.9048359 | -0.205193 | 0.6594179 | 0.7606032 | 0.7380771 |
| Q9DBK0 | Acot12   | 2.1408793 | 1.4417687 | 0.1582816 | 0.8743196 | 2.9027072 | 1.6362838 | 0.0994788 | 0.6209341 |
| Q9CQR4 | Acot13   | -0.360817 | 0.2964941 | 0.2269164 | 0.8743196 | -0.034861 | 0.2865688 | 0.9034968 | 0.7610813 |
| Q9QYR9 | Acot2    | 0.2216142 | 0.312569  | 0.4800554 | 0.8743196 | 0.3032637 | 0.3116472 | 0.3333313 | 0.6594641 |
| Q91V12 | Acot7    | -0.116518 | 0.390951  | 0.7743256 | 0.8935551 | -0.797708 | 0.3587152 | 0.0678431 | 0.6209341 |
| Q9R0X4 | Acot9    | -0.794596 | 0.5695403 | 0.1832847 | 0.8743196 | -1.467171 | 0.4647135 | 0.0075667 | 0.6209341 |
| Q9R0H0 | Acox1    | 0.3067356 | 0.1878219 | 0.103964  | 0.8743196 | 0.2723956 | 0.2152645 | 0.2073546 | 0.6429844 |
| Q9QXD1 | Acox2    | -0.171544 | 0.3029812 | 0.5726018 | 0.8753373 | 0.2400907 | 0.269828  | 0.3761496 | 0.6594641 |
| Q9D358 | Acp1     | 0.2009259 | 0.2508415 | 0.4292242 | 0.8743196 | -0.213387 | 0.2557561 | 0.4114115 | 0.6675611 |
| Q8BP40 | Acp6     | 0.6999495 | 0.3856022 | 0.0791773 | 0.8743196 | 0.6827188 | 0.3951685 | 0.0954721 | 0.6209341 |
| D3Z1Z2 | Acsbg1   | -0.547098 | 0.4781877 | 0.2901903 | 0.8743196 | 0.1385911 | 0.6354068 | 0.8345694 | 0.7519044 |
| Q8VCW8 | Acsf2    | 0.4593017 | 0.2024672 | 0.0245189 | 0.8743196 | 0.3662015 | 0.2015197 | 0.0711432 | 0.6209341 |
| Q3URE1 | Acsf3    | 0.5966727 | 0.3838134 | 0.1336972 | 0.8743196 | 0.2672375 | 0.4990972 | 0.5982486 | 0.7061107 |
| P41216 | Acs11    | 0.1541262 | 0.2053084 | 0.4536507 | 0.8743196 | 0.0761007 | 0.2069477 | 0.713489  | 0.7303836 |
| Q8JZR0 | Acs15    | -0.25668  | 0.3484987 | 0.4626147 | 0.8743196 | -0.030724 | 0.3822701 | 0.9360692 | 0.7671157 |
| Q91WC3 | Acs16    | 0.0213066 | 0.5350016 | 0.968576  | 0.9072902 | -0.27442  | 0.3624875 | 0.4578478 | 0.6712964 |
| Q91VA0 | Acsm1    | -0.328673 | 0.3524413 | 0.3523313 | 0.8743196 | -0.47491  | 0.341354  | 0.1661682 | 0.629443  |
| Q3UNX5 | Acsm3    | -0.74886  | 0.4883637 | 0.1309083 | 0.8743196 | 0.0743448 | 0.445318  | 0.8681126 | 0.7571111 |
| Q6P8J0 | Acsm5    | 0.1298769 | 1.0742824 | 0.9071701 | 0.9048359 | 1.6649945 | 1.0047781 | 0.1485802 | 0.6209341 |
| Q8BGA8 | Acsm5    | -0.022929 | 0.2693884 | 0.9323344 | 0.9048359 | 0.2648015 | 0.2276032 | 0.2477286 | 0.6500471 |
| Q99NB1 | Acss1    | -0.202047 | 0.1864431 | 0.2800638 | 0.8743196 | 0.1053147 | 0.1841125 | 0.568193  | 0.6997388 |
| Q9QXG4 | Acss2    | -0.227752 | 0.5462988 | 0.6780092 | 0.8900083 | -0.350558 | 0.5461779 | 0.5233445 | 0.6929797 |
| Q14DH7 | Acss3    | 1.2053639 | 0.9397371 | 0.2404475 | 0.8743196 | 0.7468006 | 1.0453764 | 0.5018234 | 0.6823283 |
| Q8BFZ3 | Actb12   | -0.046532 | 0.2425793 | 0.8533273 | 0.8962775 | -0.177421 | 0.2385897 | 0.4851945 | 0.6796099 |
| Q9QZ83 | Actg1    | -0.440512 | 0.3158806 | 0.183462  | 0.8743196 | -0.252057 | 0.3054019 | 0.4240714 | 0.6694352 |
| Q9CVR1 | Act17b   | -0.897606 | 0.4393998 | 0.08038   | 0.8743196 | -2.009165 | 1.8995859 | 0.3309115 | 0.6594641 |
| Q7TPR4 | Actn1    | -0.086236 | 0.3734862 | 0.8183982 | 0.8943678 | -0.179399 | 0.3343879 | 0.5945125 | 0.7056501 |
| Q9JI91 | Actn2    | 0.0933374 | 0.2073401 | 0.6662016 | 0.8900083 | 0.0392743 | 0.2079359 | 0.856416  | 0.7554726 |
| P57780 | Actn4    | 0.1915338 | 0.3016898 | 0.5266552 | 0.8753373 | -0.035691 | 0.3871601 | 0.926716  | 0.763737  |
| P61164 | Actr1a   | -0.240038 | 0.9465977 | 0.8032627 | 0.8943678 | 0.5117374 | 0.5785573 | 0.3924887 | 0.6617406 |
| Q8R5C5 | Actr1b   | 1.9894934 | 1.2058558 | 0.1429581 | 0.8743196 | 1.9454746 | 1.3807568 | 0.2084964 | 0.6429844 |
| P61161 | Actr2    | -0.273807 | 0.8176208 | 0.7392033 | 0.8923639 | 0.4933324 | 0.9052101 | 0.5887115 | 0.7049451 |
| Q99JY9 | Actr3    | 0.0820014 | 0.3203884 | 0.7987343 | 0.8943678 | 0.0199064 | 0.2934732 | 0.9461388 | 0.769669  |
| Q80US4 | Actr5    | -0.264548 | 0.3807094 | 0.5095303 | 0.8753373 | -2.238339 | 1.4467343 | 0.1727868 | 0.6331328 |
| Q9D864 | Actr6    | -0.637341 | 0.8113089 | 0.4336977 | 0.8743196 | -1.46354  | 0.5309078 | 0.0329989 | 0.6209341 |
| Q8BXF8 | Actr3    | 0.3567363 | 1.4629559 | 0.8143423 | 0.8943678 | 1.2195321 | 1.0223244 | 0.2779368 | 0.6500471 |
| Q99JW2 | Acy1     | 0.8369321 | 0.6343551 | 0.2000385 | 0.8743196 | 1.0782451 | 0.658058  | 0.1169489 | 0.6209341 |
| Q91XE4 | Acy3     | -0.081984 | 0.3392708 | 0.809621  | 0.8943678 | 0.0713581 | 0.3416612 | 0.8351191 | 0.7519044 |
| P56376 | Acyp1    | 0.2874639 | 0.5355813 | 0.5993236 | 0.8772764 | -0.098081 | 0.6503884 | 0.8824457 | 0.7585208 |
| P56375 | Acyp2    | 0.2434671 | 0.3637548 | 0.5060936 | 0.8753373 | 0.0297845 | 0.4195572 | 0.9437004 | 0.7691222 |
| Q80SY6 | Adal     | -0.316728 | 0.3135941 | 0.3461289 | 0.8743196 | -0.21291  | 0.1340954 | 0.1634407 | 0.6273856 |
| O35598 | Adam10   | 1.1866174 | 1.0400418 | 0.2914235 | 0.8743196 | -0.45507  | 1.410418  | 0.7579081 | 0.7380771 |
| Q9R1V4 | Adam11   | 1.5721875 | 1.0001288 | 0.1599497 | 0.8743196 | 0.1678458 | 2.0729672 | 0.9381    | 0.7681455 |
| Q60813 | Adam1a   | 0.2033    | 1.3209888 | 0.8820316 | 0.9006736 | 1.5991934 | 1.4282881 | 0.3056683 | 0.6553142 |
| Q9R159 | Adam25   | 1.0014084 | 0.8134706 | 0.2580641 | 0.8743196 | 0.8085026 | 0.929841  | 0.4179915 | 0.6694352 |
| Q9R158 | Adam26a  | 0.0799285 | 1.3936632 | 0.9558681 | 0.9060514 | 1.1050833 | 1.3389134 | 0.4407421 | 0.6699704 |
| Q9JLN6 | Adam28   | -0.216832 | 0.4677034 | 0.6569978 | 0.8900083 | -0.418523 | 0.2308222 | 0.1197459 | 0.6209341 |
| Q811Q3 | Adam30   | -0.012452 | 0.506523  | 0.9807114 | 0.907495  | 0.7312604 | 0.4753739 | 0.1479572 | 0.6209341 |
| Q8K410 | Adam32   | 0.2109697 | 1.1952045 | 0.8622517 | 0.897347  | 1.3147025 | 1.1552219 | 0.2756387 | 0.6500471 |
| Q923W9 | Adam33   | -0.159616 | 1.3444053 | 0.9088277 | 0.9048359 | 0.9285296 | 1.1870295 | 0.4638221 | 0.6731374 |
| O35227 | Adam7    | -0.208146 | 0.9784032 | 0.8375921 | 0.8946287 | 0.299013  | 0.4798726 | 0.5561412 | 0.6980496 |
| Q811B3 | Adamts12 | -0.804541 | 1.1265098 | 0.4982271 | 0.8748057 | 1.215285  | 0.7111754 | 0.1383407 | 0.6209341 |
| Q8BLI0 | Adamts11 | -1.971422 | 1.4770441 | 0.2237478 | 0.8743196 | 0.4592357 | 0.1536341 | 0.0243469 | 0.6209341 |

|        |          |           |           |           |           |           |           |           |           |
|--------|----------|-----------|-----------|-----------|-----------|-----------|-----------|-----------|-----------|
| Q60936 | Adck3    | -0.22963  | 0.2266789 | 0.3141432 | 0.8743196 | -0.189469 | 0.2308132 | 0.4145451 | 0.6675611 |
| O88444 | Adcy1    | 0.058778  | 0.2154582 | 0.792876  | 0.8943678 | -0.27224  | 0.2781747 | 0.3655406 | 0.6594641 |
| Q8C0T9 | Adcy10   | 0.3740569 | 0.4347086 | 0.4180202 | 0.8743196 | -0.777739 | 1.138044  | 0.5198577 | 0.6927469 |
| Q8VHH7 | Adcy3    | 0.0735163 | 0.6244329 | 0.9095863 | 0.9048359 | -0.64509  | 0.5860817 | 0.3132212 | 0.6594641 |
| P84309 | Adcy5    | -0.102097 | 1.1161814 | 0.9296816 | 0.9048359 | 1.4774474 | 0.8620277 | 0.1373732 | 0.6209341 |
| P51829 | Adcy7    | 0.9819941 | 1.1933509 | 0.4377023 | 0.8743196 | 0.3548134 | 1.2852502 | 0.79176   | 0.7439428 |
| P97490 | Adcy8    | -0.5108   | 0.9628364 | 0.6121619 | 0.8792876 | -2.057749 | 1.0441157 | 0.0962427 | 0.6209341 |
| Q9QYC0 | Add1     | -0.205086 | 0.9755227 | 0.8394747 | 0.8951804 | 0.557584  | 0.4289512 | 0.2413445 | 0.6491941 |
| Q9QYB8 | Add2     | -2.843508 | 2.996269  | 0.3742171 | 0.8743196 | -4.1993   | 3.1291945 | 0.228156  | 0.6442378 |
| G3UZ78 | Adgb     | 2.5879163 | 2.1542521 | 0.2686964 | 0.8743196 | 3.6301399 | 2.2481437 | 0.1574968 | 0.6211692 |
| P00329 | Adh1     | -0.163153 | 0.1708216 | 0.340489  | 0.8743196 | -0.16208  | 0.1779172 | 0.3633535 | 0.6594641 |
| Q9QYY9 | Adh4     | 0.1472113 | 0.5438663 | 0.788068  | 0.8943678 | -0.140947 | 0.5154542 | 0.7861675 | 0.7439428 |
| P28474 | Adh5     | -0.080257 | 0.2232553 | 0.7197089 | 0.8910745 | 0.0277806 | 0.2109357 | 0.8954105 | 0.7601149 |
| Q8R0N6 | Adhfe1   | 0.0788066 | 0.2512283 | 0.7546801 | 0.8923639 | 0.0388335 | 0.2877227 | 0.8930739 | 0.7595603 |
| Q99JT9 | Adi1     | -0.246633 | 0.3725578 | 0.5118651 | 0.8753373 | -0.318695 | 0.2829375 | 0.2678919 | 0.6500471 |
| Q60994 | Adipoq   | 0.8323334 | 0.4552249 | 0.0804891 | 0.8743196 | -0.043626 | 0.5761958 | 0.9403991 | 0.7686554 |
| P55264 | Adk      | 0.8341045 | 0.3804831 | 0.0303094 | 0.8743196 | 0.5271173 | 0.4263355 | 0.2190983 | 0.6434585 |
| Q8BGK2 | Adprhl1  | 0.1838951 | 0.3116689 | 0.5566975 | 0.8753373 | 0.2107645 | 0.2993085 | 0.4834783 | 0.6796099 |
| Q9JKV1 | Adrm1    | -0.427852 | 0.8239829 | 0.6085482 | 0.8792876 | 0.3772624 | 0.7711729 | 0.630018  | 0.7120542 |
| P54822 | Adsl     | -0.104505 | 0.2791092 | 0.7097747 | 0.8910745 | -0.130595 | 0.2868544 | 0.6513199 | 0.7191997 |
| P46664 | Adss     | 0.4257668 | 0.4637478 | 0.3891047 | 0.8743196 | -0.202091 | 0.6062724 | 0.7502222 | 0.7375672 |
| P28650 | Adssl1   | 0.1143417 | 0.3620187 | 0.7530469 | 0.8923639 | -0.143559 | 0.2709935 | 0.5981776 | 0.7061107 |
| O70618 | AF067063 | -0.750834 | 0.5107938 | 0.1850397 | 0.8743196 | -0.763276 | 0.2680236 | 0.0292662 | 0.6209341 |
| Q80YS6 | Afap1    | -1.197706 | 0.8446452 | 0.1991359 | 0.8743196 | -0.122534 | 0.1983426 | 0.5594171 | 0.6984692 |
| Q8BZ10 | Afap11   | 0.4034573 | 1.2476185 | 0.7558525 | 0.8923639 | 0.2144382 | 1.0148811 | 0.8396518 | 0.7524436 |
| O55112 | Aff2     | -0.139928 | 1.0440511 | 0.8971553 | 0.9017905 | -2.389485 | 1.002699  | 0.0545405 | 0.6209341 |
| Q8JZQ2 | Afg3l2   | 0.0487775 | 0.4636867 | 0.919172  | 0.9048359 | -0.118188 | 0.4878205 | 0.8166333 | 0.7474231 |
| O89020 | Afm      | -0.167111 | 0.3407428 | 0.6257798 | 0.8827708 | 0.0382699 | 0.3845091 | 0.9211327 | 0.7630855 |
| Q8CDK2 | Agbl2    | -0.414153 | 0.2988008 | 0.2082768 | 0.8743196 | -0.571651 | 0.185821  | 0.0217644 | 0.6209341 |
| Q8CDP0 | Agbl3    | 2.0500696 | 1.3480037 | 0.1721117 | 0.8743196 | 1.8273046 | 1.5386793 | 0.2798766 | 0.6506857 |
| Q09M02 | Agbl5    | -0.334553 | 0.5653221 | 0.5725992 | 0.8753373 | -0.434877 | 0.5057549 | 0.4228878 | 0.6694352 |
| Q62151 | Ager     | 0.6335691 | 0.6014512 | 0.3271547 | 0.8743196 | 0.3368887 | 1.5354632 | 0.833608  | 0.7519044 |
| F8VPN4 | Agl      | -0.093287 | 0.2333379 | 0.6901357 | 0.8900083 | 0.16725   | 0.2275387 | 0.4642264 | 0.6733118 |
| A2AS89 | Agmat    | -0.2435   | 0.4576492 | 0.5976985 | 0.8770074 | -0.614343 | 0.5589899 | 0.2794796 | 0.6506857 |
| Q8K3K7 | Agpat2   | 1.676048  | 0.7839184 | 0.0493808 | 0.8743196 | 1.4588824 | 0.8409696 | 0.1064124 | 0.6209341 |
| Q5U5V2 | Agphd1   | -0.143913 | 0.1718455 | 0.4109552 | 0.8743196 | -0.240637 | 0.1300485 | 0.0790914 | 0.6209341 |
| O88312 | Agr2     | -1.32569  | 1.1677791 | 0.2936528 | 0.8743196 | -2.169901 | 0.5375439 | 0.0068282 | 0.6209341 |
| O35423 | Agxt     | -0.432222 | 0.3260276 | 0.1891814 | 0.8743196 | 0.138157  | 0.3455832 | 0.690693  | 0.724834  |
| Q3UEG6 | Agxt2    | -0.098982 | 0.3254975 | 0.7616254 | 0.8923639 | 0.0198709 | 0.352578  | 0.9551718 | 0.7716792 |
| Q8BWU8 | Agxt2l1  | 0.0998394 | 0.2580566 | 0.6998782 | 0.8901989 | -0.076106 | 0.2651612 | 0.7749577 | 0.7428116 |
| Q8CJF7 | Ahctf1   | 1.118116  | 1.1203107 | 0.3515017 | 0.8743196 | 0.5978518 | 1.2591356 | 0.6517106 | 0.7192628 |
| P50247 | Ahcy     | 0.4020426 | 0.2124881 | 0.0593869 | 0.8743196 | 0.5460634 | 0.2292681 | 0.0179003 | 0.6209341 |
| E9Q616 | Ahnak    | -0.90759  | 0.6031414 | 0.1760973 | 0.8743196 | -1.380404 | 1.3304377 | 0.3394703 | 0.6594641 |
| Q8BK64 | Ahsa1    | -0.603876 | 0.4165849 | 0.1572156 | 0.8743196 | -0.079734 | 0.4923215 | 0.8725475 | 0.7574724 |
| P29699 | Ahsg     | -0.167356 | 0.3983177 | 0.6755118 | 0.8900083 | 0.1047341 | 0.2623909 | 0.6910132 | 0.724834  |
| Q9Z0X1 | Aifm1    | 0.5723694 | 0.2429235 | 0.0202185 | 0.8743196 | 0.7200637 | 0.2624009 | 0.0072287 | 0.6209341 |
| Q3TY86 | Aifm3    | 0.6992253 | 0.9440443 | 0.4829928 | 0.8743196 | 2.016534  | 0.966148  | 0.0819161 | 0.6209341 |
| P31230 | Aimp1    | 0.0121262 | 0.539897  | 0.982176  | 0.9077764 | 0.5393117 | 0.5713983 | 0.3507777 | 0.6594641 |
| Q8R010 | Aimp2    | 0.0695586 | 0.4211416 | 0.869885  | 0.898064  | -0.129792 | 0.420823  | 0.7601263 | 0.7380771 |
| Q9Z0E3 | Aire     | 0.6664124 | 1.0425982 | 0.543045  | 0.8753373 | -0.246061 | 0.9810368 | 0.8103237 | 0.7465637 |
| Q9R0Y5 | Ak1      | -0.217304 | 0.2139153 | 0.3112473 | 0.8743196 | 0.0649036 | 0.1968212 | 0.7420782 | 0.7347883 |
| Q9WTP6 | Ak2      | 0.1065284 | 0.2077976 | 0.6091433 | 0.8792876 | 0.2499644 | 0.2279858 | 0.2754345 | 0.6500471 |
| Q9WTP7 | Ak3      | 0.0285309 | 0.21034   | 0.8923064 | 0.9006736 | 0.0742224 | 0.2457778 | 0.7631913 | 0.7390697 |
| Q9WUR9 | Ak4      | 0.4595748 | 0.2734455 | 0.1008183 | 0.8743196 | -0.305716 | 0.4481603 | 0.4997598 | 0.6823283 |
| Q920P5 | Ak5      | 1.201374  | 0.8845689 | 0.2165641 | 0.8743196 | 0.963396  | 1.1750369 | 0.443624  | 0.6699704 |
| O88845 | Akap10   | -0.954507 | 0.4543187 | 0.0737662 | 0.8743196 | -0.530901 | 0.5582475 | 0.3783169 | 0.6594641 |
| Q9WTQ5 | Akap12   | 0.5122821 | 0.7997461 | 0.5314757 | 0.8753373 | 0.7876233 | 0.7343307 | 0.3029703 | 0.6540599 |
| O54931 | Akap2    | -0.237953 | 0.1500133 | 0.1567118 | 0.8743196 | -0.077517 | 0.1446041 | 0.6111937 | 0.7082928 |
| Q60662 | Akap4    | 1.1292046 | 0.5823474 | 0.0715426 | 0.8743196 | 0.8700127 | 0.7678575 | 0.2776624 | 0.6500471 |
| Q9DBR0 | Akap8    | 0.1280087 | 0.6909318 | 0.8582713 | 0.897347  | -1.617671 | 0.8930585 | 0.1200449 | 0.6209341 |
| Q70FJ1 | Akap9    | -1.186099 | 0.8519549 | 0.1841568 | 0.8743196 | 0.9478079 | 0.7478419 | 0.2272484 | 0.6442378 |

|        |          |           |           |           |           |           |           |           |           |
|--------|----------|-----------|-----------|-----------|-----------|-----------|-----------|-----------|-----------|
| Q9JII6 | Akr1a1   | -0.224202 | 0.1813052 | 0.2176376 | 0.8743196 | -0.005909 | 0.216198  | 0.9782259 | 0.7762206 |
| P45376 | Akr1b1   | 0.3025828 | 0.1836953 | 0.1023453 | 0.8743196 | -0.110043 | 0.2204192 | 0.618737  | 0.7091807 |
| P21300 | Akr1b7   | 0.2663586 | 1.2006215 | 0.8307635 | 0.8943678 | 0.6359999 | 0.9819031 | 0.5411415 | 0.6979269 |
| P45377 | Akr1b8   | -0.375146 | 0.2942698 | 0.2150957 | 0.8743196 | -1.194628 | 0.3479497 | 0.002631  | 0.5840626 |
| Q8VC28 | Akr1c13  | -0.161438 | 0.2908236 | 0.579689  | 0.8753373 | 0.0520983 | 0.2403026 | 0.8287152 | 0.7516517 |
| Q91WT7 | Akr1c14  | -0.042574 | 0.2182577 | 0.8456372 | 0.8962775 | 0.170406  | 0.2106616 | 0.4201956 | 0.6694352 |
| Q8K023 | Akr1c18  | 1.9696874 | 1.5156586 | 0.2349109 | 0.8743196 | 1.9691678 | 1.611771  | 0.2676242 | 0.6500471 |
| P70694 | Akr1c6   | -0.022628 | 0.23524   | 0.9234602 | 0.9048359 | -0.32423  | 0.2800634 | 0.2485108 | 0.6500471 |
| Q8VCX1 | Akr1d1   | 0.1178032 | 0.221281  | 0.5955345 | 0.8770074 | -0.019486 | 0.2661373 | 0.9417841 | 0.7689523 |
| Q9DCT1 | Akr1e2   | -0.275968 | 1.4016961 | 0.8495146 | 0.8962775 | 0.4908363 | 0.4647583 | 0.3315747 | 0.6594641 |
| Q8CG76 | Akr7a2   | 0.0855229 | 0.2299673 | 0.7106826 | 0.8910745 | 0.1547098 | 0.2300356 | 0.5028345 | 0.6823857 |
| P31750 | Akt1     | -0.185106 | 0.6293814 | 0.7772055 | 0.8940257 | -0.423799 | 0.7166211 | 0.5758496 | 0.7015295 |
| P08680 | Alas2    | 0.4207014 | 1.1325263 | 0.7212749 | 0.8910745 | 1.8370467 | 0.9297575 | 0.0955742 | 0.6209341 |
| P07724 | Alb      | -0.132157 | 0.102345  | 0.196903  | 0.8743196 | -0.064319 | 0.1021535 | 0.5291019 | 0.6933955 |
| Q57119 | Aldh16a1 | -0.202691 | 0.4777413 | 0.6733055 | 0.8900083 | -0.052203 | 0.3891721 | 0.8939498 | 0.7595603 |
| P24549 | Aldh1a1  | 0.0003851 | 0.1708845 | 0.9982048 | 0.9113333 | -0.021287 | 0.17339   | 0.9024676 | 0.7610813 |
| Q35945 | Aldh1a7  | 0.489337  | 0.3907711 | 0.2133204 | 0.8743196 | 0.6366139 | 0.3946128 | 0.1101886 | 0.6209341 |
| Q9CZS1 | Aldh1b1  | 0.4978565 | 0.206806  | 0.0175066 | 0.8743196 | 0.0185243 | 0.2885479 | 0.9489277 | 0.7704627 |
| Q8R0Y6 | Aldh1I1  | 0.0981027 | 0.1127544 | 0.3846486 | 0.8743196 | 0.0153443 | 0.1274304 | 0.9042058 | 0.7612577 |
| Q8K009 | Aldh1I2  | -0.398588 | 0.6960172 | 0.5847846 | 0.8753373 | -0.269981 | 1.0401665 | 0.803883  | 0.7452956 |
| P47738 | Aldh2    | -0.23585  | 0.146292  | 0.1080861 | 0.8743196 | -0.024226 | 0.1471688 | 0.8693906 | 0.7571111 |
| P47740 | Aldh3a2  | -0.117415 | 0.3403162 | 0.7312302 | 0.8923639 | 0.0971316 | 0.368888  | 0.7932963 | 0.7439428 |
| Q8CHT0 | Aldh4a1  | -0.042503 | 0.1753983 | 0.8087911 | 0.8943678 | -0.270665 | 0.2051851 | 0.1889331 | 0.6405321 |
| Q8BWF0 | Aldh5a1  | 0.082951  | 0.189601  | 0.6623716 | 0.8900083 | 0.1836928 | 0.1949436 | 0.3477672 | 0.6594641 |
| Q9EQ20 | Aldh6a1  | 0.2559057 | 0.1915947 | 0.1828508 | 0.8743196 | 0.2026866 | 0.2082361 | 0.3314341 | 0.6594641 |
| Q9DBF1 | Aldh7a1  | 0.1519142 | 0.1989325 | 0.4461552 | 0.8743196 | -0.244384 | 0.228217  | 0.2860087 | 0.6518056 |
| Q8BH00 | Aldh8a1  | 0.3194119 | 0.3383847 | 0.3467126 | 0.8743196 | 0.5062756 | 0.3985263 | 0.2061877 | 0.6429844 |
| Q9JLJ2 | Aldh9a1  | -0.067583 | 0.2070709 | 0.7445301 | 0.8923639 | -0.125299 | 0.1821941 | 0.4926674 | 0.6814973 |
| P05064 | Aldoa    | -0.160421 | 0.1764397 | 0.3643833 | 0.8743196 | -0.197162 | 0.170732  | 0.2498214 | 0.6500471 |
| Q91Y97 | Aldob    | 0.0498405 | 0.1456362 | 0.732454  | 0.8923639 | -0.061289 | 0.165971  | 0.7122642 | 0.730149  |
| P05063 | Aldoc    | -0.331239 | 0.4860871 | 0.517496  | 0.8753373 | -1.097521 | 0.5143671 | 0.0768125 | 0.6209341 |
| Q8VDB2 | Alg12    | 0.2241899 | 0.4212959 | 0.6110917 | 0.8792876 | -0.300133 | 0.4324697 | 0.5136419 | 0.6888545 |
| Q9DB25 | Alg5     | 0.3545102 | 0.7415703 | 0.6471806 | 0.8896469 | -0.252378 | 1.1892094 | 0.8389586 | 0.7520607 |
| Q80Y20 | Alkbh8   | -0.809594 | 1.0036597 | 0.4464088 | 0.8743196 | 0.4351798 | 0.693463  | 0.5534185 | 0.6980496 |
| Q8K4E0 | Alms1    | 0.4987702 | 0.5335989 | 0.3647328 | 0.8743196 | -1.424941 | 0.6392676 | 0.0440805 | 0.6209341 |
| Q9CXB8 | Alpk1    | 2.0619837 | 1.1358712 | 0.1123341 | 0.8743196 | -0.283558 | 2.3596154 | 0.9082703 | 0.7612577 |
| Q91ZB0 | Alpk2    | 0.3823758 | 0.374329  | 0.3176441 | 0.8743196 | -0.605339 | 0.4706914 | 0.2131112 | 0.6429844 |
| Q924C5 | Alpk3    | 2.0384584 | 0.8983522 | 0.0575531 | 0.8743196 | 0.808416  | 1.275902  | 0.5497142 | 0.6980496 |
| Q60I26 | Als2cl   | -0.156475 | 0.8310402 | 0.855993  | 0.8971839 | 1.0118546 | 1.0475996 | 0.3714059 | 0.6594641 |
| Q8VHI4 | Als2cr8  | 2.4278515 | 1.6415338 | 0.1826706 | 0.8743196 | 2.4591418 | 1.7652917 | 0.2130276 | 0.6429844 |
| O09174 | Amacr    | -0.219297 | 0.2470073 | 0.3765605 | 0.8743196 | 0.2802748 | 0.2066563 | 0.1781725 | 0.6367473 |
| Q07456 | Ambp     | 0.0062584 | 0.2903244 | 0.9830859 | 0.9077764 | -0.39355  | 0.2077626 | 0.0806576 | 0.6209341 |
| Q9DBA8 | Amdhd1   | -0.072337 | 0.2426369 | 0.7660133 | 0.8923639 | -0.274623 | 0.2768358 | 0.3230096 | 0.6594641 |
| Q6NS69 | Amer3    | -0.185286 | 0.4492899 | 0.6923851 | 0.8900083 | 0.4083817 | 0.4181694 | 0.3664859 | 0.6594641 |
| Q8K592 | Amhr2    | 1.332335  | 0.6653408 | 0.0853061 | 0.8743196 | 0.7597685 | 0.7716416 | 0.3628375 | 0.6594641 |
| Q80UL9 | Amica1   | -1.193815 | 0.5178893 | 0.054575  | 0.8743196 | -1.726454 | 1.3098046 | 0.2355541 | 0.6442378 |
| Q8VHG2 | Amot     | -0.041835 | 0.6896087 | 0.9533218 | 0.9060514 | -0.579934 | 0.6611481 | 0.4141364 | 0.6675611 |
| Q3V1D3 | Ampd1    | -0.105101 | 0.2888588 | 0.7210483 | 0.8910745 | -1.283498 | 0.4829446 | 0.0197226 | 0.6209341 |
| Q8CFA2 | Amt      | -0.690005 | 0.5804356 | 0.2466595 | 0.8743196 | -0.156381 | 0.3311326 | 0.6418522 | 0.7159548 |
| Q9D3J8 | Amtn     | -1.373423 | 1.0933372 | 0.2493518 | 0.8743196 | -0.669364 | 1.2818804 | 0.6202591 | 0.7091807 |
| P00687 | Amy1     | -1.137102 | 0.4117391 | 0.028027  | 0.8743196 | -2.221042 | 0.6470505 | 0.0139273 | 0.6209341 |
| P00688 | Amy2     | -0.55001  | 0.4471057 | 0.2583723 | 0.8743196 | -0.810814 | 0.3891977 | 0.0823584 | 0.6209341 |
| Q9WVH6 | Angpt4   | -0.749041 | 1.2214076 | 0.5590954 | 0.8753373 | -3.289719 | 3.4531025 | 0.3775353 | 0.6594641 |
| Q8C8R3 | Ank2     | 0.3175757 | 0.5861858 | 0.595936  | 0.8770074 | -0.37461  | 0.6224934 | 0.5576646 | 0.6980496 |
| G5E8K5 | Ank3     | -1.139428 | 0.5317948 | 0.0693667 | 0.8743196 | -3.37934  | 1.3734285 | 0.0490852 | 0.6209341 |
| A2RT91 | Ankar    | 0.5690038 | 0.274449  | 0.0768462 | 0.8743196 | -0.315113 | 0.482777  | 0.5381328 | 0.6959071 |
| Q14DN9 | Ankdd1b  | -0.038162 | 0.3846399 | 0.9237489 | 0.9048359 | -1.366796 | 1.1250667 | 0.2700552 | 0.6500471 |
| Q810B6 | Ankfy1   | 0.1887713 | 0.2394593 | 0.45637   | 0.8743196 | 0.1705803 | 0.1200498 | 0.2051654 | 0.6429844 |
| Q8BZ25 | Ankk1    | 0.0431949 | 0.7470124 | 0.9555052 | 0.9060514 | 0.4859889 | 0.3971034 | 0.2668889 | 0.6500471 |
| Q6P1H6 | Ankle2   | -0.28436  | 0.2686892 | 0.3250556 | 0.8743196 | -0.51123  | 0.2104943 | 0.051252  | 0.6209341 |
| Q8COW1 | Ankmy1   | -0.592944 | 1.5355849 | 0.7108643 | 0.8910745 | -1.121584 | 1.6733978 | 0.527642  | 0.69337   |

|        |          |           |           |           |           |           |           |           |           |
|--------|----------|-----------|-----------|-----------|-----------|-----------|-----------|-----------|-----------|
| Q9CR42 | Ankrd1   | -0.642073 | 0.6301424 | 0.3421517 | 0.8743196 | -0.255217 | 0.1961031 | 0.2408414 | 0.6491941 |
| B2RW11 | Ankrd34a | -0.115025 | 1.0679017 | 0.9172473 | 0.9048359 | 0.8476421 | 0.9777217 | 0.4192814 | 0.6694352 |
| Q8BLB8 | Ankrd34c | 0.5401034 | 0.6828868 | 0.4549528 | 0.8743196 | -0.115046 | 1.1577807 | 0.9240834 | 0.7634944 |
| Q9CQM6 | Ankrd61  | 1.3201851 | 0.7857585 | 0.1368191 | 0.8743196 | 0.9375863 | 0.9090311 | 0.3421181 | 0.6594641 |
| P59672 | Anks1a   | -1.213339 | 0.8787809 | 0.209842  | 0.8743196 | -1.696221 | 1.6623671 | 0.3469215 | 0.6594641 |
| Q6GQX6 | Anks6    | 0.9852948 | 1.271147  | 0.4637512 | 0.8743196 | 0.4263044 | 1.4198133 | 0.7741148 | 0.7428116 |
| Q8BHY3 | Ano1     | -0.30762  | 0.3713378 | 0.4347709 | 0.8743196 | -1.374415 | 0.7065263 | 0.0997047 | 0.6209341 |
| Q8C5H1 | Ano4     | 0.6230934 | 0.4937392 | 0.2473734 | 0.8743196 | -0.467641 | 0.9815308 | 0.6506147 | 0.7191997 |
| Q14AT5 | Ano7     | 0.660032  | 0.9414797 | 0.5058963 | 0.8753373 | -0.634568 | 1.0123375 | 0.5538545 | 0.6980496 |
| O35381 | Anp32a   | 1.3465157 | 1.0553941 | 0.221415  | 0.8743196 | 1.9613557 | 0.9317537 | 0.0553067 | 0.6209341 |
| Q9EST5 | Anp32b   | -1.444303 | 1.4308572 | 0.3463952 | 0.8743196 | -0.005669 | 0.0913287 | 0.9525182 | 0.7710231 |
| P97449 | Anpep    | -1.816794 | 0.7679902 | 0.0499248 | 0.8743196 | -0.024611 | 0.4846538 | 0.961148  | 0.7730074 |
| Q9CZ52 | Antxr1   | 0.7867945 | 0.678619  | 0.2843062 | 0.8743196 | 0.2770938 | 0.9384304 | 0.7777361 | 0.7428116 |
| P10107 | Anxa1    | -0.902148 | 0.4238621 | 0.050289  | 0.8743196 | -0.215528 | 0.4448934 | 0.6361272 | 0.713543  |
| P97384 | Anxa11   | 0.0902141 | 0.2859251 | 0.7544838 | 0.8923639 | 0.2884521 | 0.3146425 | 0.3673843 | 0.6594641 |
| P07356 | Anxa2    | -0.025628 | 0.276219  | 0.9262727 | 0.9048359 | -0.007001 | 0.290489  | 0.9808289 | 0.7764059 |
| O35639 | Anxa3    | 0.5184916 | 0.5433176 | 0.3458064 | 0.8743196 | 0.0288542 | 0.6386148 | 0.9642262 | 0.7733493 |
| P97429 | Anxa4    | -0.851832 | 0.5238017 | 0.1078794 | 0.8743196 | -0.133118 | 0.5978901 | 0.824468  | 0.7492441 |
| P48036 | Anxa5    | -0.2864   | 0.2168286 | 0.1885463 | 0.8743196 | -0.033505 | 0.2058959 | 0.8709808 | 0.7571111 |
| P14824 | Anxa6    | -0.158967 | 0.175343  | 0.3653348 | 0.8743196 | -0.136305 | 0.1708767 | 0.4257702 | 0.6694352 |
| Q07076 | Anxa7    | 0.2612804 | 0.308216  | 0.3991559 | 0.8743196 | 0.5243291 | 0.3346515 | 0.1217385 | 0.6209341 |
| Q8BXQ6 | Aopep    | 0.0520535 | 0.336378  | 0.8790838 | 0.9006736 | -0.575973 | 0.483519  | 0.2548664 | 0.6500471 |
| O54754 | Aox1     | -0.097115 | 0.3717337 | 0.7962252 | 0.8943678 | -0.256695 | 0.3819205 | 0.5092001 | 0.6853401 |
| O35643 | Ap1b1    | 0.0042877 | 0.4817765 | 0.9929562 | 0.9100096 | -0.434903 | 0.7565537 | 0.5701537 | 0.6997388 |
| P22892 | Ap1g1    | 0.1602328 | 0.3334675 | 0.634242  | 0.8878094 | -0.90567  | 0.515656  | 0.0903681 | 0.6209341 |
| P35585 | Ap1m1    | 0.73686   | 0.5163003 | 0.1965726 | 0.8743196 | 0.3747838 | 0.4099197 | 0.3958215 | 0.6617584 |
| P17427 | Ap2a2    | 0.4528678 | 0.4437163 | 0.3180484 | 0.8743196 | 0.23276   | 0.4876032 | 0.6382842 | 0.7145801 |
| Q9DBG3 | Ap2b1    | -0.273185 | 0.5984135 | 0.6523013 | 0.8900083 | 0.4951848 | 0.4435762 | 0.2775069 | 0.6500471 |
| P84091 | Ap2m1    | -0.20731  | 0.6192108 | 0.7408124 | 0.8923639 | 0.5910087 | 0.5466873 | 0.2925287 | 0.6532982 |
| P62743 | Ap2s1    | -0.908534 | 1.1430511 | 0.4528131 | 0.8743196 | 0.8898407 | 1.0760834 | 0.4399194 | 0.6699704 |
| Q9Z1T1 | Ap3b1    | 0.106893  | 0.483633  | 0.8313849 | 0.8943678 | -0.010589 | 0.3798802 | 0.9786658 | 0.7762206 |
| O54774 | Ap3d1    | -0.521565 | 0.714317  | 0.4765426 | 0.8743196 | -0.234631 | 0.3414613 | 0.5040705 | 0.6828196 |
| P98084 | Apba2    | -2.777624 | 1.4908097 | 0.1047238 | 0.8743196 | -0.084344 | 0.4519915 | 0.8581191 | 0.7556239 |
| Q9Z1K7 | Apc2     | -0.273017 | 1.1448713 | 0.8183476 | 0.8943678 | 1.1598514 | 0.7762584 | 0.1857536 | 0.6405321 |
| Q8R146 | Apeh     | 0.2719752 | 0.2676017 | 0.3122842 | 0.8743196 | 0.6095912 | 0.2603063 | 0.0218112 | 0.6209341 |
| P28352 | Apex1    | -0.078718 | 0.8349384 | 0.9261346 | 0.9048359 | -0.23374  | 0.8216649 | 0.7805301 | 0.7434254 |
| Q68G58 | Apex2    | -0.161002 | 0.1511671 | 0.3222016 | 0.8743196 | -0.281484 | 0.1665582 | 0.1419856 | 0.6209341 |
| Q9WVQ5 | Apip     | 1.6564184 | 0.4997283 | 0.0128594 | 0.8743196 | 1.37144   | 0.8682052 | 0.1652728 | 0.6282331 |
| Q00623 | Apoa1    | -0.145421 | 0.2523185 | 0.5654759 | 0.8753373 | -0.28002  | 0.2545409 | 0.2738284 | 0.6500471 |
| Q8K4Z3 | Apoa1bp  | -0.121042 | 0.5819568 | 0.8360043 | 0.8943678 | 0.1593668 | 0.4872184 | 0.7450181 | 0.7359583 |
| P09813 | Apoa2    | 0.7130038 | 0.3856582 | 0.069865  | 0.8743196 | 0.1733111 | 0.481932  | 0.7207107 | 0.7303836 |
| P06728 | Apoa4    | -0.352322 | 0.3377165 | 0.3008204 | 0.8743196 | -0.195116 | 0.2639497 | 0.4629194 | 0.6728653 |
| Q8C7G5 | Apoa5    | -0.170609 | 0.8974453 | 0.8546224 | 0.8966973 | -0.31051  | 0.8658771 | 0.7321694 | 0.7326734 |
| E9Q414 | Apob     | 1.0654297 | 0.4961634 | 0.0425386 | 0.8743196 | 0.624772  | 0.55301   | 0.2719429 | 0.6500471 |
| Q9WV35 | Apobec2  | 0.0207183 | 0.8807397 | 0.9815426 | 0.907495  | -1.097158 | 0.8818036 | 0.2353851 | 0.6442378 |
| P33622 | Apoc3    | -0.143606 | 0.5001259 | 0.7823192 | 0.8940257 | -0.79291  | 0.7618126 | 0.3380707 | 0.6594641 |
| P08226 | Apoe     | 0.0936182 | 0.2145551 | 0.6633833 | 0.8900083 | -0.090942 | 0.2566345 | 0.7237825 | 0.730562  |
| Q9DCZ4 | Apoo     | -0.11399  | 0.3395214 | 0.7417187 | 0.8923639 | -0.969969 | 0.3550174 | 0.0171107 | 0.6209341 |
| Q78IK4 | Apool    | -0.076586 | 0.4074325 | 0.8534168 | 0.8962775 | -0.396457 | 0.5374275 | 0.4738063 | 0.6774295 |
| P08030 | Aprt     | 0.1466754 | 0.7638963 | 0.8531859 | 0.8962775 | 1.1570976 | 0.6450092 | 0.1229828 | 0.6209341 |
| Q02013 | Aqp1     | 0.5847893 | 0.9467015 | 0.5460294 | 0.8753373 | 1.6855272 | 0.8625384 | 0.0725401 | 0.6209341 |
| P55088 | Aqp4     | -2.903804 | 1.5770994 | 0.1081496 | 0.8743196 | -1.087589 | 0.7025971 | 0.1726005 | 0.6330666 |
| Q4LDD4 | Arap1    | -1.781245 | 1.1565261 | 0.1674158 | 0.8743196 | -1.544002 | 1.9096597 | 0.4496517 | 0.6701719 |
| Q8BZ05 | Arap2    | -1.173565 | 1.014074  | 0.2851185 | 0.8743196 | -0.051697 | 0.4166582 | 0.9053083 | 0.7612577 |
| Q5XJY5 | Arcn1    | 0.4352203 | 0.3091813 | 0.1624974 | 0.8743196 | 0.024863  | 0.4623375 | 0.9572423 | 0.7721509 |
| P61750 | Arf4     | -0.898663 | 0.5585782 | 0.1516868 | 0.8743196 | -0.625393 | 0.7134336 | 0.4144208 | 0.6675611 |
| P84084 | Arf5     | -0.018862 | 0.6610597 | 0.9776134 | 0.9072902 | 0.2826074 | 0.6967853 | 0.6916418 | 0.7249553 |
| Q99K28 | Arfgap2  | 0.0679836 | 0.3954373 | 0.8643894 | 0.8974757 | 0.8130554 | 0.3594198 | 0.0301953 | 0.6209341 |
| G3X9K3 | Arfgef1  | -0.532671 | 0.861121  | 0.5557797 | 0.8753373 | -0.589854 | 0.6121382 | 0.3724607 | 0.6594641 |
| Q8K221 | Arfip2   | -0.259013 | 0.6299255 | 0.6932373 | 0.8900083 | -1.591665 | 0.9872201 | 0.1580298 | 0.622065  |
| Q61176 | Arg1     | 0.3303162 | 0.2444835 | 0.1784981 | 0.8743196 | 0.3211733 | 0.2417967 | 0.1861589 | 0.6405321 |

|        |           |           |           |           |           |           |           |           |           |
|--------|-----------|-----------|-----------|-----------|-----------|-----------|-----------|-----------|-----------|
| Q80Y19 | Arhgap11a | -2.168982 | 1.344912  | 0.1508377 | 0.8743196 | 0.2623431 | 0.5473283 | 0.6486839 | 0.718397  |
| Q8K0Q5 | Arhgap18  | -0.148106 | 0.4512807 | 0.7523665 | 0.8923639 | -1.574185 | 0.6548992 | 0.0530265 | 0.6209341 |
| Q3V0V2 | Arhgap20  | 0.3707916 | 0.7107761 | 0.6179932 | 0.8816934 | -1.219707 | 1.1013163 | 0.3104902 | 0.6577795 |
| Q6IFT4 | Arhgap20  | 1.3265453 | 0.5681044 | 0.0338477 | 0.8743196 | 1.2118724 | 0.6574828 | 0.0882118 | 0.6209341 |
| Q6DFV3 | Arhgap21  | -0.495696 | 1.3673078 | 0.7276512 | 0.891572  | -0.208557 | 0.7220693 | 0.7824287 | 0.7436402 |
| Q8BL80 | Arhgap22  | -0.629975 | 0.454974  | 0.2086895 | 0.8743196 | -0.887602 | 0.6248959 | 0.2053077 | 0.6429844 |
| Q69ZH9 | Arhgap23  | -0.358697 | 0.4216576 | 0.423086  | 0.8743196 | -1.30062  | 1.3517597 | 0.3731218 | 0.6594641 |
| Q8BN58 | Arhgap28  | -0.455961 | 0.5469141 | 0.4319765 | 0.8743196 | 0.5303485 | 0.4708491 | 0.3030346 | 0.6540599 |
| Q8CGF1 | Arhgap29  | 0.5209319 | 1.3257281 | 0.7060556 | 0.8910745 | -2.177793 | 1.5895506 | 0.2197187 | 0.6434585 |
| Q91YM2 | Arhgap35  | -0.647782 | 1.4421705 | 0.6668848 | 0.8900083 | 0.9462006 | 1.5589119 | 0.5661202 | 0.6997388 |
| B1AUC7 | Arhgap36  | 0.5992303 | 0.4031987 | 0.180817  | 0.8743196 | 0.5681684 | 0.2728797 | 0.0824925 | 0.6209341 |
| P59281 | Arhgap39  | -0.717827 | 0.9045554 | 0.453502  | 0.8743196 | -0.406687 | 0.7038124 | 0.5843935 | 0.7048643 |
| Q99PT1 | Arhgdia   | -0.437657 | 0.2972173 | 0.1444902 | 0.8743196 | 0.0579996 | 0.2375926 | 0.8078006 | 0.745845  |
| Q61599 | Arhgdib   | -0.060767 | 0.6151913 | 0.9221713 | 0.9048359 | 0.069857  | 0.6873623 | 0.9200619 | 0.7627031 |
| Q61210 | Arhgef1   | 0.7693119 | 1.0414629 | 0.4841246 | 0.8743196 | 0.7859514 | 1.1429296 | 0.517351  | 0.6910975 |
| Q8BWA8 | Arhgef19  | -0.083315 | 0.9242156 | 0.9306955 | 0.9048359 | 0.1857252 | 0.8931573 | 0.8421527 | 0.752567  |
| Q60875 | Arhgef2   | -1.810944 | 0.8161157 | 0.0619705 | 0.8743196 | -0.431922 | 0.4250459 | 0.3487562 | 0.6594641 |
| D3YYY8 | Arhgef26  | -0.228103 | 0.3261001 | 0.5068185 | 0.8753373 | -0.815582 | 0.2966117 | 0.0333067 | 0.6209341 |
| Q8BW86 | Arhgef33  | 0.4048717 | 0.3034867 | 0.2239469 | 0.8743196 | -0.98928  | 0.9484313 | 0.3371084 | 0.6594641 |
| A1IGU4 | Arhgef37  | -1.385399 | 1.2375604 | 0.2998801 | 0.8743196 | 0.2400921 | 0.3313305 | 0.4959529 | 0.6823283 |
| E2QRQ2 | Arhgef38  | 0.0610658 | 0.4540519 | 0.8967998 | 0.9017905 | 0.3050407 | 0.504267  | 0.5673906 | 0.6997388 |
| Q80VK6 | Arhgef38  | -1.224272 | 1.4911928 | 0.438707  | 0.8743196 | 1.180097  | 1.2213123 | 0.3712333 | 0.6594641 |
| Q3UPH7 | Arhgef40  | -0.510713 | 0.9812702 | 0.6187936 | 0.8816934 | 0.7638053 | 0.7366131 | 0.339746  | 0.6594641 |
| E9Q7D5 | Arhgef5   | -0.219059 | 0.876379  | 0.8097958 | 0.8943678 | -0.258881 | 1.2634151 | 0.8444205 | 0.7531891 |
| A2BH40 | Arid1a    | -0.482622 | 0.5772171 | 0.4162092 | 0.8743196 | 0.1767239 | 0.4215496 | 0.6818966 | 0.7239064 |
| D3Z7U1 | Arid5a    | -1.910151 | 0.9862468 | 0.0939784 | 0.8743196 | -0.490886 | 0.3743513 | 0.237701  | 0.6456045 |
| Q9Z1K6 | Arih2     | 0.4877248 | 1.1462048 | 0.6832392 | 0.8900083 | 0.8990007 | 1.0280403 | 0.415484  | 0.6676091 |
| P61211 | Arl1      | 0.0902678 | 0.8908668 | 0.9221331 | 0.9048359 | 0.7547876 | 1.0037364 | 0.4805123 | 0.6794597 |
| Q8BIX3 | Arl14ep   | 0.1740609 | 0.6951361 | 0.8056766 | 0.8943678 | -0.331278 | 0.7959576 | 0.684052  | 0.724036  |
| Q3UKZ7 | Arl14epl  | -0.551084 | 0.4395503 | 0.2501823 | 0.8743196 | -1.94544  | 0.6911007 | 0.0305549 | 0.6209341 |
| Q9JMY3 | Arl6ip4   | -1.064856 | 1.0673713 | 0.3516814 | 0.8743196 | -1.026051 | 0.2447103 | 0.0057307 | 0.6209341 |
| Q9CQW2 | Arl8b     | -0.640856 | 0.7392902 | 0.4147458 | 0.8743196 | -0.013168 | 0.66363   | 0.9848127 | 0.7770959 |
| Q3URY6 | Armc2     | -0.337272 | 1.2650865 | 0.7974603 | 0.8943678 | -0.115595 | 0.8948927 | 0.901443  | 0.7610813 |
| A2AU72 | Armc3     | 0.3831886 | 0.7181825 | 0.6014681 | 0.8787717 | -0.25201  | 0.77774   | 0.7510702 | 0.7375672 |
| Q9D2I5 | Armc9     | -0.275004 | 0.4189905 | 0.5325743 | 0.8753373 | 0.8558077 | 0.2385615 | 0.0115404 | 0.6209341 |
| Q9WTL8 | Arntl     | 0.31961   | 1.2475558 | 0.8051707 | 0.8943678 | 0.3904086 | 1.0484615 | 0.7224206 | 0.7304131 |
| Q9R0Q6 | Arpc1a    | 0.6390779 | 0.601658  | 0.3049502 | 0.8743196 | -0.28081  | 0.8423222 | 0.7441662 | 0.7357935 |
| Q9WV32 | Arpc1b    | -0.413735 | 1.3966777 | 0.7756514 | 0.8940257 | 0.3621001 | 1.2189587 | 0.7764387 | 0.7428116 |
| Q9CVB6 | Arpc2     | 0.2335383 | 0.3388055 | 0.4940243 | 0.8748057 | 0.060993  | 0.3650851 | 0.86814   | 0.7571111 |
| Q9JM76 | Arpc3     | 0.3089442 | 0.372348  | 0.4117478 | 0.8743196 | 0.0491096 | 0.3727844 | 0.8959686 | 0.7602457 |
| P59999 | Arpc4     | -0.2256   | 0.2548232 | 0.3804919 | 0.8743196 | -0.358929 | 0.1925998 | 0.0695507 | 0.6209341 |
| Q9CPW4 | Arpc5     | 0.4052762 | 0.8445839 | 0.6459627 | 0.8896469 | 0.1602713 | 1.1914977 | 0.8973961 | 0.7607708 |
| P56212 | Arpp19    | 0.0376998 | 0.3913259 | 0.9259518 | 0.9048359 | -0.881162 | 0.5084188 | 0.1337728 | 0.6209341 |
| Q9DCB4 | Arpp21    | 0.3478989 | 0.5951625 | 0.5771999 | 0.8753373 | 0.7175355 | 0.595857  | 0.2738538 | 0.6500471 |
| Q7TPQ9 | Arrdc3    | 1.6508188 | 1.3496301 | 0.2608432 | 0.8743196 | 1.7231124 | 1.5290553 | 0.3028207 | 0.6540599 |
| P50429 | Arsb      | -0.212136 | 0.4777724 | 0.6601191 | 0.8900083 | 0.8532936 | 0.4256622 | 0.055126  | 0.6209341 |
| Q3TYD4 | Arsg      | 1.5366696 | 1.6635743 | 0.386368  | 0.8743196 | 3.5146497 | 1.1972519 | 0.0260965 | 0.6209341 |
| Q32KI9 | Arsi      | -0.09258  | 0.4529672 | 0.8438679 | 0.8958903 | -0.793649 | 0.5148363 | 0.1741181 | 0.6342694 |
| Q8BM89 | Arsj      | -0.445385 | 0.4697591 | 0.3746455 | 0.8743196 | -0.052793 | 0.2422084 | 0.8346786 | 0.7519044 |
| P98203 | Arvcf     | 0.4037882 | 0.2705794 | 0.1792502 | 0.8743196 | -0.244669 | 0.6755001 | 0.7296151 | 0.7324246 |
| Q91WU5 | As3mt     | 0.2725377 | 0.4643301 | 0.5600475 | 0.8753373 | 0.3719857 | 0.4680958 | 0.4313766 | 0.6694352 |
| Q9WV54 | Asah1     | 1.0596398 | 0.8399593 | 0.2263815 | 0.8743196 | 0.0117702 | 0.9278955 | 0.9900719 | 0.7779037 |
| Q7SIG6 | Asap2     | 1.0850748 | 1.2345694 | 0.4086053 | 0.8743196 | 0.0799504 | 1.613555  | 0.9620899 | 0.7730074 |
| Q9WV74 | Asb1      | 0.2928834 | 1.3708562 | 0.8369096 | 0.8943678 | 0.4291045 | 1.4371977 | 0.7753383 | 0.7428116 |
| Q9WV71 | Asb4      | -0.124025 | 0.5054192 | 0.8131932 | 0.8943678 | -0.814795 | 0.6390896 | 0.2494764 | 0.6500471 |
| Q9D8Z1 | Ascc1     | 0.8376606 | 0.9509417 | 0.4076106 | 0.8743196 | -0.144335 | 1.1383929 | 0.9032499 | 0.7610813 |
| Q02067 | Ascl1     | -3.073392 | 0.9248528 | 0.0127106 | 0.8743196 | -1.656898 | 1.0670578 | 0.1714664 | 0.6323131 |
| P34927 | Asgr1     | 0.2547239 | 0.4532939 | 0.57644   | 0.8753373 | 0.4393777 | 0.433187  | 0.3155295 | 0.6594641 |
| P24721 | Asgr2     | -0.01122  | 0.4012966 | 0.9784744 | 0.9073254 | -0.349843 | 0.4904575 | 0.5024481 | 0.6823283 |
| Q99MY8 | Ash1l     | 0.9100045 | 1.3449652 | 0.5203824 | 0.8753373 | 1.4607554 | 0.9566851 | 0.1776423 | 0.6355136 |
| Q91YI0 | Asl       | -0.00225  | 0.1538101 | 0.9883417 | 0.909002  | -0.080048 | 0.1609772 | 0.6195115 | 0.7091807 |

|        |          |           |           |           |           |           |           |           |           |
|--------|----------|-----------|-----------|-----------|-----------|-----------|-----------|-----------|-----------|
| Q54984 | Asna1    | 0.0797027 | 0.5074785 | 0.8796345 | 0.9006736 | -0.53213  | 0.5488723 | 0.3697388 | 0.6594641 |
| Q9DCQ2 | Aspdh    | -0.000109 | 0.2634445 | 0.9996702 | 0.9118594 | -0.272472 | 0.3561288 | 0.446073  | 0.6699704 |
| A0JNU3 | Aspg     | -0.030838 | 0.5410294 | 0.9550392 | 0.9060514 | -0.061978 | 0.5982831 | 0.9185246 | 0.7627031 |
| Q2TA57 | Asphd1   | 0.4706038 | 0.9034011 | 0.6184871 | 0.8816934 | 0.8514322 | 0.8895379 | 0.3754465 | 0.6594641 |
| Q8CJ27 | Aspm     | 1.1040114 | 0.7688233 | 0.1715358 | 0.8743196 | 2.0349758 | 0.8223593 | 0.0278944 | 0.6209341 |
| Q99MQ4 | Aspn     | 0.721292  | 0.6802946 | 0.3242314 | 0.8743196 | -0.276691 | 0.8356197 | 0.7518117 | 0.7375672 |
| Q8C0M9 | Asrgl1   | 0.1720441 | 0.4096919 | 0.677429  | 0.8900083 | -0.699299 | 0.6163748 | 0.2665423 | 0.6500471 |
| P16460 | Ass1     | 0.1484026 | 0.1668231 | 0.3742739 | 0.8743196 | -0.127625 | 0.1891352 | 0.5003007 | 0.6823283 |
| Q80Z10 | Astn2    | 0.4714541 | 0.4575382 | 0.3370972 | 0.8743196 | 0.0719436 | 0.2558688 | 0.788022  | 0.7439428 |
| P59598 | Asxl1    | -0.116239 | 0.2312517 | 0.6306356 | 0.8854638 | -0.187001 | 0.1736195 | 0.3228365 | 0.6594641 |
| Q8BZ32 | Asxl2    | -1.077657 | 0.3981086 | 0.0303328 | 0.8743196 | -2.227726 | 1.0153647 | 0.0706825 | 0.6209341 |
| Q92511 | Atad3    | -0.035503 | 0.7559899 | 0.9638548 | 0.9067461 | -1.791738 | 1.7132883 | 0.3359486 | 0.6594641 |
| Q9D8Z6 | Atg101   | 1.5994787 | 2.3328945 | 0.51501   | 0.8753373 | 2.1098151 | 2.6626458 | 0.4583169 | 0.6712964 |
| Q8CDJ3 | Atg14    | 0.6910679 | 0.7986107 | 0.4155226 | 0.8743196 | 0.7724297 | 0.9487891 | 0.4466741 | 0.6699704 |
| Q8C0J2 | Atg16l1  | 1.3018256 | 1.3826868 | 0.3777873 | 0.8743196 | 2.0791581 | 1.2461309 | 0.1462613 | 0.6209341 |
| Q6P4T0 | Atg2a    | -0.870274 | 0.6778841 | 0.2119919 | 0.8743196 | -0.495663 | 0.6147935 | 0.429595  | 0.6694352 |
| Q9CPX6 | Atg3     | 0.6304819 | 0.5599222 | 0.2688003 | 0.8743196 | 0.7697475 | 0.5774941 | 0.1937005 | 0.6418859 |
| Q9D906 | Atg7     | -0.13551  | 0.4271208 | 0.7554159 | 0.8923639 | -0.144288 | 0.3912032 | 0.7181907 | 0.7303836 |
| Q8BP56 | Ath11    | 2.242877  | 0.5952525 | 0.0070017 | 0.8743196 | 1.2352944 | 0.6665748 | 0.113287  | 0.6209341 |
| Q9CWJ9 | Atic     | -0.190801 | 0.2298694 | 0.4082976 | 0.8743196 | -0.532324 | 0.283168  | 0.0631243 | 0.6209341 |
| Q6PA06 | Atl2     | -0.946814 | 0.7226714 | 0.2314947 | 0.8743196 | -0.597043 | 0.710407  | 0.4328788 | 0.6697843 |
| Q91YH5 | Atl3     | 0.3271946 | 0.465948  | 0.4895927 | 0.8743196 | -0.083392 | 0.500289  | 0.8692891 | 0.7571111 |
| Q62388 | Atm      | -0.300865 | 0.3536604 | 0.423069  | 0.8743196 | -0.308556 | 0.2943211 | 0.3348523 | 0.6594641 |
| P48985 | Atoh1    | -0.151541 | 0.1624181 | 0.3818616 | 0.8743196 | -0.305701 | 0.1676601 | 0.118073  | 0.6209341 |
| O08997 | Atox1    | 0.0664057 | 0.5729358 | 0.9083232 | 0.9048359 | 0.366089  | 0.5731086 | 0.5272476 | 0.69337   |
| P98197 | Atp11a   | -0.841756 | 0.7500162 | 0.2793718 | 0.8743196 | 0.0016645 | 0.5915378 | 0.9977976 | 0.7800658 |
| Q9QZW0 | Atp11c   | -0.877547 | 0.5237839 | 0.1074001 | 0.8743196 | -0.306349 | 0.3264371 | 0.3592028 | 0.6594641 |
| Q8VDN2 | Atp1a1   | -0.341855 | 0.3942759 | 0.3888376 | 0.8743196 | -0.616282 | 0.2748624 | 0.0285387 | 0.6209341 |
| P14094 | Atp1b1   | -0.181259 | 0.6462243 | 0.782934  | 0.8940257 | 0.2174213 | 0.4029662 | 0.5986264 | 0.7061107 |
| P97370 | Atp1b3   | 0.6786661 | 0.5268163 | 0.238607  | 0.8743196 | 0.8514899 | 0.3461248 | 0.0491151 | 0.6209341 |
| O55143 | Atp2a2   | -0.415135 | 0.2861497 | 0.1486365 | 0.8743196 | -0.030515 | 0.2656321 | 0.908692  | 0.7612577 |
| Q64518 | Atp2a3   | 0.7371743 | 0.8124192 | 0.394368  | 0.8743196 | 0.939842  | 0.7928342 | 0.280667  | 0.6506857 |
| A7L9Z8 | Atp2c2   | 0.042423  | 0.4230707 | 0.9229382 | 0.9048359 | -0.049923 | 0.2688834 | 0.8588236 | 0.7556239 |
| Q03265 | Atp5a1   | -0.330498 | 0.1876042 | 0.0791066 | 0.8743196 | -0.128991 | 0.2028669 | 0.5254135 | 0.69337   |
| P56480 | Atp5b    | -0.021154 | 0.1532618 | 0.8903272 | 0.9006736 | -0.02445  | 0.1542858 | 0.874226  | 0.7577111 |
| Q91VR2 | Atp5c1   | -0.072069 | 0.2622102 | 0.7839055 | 0.8942061 | -0.047075 | 0.2951931 | 0.8736053 | 0.7576535 |
| Q9D3D9 | Atp5d    | -0.073415 | 0.6076216 | 0.9046111 | 0.9046692 | -0.142206 | 0.3676548 | 0.7019418 | 0.7266885 |
| P56382 | Atp5e    | 0.385634  | 0.9159145 | 0.6796986 | 0.8900083 | 1.7183938 | 0.5970683 | 0.0129417 | 0.6209341 |
| Q9CQ7  | Atp5f1   | 0.2955057 | 0.2984207 | 0.3258488 | 0.8743196 | -0.078932 | 0.3286272 | 0.8110773 | 0.7465637 |
| Q9DCX2 | Atp5h    | 0.3612503 | 0.298756  | 0.2306043 | 0.8743196 | -0.263915 | 0.4210952 | 0.5331336 | 0.6951756 |
| Q06185 | Atp5i    | 0.3031473 | 0.5084059 | 0.5598863 | 0.8753373 | -0.465897 | 0.7582265 | 0.5495174 | 0.6980496 |
| P97450 | Atp5j    | -0.338058 | 0.4367591 | 0.4447856 | 0.8743196 | 0.1330635 | 0.2880439 | 0.6478138 | 0.7179029 |
| P56135 | Atp5j2   | -0.630513 | 0.8819027 | 0.4856221 | 0.8743196 | 0.2142684 | 0.6318041 | 0.739922  | 0.7346307 |
| Q9CPQ8 | Atp5l    | 0.1661833 | 0.6633786 | 0.8093862 | 0.8943678 | 0.1030749 | 0.7124286 | 0.8897003 | 0.7592752 |
| Q9DB20 | Atp5o    | 0.6700436 | 0.5980958 | 0.2682803 | 0.8743196 | 0.7244652 | 0.6055336 | 0.2384103 | 0.6456045 |
| Q9CRA7 | Atp5s    | 2.7328875 | 1.3894159 | 0.0898967 | 0.8743196 | 0.5300976 | 1.979968  | 0.7978726 | 0.7439428 |
| Q9Z1G4 | Atp6v0a1 | -0.138239 | 0.6015464 | 0.8248136 | 0.8943678 | -0.208753 | 0.40638   | 0.6258319 | 0.7115156 |
| P15920 | Atp6v0a2 | 1.9226307 | 2.0068319 | 0.3699526 | 0.8743196 | 2.964955  | 2.121983  | 0.2118235 | 0.6429844 |
| P51863 | Atp6v0d1 | -0.724077 | 0.5337358 | 0.1827031 | 0.8743196 | -0.181455 | 0.4757508 | 0.7052735 | 0.7280735 |
| P50516 | Atp6v1a  | -0.330177 | 0.4022234 | 0.4167049 | 0.8743196 | -0.627797 | 0.4595009 | 0.1808266 | 0.6395902 |
| P62814 | Atp6v1b2 | 0.9852425 | 0.6984807 | 0.1663039 | 0.8743196 | 0.9529517 | 0.7383438 | 0.2055291 | 0.6429844 |
| Q9Z1G3 | Atp6v1c1 | -0.638732 | 0.6416983 | 0.3527078 | 0.8743196 | -0.186426 | 0.2268265 | 0.4425689 | 0.6699704 |
| Q9CR51 | Atp6v1g1 | -0.33921  | 0.5469534 | 0.5444463 | 0.8753373 | 0.501378  | 0.4943577 | 0.3289918 | 0.6594641 |
| Q8BVE3 | Atp6v1h  | 1.0387508 | 0.8650192 | 0.2688656 | 0.8743196 | 1.0793627 | 0.8734461 | 0.2627355 | 0.6500471 |
| Q64446 | Atp7b    | -0.162289 | 0.9771836 | 0.8727902 | 0.8994914 | 0.7237424 | 0.4877261 | 0.1883623 | 0.6405321 |
| P70704 | Atp8a1   | -1.301507 | 1.3727613 | 0.3746549 | 0.8743196 | -1.488379 | 0.866651  | 0.1367162 | 0.6209341 |
| A3FIN4 | Atp8b5   | -0.07546  | 0.7115062 | 0.9185122 | 0.9048359 | -0.092823 | 0.9165957 | 0.9226362 | 0.7632924 |
| Q81110 | Atpaf1   | 0.3777271 | 0.6618845 | 0.5737476 | 0.8753373 | 0.8744267 | 0.6547416 | 0.1967045 | 0.6429844 |
| Q91YY4 | Atpaf2   | -0.299676 | 0.8073988 | 0.7214956 | 0.8910745 | -1.287093 | 0.8490677 | 0.1803307 | 0.6391063 |
| Q9JKK8 | Atr      | -2.241733 | 0.8113345 | 0.027974  | 0.8743196 | -0.680836 | 0.4415125 | 0.1739996 | 0.6342694 |
| Q9WU60 | Atrn     | -0.086204 | 0.6819191 | 0.9029586 | 0.9042231 | -0.293467 | 0.6033346 | 0.6439333 | 0.7165096 |

|        |            |           |           |           |           |           |           |           |           |
|--------|------------|-----------|-----------|-----------|-----------|-----------|-----------|-----------|-----------|
| Q6A051 | Atrn1      | 0.1310329 | 0.380646  | 0.7407768 | 0.8923639 | 0.0665982 | 0.4311744 | 0.8823135 | 0.7585208 |
| Q61687 | Atrx       | 0.3383845 | 0.2668518 | 0.2241054 | 0.8743196 | 0.2024183 | 0.2277119 | 0.3901969 | 0.6611124 |
| P28658 | Atxn10     | -0.109147 | 0.821475  | 0.8980373 | 0.9021997 | -1.500693 | 0.9204378 | 0.1541362 | 0.6211692 |
| Q62300 | Atxn10     | -0.418732 | 0.9062486 | 0.6580631 | 0.8900083 | -0.369859 | 0.9167253 | 0.7005972 | 0.7266885 |
| O70305 | Atxn2      | 0.8114178 | 0.6381101 | 0.2441339 | 0.8743196 | -1.050826 | 1.1160005 | 0.3827454 | 0.6606339 |
| Q77QH0 | Atxn2l     | 0.7549453 | 0.916273  | 0.422887  | 0.8743196 | 1.3192811 | 0.8105082 | 0.127566  | 0.6209341 |
| Q8R4I1 | Atxn7      | -0.043861 | 0.7686086 | 0.9552464 | 0.9060514 | 0.6677524 | 0.7046759 | 0.360615  | 0.6594641 |
| Q9JLZ3 | Auh        | 0.0045971 | 0.5025847 | 0.992735  | 0.9099967 | -0.732708 | 0.3580057 | 0.0461907 | 0.6209341 |
| O88721 | Avpr2      | -1.331787 | 0.7227957 | 0.0852483 | 0.8743196 | -0.195983 | 0.2498925 | 0.4469383 | 0.6699704 |
| Q64726 | Azgp1      | 0.1006157 | 0.782403  | 0.8993839 | 0.9027695 | 0.7081394 | 0.8239777 | 0.4056805 | 0.6646266 |
| Q62036 | Azi1       | -1.653469 | 1.593329  | 0.3158291 | 0.8743196 | -0.413021 | 0.7965609 | 0.6128182 | 0.7082928 |
| Q3TRG2 | B230120H23 | -1.027744 | 1.6493167 | 0.5529496 | 0.8753373 | 0.5292459 | 0.2520503 | 0.0805041 | 0.6209341 |
| P01887 | B2m        | 0.4826024 | 0.3280661 | 0.1513559 | 0.8743196 | -0.193883 | 0.3106861 | 0.5378327 | 0.695758  |
| Q9Z0F0 | B3galt4    | -0.115696 | 0.2707648 | 0.682003  | 0.8900083 | -0.231217 | 0.1858257 | 0.2598025 | 0.6500471 |
| Q8K0J2 | B3gnt7     | -0.175555 | 0.568127  | 0.7663108 | 0.8923639 | -0.080657 | 0.672274  | 0.9084186 | 0.7612577 |
| Q9JMK0 | B4galt5    | -0.298747 | 0.483889  | 0.5565209 | 0.8753373 | -0.264366 | 0.8611083 | 0.7692145 | 0.7407476 |
| Q91X34 | Baat       | -0.082537 | 0.3736953 | 0.8261535 | 0.8943678 | 0.1614208 | 0.4509958 | 0.7222387 | 0.7304131 |
| Q3U143 | Babam1     | 0.9086513 | 0.6999331 | 0.2353529 | 0.8743196 | 1.1656656 | 0.7735416 | 0.1825506 | 0.6395902 |
| P97303 | Bach2      | -0.640417 | 0.7170918 | 0.4014756 | 0.8743196 | -1.094325 | 0.6814983 | 0.159449  | 0.6243427 |
| Q91YN9 | Bag2       | 0.3862975 | 0.4133356 | 0.3811117 | 0.8743196 | -0.981017 | 0.5292572 | 0.113228  | 0.6209341 |
| Q9JLV1 | Bag3       | 0.0222186 | 0.2886167 | 0.9387755 | 0.9048359 | 0.2706224 | 0.2861758 | 0.3466763 | 0.6594641 |
| Q9Z1R2 | Bag6       | -0.976088 | 1.1741919 | 0.4332494 | 0.8743196 | -0.327777 | 0.5482603 | 0.5718    | 0.7009073 |
| Q3UHD1 | Bai1       | 0.6183478 | 0.3069654 | 0.0558074 | 0.8743196 | 0.0714701 | 0.4598502 | 0.8780479 | 0.7585027 |
| Q80TT2 | Baiap3     | -0.495838 | 0.6074155 | 0.4412143 | 0.8743196 | -0.093948 | 0.650648  | 0.8899195 | 0.7592752 |
| Q9DCT6 | Bap18      | -0.749022 | 0.9581972 | 0.4600091 | 0.8743196 | -0.478336 | 0.2570401 | 0.1120777 | 0.6209341 |
| F6R4Y5 | Baz2b      | 0.2530046 | 0.4465757 | 0.5887198 | 0.8753373 | 0.2248873 | 0.4029755 | 0.596991  | 0.706009  |
| Q924Y0 | Bbox1      | 0.3031519 | 0.5373317 | 0.5744094 | 0.8753373 | 0.850541  | 0.4711054 | 0.0758652 | 0.6209341 |
| Q8C1Z7 | Bbs4       | -2.760399 | 3.09044   | 0.4014101 | 0.8743196 | -0.338476 | 0.2449614 | 0.2162936 | 0.6434585 |
| Q811G0 | Bbs9       | -0.420587 | 0.5344409 | 0.4571141 | 0.8743196 | -0.252728 | 0.2099547 | 0.2740263 | 0.6500471 |
| Q80Y74 | BC048502   | -0.466593 | 0.6266047 | 0.4807377 | 0.8743196 | -1.076261 | 1.1550504 | 0.3874042 | 0.6611124 |
| Q80XE3 | BC051076   | 0.2501233 | 0.278656  | 0.3992144 | 0.8743196 | 0.1485145 | 0.2996563 | 0.6377925 | 0.7145361 |
| I6L9E6 | BC060267   | -0.07206  | 0.324896  | 0.8308069 | 0.8943678 | -0.031561 | 0.2333957 | 0.8968548 | 0.7606546 |
| Q9R069 | Bcam       | 0.421686  | 1.1403936 | 0.7224855 | 0.8910745 | 0.6870749 | 0.5693602 | 0.2729432 | 0.6500471 |
| Q61334 | Bcap29     | 1.140329  | 0.7155644 | 0.1550526 | 0.8743196 | -0.457426 | 1.0754588 | 0.6854277 | 0.724036  |
| Q61335 | Bcap31     | 0.2175094 | 0.3287996 | 0.5115054 | 0.8753373 | 0.1573104 | 0.3239552 | 0.6298408 | 0.7120542 |
| Q8CCN5 | Bcas3      | 1.7075549 | 1.1185942 | 0.1707161 | 0.8743196 | 2.5076032 | 0.9228725 | 0.0347731 | 0.6209341 |
| P24288 | Bcat1      | -0.213665 | 0.2886077 | 0.4831858 | 0.8743196 | -0.321018 | 0.2411999 | 0.2315557 | 0.6442378 |
| O35855 | Bcat2      | -0.232374 | 0.2945349 | 0.433528  | 0.8743196 | -0.553134 | 0.5484054 | 0.3182137 | 0.6594641 |
| P50136 | Bckdha     | 0.4890355 | 0.2846067 | 0.087598  | 0.8743196 | 0.359714  | 0.3165588 | 0.2576819 | 0.6500471 |
| Q6P3A8 | Bckdhb     | 0.376761  | 0.3053046 | 0.2205077 | 0.8743196 | 0.4911591 | 0.3005325 | 0.1063325 | 0.6209341 |
| O55028 | Bckdk      | -0.000226 | 0.0046407 | 0.9624608 | 0.9067461 | -0.001245 | 0.0033283 | 0.721267  | 0.7303836 |
| P59017 | Bcl2l13    | 0.0801762 | 0.2575962 | 0.764677  | 0.8923639 | -0.3686   | 0.4230705 | 0.4171113 | 0.6692583 |
| Q9CPT0 | Bcl2l14    | 0.1006247 | 0.2814987 | 0.7312815 | 0.8923639 | -0.259086 | 0.3127103 | 0.4390845 | 0.6699704 |
| O88282 | Bcl6b      | -0.363368 | 0.7276371 | 0.6328216 | 0.8871373 | -0.461536 | 0.4758968 | 0.3695883 | 0.6594641 |
| Q9D219 | Bcl9       | 0.3120103 | 0.5933321 | 0.6152271 | 0.8804696 | -0.012798 | 0.7673831 | 0.9872344 | 0.7775007 |
| Q67FY2 | Bcl9l      | -0.403085 | 0.5843823 | 0.5125545 | 0.8753373 | -4.704909 | 2.5553786 | 0.1151898 | 0.6209341 |
| Q8CGN4 | Bcor       | -1.567251 | 0.4576285 | 0.003762  | 0.8743196 | -0.447493 | 0.5050766 | 0.3917178 | 0.6614566 |
| A2AQH4 | Bcorl1     | -0.28247  | 0.8314317 | 0.7440188 | 0.8923639 | 0.6542657 | 0.9995592 | 0.5370232 | 0.695758  |
| Q80XN0 | Bdh1       | -0.094927 | 0.3197733 | 0.7673546 | 0.8923639 | 0.3375693 | 0.301258  | 0.266372  | 0.6500471 |
| Q61125 | Bdkrb1     | 0.3088375 | 0.6121961 | 0.6294165 | 0.8854638 | 0.7366107 | 0.6698083 | 0.3136033 | 0.6594641 |
| Q571C7 | Bdp1       | -0.342376 | 0.3834087 | 0.4015238 | 0.8743196 | -0.342596 | 0.6565368 | 0.620489  | 0.7091807 |
| A2AMT1 | Bfsp1      | -0.821944 | 0.6986461 | 0.2778557 | 0.8743196 | 0.0931888 | 0.591563  | 0.879995  | 0.7585208 |
| Q99PV5 | Bhlhe41    | -0.188608 | 1.0495969 | 0.8624826 | 0.897347  | -0.116073 | 1.0075811 | 0.9120454 | 0.7624298 |
| O35490 | Bhmt       | 0.159607  | 0.1703439 | 0.3497881 | 0.8743196 | 0.1582232 | 0.1998777 | 0.4295558 | 0.6694352 |
| Q8BR07 | Bicd1      | 1.0298332 | 0.9508841 | 0.3146858 | 0.8743196 | 0.6794357 | 0.9308438 | 0.4929439 | 0.6814973 |
| Q921C5 | Bicd2      | 0.3653177 | 0.3855204 | 0.3583522 | 0.8743196 | -0.100671 | 0.4279381 | 0.8176823 | 0.7474231 |
| O08539 | Bin1       | -0.696117 | 0.5727932 | 0.2636448 | 0.8743196 | -0.607164 | 0.750616  | 0.4494568 | 0.6701719 |
| D3Z6Q9 | Bin2       | -0.521098 | 0.4197507 | 0.2544249 | 0.8743196 | -0.500135 | 0.3744817 | 0.2301297 | 0.6442378 |
| O88700 | Blm        | -0.263681 | 0.8586197 | 0.767703  | 0.8923639 | 0.4430735 | 0.3360072 | 0.2353836 | 0.6442378 |
| Q8R016 | Blmh       | 0.4799554 | 0.3802317 | 0.2472776 | 0.8743196 | 0.2919902 | 0.5655291 | 0.6241051 | 0.7111404 |
| Q9QUN3 | Blink      | -0.942704 | 0.7503492 | 0.2492906 | 0.8743196 | -0.50625  | 0.7528504 | 0.5263348 | 0.69337   |

|        |            |           |           |           |           |           |           |           |           |
|--------|------------|-----------|-----------|-----------|-----------|-----------|-----------|-----------|-----------|
| Q9CY64 | Blvra      | -0.406276 | 0.443574  | 0.3628117 | 0.8743196 | -0.157428 | 0.2532794 | 0.5365097 | 0.695758  |
| Q923D2 | Blvrb      | 0.0137945 | 0.2556769 | 0.9571088 | 0.9063776 | -0.008254 | 0.2385097 | 0.9724925 | 0.7753815 |
| P25916 | Bmi1       | 0.2348597 | 0.5662891 | 0.6907513 | 0.8900083 | -0.013011 | 0.5930887 | 0.983209  | 0.7770843 |
| Q3ULL2 | Bmi1       | -0.74206  | 0.9957131 | 0.4803869 | 0.8743196 | 0.7785238 | 0.3711597 | 0.0807514 | 0.6209341 |
| P98063 | Bmp1       | -0.388102 | 0.4702617 | 0.436426  | 0.8743196 | -0.336307 | 0.2380552 | 0.2074468 | 0.6429844 |
| Q9Z0L4 | Bmp15      | 0.8431922 | 0.6817769 | 0.256058  | 0.8743196 | 1.0533422 | 0.7333149 | 0.2009078 | 0.6429844 |
| P34821 | Bmp8a      | -1.130583 | 1.0597524 | 0.3214515 | 0.8743196 | -0.354271 | 0.3506908 | 0.3513849 | 0.6594641 |
| P36895 | Bmpr1a     | 1.3663139 | 1.4568478 | 0.3795407 | 0.8743196 | 2.2062385 | 1.3262578 | 0.1472696 | 0.6209341 |
| Q8BMQ3 | Bnc2       | 2.5667063 | 1.1198119 | 0.0556361 | 0.8743196 | 2.1005016 | 1.2310035 | 0.1388205 | 0.6209341 |
| Q9D8S9 | Bola1      | 0.6321126 | 0.7143154 | 0.3853574 | 0.8743196 | -0.288062 | 0.7015216 | 0.6857141 | 0.724036  |
| Q8CEI1 | Bola3      | -0.617369 | 0.3126673 | 0.0572879 | 0.8743196 | 0.0911148 | 0.2548294 | 0.7234584 | 0.730562  |
| P97452 | Bop1       | -0.211915 | 0.5818042 | 0.7264344 | 0.8910745 | -0.182006 | 0.5282111 | 0.7421733 | 0.7347883 |
| P15327 | Bpgm       | -0.297991 | 0.5012336 | 0.5550185 | 0.8753373 | 0.0002433 | 0.4110585 | 0.9995307 | 0.7805379 |
| Q8R164 | Bphl       | -0.178858 | 0.2816612 | 0.5266411 | 0.8753373 | -0.542465 | 0.2508348 | 0.0328607 | 0.6209341 |
| Q61114 | Bpifb1     | -0.262963 | 1.3011496 | 0.8455861 | 0.8962775 | 0.2129248 | 1.1425594 | 0.8583054 | 0.7556239 |
| Q9Z0S1 | Bpnt1      | -0.093941 | 0.2972667 | 0.7526842 | 0.8923639 | -0.045372 | 0.3384659 | 0.8936863 | 0.7595603 |
| P48754 | Brca1      | -1.111629 | 0.3469892 | 0.0059195 | 0.8743196 | -0.784931 | 0.45599   | 0.1088761 | 0.6209341 |
| P97929 | Brca2      | -0.397908 | 0.8873715 | 0.6602653 | 0.8900083 | -0.675869 | 1.2519589 | 0.5984274 | 0.7061107 |
| Q8R3B7 | Brd8       | -0.250115 | 1.3468189 | 0.8579405 | 0.897347  | -1.302918 | 1.3192251 | 0.3614684 | 0.6594641 |
| Q3UAW9 | Brf2       | -1.009683 | 1.4566401 | 0.5105466 | 0.8753373 | 0.7898917 | 0.9001672 | 0.4139698 | 0.6675611 |
| Q80Y55 | Bsdcl      | -0.917836 | 1.026131  | 0.4007822 | 0.8743196 | -0.291626 | 0.5317544 | 0.6031941 | 0.7075832 |
| P18572 | Bsg        | 0.4102071 | 0.6538002 | 0.5398183 | 0.8753373 | 0.0246603 | 0.7926538 | 0.9756536 | 0.776185  |
| O88737 | Bsn        | 0.0314284 | 0.4638112 | 0.9478706 | 0.9060514 | -0.029389 | 0.4604801 | 0.9511854 | 0.7706093 |
| Q80YW5 | Bspry      | -0.682281 | 1.7657777 | 0.7106833 | 0.8910745 | 1.9695035 | 1.4440104 | 0.2215431 | 0.6437885 |
| Q6GQW0 | Btbd11     | 0.3680334 | 1.5963391 | 0.8242587 | 0.8943678 | 1.0674677 | 0.7236624 | 0.1906357 | 0.6405321 |
| D3YUB6 | Btbd8      | -0.510237 | 0.8369718 | 0.56137   | 0.8753373 | 0.2080667 | 0.6014163 | 0.74118   | 0.7346307 |
| Q8C726 | Btbd9      | 1.0456786 | 1.0246582 | 0.3414522 | 0.8743196 | 1.2265666 | 1.1572031 | 0.3299638 | 0.6594641 |
| Q3UWQ2 | Btg4       | -0.751336 | 1.6710181 | 0.6665714 | 0.8900083 | 1.8632984 | 1.0925109 | 0.1389765 | 0.6209341 |
| Q62556 | Btn1a1     | 0.2215648 | 1.1364428 | 0.8480377 | 0.8962775 | 0.9366938 | 0.6572265 | 0.1776584 | 0.6355136 |
| Q3ULA2 | Btrc       | 0.2161329 | 1.0852415 | 0.8478017 | 0.8962775 | 0.8495242 | 1.4484998 | 0.5789301 | 0.7021424 |
| Q9CQC6 | Bzw1       | 0.020939  | 0.625888  | 0.9742458 | 0.9072902 | -0.131966 | 0.4009103 | 0.7532169 | 0.7375721 |
| Q91VK1 | Bzw2       | 0.3827605 | 0.7491454 | 0.6251159 | 0.8826986 | -1.732625 | 0.7023894 | 0.0486712 | 0.6209341 |
| Q8BNN2 | C030009H01 | 0.3521112 | 0.8518707 | 0.6917269 | 0.8900083 | 0.4480849 | 0.8375697 | 0.6118981 | 0.7082928 |
| Q8C865 | C130046B21 | 0.3199969 | 0.4932678 | 0.5372073 | 0.8753373 | 0.1814686 | 0.3953383 | 0.6623781 | 0.7215904 |
| P14106 | C1qb       | -0.36039  | 0.8962196 | 0.6995893 | 0.8901989 | 0.1406709 | 0.8486205 | 0.873787  | 0.7576535 |
| O35658 | C1qbp      | -0.07729  | 0.3145217 | 0.8066834 | 0.8943678 | 0.0718184 | 0.3361974 | 0.8316335 | 0.7519044 |
| Q8R5L1 | C1qbp      | -1.577777 | 0.958556  | 0.1437603 | 0.8743196 | -2.362369 | 1.6705674 | 0.2070597 | 0.6429844 |
| Q9ESN4 | C1ql3      | -2.297625 | 1.4954958 | 0.1683298 | 0.8743196 | -0.10002  | 0.1134887 | 0.4120538 | 0.6675611 |
| Q8R066 | C1qtnf4    | -1.027484 | 1.2477805 | 0.4374036 | 0.8743196 | 0.2028509 | 0.9207149 | 0.832928  | 0.7519044 |
| P21180 | C2         | -0.933259 | 2.4045984 | 0.7094646 | 0.8910745 | 0.1122123 | 0.4178974 | 0.7972955 | 0.7439428 |
| Q52KB6 | C2cd3      | -0.572845 | 0.8498235 | 0.5105184 | 0.8753373 | -0.069573 | 0.5480736 | 0.9009302 | 0.7610813 |
| P01027 | C3         | -0.051322 | 0.1271316 | 0.6866621 | 0.8900083 | -0.04108  | 0.1231519 | 0.7389099 | 0.7346307 |
| P01029 | C4b        | -1.227362 | 1.6572816 | 0.48304   | 0.8743196 | 0.5236092 | 0.251044  | 0.082082  | 0.6209341 |
| P06684 | C5         | -0.719594 | 0.511993  | 0.1802533 | 0.8743196 | -0.195335 | 0.6684924 | 0.7747436 | 0.7428116 |
| D3YXF5 | C7         | 0.496645  | 0.5571051 | 0.4022765 | 0.8743196 | 0.2395937 | 0.6110673 | 0.7085398 | 0.728514  |
| Q3UGU2 | C79130     | 0.4800843 | 0.7677725 | 0.5516092 | 0.8753373 | 1.0635281 | 0.6835062 | 0.1707132 | 0.6323131 |
| A2A4E2 | C86695     | 0.1385372 | 1.5005689 | 0.929028  | 0.9048359 | 0.6506827 | 1.9357422 | 0.7482083 | 0.737465  |
| Q8K182 | C8a        | -0.616364 | 0.6487827 | 0.3737352 | 0.8743196 | -1.095367 | 0.3461709 | 0.0194602 | 0.6209341 |
| Q8BH35 | C8b        | 0.1654156 | 0.3549376 | 0.6455695 | 0.8896469 | -0.845906 | 0.5587425 | 0.1456832 | 0.6209341 |
| Q8VCG4 | C8g        | -0.199864 | 0.4106622 | 0.6310864 | 0.8855458 | 0.2342156 | 0.4411927 | 0.6013555 | 0.7066507 |
| P13634 | Ca1        | -0.42995  | 0.2455314 | 0.0847961 | 0.8743196 | -0.636516 | 0.2870059 | 0.0307192 | 0.6209341 |
| O70354 | Ca11       | 0.5745431 | 0.9458183 | 0.5627273 | 0.8753373 | 0.7145985 | 1.0938889 | 0.5377991 | 0.695758  |
| Q9WVT6 | Ca14       | -0.474193 | 0.4154894 | 0.271644  | 0.8743196 | 0.0610393 | 0.2460415 | 0.8079441 | 0.745845  |
| P00920 | Ca2        | -0.055529 | 0.2258958 | 0.8061974 | 0.8943678 | -0.260503 | 0.2898961 | 0.3706916 | 0.6594641 |
| P16015 | Ca3        | 0.4244177 | 0.1999981 | 0.0348934 | 0.8743196 | -0.117422 | 0.2508974 | 0.640283  | 0.7151423 |
| P23589 | Ca5a       | 0.1230699 | 0.5442019 | 0.8241394 | 0.8943678 | 0.2070352 | 0.7000919 | 0.7721104 | 0.7423579 |
| Q8VDY9 | Caap1      | 0.6556578 | 1.2582103 | 0.6183688 | 0.8816934 | 1.6056201 | 1.3439688 | 0.277289  | 0.6500471 |
| Q06138 | Cab39      | -0.159727 | 0.3733746 | 0.6816556 | 0.8900083 | -0.486653 | 0.569499  | 0.4256105 | 0.6694352 |
| Q8VHC5 | Cabp4      | -0.213339 | 0.2166888 | 0.3576473 | 0.8743196 | -0.170999 | 0.2064372 | 0.4391817 | 0.6699704 |
| P97445 | Cacna1a    | -9.108779 | 2.7416592 | 0.0127237 | 0.8743196 | -9.377685 | 3.5356495 | 0.0379107 | 0.6209341 |
| Q3UY08 | Cacna1c    | -0.230841 | 0.7449134 | 0.765667  | 0.8923639 | -1.607378 | 1.0941375 | 0.1921987 | 0.6418859 |

|        |          |           |           |           |           |           |           |           |           |
|--------|----------|-----------|-----------|-----------|-----------|-----------|-----------|-----------|-----------|
| Q9JIS7 | Cacna1f  | 1.0301116 | 0.6778956 | 0.1494138 | 0.8743196 | 0.4970701 | 1.325954  | 0.7137962 | 0.7303836 |
| Q9Z1L5 | Cacna2d3 | -1.533621 | 0.7164519 | 0.069575  | 0.8743196 | -0.42361  | 0.695297  | 0.5646996 | 0.6997388 |
| Q5RJF7 | Cacna2d4 | -0.798527 | 0.8917045 | 0.400261  | 0.8743196 | -0.497412 | 0.8530121 | 0.5810495 | 0.7031064 |
| Q9CXW3 | Cacybp   | 0.8493809 | 1.2115523 | 0.5058903 | 0.8753373 | 0.7420528 | 1.3855501 | 0.6115189 | 0.7082928 |
| P62204 | Calm1    | 0.1117336 | 1.0318736 | 0.9147109 | 0.9048359 | 0.3146183 | 0.8466227 | 0.7140868 | 0.7303836 |
| P14211 | Calr     | -0.264786 | 0.3590193 | 0.4620831 | 0.8743196 | -0.183382 | 0.3394949 | 0.5901033 | 0.7051736 |
| Q9D9Q6 | Calr3    | 0.1948572 | 0.4372093 | 0.6621908 | 0.8900083 | -0.703752 | 0.4498764 | 0.1417502 | 0.6209341 |
| O35887 | Calu     | 1.5313785 | 0.6493034 | 0.0272222 | 0.8743196 | 1.2163935 | 0.6899352 | 0.0931656 | 0.6209341 |
| Q6PHZ2 | Camk2d   | -0.082918 | 0.4665934 | 0.860107  | 0.897347  | -0.283042 | 0.3424528 | 0.4157567 | 0.6677621 |
| P08414 | Camk4    | -1.329061 | 1.2103566 | 0.3085007 | 0.8743196 | -1.109811 | 1.3436911 | 0.4404353 | 0.6699704 |
| Q8C1B1 | Camsap2  | 0.0096302 | 0.4377156 | 0.9827371 | 0.9077764 | -0.454208 | 0.6374603 | 0.4887301 | 0.6803412 |
| Q6ZQ38 | Cand1    | 0.2775184 | 0.4157242 | 0.5065823 | 0.8753373 | 0.4216952 | 0.4417172 | 0.343451  | 0.6594641 |
| Q6ZQ73 | Cand2    | -0.33637  | 0.3440096 | 0.332458  | 0.8743196 | 0.3108191 | 0.3429858 | 0.3693485 | 0.6594641 |
| P35564 | Canx     | 0.0277509 | 0.3624774 | 0.939103  | 0.9048359 | 0.4578956 | 0.3454131 | 0.1878614 | 0.6405321 |
| P40124 | Cap1     | -0.096958 | 0.2043219 | 0.6361222 | 0.8883187 | -0.123136 | 0.2623012 | 0.6398882 | 0.7151423 |
| Q9CYT6 | Cap2     | -0.361242 | 0.4308458 | 0.4149401 | 0.8743196 | -1.431988 | 0.8409976 | 0.1123936 | 0.6209341 |
| P24452 | Capg     | -0.070157 | 0.4340539 | 0.8737535 | 0.8998386 | 0.1721875 | 0.3578603 | 0.6384015 | 0.7145801 |
| O35350 | Capn1    | 0.5919355 | 0.9853565 | 0.5669522 | 0.8753373 | -0.889356 | 0.9899884 | 0.4036066 | 0.6638484 |
| O08529 | Capn2    | 0.1189044 | 0.3681538 | 0.7476637 | 0.8923639 | -0.015644 | 0.3832569 | 0.9675709 | 0.7748325 |
| O88456 | Capns1   | -0.059007 | 0.5227967 | 0.9116326 | 0.9048359 | -0.227259 | 0.671167  | 0.740315  | 0.7346307 |
| Q60865 | Caprin1  | -0.540464 | 0.4415347 | 0.2270311 | 0.8743196 | -0.229133 | 0.5097355 | 0.6554291 | 0.7198872 |
| P47753 | Capza1   | -0.622742 | 0.515991  | 0.2666729 | 0.8743196 | 0.1137198 | 0.1571943 | 0.4966355 | 0.6823283 |
| P47754 | Capza2   | -0.116311 | 0.2675838 | 0.6678534 | 0.8900083 | -0.838752 | 0.3895178 | 0.0436766 | 0.6209341 |
| P47757 | Capzb    | 1.3292993 | 0.8349014 | 0.1180522 | 0.8743196 | 0.8560809 | 0.9354039 | 0.3654385 | 0.6594641 |
| Q8BZD6 | Car10    | -0.876746 | 1.2285995 | 0.4985612 | 0.8749765 | 0.7628917 | 0.9214248 | 0.4393831 | 0.6699704 |
| Q9CR86 | Carhsp1  | 0.1757427 | 0.5954889 | 0.7705472 | 0.8923639 | 0.7967613 | 0.4525077 | 0.0935616 | 0.6209341 |
| Q9CZ42 | Carkd    | 0.0842855 | 0.5247616 | 0.8732244 | 0.8996816 | 0.2826379 | 0.4586396 | 0.5418321 | 0.6979269 |
| Q9WVG6 | Carm1    | 0.2667765 | 1.0747558 | 0.8110882 | 0.8943678 | 0.612997  | 1.3986639 | 0.6765273 | 0.7239064 |
| Q9ER72 | Cars     | 0.6100782 | 0.4949006 | 0.2366489 | 0.8743196 | 1.0924718 | 0.3469434 | 0.0076887 | 0.6209341 |
| Q8BW29 | Cars2    | -3.31208  | 2.4008036 | 0.2101761 | 0.8743196 | -1.606943 | 1.0331496 | 0.1708549 | 0.6323131 |
| Q8BYM8 | Cars2    | 1.1011585 | 0.5459019 | 0.0619449 | 0.8743196 | 0.4208421 | 0.5530065 | 0.4602346 | 0.6712964 |
| Q8VHK1 | Caskin2  | 0.3420969 | 1.1220013 | 0.7693089 | 0.8923639 | -0.280515 | 1.3009436 | 0.8364238 | 0.7519044 |
| P70343 | Casp4    | -0.704985 | 0.4031324 | 0.1238152 | 0.8743196 | -1.843617 | 0.9509488 | 0.1006212 | 0.6209341 |
| P97864 | Casp7    | 1.591511  | 0.4985735 | 0.0152315 | 0.8743196 | 0.4411127 | 0.4533457 | 0.368123  | 0.6594641 |
| O89110 | Casp8    | -0.520153 | 0.3593703 | 0.1612788 | 0.8743196 | -1.233238 | 0.6548089 | 0.0742777 | 0.6209341 |
| O09161 | Casq2    | -0.053625 | 0.2678219 | 0.8421673 | 0.8955988 | -0.30639  | 0.3175839 | 0.3403248 | 0.6594641 |
| P51125 | Cast     | -0.285733 | 0.7690836 | 0.7154432 | 0.8910745 | -0.215063 | 0.6601126 | 0.7497621 | 0.7375672 |
| P24270 | Cat      | -0.143738 | 0.1718621 | 0.4034878 | 0.8743196 | -0.021201 | 0.1571389 | 0.8927604 | 0.7595603 |
| Q91ZR5 | Catsper1 | 0.743177  | 0.818615  | 0.3941385 | 0.8743196 | 1.3266608 | 0.8162523 | 0.1552224 | 0.6211692 |
| P49817 | Cav1     | -0.361622 | 1.1242208 | 0.7570994 | 0.8923639 | 1.6127734 | 0.8024509 | 0.0911786 | 0.6209341 |
| P22682 | Cbl      | 0.4145747 | 0.6086068 | 0.5176464 | 0.8753373 | -0.676719 | 1.1326922 | 0.5720536 | 0.7009898 |
| Q8BGU2 | Cbln2    | 0.0931496 | 1.0908753 | 0.9343425 | 0.9048359 | 0.6520732 | 0.3672422 | 0.1261436 | 0.6209341 |
| P48758 | Cbr1     | -0.134093 | 0.4273933 | 0.7542629 | 0.8923639 | 0.2457198 | 0.3280157 | 0.4554821 | 0.6712964 |
| Q91VT4 | Cbr4     | 0.1504895 | 0.4373413 | 0.732619  | 0.8923639 | 0.194159  | 0.4856361 | 0.691802  | 0.7249553 |
| Q91WT9 | Cbs      | 0.2045329 | 0.2852608 | 0.4744241 | 0.8743196 | 0.1199527 | 0.3362859 | 0.7218583 | 0.7304131 |
| P23198 | Cbx3     | 0.2426799 | 0.4784012 | 0.6275504 | 0.8839759 | -0.46512  | 0.395984  | 0.2846592 | 0.6516893 |
| O55187 | Cbx4     | -1.294322 | 0.7814443 | 0.141627  | 0.8743196 | 0.2938617 | 0.3762395 | 0.4644655 | 0.6733118 |
| Q9DBY5 | Cbx6     | 0.3278846 | 1.2390274 | 0.7989167 | 0.8943678 | 0.0349309 | 0.8281069 | 0.9677226 | 0.7748325 |
| Q8BRN9 | Cc2d1b   | 0.7167844 | 0.4461695 | 0.1521929 | 0.8743196 | -2.950038 | 2.3642265 | 0.2586002 | 0.6500471 |
| Q8CFW7 | Cc2d2a   | -0.415559 | 0.4529663 | 0.3894382 | 0.8743196 | -0.219931 | 0.1933406 | 0.2986931 | 0.6540599 |
| Q8BTY1 | Ccbl1    | 0.0415007 | 0.6980656 | 0.9542545 | 0.9060514 | -1.561993 | 1.4593458 | 0.3256228 | 0.6594641 |
| Q71RI9 | Ccbl2    | -0.131639 | 0.2152793 | 0.5422301 | 0.8753373 | -0.352825 | 0.2359539 | 0.1383307 | 0.6209341 |
| Q810S1 | Ccdc109b | 0.1553751 | 0.5129426 | 0.7707625 | 0.8923639 | 0.4103268 | 0.3949655 | 0.3388966 | 0.6594641 |
| Q9D439 | Ccdc11   | -0.659962 | 1.2210676 | 0.605628  | 0.8792876 | 0.9633838 | 0.5258766 | 0.1166712 | 0.6209341 |
| Q3TVA9 | Ccdc136  | 0.812327  | 0.8080147 | 0.3482143 | 0.8743196 | 0.6709131 | 0.420333  | 0.1615686 | 0.6273856 |
| Q8R0K4 | Ccdc137  | 0.1584799 | 1.4302065 | 0.9148779 | 0.9048359 | 0.7472947 | 1.2257308 | 0.5644374 | 0.6997388 |
| F6V035 | Ccdc149  | -0.474392 | 0.5698819 | 0.4326402 | 0.8743196 | -1.225722 | 1.3341563 | 0.3936735 | 0.6617584 |
| Q8BSN3 | Ccdc151  | -0.433852 | 0.7059636 | 0.548059  | 0.8753373 | 0.277673  | 0.6239975 | 0.6636458 | 0.7215904 |
| Q8CE13 | Ccdc17   | 0.2365068 | 0.282159  | 0.4296048 | 0.8743196 | -0.860165 | 0.6100804 | 0.2082351 | 0.6429844 |
| Q8CDV0 | Ccdc178  | -0.9302   | 0.5554201 | 0.13789   | 0.8743196 | -1.357657 | 0.691087  | 0.0970844 | 0.6209341 |
| Q640L5 | Ccdc18   | 0.2192358 | 0.6815615 | 0.7570973 | 0.8923639 | 0.3647614 | 0.7670462 | 0.6512202 | 0.7191997 |

|        |          |           |           |           |           |           |           |           |           |
|--------|----------|-----------|-----------|-----------|-----------|-----------|-----------|-----------|-----------|
| Q80VN0 | Ccdc37   | 0.208693  | 1.0892931 | 0.8506361 | 0.8962775 | 1.7095683 | 0.9881877 | 0.1072827 | 0.6209341 |
| Q8BI79 | Ccdc40   | 1.250254  | 0.8458753 | 0.1829185 | 0.8743196 | -0.52686  | 1.2010211 | 0.6762505 | 0.7239064 |
| Q9D024 | Ccdc47   | 1.0962927 | 0.9209758 | 0.2727035 | 0.8743196 | -0.210757 | 1.4151596 | 0.8864901 | 0.7592752 |
| Q810U5 | Ccdc50   | -0.571032 | 0.5983498 | 0.3716948 | 0.8743196 | -1.018558 | 0.8325156 | 0.2670168 | 0.6500471 |
| Q8R3Q6 | Ccdc58   | 0.035336  | 0.3484352 | 0.9201013 | 0.9048359 | 0.4975837 | 0.3151345 | 0.1300324 | 0.6209341 |
| Q8VHI7 | Ccdc65   | 0.6367346 | 0.6387943 | 0.3520743 | 0.8743196 | 1.0819332 | 0.697184  | 0.1716803 | 0.6323131 |
| Q9D541 | Ccdc7    | -0.689112 | 0.9235611 | 0.4798813 | 0.8743196 | -0.029808 | 0.9477775 | 0.9759305 | 0.776185  |
| Q9D9B0 | Ccdc70   | 0.6346446 | 0.5548458 | 0.2903008 | 0.8743196 | 0.8119285 | 0.5186035 | 0.1684796 | 0.6323131 |
| Q8VEG0 | Ccdc71   | -1.417419 | 0.5955364 | 0.0488771 | 0.8743196 | -0.235091 | 0.2774596 | 0.4293253 | 0.6694352 |
| Q8R2G6 | Ccdc80   | 0.8007163 | 1.9587152 | 0.694906  | 0.8900083 | 1.7094574 | 1.9403529 | 0.4122124 | 0.6675611 |
| Q9D5W4 | Ccdc81   | -0.55386  | 0.4683432 | 0.2459614 | 0.8743196 | -0.253422 | 0.5037615 | 0.6190017 | 0.7091807 |
| Q4VA36 | Ccdc84   | 0.7279071 | 1.294004  | 0.5913105 | 0.8755703 | 1.5351011 | 0.923827  | 0.1476416 | 0.6209341 |
| Q8CDL9 | Ccdc87   | -0.173032 | 0.401718  | 0.6796165 | 0.8900083 | -1.352753 | 1.0221179 | 0.2338684 | 0.6442378 |
| Q5SNZ0 | Ccdc88a  | 0.3353799 | 0.7612918 | 0.6658281 | 0.8900083 | 0.5419498 | 0.6009949 | 0.3835905 | 0.6606339 |
| Q4QRL3 | Ccdc88b  | 0.5228978 | 0.5206738 | 0.3311744 | 0.8743196 | -0.935134 | 0.8188473 | 0.2740475 | 0.6500471 |
| Q8VDN4 | Ccdc92   | -0.301525 | 0.6462533 | 0.6549775 | 0.8900083 | -0.493371 | 0.9458117 | 0.6206104 | 0.7091807 |
| Q7TQK5 | Ccdc93   | -0.753592 | 0.7022896 | 0.3188414 | 0.8743196 | -1.590445 | 0.5757564 | 0.0327517 | 0.6209341 |
| Q9DBT3 | Ccdc97   | 0.2034343 | 0.5450889 | 0.7200352 | 0.8910745 | -0.957345 | 1.420697  | 0.5254974 | 0.69337   |
| P30280 | Ccnd2    | 0.2054028 | 0.5470462 | 0.7184255 | 0.8910745 | -0.046787 | 0.949474  | 0.9622978 | 0.7730074 |
| P30282 | Ccnd3    | 0.2560934 | 0.9495991 | 0.7951791 | 0.8943678 | 1.4731241 | 0.61816   | 0.0545386 | 0.6209341 |
| P51944 | Ccnf     | 0.0159831 | 0.496567  | 0.9752213 | 0.9072902 | 0.5676011 | 0.3289485 | 0.1351928 | 0.6209341 |
| O08918 | Ccng2    | -2.994338 | 1.3596555 | 0.0635172 | 0.8743196 | -0.424619 | 1.0716648 | 0.7056465 | 0.7280735 |
| Q7TSH4 | Ccp110   | -0.922456 | 0.7006702 | 0.2077573 | 0.8743196 | -0.185129 | 0.4415854 | 0.6818881 | 0.7239064 |
| Q640L3 | Ccpg1    | -0.092945 | 0.2031203 | 0.6611141 | 0.8900083 | -0.18907  | 0.1294192 | 0.1943426 | 0.6418859 |
| O35457 | Ccrl2    | -1.047011 | 1.5463036 | 0.5200807 | 0.8753373 | -0.012491 | 0.4739721 | 0.9798294 | 0.7762605 |
| Q9WU84 | Ccs      | -1.036639 | 1.0071036 | 0.319639  | 0.8743196 | 0.295017  | 0.3875594 | 0.4601134 | 0.6712964 |
| Q8QZT2 | Ccsap    | -0.160723 | 0.2108617 | 0.4708255 | 0.8743196 | -0.157286 | 0.0978826 | 0.1592039 | 0.6240755 |
| Q3UHI0 | Ccser2   | 0.2470896 | 0.7756523 | 0.7593565 | 0.8923639 | 0.1680187 | 0.5100007 | 0.753014  | 0.7375672 |
| P80314 | Cct2     | -0.131544 | 0.2827166 | 0.6426388 | 0.8891711 | -0.512096 | 0.2561682 | 0.0483998 | 0.6209341 |
| P80318 | Cct3     | -0.093796 | 0.1902249 | 0.6226734 | 0.8826986 | -0.624078 | 0.2272572 | 0.0068721 | 0.6209341 |
| P80315 | Cct4     | -0.103839 | 0.2353849 | 0.6599645 | 0.8900083 | -0.374403 | 0.2833132 | 0.1894382 | 0.6405321 |
| P80316 | Cct5     | -0.099623 | 0.254161  | 0.6958906 | 0.8900083 | 0.1569394 | 0.2382805 | 0.5118129 | 0.6874741 |
| P80317 | Cct6a    | 0.4633522 | 0.4211967 | 0.275011  | 0.8743196 | 0.2988248 | 0.4783883 | 0.5344934 | 0.695758  |
| Q61390 | Cct6b    | -0.303491 | 0.3266447 | 0.3837496 | 0.8743196 | -0.128872 | 0.1605219 | 0.4526918 | 0.6712964 |
| P80313 | Cct7     | -0.494337 | 0.3969914 | 0.2158807 | 0.8743196 | -0.578027 | 0.449961  | 0.2022231 | 0.6429844 |
| P42932 | Cct8     | 0.0580749 | 0.1782967 | 0.7450247 | 0.8923639 | -0.051406 | 0.174119  | 0.7682163 | 0.7405059 |
| Q80YT3 | Cct8l1   | 1.3629467 | 0.5416476 | 0.0400266 | 0.8743196 | 0.8979064 | 0.5946096 | 0.1817664 | 0.6395902 |
| Q8R422 | Cd109    | 0.0855441 | 1.0932163 | 0.9398191 | 0.9048359 | 0.0975795 | 0.9731564 | 0.9233956 | 0.7634944 |
| Q8R2S8 | Cd177    | -0.439489 | 0.3718745 | 0.2758636 | 0.8743196 | -0.262963 | 0.2191616 | 0.275418  | 0.6500471 |
| P08920 | Cd2      | -1.732611 | 1.2306821 | 0.2020014 | 0.8743196 | -2.027716 | 1.8977633 | 0.3263963 | 0.6594641 |
| Q5UKY4 | Cd200r3  | 0.8530109 | 1.5065518 | 0.5889404 | 0.8753373 | -1.260806 | 1.9849196 | 0.5487452 | 0.6980496 |
| Q64314 | Cd34     | 0.8384023 | 1.3072258 | 0.5417108 | 0.8753373 | 0.5481849 | 1.4012797 | 0.7091617 | 0.7287552 |
| Q08857 | Cd36     | -1.231388 | 0.6672264 | 0.0778735 | 0.8743196 | -1.161155 | 0.4623846 | 0.0207299 | 0.6209341 |
| P56528 | Cd38     | -0.553203 | 0.5206917 | 0.32331   | 0.8743196 | -0.524561 | 0.4828678 | 0.3190316 | 0.6594641 |
| A2APM5 | Cd44     | -0.551702 | 0.5745249 | 0.3689041 | 0.8743196 | -1.862966 | 0.8035264 | 0.0595723 | 0.6209341 |
| P15379 | Cd44     | -0.041448 | 0.9192191 | 0.9652948 | 0.9067461 | 1.1769446 | 0.574413  | 0.0863673 | 0.6209341 |
| Q61735 | Cd47     | 1.6262495 | 0.6777513 | 0.0475026 | 0.8743196 | 0.7376005 | 0.8432816 | 0.415384  | 0.6676091 |
| P13379 | Cd5      | -1.262128 | 1.006687  | 0.2501829 | 0.8743196 | 0.4069211 | 0.4550324 | 0.4056192 | 0.6646266 |
| Q61451 | Cd53     | 0.6791053 | 1.0522235 | 0.5392386 | 0.8753373 | -0.03755  | 1.6271503 | 0.982337  | 0.776946  |
| Q61475 | Cd55     | 1.6785867 | 0.7314323 | 0.0554034 | 0.8743196 | 0.3645845 | 0.8647851 | 0.6880113 | 0.72435   |
| P37217 | Cd69     | 0.8630632 | 1.2105328 | 0.4989408 | 0.8752932 | 1.0759874 | 1.2391369 | 0.4185831 | 0.6694352 |
| P50283 | Cd7      | -1.055384 | 0.53846   | 0.090819  | 0.8743196 | -0.589336 | 0.6214622 | 0.3795871 | 0.6601864 |
| Q8BIF0 | Cd99l2   | 0.1988235 | 0.7913158 | 0.8088318 | 0.8943678 | 0.9434501 | 0.9567564 | 0.3621677 | 0.6594641 |
| Q8CC12 | Cdan1    | 0.1694288 | 0.6448051 | 0.8003015 | 0.8943678 | 0.1283789 | 0.7596129 | 0.8713459 | 0.7571111 |
| Q61081 | Cdc37    | 0.0825732 | 0.3424426 | 0.8105032 | 0.8943678 | 0.0119312 | 0.3314782 | 0.9714619 | 0.7751875 |
| Q9DC48 | Cdc40    | 1.871818  | 1.5449182 | 0.2649746 | 0.8743196 | 2.168487  | 1.5108423 | 0.201215  | 0.6429844 |
| P60766 | Cdc42    | 0.4304729 | 0.472956  | 0.3697531 | 0.8743196 | 0.2589316 | 0.4887987 | 0.6006281 | 0.7065519 |
| Q3UU96 | Cdc42bpa | -0.159418 | 0.2653282 | 0.5668898 | 0.8753373 | -0.146902 | 0.1192557 | 0.2640977 | 0.6500471 |
| Q9Z0H0 | Cdc7     | -0.263751 | 1.0627833 | 0.8111256 | 0.8943678 | 0.6718582 | 0.5660927 | 0.2801493 | 0.6506857 |
| Q99M54 | Cdca3    | -0.058705 | 0.6939776 | 0.9337049 | 0.9048359 | -0.931503 | 0.9055823 | 0.3224159 | 0.6594641 |
| P09803 | Cdh1     | -0.625987 | 0.4359103 | 0.1644517 | 0.8743196 | -0.674917 | 0.4166073 | 0.1208865 | 0.6209341 |

|        |            |           |           |           |           |           |           |           |           |
|--------|------------|-----------|-----------|-----------|-----------|-----------|-----------|-----------|-----------|
| P55288 | Cdh11      | -0.620266 | 0.3778129 | 0.1446503 | 0.8743196 | 0.3402287 | 0.5474942 | 0.5571746 | 0.6980496 |
| Q9WTR5 | Cdh13      | 0.2285472 | 0.4250357 | 0.5929444 | 0.8768084 | 0.6197005 | 0.3303902 | 0.0667906 | 0.6209341 |
| Q99PF4 | Cdh23      | 1.7821476 | 1.7457022 | 0.3412919 | 0.8743196 | 1.3103018 | 1.867239  | 0.5091366 | 0.6853401 |
| P10287 | Cdh3       | -1.77349  | 1.0041214 | 0.0976986 | 0.8743196 | -0.49994  | 0.4822841 | 0.3188159 | 0.6594641 |
| Q8BL00 | Cdhr3      | 0.0188214 | 0.5553477 | 0.9739101 | 0.9072902 | -1.854356 | 1.4028529 | 0.2343793 | 0.6442378 |
| P11440 | Cdk1       | -0.239253 | 0.3716096 | 0.5401996 | 0.8753373 | -1.003587 | 0.4728673 | 0.0780303 | 0.6209341 |
| Q3UMM4 | Cdk10      | 0.3113241 | 1.0684111 | 0.7791986 | 0.8940257 | 1.0255826 | 1.1649692 | 0.4125383 | 0.6675611 |
| Q69ZA1 | Cdk13      | 0.9298195 | 0.8462074 | 0.3082016 | 0.8743196 | 1.7309545 | 0.5668288 | 0.0224038 | 0.6209341 |
| O35495 | Cdk14      | -0.843814 | 1.1053089 | 0.4701559 | 0.8743196 | 0.4826855 | 0.9345237 | 0.6239795 | 0.7111404 |
| Q8BWD8 | Cdk19      | -0.340122 | 0.3428811 | 0.3542636 | 0.8743196 | -0.365401 | 0.1425754 | 0.0427437 | 0.6209341 |
| Q99J95 | Cdk9       | -0.41872  | 0.3603818 | 0.283364  | 0.8743196 | -1.645801 | 1.9681371 | 0.4350613 | 0.6699704 |
| Q91WE6 | Cdkal1     | 0.2621433 | 0.5928048 | 0.6716784 | 0.8900083 | -0.600284 | 1.0147146 | 0.5757272 | 0.7015295 |
| Q9QUK0 | Cdkl2      | 1.2530751 | 0.9352928 | 0.2221795 | 0.8743196 | 0.3452755 | 1.2935462 | 0.7984666 | 0.7439428 |
| P46414 | Cdkn1b     | -0.014058 | 0.2340271 | 0.9537785 | 0.9060514 | -0.032324 | 0.1382321 | 0.8228868 | 0.7490596 |
| Q9D211 | Cdkn2aipnl | 0.0035933 | 0.430946  | 0.9935798 | 0.9101701 | 0.022219  | 0.2380333 | 0.928669  | 0.7645476 |
| P60334 | Cdo1       | 0.725254  | 0.617377  | 0.2584134 | 0.8743196 | 0.7676931 | 0.6493764 | 0.258299  | 0.6500471 |
| Q4VAA2 | Cdv3       | -0.565641 | 0.2837727 | 0.0582224 | 0.8743196 | -0.812428 | 0.552499  | 0.1569954 | 0.6211692 |
| P18111 | Cdx1       | -1.253755 | 0.385693  | 0.0140446 | 0.8743196 | -0.530796 | 0.8529618 | 0.5566401 | 0.6980496 |
| Q3UKK2 | Ceacam5    | 1.6562091 | 1.7154244 | 0.3664666 | 0.8743196 | 0.6217339 | 2.0836909 | 0.7754759 | 0.7428116 |
| Q00322 | Cebpd      | 0.3409725 | 0.6033836 | 0.5896488 | 0.8753373 | -1.573366 | 0.6598385 | 0.0544351 | 0.6209341 |
| Q91WM2 | Cecr5      | -0.04083  | 0.6045954 | 0.9470491 | 0.9060514 | -0.231286 | 0.8553477 | 0.791098  | 0.7439428 |
| P28659 | Celf1      | -1.767667 | 2.1814836 | 0.4444351 | 0.8743196 | -0.827265 | 0.8402235 | 0.362854  | 0.6594641 |
| Q9R0M0 | Celsr2     | -0.06898  | 1.1438276 | 0.9535975 | 0.9060514 | 0.7061312 | 1.1452282 | 0.5601597 | 0.6986486 |
| Q6RT24 | Cenpe      | 0.042747  | 0.431721  | 0.9219841 | 0.9048359 | -0.378135 | 0.3853188 | 0.3381397 | 0.6594641 |
| Q9QYM8 | Cenph      | 0.8045509 | 0.5434382 | 0.1822899 | 0.8743196 | -0.006679 | 0.5249031 | 0.9902599 | 0.7779037 |
| Q80V31 | Cep104     | 0.9874086 | 0.7178661 | 0.2113837 | 0.8743196 | 1.101956  | 0.8292167 | 0.2321777 | 0.6442378 |
| Q7TSG1 | Cep120     | -0.339111 | 1.3269238 | 0.8056362 | 0.8943678 | 1.0821429 | 1.4335024 | 0.4788853 | 0.6788349 |
| Q8BI22 | Cep128     | -0.403383 | 1.2787239 | 0.7567605 | 0.8923639 | 0.0094202 | 0.5898751 | 0.987501  | 0.7775007 |
| Q5DU05 | Cep164     | 0.8468331 | 0.5416106 | 0.1618995 | 0.8743196 | 1.1024943 | 0.6127875 | 0.1220967 | 0.6209341 |
| Q6A065 | Cep170     | -0.580464 | 0.6869122 | 0.4260282 | 0.8743196 | -0.050449 | 0.711042  | 0.9457424 | 0.769669  |
| Q6A078 | Cep290     | 0.0969047 | 0.3678553 | 0.7958024 | 0.8943678 | -0.876025 | 0.4375981 | 0.0666141 | 0.6209341 |
| Q5HZK1 | Cep44      | -1.351675 | 1.1776872 | 0.288785  | 0.8743196 | -0.902378 | 0.5290691 | 0.138962  | 0.6209341 |
| Q0VEJ0 | Cep76      | 0.6505611 | 0.8082463 | 0.4473469 | 0.8743196 | -0.904378 | 1.2296042 | 0.489774  | 0.6803412 |
| Q6IRU7 | Cep78      | 0.2661018 | 0.7279841 | 0.7255097 | 0.8910745 | 0.710679  | 0.4090429 | 0.1329841 | 0.6209341 |
| P27545 | Cers1      | 0.0063398 | 0.9354399 | 0.9947816 | 0.9101811 | 0.4012306 | 1.0837252 | 0.7239268 | 0.730562  |
| Q8C172 | Cers6      | -0.101984 | 0.1266256 | 0.4470794 | 0.8743196 | -0.177867 | 0.0833498 | 0.076786  | 0.6209341 |
| Q8VCC2 | Ces1       | -0.314315 | 0.3583625 | 0.3822067 | 0.8743196 | -0.076014 | 0.3951399 | 0.8478259 | 0.7536454 |
| P23953 | Ces1c      | -0.261357 | 0.2419114 | 0.282706  | 0.8743196 | -0.041173 | 0.2804929 | 0.8836561 | 0.7585208 |
| Q8VCT4 | Ces1d      | -0.212761 | 0.1858348 | 0.2536855 | 0.8743196 | -0.026464 | 0.1697153 | 0.8762738 | 0.7581843 |
| Q64176 | Ces1e      | -0.146445 | 0.3128066 | 0.6411006 | 0.8891711 | 0.1113244 | 0.3206942 | 0.7296651 | 0.7324246 |
| Q8QZR3 | Ces2a      | -0.351927 | 0.3749186 | 0.3576511 | 0.8743196 | -0.681032 | 0.5146731 | 0.2006873 | 0.6429844 |
| Q63880 | Ces3a      | 0.210125  | 0.3102579 | 0.5004423 | 0.8753373 | 0.1041236 | 0.3329798 | 0.7555561 | 0.7380125 |
| Q8VCU1 | Ces3b      | 0.2218584 | 0.4159831 | 0.5968282 | 0.8770074 | 0.4833181 | 0.3301294 | 0.1523721 | 0.6211692 |
| Q6AW46 | Ces5a      | 0.5212416 | 0.4517858 | 0.2666609 | 0.8743196 | 0.6536561 | 0.5005975 | 0.214272  | 0.6429844 |
| Q9D998 | Ces5a      | 1.2542541 | 0.4657239 | 0.0309453 | 0.8743196 | 0.8263813 | 0.4775897 | 0.1342962 | 0.6209341 |
| P41209 | Cetn1      | 2.1253907 | 2.1897522 | 0.3640782 | 0.8743196 | 1.3405064 | 2.5050682 | 0.6118101 | 0.7082928 |
| P04186 | Cfb        | -0.448962 | 0.8868567 | 0.6162701 | 0.8816458 | 0.2572595 | 0.6262892 | 0.6844845 | 0.724036  |
| P03953 | Cfd        | -0.407594 | 0.6081487 | 0.524204  | 0.8753373 | -1.481062 | 1.2306473 | 0.2741141 | 0.6500471 |
| P06909 | Cfh        | 1.12653   | 0.7430106 | 0.1732579 | 0.8743196 | 1.0143617 | 0.8606161 | 0.2831593 | 0.6508436 |
| Q61129 | Cfi        | -0.720281 | 0.4097317 | 0.0920616 | 0.8743196 | -0.841548 | 0.748653  | 0.274289  | 0.6500471 |
| P18760 | Cfl1       | 0.268054  | 0.2097561 | 0.2046727 | 0.8743196 | -0.064737 | 0.2288228 | 0.7780116 | 0.7428116 |
| P45591 | Cfl2       | 0.1388314 | 0.261935  | 0.5974464 | 0.8770074 | 0.0465538 | 0.3075758 | 0.880095  | 0.7585208 |
| P11680 | Cfp        | 0.6118559 | 0.745549  | 0.4388794 | 0.8743196 | -1.224762 | 0.9105546 | 0.2272117 | 0.6442378 |
| P26361 | Cftr       | -0.484401 | 0.4989273 | 0.3417057 | 0.8743196 | -0.987452 | 0.6421484 | 0.1397854 | 0.6209341 |
| Q6AW69 | Cgnl1      | 0.4640586 | 1.1029088 | 0.6865479 | 0.8900083 | -1.005547 | 1.5295938 | 0.535317  | 0.695758  |
| Q9D1L0 | Chchd2     | 0.3077034 | 0.4421784 | 0.493476  | 0.8748057 | -0.269582 | 0.6634237 | 0.6888008 | 0.72435   |
| Q9CRB9 | Chchd3     | -0.340328 | 0.4714159 | 0.4733973 | 0.8743196 | -0.073444 | 0.387711  | 0.850555  | 0.7537615 |
| Q91VN4 | Chchd6     | -0.648358 | 1.0232579 | 0.5464657 | 0.8753373 | 0.122604  | 0.6048764 | 0.8460739 | 0.7532788 |
| Q8K2Q5 | Chchd7     | 0.4242731 | 0.5265641 | 0.4468962 | 0.8743196 | -0.754033 | 0.9468734 | 0.4561784 | 0.6712964 |
| P40201 | Chd1       | 0.9013979 | 0.6635979 | 0.2165027 | 0.8743196 | -0.385493 | 0.6628147 | 0.5820121 | 0.7035706 |
| Q9CXF7 | Chd1l      | 0.506457  | 0.9332701 | 0.6041973 | 0.8792876 | -1.097115 | 1.3837131 | 0.4580459 | 0.6712964 |

|        |          |           |           |           |           |           |           |           |           |
|--------|----------|-----------|-----------|-----------|-----------|-----------|-----------|-----------|-----------|
| A2AJK6 | Chd7     | -0.13567  | 0.3158418 | 0.6804344 | 0.8900083 | -0.408318 | 0.2655403 | 0.1750409 | 0.6347112 |
| Q8BJ64 | Chdh     | -0.170747 | 0.4040819 | 0.6749401 | 0.8900083 | -0.363947 | 0.4594229 | 0.4337463 | 0.6697843 |
| Q8CGZ0 | Cherp    | -0.323766 | 0.2546112 | 0.2441292 | 0.8743196 | -0.257995 | 0.2448133 | 0.3325309 | 0.6594641 |
| Q922Q9 | Chid1    | 0.0658968 | 0.9090511 | 0.94424   | 0.9057704 | 0.2905962 | 0.7304329 | 0.7045162 | 0.7279571 |
| Q9D7Q1 | Chit1    | 1.2001258 | 0.5343118 | 0.0595383 | 0.8743196 | 0.029625  | 1.0803573 | 0.9790129 | 0.7762206 |
| D6RG40 | Chka     | 0.3397312 | 1.4459705 | 0.8209722 | 0.8943678 | 0.8017458 | 1.5345755 | 0.6200749 | 0.7091807 |
| Q9QXG2 | Chm      | -0.670121 | 2.3122194 | 0.7803527 | 0.8940257 | 1.321894  | 0.9057681 | 0.1947381 | 0.6418859 |
| Q3TJ28 | Chmp1b   | 0.4838003 | 0.8983274 | 0.6068859 | 0.8792876 | -0.583388 | 1.3939273 | 0.6901334 | 0.724834  |
| Q9D8B3 | Chmp4b   | -0.494358 | 0.6707132 | 0.4724564 | 0.8743196 | -1.764552 | 0.6024434 | 0.0117361 | 0.6209341 |
| Q80XD1 | Chn2     | -0.354446 | 0.88591   | 0.7010169 | 0.8901989 | -0.439042 | 1.3602868 | 0.7578305 | 0.7380771 |
| Q9D1P4 | Chordc1  | -0.643614 | 0.4551505 | 0.167307  | 0.8743196 | -0.726009 | 0.5146688 | 0.1697707 | 0.6323131 |
| Q6IQX7 | Chpf     | 0.2679136 | 0.6745243 | 0.7030603 | 0.8907355 | 0.3115508 | 0.616887  | 0.6315424 | 0.7120542 |
| P12657 | Chrm1    | -0.154869 | 1.6861126 | 0.9293908 | 0.9048359 | 1.5463811 | 1.088396  | 0.2051998 | 0.6429844 |
| Q9ERZ3 | Chrm3    | 0.4572833 | 0.8066623 | 0.5885013 | 0.8753373 | 0.7689535 | 0.62845   | 0.2669813 | 0.6500471 |
| P02716 | Chrnd    | -0.895457 | 0.6372499 | 0.2027572 | 0.8743196 | -0.054503 | 0.373169  | 0.8886611 | 0.7592752 |
| Q99KN2 | Ciao1    | -0.229623 | 0.665559  | 0.7402233 | 0.8923639 | 0.2684311 | 0.5699045 | 0.6542701 | 0.7198872 |
| Q8WTY4 | Ciapi1   | 0.2712074 | 0.438227  | 0.5420808 | 0.8753373 | 0.4693622 | 0.3452395 | 0.1891119 | 0.6405321 |
| Q9Z0F4 | Cib1     | 0.2586387 | 0.4965702 | 0.6185363 | 0.8816934 | -0.431388 | 0.7540476 | 0.5880341 | 0.7049451 |
| D3Z7H8 | Cilp2    | 0.2386327 | 0.9509306 | 0.8090624 | 0.8943678 | 0.4552741 | 0.8327767 | 0.6043089 | 0.7080081 |
| Q9D0V8 | Cinp     | 0.1305683 | 0.4311994 | 0.7708406 | 0.8923639 | 0.1135368 | 0.4008976 | 0.7865361 | 0.7439428 |
| Q9DA19 | Cir1     | -0.636381 | 1.5078496 | 0.6856518 | 0.8900083 | 0.3384517 | 1.5695877 | 0.8364188 | 0.7519044 |
| Q91WS0 | Cisd1    | 0.2074339 | 0.4009321 | 0.6085639 | 0.8792876 | -0.583913 | 0.7401132 | 0.437014  | 0.6699704 |
| Q3V1H1 | Ckap2    | 0.2267224 | 0.4235041 | 0.6089877 | 0.8792876 | 0.2281332 | 0.3852005 | 0.5753095 | 0.7015295 |
| Q8BMK4 | Ckap4    | -0.686263 | 0.6712794 | 0.3406544 | 0.8743196 | -2.067012 | 1.4738972 | 0.2103558 | 0.6429844 |
| A2AGT5 | Ckap5    | 0.7162997 | 0.8092411 | 0.3900447 | 0.8743196 | 0.8173101 | 0.8896635 | 0.3749974 | 0.6594641 |
| Q04447 | Ckb      | -0.184997 | 0.3154792 | 0.5597012 | 0.8753373 | -0.442076 | 0.3892439 | 0.2609946 | 0.6500471 |
| P07310 | Ckm      | -0.074838 | 0.1300727 | 0.5655441 | 0.8753373 | -0.34562  | 0.1485103 | 0.0208214 | 0.6209341 |
| Q6P8J7 | Ckmt2    | 0.0284357 | 0.2421187 | 0.9066554 | 0.9048359 | 0.5317977 | 0.2774221 | 0.0572993 | 0.6209341 |
| Q80TV8 | Clasp1   | 0.5523961 | 1.7208992 | 0.757587  | 0.8923639 | 1.7213657 | 1.8327767 | 0.3838753 | 0.6606339 |
| Q9ET38 | Cldn19   | 0.4966208 | 0.6543525 | 0.4726593 | 0.8743196 | -1.170996 | 1.1187324 | 0.3355532 | 0.6594641 |
| Q9Z261 | Cldn7    | 0.104049  | 0.3559891 | 0.7740754 | 0.8935551 | -0.414311 | 0.4500377 | 0.3740198 | 0.6594641 |
| Q8VCP9 | Clec14a  | 0.4626684 | 0.5510524 | 0.4288675 | 0.8743196 | -0.425998 | 1.0472366 | 0.6982803 | 0.7265263 |
| Q7TSQ1 | Clec18a  | -0.7701   | 1.725364  | 0.6688317 | 0.8900083 | -2.523107 | 1.5936656 | 0.1644625 | 0.6276894 |
| Q67DU8 | Clec4b2  | -0.458834 | 0.7486421 | 0.559328  | 0.8753373 | -0.92479  | 1.2806017 | 0.4973683 | 0.6823283 |
| P52194 | Clgn     | -1.544891 | 0.7983979 | 0.0942278 | 0.8743196 | 0.0131606 | 0.2904652 | 0.9653315 | 0.7737411 |
| Q5M6W3 | Clhc1    | -0.163208 | 1.0879802 | 0.8849876 | 0.9006736 | 1.0188003 | 1.0022062 | 0.3485894 | 0.6594641 |
| Q9QYB1 | Clic4    | -0.027106 | 0.3919763 | 0.9457828 | 0.9060514 | 0.4954799 | 0.1926778 | 0.0232257 | 0.6209341 |
| Q8BHB9 | Clic6    | -1.342298 | 0.4362627 | 0.0178954 | 0.8743196 | -0.056096 | 0.3662682 | 0.8832964 | 0.7585208 |
| Q99KN9 | Clint1   | -0.728781 | 0.5916453 | 0.2369907 | 0.8743196 | -0.628016 | 0.4181535 | 0.1570236 | 0.6211692 |
| Q922J3 | Clip1    | 0.2630061 | 0.278366  | 0.3471471 | 0.8743196 | 0.3371793 | 0.2728363 | 0.220008  | 0.6434585 |
| Q9Z0H8 | Clip2    | -0.677612 | 0.7022408 | 0.3667246 | 0.8743196 | -0.218391 | 0.7711665 | 0.7865436 | 0.7439428 |
| B9EHT4 | Clip3    | -0.499987 | 0.7750005 | 0.5393949 | 0.8753373 | -0.46748  | 0.3830629 | 0.2681053 | 0.6500471 |
| O35492 | Clk3     | 2.5711755 | 2.9131995 | 0.4067414 | 0.8743196 | 2.3641251 | 2.3628194 | 0.3556711 | 0.6594641 |
| O88696 | Clpp     | 0.6191716 | 0.3115156 | 0.0512055 | 0.8743196 | 0.4661317 | 0.3530406 | 0.1921917 | 0.6418859 |
| Q9JHS4 | Clpx     | -0.554401 | 0.4167063 | 0.1964166 | 0.8743196 | -0.077382 | 0.5214941 | 0.8835252 | 0.7585208 |
| O08585 | CltA     | -0.06536  | 0.7967841 | 0.9353329 | 0.9048359 | 0.502443  | 0.8123776 | 0.5432363 | 0.6979269 |
| Q6IRU5 | Cltb     | -0.002337 | 0.2370857 | 0.9921697 | 0.9096681 | -1.224379 | 0.3775352 | 0.0021543 | 0.5840626 |
| Q68FD5 | Cltc     | 0.1721237 | 0.1701744 | 0.3125849 | 0.8743196 | -0.08976  | 0.1996516 | 0.6533707 | 0.7198872 |
| Q06890 | Clu      | 0.0097126 | 0.31743   | 0.9756762 | 0.9072902 | 0.0409287 | 0.3550865 | 0.9086084 | 0.7612577 |
| Q5SW19 | Cluh     | 0.3710103 | 0.2413665 | 0.1273293 | 0.8743196 | 0.1745333 | 0.2416004 | 0.4719186 | 0.6770544 |
| Q8BG92 | Clvs2    | -0.259136 | 0.2409752 | 0.3178745 | 0.8743196 | -0.310746 | 0.1655215 | 0.109553  | 0.6209341 |
| Q8R4N0 | Clybl    | -0.137261 | 0.2464477 | 0.5786027 | 0.8753373 | -0.349639 | 0.299619  | 0.2459012 | 0.6500471 |
| Q61419 | Cmah     | -0.352842 | 0.4758674 | 0.4659118 | 0.8743196 | 0.2528951 | 0.4676495 | 0.5946322 | 0.7056501 |
| Q99KK2 | Cmas     | -0.287098 | 0.5913908 | 0.6421734 | 0.8891711 | -1.580931 | 0.5163426 | 0.0221742 | 0.6209341 |
| Q8R1G2 | Cmb1     | -0.085094 | 0.3791972 | 0.8228544 | 0.8943678 | -0.087096 | 0.4152865 | 0.8343228 | 0.7519044 |
| Q9JIZ0 | Cml1     | 0.1120867 | 0.4087951 | 0.7876801 | 0.8943678 | -0.205855 | 0.8107373 | 0.8035362 | 0.7451577 |
| Q8CHQ9 | Cml2     | 0.0582381 | 1.7672025 | 0.9746305 | 0.9072902 | -1.254233 | 2.1531768 | 0.5814413 | 0.7031064 |
| Q9DBP5 | Cmpk1    | 0.8938516 | 0.5326254 | 0.0972602 | 0.8743196 | 0.3024487 | 0.5981317 | 0.61471   | 0.7084882 |
| Q3U5Q7 | Cmpk2    | -0.125314 | 0.1604637 | 0.4604209 | 0.8743196 | -0.231127 | 0.165248  | 0.2114216 | 0.6429844 |
| Q70KF4 | Cmya5    | -0.74208  | 0.9307807 | 0.4514877 | 0.8743196 | 0.0452897 | 0.4673168 | 0.9259505 | 0.7634944 |
| F8VQ66 | CN725425 | -0.205494 | 0.45679   | 0.6664076 | 0.8900083 | -0.420589 | 0.34678   | 0.2707706 | 0.6500471 |

|        |          |           |           |           |           |           |           |           |           |
|--------|----------|-----------|-----------|-----------|-----------|-----------|-----------|-----------|-----------|
| Q9D5U8 | Cnbd2    | -1.024201 | 1.1423215 | 0.3997175 | 0.8743196 | -1.402359 | 1.1328158 | 0.2619788 | 0.6500471 |
| P53996 | Cnbp     | -0.645359 | 0.3725936 | 0.0898198 | 0.8743196 | -0.479776 | 0.3450482 | 0.171891  | 0.6323131 |
| Q9D1A2 | Cndp2    | -0.007436 | 0.2629077 | 0.9775078 | 0.9072902 | -0.38098  | 0.345779  | 0.2743761 | 0.6500471 |
| Q62398 | Cnga2    | -0.846792 | 0.5885805 | 0.1934055 | 0.8743196 | 0.0976879 | 0.6764098 | 0.8898968 | 0.7592752 |
| Q9JJZ8 | Cnga3    | 0.4610482 | 0.7913326 | 0.568803  | 0.8753373 | 0.1543868 | 0.820966  | 0.8537372 | 0.7542822 |
| Q0GA42 | Cnnm1    | -0.162257 | 0.3174038 | 0.6249358 | 0.8826986 | -0.163868 | 0.1384657 | 0.2813879 | 0.6506857 |
| Q6ZQ08 | Cnot1    | 0.9421511 | 0.7068059 | 0.202435  | 0.8743196 | -0.741502 | 0.9165481 | 0.4330638 | 0.6697843 |
| Q8K3P5 | Cnot6    | 0.3793233 | 0.8419243 | 0.6659424 | 0.8900083 | -0.371849 | 1.0203104 | 0.728024  | 0.7323934 |
| Q8K158 | Cnppd1   | 1.0521576 | 1.472057  | 0.4978991 | 0.8748057 | 2.4275445 | 1.2942135 | 0.1098091 | 0.6209341 |
| Q9QXT0 | Cnpy2    | 0.543622  | 0.392387  | 0.1737961 | 0.8743196 | 0.0089879 | 0.4280571 | 0.9833708 | 0.7770843 |
| Q9DAU1 | Cnpy3    | -1.744058 | 1.2827872 | 0.21613   | 0.8743196 | -1.043283 | 0.5081469 | 0.0858712 | 0.6209341 |
| Q9D995 | Cntd1    | 0.9883239 | 0.3965653 | 0.0414622 | 0.8743196 | -0.187552 | 0.4193356 | 0.6703803 | 0.7227095 |
| O88507 | Cntfr    | -0.02175  | 1.2558824 | 0.986666  | 0.9080307 | 0.8255324 | 1.3105066 | 0.5519564 | 0.6980496 |
| Q61330 | Cntn2    | 0.8460267 | 1.379998  | 0.5592182 | 0.8753373 | 2.3453515 | 0.8549739 | 0.0335936 | 0.6209341 |
| Q69Z26 | Cntn4    | -0.243935 | 1.5564821 | 0.8798882 | 0.9006736 | 0.9792413 | 1.0613633 | 0.391793  | 0.6614566 |
| P68500 | Cntn5    | -0.562662 | 1.4893197 | 0.7167755 | 0.8910745 | 1.904167  | 0.7375619 | 0.0416739 | 0.6209341 |
| Q9JMB8 | Cntn6    | -0.228934 | 0.4081365 | 0.5923419 | 0.8765071 | -0.387309 | 0.202067  | 0.1037346 | 0.6209341 |
| O54991 | Cntnap1  | 0.0611266 | 0.3500544 | 0.8637131 | 0.8974757 | -1.422612 | 0.7911782 | 0.0954139 | 0.6209341 |
| Q0V8T8 | Cntnap5b | 0.2333408 | 0.2869172 | 0.4428427 | 0.8743196 | -0.282967 | 0.6233956 | 0.6658479 | 0.7215904 |
| A2AL36 | Cntrl    | 0.1169861 | 0.7935304 | 0.8869532 | 0.9006736 | 1.3189864 | 0.7547786 | 0.1311406 | 0.6209341 |
| Q9DBL7 | Coasy    | 0.1627938 | 0.366339  | 0.6582905 | 0.8900083 | -0.174007 | 0.4468821 | 0.698498  | 0.7265263 |
| Q3UMF0 | Cobl1    | -0.175415 | 0.4034515 | 0.6699073 | 0.8900083 | -0.930268 | 0.7046435 | 0.2095431 | 0.6429844 |
| Q62507 | Coch     | -1.799401 | 2.0099409 | 0.4003885 | 0.8743196 | -0.288985 | 1.3249735 | 0.8345753 | 0.7519044 |
| Q8C0L8 | Cog5     | 0.0902177 | 0.5281013 | 0.8666373 | 0.898064  | 0.570746  | 0.5985901 | 0.3577386 | 0.6594641 |
| Q64739 | Col11a2  | 0.7121404 | 0.7045317 | 0.3457686 | 0.8743196 | 0.8423165 | 1.0227149 | 0.4416622 | 0.6699704 |
| Q60847 | Col12a1  | -0.038455 | 0.4970162 | 0.93935   | 0.9048359 | 0.0838294 | 0.4954082 | 0.8682339 | 0.7571111 |
| Q8BLX7 | Col16a1  | 1.2933419 | 0.49676   | 0.0352423 | 0.8743196 | 0.2199035 | 1.1829127 | 0.8586488 | 0.7556239 |
| P39061 | Col18a1  | -1.922801 | 1.1444339 | 0.1368209 | 0.8743196 | -0.706742 | 0.9008848 | 0.4625874 | 0.6728653 |
| E9Q7P1 | Col22a1  | -0.005991 | 0.1202071 | 0.9616441 | 0.9067461 | -0.173725 | 0.1159521 | 0.1847216 | 0.6405321 |
| P28481 | Col2a1   | -0.045098 | 0.3614285 | 0.9015053 | 0.9036268 | -0.148415 | 0.3621071 | 0.6851391 | 0.724036  |
| P08121 | Col3a1   | -1.255171 | 0.8775818 | 0.1957236 | 0.8743196 | -0.273477 | 0.7906557 | 0.7412332 | 0.7346307 |
| P02463 | Col4a1   | 0.3264356 | 0.2556479 | 0.2210526 | 0.8743196 | -0.524769 | 0.2447601 | 0.0515163 | 0.6209341 |
| P08122 | Col4a2   | -0.094426 | 0.7983578 | 0.9074193 | 0.9048359 | 0.4951718 | 0.437468  | 0.2781223 | 0.650077  |
| Q9EQG9 | Col4a3bp | -1.059981 | 1.0015802 | 0.3250621 | 0.8743196 | -1.430278 | 1.403722  | 0.3475544 | 0.6594641 |
| Q9QZR9 | Col4a4   | -0.371273 | 0.400719  | 0.3850087 | 0.8743196 | -0.727109 | 0.6020692 | 0.2726093 | 0.6500471 |
| O88207 | Col5a1   | -0.829757 | 0.4812815 | 0.0981148 | 0.8743196 | -0.822074 | 0.5801174 | 0.1718492 | 0.6323131 |
| Q9JLI2 | Col5a3   | 1.0235479 | 0.7104759 | 0.1928735 | 0.8743196 | 0.2079341 | 0.8251354 | 0.809451  | 0.7465637 |
| Q04857 | Col6a1   | -0.293195 | 0.9982516 | 0.7774981 | 0.8940257 | 0.1589863 | 0.2960342 | 0.6105518 | 0.7082928 |
| A2AX52 | Col6a4   | 0.1326231 | 1.2118462 | 0.9159256 | 0.9048359 | 0.253444  | 1.0357976 | 0.8148536 | 0.7474231 |
| A6H584 | Col6a5   | 0.1295476 | 0.9599934 | 0.8944485 | 0.9008587 | -0.07145  | 1.1359059 | 0.9508017 | 0.7706093 |
| Q63870 | Col7a1   | 0.6365846 | 0.6999608 | 0.3933446 | 0.8743196 | -0.131039 | 0.8508397 | 0.8826502 | 0.7585208 |
| Q05722 | Col9a1   | -0.708371 | 0.7633558 | 0.3681159 | 0.8743196 | -0.4523   | 0.720512  | 0.5410393 | 0.6979269 |
| Q8CEP0 | Col9a1   | 2.7149709 | 3.1116175 | 0.4118477 | 0.8743196 | 2.2311023 | 3.535822  | 0.5513046 | 0.6980496 |
| Q07643 | Col9a2   | -0.365804 | 0.3376737 | 0.3145706 | 0.8743196 | -0.504311 | 0.1064044 | 0.0031929 | 0.5840626 |
| Q8K4Q8 | Colec12  | 0.4132726 | 0.5775533 | 0.4974321 | 0.8748057 | 0.2499768 | 0.7626917 | 0.7542308 | 0.7379888 |
| Q8JZY2 | Commmd10 | 0.8081281 | 0.7318085 | 0.305975  | 0.8743196 | 0.5475349 | 0.737056  | 0.485619  | 0.6796099 |
| O88587 | Comt     | 0.0401016 | 0.2231267 | 0.857828  | 0.897347  | 0.0063257 | 0.2547622 | 0.9802623 | 0.7762605 |
| Q8BIG7 | Comtd1   | 0.5240669 | 0.765272  | 0.5154902 | 0.8753373 | -0.441533 | 1.3300004 | 0.7511949 | 0.7375672 |
| Q8CIE6 | Copa     | -0.316683 | 0.2106967 | 0.1344169 | 0.8743196 | -0.253601 | 0.2121467 | 0.2335565 | 0.6442378 |
| Q9JIF7 | Copb1    | 0.4368963 | 0.3964993 | 0.2728956 | 0.8743196 | 0.8307245 | 0.4213575 | 0.0515106 | 0.6209341 |
| O55029 | Copb2    | -0.191966 | 0.3879309 | 0.6226794 | 0.8826986 | 0.2280146 | 0.4730061 | 0.6319583 | 0.7120542 |
| O89079 | Cope     | -0.062562 | 0.2374624 | 0.7957794 | 0.8943678 | 0.0095723 | 0.2079089 | 0.9639774 | 0.7733493 |
| Q9QZE5 | Copg1    | 0.0908043 | 0.2393961 | 0.7051855 | 0.8910745 | -0.194362 | 0.2665316 | 0.4676198 | 0.6738937 |
| Q9QXK3 | Copg2    | -0.272167 | 0.9123112 | 0.7741143 | 0.8935551 | -0.486439 | 1.1984081 | 0.6988918 | 0.7266885 |
| P61202 | Cops2    | 0.1697071 | 0.4130994 | 0.6840346 | 0.8900083 | -0.43685  | 0.4812696 | 0.3720662 | 0.6594641 |
| O88543 | Cops3    | 0.1522798 | 0.5148872 | 0.7689872 | 0.8923639 | -0.108956 | 0.566161  | 0.8485369 | 0.7536454 |
| O88544 | Cops4    | 0.0578957 | 0.2686881 | 0.8305196 | 0.8943678 | -0.564916 | 0.5901923 | 0.3452374 | 0.6594641 |
| O35864 | Cops5    | 0.9511471 | 1.3038461 | 0.4893845 | 0.8743196 | 1.9682434 | 0.5114021 | 0.0084726 | 0.6209341 |
| O88545 | Cops6    | -0.03584  | 0.5687375 | 0.9505846 | 0.9060514 | 0.3588421 | 0.7046322 | 0.6191028 | 0.7091807 |
| Q9CZ04 | Cops7a   | 0.2579834 | 0.3051426 | 0.4043371 | 0.8743196 | 0.3962254 | 0.4247122 | 0.3591261 | 0.6594641 |
| Q8VBV7 | Cops8    | -0.365282 | 1.5426258 | 0.8195981 | 0.8943678 | 0.2803451 | 0.4001887 | 0.5098339 | 0.6859477 |

|        |         |           |           |           |           |           |           |           |           |
|--------|---------|-----------|-----------|-----------|-----------|-----------|-----------|-----------|-----------|
| P61924 | Copz1   | 0.2158928 | 0.3346314 | 0.5285649 | 0.8753373 | -0.913616 | 0.3681608 | 0.0275286 | 0.6209341 |
| Q8BMS4 | Coq3    | 0.4279237 | 0.5487977 | 0.4414523 | 0.8743196 | 0.3240415 | 0.6773574 | 0.6362232 | 0.713543  |
| Q9CXI0 | Coq5    | 0.8258217 | 0.4034124 | 0.0492057 | 0.8743196 | 0.5367163 | 0.4021666 | 0.1931659 | 0.6418859 |
| Q8R1S0 | Coq6    | -0.257418 | 0.4738432 | 0.5908397 | 0.8753373 | 0.0419747 | 0.4833234 | 0.9314348 | 0.7661541 |
| P97478 | Coq7    | 0.529785  | 0.3380402 | 0.1251411 | 0.8743196 | -0.380473 | 0.3625511 | 0.3013814 | 0.6540599 |
| Q8K1Z0 | Coq9    | -0.019941 | 0.2948293 | 0.9462465 | 0.9060514 | -0.154201 | 0.3384368 | 0.6500888 | 0.7189488 |
| O89053 | Coro1a  | 0.2164936 | 0.5588569 | 0.7099793 | 0.8910745 | -1.31679  | 1.1242394 | 0.2858936 | 0.6518056 |
| Q9WUM3 | Coro1b  | -0.034538 | 0.4421669 | 0.9381387 | 0.9048359 | -0.021775 | 0.3509334 | 0.9508879 | 0.7706093 |
| Q9WUM4 | Coro1c  | 0.0207093 | 0.4525623 | 0.963795  | 0.9067461 | -0.766421 | 0.6353033 | 0.2381335 | 0.6456045 |
| Q9CQI6 | Cotl1   | -0.101978 | 0.2531276 | 0.6892429 | 0.8900083 | -0.099288 | 0.3232502 | 0.7605987 | 0.7380771 |
| Q8CFY5 | Cox10   | -1.019556 | 1.1899112 | 0.4198997 | 0.8743196 | 0.5162186 | 0.4239145 | 0.2690343 | 0.6500471 |
| P56394 | Cox17   | -0.799953 | 0.7112771 | 0.2723292 | 0.8743196 | -0.749886 | 0.5785656 | 0.209695  | 0.6429844 |
| P19783 | Cox4i1  | 0.1515165 | 0.2649258 | 0.5691822 | 0.8753373 | -0.230166 | 0.2653194 | 0.3890113 | 0.6611124 |
| P12787 | Cox5a   | -0.09925  | 0.33613   | 0.7687556 | 0.8923639 | -0.278052 | 0.3698168 | 0.4553379 | 0.6712964 |
| P19536 | Cox5b   | 0.597919  | 0.8622079 | 0.4914251 | 0.8743196 | 1.534582  | 0.7746795 | 0.0543345 | 0.6209341 |
| P43024 | Cox6a1  | -0.434274 | 0.4792859 | 0.3742856 | 0.8743196 | -0.704502 | 0.6080491 | 0.260256  | 0.6500471 |
| P43023 | Cox6a2  | 0.1405004 | 0.325689  | 0.6791559 | 0.8900083 | -0.83763  | 0.64713   | 0.2431172 | 0.6496933 |
| P56391 | Cox6b1  | 0.3324497 | 0.4174979 | 0.4292869 | 0.8743196 | 0.539731  | 0.3324394 | 0.1110226 | 0.6209341 |
| Q9CPQ1 | Cox6c   | 1.1275104 | 0.5356514 | 0.0434999 | 0.8743196 | 1.0637731 | 0.4774984 | 0.0344196 | 0.6209341 |
| P56392 | Cox7a1  | -0.470643 | 0.7146181 | 0.5312139 | 0.8753373 | -0.038148 | 0.6832193 | 0.9572852 | 0.7721509 |
| P48771 | Cox7a2  | 0.2394214 | 1.7260662 | 0.8908873 | 0.9006736 | -0.521005 | 1.6722072 | 0.758594  | 0.7380771 |
| P17665 | Cox7c   | 0.0221578 | 0.8372173 | 0.9796244 | 0.907439  | -0.833739 | 0.3493016 | 0.0542569 | 0.6209341 |
| Q61147 | Cp      | -0.351991 | 0.3471893 | 0.3127211 | 0.8743196 | -0.633092 | 0.3630899 | 0.0841798 | 0.6209341 |
| O89001 | Cpd     | 0.2085902 | 0.4750198 | 0.6738108 | 0.8900083 | -0.606189 | 0.5449512 | 0.3085495 | 0.6563949 |
| Q8C166 | Cpne1   | 0.0644438 | 0.7265944 | 0.9318101 | 0.9048359 | 0.8016442 | 0.4897524 | 0.1527799 | 0.6211692 |
| Q8BT60 | Cpne3   | -0.562365 | 0.6654245 | 0.4113204 | 0.8743196 | 0.0815803 | 0.499492  | 0.872773  | 0.7574724 |
| Q8BLR2 | Cpne4   | -0.611    | 0.5095929 | 0.2695378 | 0.8743196 | -0.4536   | 0.2025634 | 0.0664109 | 0.6209341 |
| P36552 | Cpox    | 0.1308136 | 0.3690958 | 0.7254264 | 0.8910745 | -0.091922 | 0.3610494 | 0.8009642 | 0.7439635 |
| Q8BFS6 | Cpped1  | -2.177122 | 0.9689154 | 0.0594635 | 0.8743196 | -0.932832 | 1.0929558 | 0.4261403 | 0.6694352 |
| Q9WVJ3 | Cpq     | -0.248073 | 0.3414478 | 0.4705941 | 0.8743196 | -0.678764 | 0.5215664 | 0.1993349 | 0.6429844 |
| Q8C196 | Cps1    | 0.0530589 | 0.0911459 | 0.5605817 | 0.8753373 | 0.0092275 | 0.0887444 | 0.917205  | 0.7627031 |
| Q9EPU4 | Cpsf1   | -0.332974 | 0.3615229 | 0.3876743 | 0.8743196 | -0.541773 | 0.2744163 | 0.0957811 | 0.6209341 |
| P97742 | Cpt1a   | -1.252279 | 0.5781011 | 0.0409062 | 0.8743196 | -0.675368 | 0.5328627 | 0.2195596 | 0.6434585 |
| Q924X2 | Cpt1b   | -0.020447 | 0.2990022 | 0.9456961 | 0.9060514 | 0.0943259 | 0.3455502 | 0.7858963 | 0.7439428 |
| Q8BGD5 | Cpt1c   | 0.3259863 | 0.9574781 | 0.7434965 | 0.8923639 | 2.0441594 | 0.7111355 | 0.0282602 | 0.6209341 |
| P52825 | Cpt2    | -0.529736 | 0.2864553 | 0.0660306 | 0.8743196 | -0.366045 | 0.3016265 | 0.2267003 | 0.6442378 |
| P19070 | Cr2     | 0.0474125 | 0.3189797 | 0.8860306 | 0.9006736 | -0.556298 | 0.3846062 | 0.1982045 | 0.6429844 |
| P62965 | Crabp1  | -0.534704 | 0.6874597 | 0.4621621 | 0.8743196 | -0.463417 | 0.3951312 | 0.2853189 | 0.6518056 |
| P47934 | Crat    | -0.201729 | 0.5017597 | 0.6886379 | 0.8900083 | -0.213018 | 0.4915236 | 0.6659646 | 0.7215904 |
| Q8VHS2 | Crb1    | 0.0783618 | 0.5243978 | 0.885427  | 0.9006736 | -1.636323 | 0.8477707 | 0.1018233 | 0.6209341 |
| Q9Z125 | Creb3l1 | 1.8228456 | 0.8509849 | 0.0694246 | 0.8743196 | 0.8879076 | 0.9973681 | 0.4076078 | 0.6657555 |
| P45481 | Crebbp  | 0.4828389 | 0.5565935 | 0.4144202 | 0.8743196 | -0.70891  | 0.6007243 | 0.2826256 | 0.6508436 |
| Q8CDG5 | Crebrf  | -0.111884 | 0.4214969 | 0.7930325 | 0.8943678 | 0.2876781 | 0.4669223 | 0.5447674 | 0.6979269 |
| O88668 | Creg1   | 0.3489656 | 0.4210435 | 0.4157299 | 0.8743196 | 0.1091893 | 0.5432111 | 0.8427231 | 0.752567  |
| Q8BGC9 | Creg2   | -1.107846 | 1.0315155 | 0.3184448 | 0.8743196 | -0.154701 | 0.5419436 | 0.7848926 | 0.7439428 |
| Q9CYA0 | Creld2  | -2.102902 | 2.2142693 | 0.3738904 | 0.8743196 | 0.089076  | 0.1819062 | 0.6417468 | 0.7159548 |
| P35347 | Crhr1   | 0.7858991 | 0.9383007 | 0.4299341 | 0.8743196 | 1.1716925 | 1.0808116 | 0.3199549 | 0.6594641 |
| P63254 | Crip1   | -0.074195 | 0.1655507 | 0.6604339 | 0.8900083 | -0.206452 | 0.1091756 | 0.0811171 | 0.6209341 |
| Q9DCT8 | Crip2   | -0.051513 | 0.6169522 | 0.9341791 | 0.9048359 | 0.3538936 | 0.3287687 | 0.2945528 | 0.6535699 |
| Q64010 | Crk     | 0.0009137 | 0.4961495 | 0.9985465 | 0.9113333 | -0.561278 | 0.6816823 | 0.4200064 | 0.6694352 |
| Q8CJ40 | Crocc   | -0.295871 | 0.4699874 | 0.5489901 | 0.8753373 | -0.342508 | 0.3532013 | 0.369634  | 0.6594641 |
| Q9DC50 | Crot    | 0.0630909 | 0.2572976 | 0.8067498 | 0.8943678 | -0.049715 | 0.3372033 | 0.883095  | 0.7585208 |
| Q9CYD3 | Crtap   | 0.4215266 | 0.8203734 | 0.6231931 | 0.8826986 | -0.182888 | 0.9357316 | 0.8514921 | 0.7537615 |
| P23927 | Cryab   | -0.176672 | 0.1979197 | 0.3733317 | 0.8743196 | -0.289461 | 0.1985875 | 0.1470992 | 0.6209341 |
| P62696 | Crybb2  | -0.615842 | 0.5413754 | 0.292742  | 0.8743196 | -0.445637 | 0.3014943 | 0.1898591 | 0.6405321 |
| Q99KP3 | Cryl1   | -0.125371 | 0.4214453 | 0.768086  | 0.8923639 | 0.0795382 | 0.3342216 | 0.8136929 | 0.7470412 |
| P47199 | Cryz    | 0.2972506 | 0.2756095 | 0.2827246 | 0.8743196 | 0.0726744 | 0.2852676 | 0.7993529 | 0.7439428 |
| Q9CZU6 | Cs      | -0.008055 | 0.2849113 | 0.9774889 | 0.9072902 | -0.01304  | 0.2744708 | 0.9621936 | 0.7730074 |
| Q9DBE0 | Csad    | 0.5909471 | 0.2596337 | 0.024053  | 0.8743196 | 0.6284988 | 0.2996655 | 0.0376083 | 0.6209341 |
| Q91W50 | Csde1   | -0.460414 | 0.3483496 | 0.1939691 | 0.8743196 | -0.685227 | 0.3506049 | 0.0589165 | 0.6209341 |
| Q9ERK4 | Cse1l   | -0.034871 | 0.7395401 | 0.963014  | 0.9067461 | -1.169579 | 0.832307  | 0.183399  | 0.6405321 |

|        |         |           |           |           |           |           |           |           |           |
|--------|---------|-----------|-----------|-----------|-----------|-----------|-----------|-----------|-----------|
| Q923L3 | Csmd1   | 0.9681801 | 0.3616194 | 0.0316608 | 0.8743196 | -0.74459  | 1.403584  | 0.6148219 | 0.7084882 |
| Q80T79 | Csmd3   | -0.805743 | 0.8440891 | 0.3549265 | 0.8743196 | 0.1754568 | 0.6031081 | 0.7757013 | 0.7428116 |
| Q60737 | Csnk2a1 | 0.8557461 | 1.0024218 | 0.4215322 | 0.8743196 | 1.0508971 | 0.9494935 | 0.3107706 | 0.6577795 |
| P67871 | Csnk2b  | -0.545536 | 0.5125166 | 0.3039708 | 0.8743196 | -0.191816 | 0.4817829 | 0.6969905 | 0.7265263 |
| Q8VHY0 | Cspg4   | -0.029809 | 0.8583178 | 0.9732652 | 0.9072902 | 0.0610489 | 0.6300414 | 0.925964  | 0.7634944 |
| Q8CID0 | Csrp2bp | 2.5689995 | 1.1799433 | 0.0659104 | 0.8743196 | 2.4085896 | 1.3302421 | 0.1201684 | 0.6209341 |
| P50462 | Csrp3   | 0.4366983 | 0.5663421 | 0.4432148 | 0.8743196 | 0.3999132 | 0.5685675 | 0.4844584 | 0.6796099 |
| Q62426 | Cstb    | 0.2151033 | 0.5292348 | 0.6965567 | 0.8900083 | -0.220958 | 0.4828785 | 0.663353  | 0.7215904 |
| Q99LC2 | Cstf1   | 0.6784281 | 0.5564671 | 0.2622634 | 0.8743196 | -0.038063 | 0.5936286 | 0.9509585 | 0.7706093 |
| Q99LI7 | Cstf3   | -0.015556 | 0.7889233 | 0.9848184 | 0.9078335 | 1.3460647 | 0.3903914 | 0.0136666 | 0.6209341 |
| Q8R311 | Ctage5  | 0.1594729 | 0.4836744 | 0.7446022 | 0.8923639 | -0.565528 | 0.5656449 | 0.329354  | 0.6594641 |
| Q7TSG2 | Ctdp1   | 0.0766049 | 2.3779674 | 0.9752003 | 0.9072902 | 2.8346351 | 1.7228972 | 0.1510158 | 0.6209341 |
| Q8VCN5 | Cth     | -0.388232 | 0.252402  | 0.1262215 | 0.8743196 | -0.390864 | 0.2180554 | 0.0754717 | 0.6209341 |
| Q61301 | Ctnna2  | 0.1693001 | 0.7370977 | 0.8249039 | 0.8943678 | -0.138655 | 0.8684831 | 0.8783945 | 0.7585027 |
| P30999 | Ctnnd1  | 0.0025139 | 0.3175782 | 0.9937524 | 0.9101701 | -0.205428 | 0.2492954 | 0.4196392 | 0.6694352 |
| P16675 | Ctsa    | -0.249241 | 0.5220283 | 0.6363934 | 0.8883187 | 0.2799191 | 0.5040884 | 0.5832631 | 0.7046302 |
| P10605 | Ctsb    | 0.2343335 | 0.2753477 | 0.3968839 | 0.8743196 | -0.298277 | 0.2802078 | 0.2901956 | 0.652142  |
| P97821 | Ctsc    | -0.798221 | 0.5810541 | 0.1793739 | 0.8743196 | -0.254042 | 0.3479258 | 0.4715794 | 0.6770544 |
| P18242 | Ctsd    | 0.2657678 | 0.3423225 | 0.4404374 | 0.8743196 | 0.1897721 | 0.3149953 | 0.5493439 | 0.6980496 |
| Q9R013 | Ctsf    | 1.0235993 | 1.0114422 | 0.3452242 | 0.8743196 | 1.3985507 | 1.0622454 | 0.2360267 | 0.6442378 |
| P49935 | Ctsh    | 0.2759439 | 0.2892108 | 0.3474005 | 0.8743196 | -0.156667 | 0.4560963 | 0.7338867 | 0.7331318 |
| P06797 | Ctsl1   | -1.468209 | 1.4005893 | 0.3293495 | 0.8743196 | 0.036738  | 0.7333242 | 0.9616705 | 0.7730074 |
| Q9WUU7 | Ctsz    | 0.227814  | 0.3076277 | 0.4626494 | 0.8743196 | -0.093632 | 0.3561578 | 0.7939482 | 0.7439428 |
| Q60598 | Cttm    | -0.083428 | 0.8135715 | 0.9196817 | 0.9048359 | 0.5406686 | 0.5697832 | 0.3599778 | 0.6594641 |
| Q3U308 | Ctu2    | -1.258553 | 0.6931105 | 0.1122565 | 0.8743196 | -0.319864 | 0.1744855 | 0.1164732 | 0.6209341 |
| Q9JLB4 | Cubn    | 0.9096447 | 0.6181887 | 0.1846382 | 0.8743196 | 0.4161687 | 0.732965  | 0.5907765 | 0.7051736 |
| Q9WTX6 | Cul1    | 1.3877561 | 0.4385144 | 0.006411  | 0.8743196 | 0.8052984 | 0.5159468 | 0.1425726 | 0.6209341 |
| Q9D4H8 | Cul2    | 0.7442389 | 0.5606679 | 0.1940649 | 0.8743196 | 0.2910394 | 0.6944981 | 0.6784843 | 0.7239064 |
| Q3TCH7 | Cul4a   | 1.8409987 | 1.4489122 | 0.2444652 | 0.8743196 | 4.0311801 | 0.5585301 | 0.0003585 | 0.5840626 |
| Q8VE73 | Cul7    | -0.217744 | 0.4132289 | 0.6032859 | 0.8792876 | 0.004386  | 0.3697759 | 0.9906538 | 0.7779647 |
| Q9D8X1 | Cutc    | -1.128191 | 1.830081  | 0.5570925 | 0.8753373 | 1.5591999 | 1.1690656 | 0.2306918 | 0.6442378 |
| P70403 | Cux1    | -0.8597   | 0.6290915 | 0.2140311 | 0.8743196 | -0.223904 | 1.0524233 | 0.838565  | 0.7519044 |
| P70298 | Cux2    | 0.9429608 | 0.7887077 | 0.2707874 | 0.8743196 | 1.1786119 | 0.6501435 | 0.1198013 | 0.6209341 |
| Q9WVL7 | Cxcl15  | -0.061922 | 0.6992409 | 0.9319146 | 0.9048359 | 1.0878922 | 0.769551  | 0.207183  | 0.6429844 |
| Q810W6 | Cxcr1   | 0.3532241 | 1.3252642 | 0.7975109 | 0.8943678 | 1.2519125 | 1.7198486 | 0.4940778 | 0.6823283 |
| P70658 | Cxcr4   | -0.19806  | 0.7741342 | 0.805424  | 0.8943678 | 0.072847  | 0.7493991 | 0.9257277 | 0.7634944 |
| Q9CWW7 | Cxxc1   | -0.620325 | 1.0215455 | 0.5628617 | 0.8753373 | -0.951459 | 0.6730614 | 0.2071947 | 0.6429844 |
| P56395 | Cyb5a   | -0.151    | 0.3197081 | 0.6383397 | 0.8883187 | -0.117803 | 0.2721237 | 0.6667773 | 0.7215904 |
| Q9DB73 | Cyb5r1  | 1.3299877 | 1.1438616 | 0.2830455 | 0.8743196 | 0.4969094 | 1.1187197 | 0.6724862 | 0.7227095 |
| Q9DCN2 | Cyb5r3  | -0.32444  | 0.3549816 | 0.3632622 | 0.8743196 | -0.317029 | 0.2989941 | 0.2923574 | 0.6532982 |
| Q9D0M3 | Cyc1    | -0.686971 | 0.5361893 | 0.2048157 | 0.8743196 | -0.549834 | 0.3656602 | 0.1383862 | 0.6209341 |
| P62897 | Cycc    | -0.534855 | 0.2565439 | 0.0436781 | 0.8743196 | -0.269172 | 0.2135203 | 0.2160212 | 0.6434585 |
| Q9CX80 | Cygb    | 0.7368605 | 0.5198191 | 0.1767647 | 0.8743196 | -0.645282 | 0.9394741 | 0.5042428 | 0.6828196 |
| Q9QZ82 | Cyp11a1 | -0.210473 | 0.4255147 | 0.628026  | 0.8843626 | -0.079119 | 0.2980196 | 0.7948008 | 0.7439428 |
| P00186 | Cyp1a2  | -0.066452 | 0.2844714 | 0.8159698 | 0.8943678 | -0.304364 | 0.3382223 | 0.3716597 | 0.6594641 |
| Q64429 | Cyp1b1  | -0.499075 | 1.7907789 | 0.7885348 | 0.8943678 | 0.5144012 | 2.054929  | 0.8106867 | 0.7465637 |
| B2RXA7 | Cyp26c1 | 1.1016898 | 0.7637414 | 0.1697194 | 0.8743196 | 0.3624888 | 0.8635034 | 0.6814947 | 0.7239064 |
| Q9DBG1 | Cyp27a1 | 0.5474154 | 0.498965  | 0.2781862 | 0.8743196 | 0.4967513 | 0.5147852 | 0.3402182 | 0.6594641 |
| P56593 | Cyp2a12 | -0.053036 | 0.2978074 | 0.8591095 | 0.897347  | -0.391757 | 0.3491437 | 0.2657299 | 0.6500471 |
| P20852 | Cyp2a5  | -0.519099 | 0.524216  | 0.3377633 | 0.8743196 | -0.538747 | 1.1036807 | 0.633583  | 0.7130041 |
| Q64458 | Cyp2c29 | 0.9289384 | 0.5842821 | 0.1185668 | 0.8743196 | 0.9840932 | 0.6197052 | 0.1199689 | 0.6209341 |
| P56654 | Cyp2c37 | -0.131901 | 0.7048798 | 0.8532035 | 0.8962775 | 0.825843  | 0.4232966 | 0.0652104 | 0.6209341 |
| P56657 | Cyp2c40 | -0.32212  | 0.4822674 | 0.5143258 | 0.8753373 | 0.0476885 | 0.2849153 | 0.8696485 | 0.7571111 |
| Q91X77 | Cyp2c50 | 0.347527  | 0.373811  | 0.3672544 | 0.8743196 | -0.257946 | 0.5846482 | 0.6663185 | 0.7215904 |
| Q6XVG2 | Cyp2c54 | 0.1996444 | 0.3917594 | 0.6177401 | 0.8816934 | -0.709972 | 0.6401443 | 0.2874912 | 0.6518981 |
| Q91W64 | Cyp2c70 | -0.396201 | 0.2834694 | 0.1687703 | 0.8743196 | -0.426051 | 0.3755524 | 0.2631891 | 0.6500471 |
| P24456 | Cyp2d10 | -0.027072 | 0.2905056 | 0.9260503 | 0.9048359 | -0.010494 | 0.2765871 | 0.9698717 | 0.7751233 |
| Q8CIM7 | Cyp2d26 | 0.250804  | 0.3357892 | 0.4573358 | 0.8743196 | 0.6024004 | 0.3091654 | 0.0554263 | 0.6209341 |
| P11714 | Cyp2d9  | 0.3865334 | 0.3070448 | 0.2127175 | 0.8743196 | -0.013826 | 0.375774  | 0.9707823 | 0.7751875 |
| Q05421 | Cyp2e1  | -0.26856  | 0.3078704 | 0.3845856 | 0.8743196 | -0.328677 | 0.3458683 | 0.3439049 | 0.6594641 |
| P33267 | Cyp2f2  | -0.158309 | 0.2560619 | 0.5375942 | 0.8753373 | -0.300605 | 0.2392961 | 0.2118562 | 0.6429844 |

|        |             |           |           |           |           |           |           |           |           |
|--------|-------------|-----------|-----------|-----------|-----------|-----------|-----------|-----------|-----------|
| Q9DBX6 | Cyp2s1      | 0.1928867 | 0.9620462 | 0.8437856 | 0.8958903 | 1.6835186 | 0.8083961 | 0.0576074 | 0.6209341 |
| Q64459 | Cyp3a11     | -0.515604 | 0.3982176 | 0.2008054 | 0.8743196 | -0.584386 | 0.3602932 | 0.11136   | 0.6209341 |
| Q64464 | Cyp3a13     | -0.018676 | 0.4677892 | 0.968409  | 0.9072902 | -0.101746 | 0.6459031 | 0.8760036 | 0.7581843 |
| Q9EQW4 | Cyp3a44     | -0.246309 | 1.0366031 | 0.8189874 | 0.8943678 | 0.8805197 | 0.7899068 | 0.3076216 | 0.6559102 |
| Q91WL5 | Cyp4a12a    | 0.069379  | 0.3922782 | 0.8611653 | 0.897347  | -0.157044 | 0.4526634 | 0.7322652 | 0.7326734 |
| Q9DBW0 | Cyp4v2      | 0.4547667 | 0.3615113 | 0.2210282 | 0.8743196 | 0.1892885 | 0.38389   | 0.6273264 | 0.7115945 |
| Q8K0C4 | Cyp51a1     | 0.0743887 | 0.2009293 | 0.7137336 | 0.8910745 | -0.359737 | 0.3559549 | 0.3211669 | 0.6594641 |
| Q60991 | Cyp7b1      | 0.7583332 | 0.6133771 | 0.2256236 | 0.8743196 | 0.5357005 | 0.7554236 | 0.484317  | 0.6796099 |
| O88962 | Cyp8b1      | 0.5182424 | 0.5192533 | 0.3514962 | 0.8743196 | -0.981691 | 1.4178572 | 0.5145899 | 0.6898801 |
| Q9D172 | D10Jhu81e   | -0.090165 | 0.3214987 | 0.779495  | 0.8940257 | 0.5015842 | 0.2958098 | 0.0921946 | 0.6209341 |
| Q99LF4 | D10Wsu52e   | -0.682488 | 0.4452494 | 0.1333928 | 0.8743196 | -0.013338 | 0.3911641 | 0.9729981 | 0.7754267 |
| Q6PIX9 | D11Wsu47e   | -0.618355 | 1.2065978 | 0.6240861 | 0.8826986 | 0.3442217 | 0.7305329 | 0.6541475 | 0.7198872 |
| Q9CPT4 | D17Wsu104e  | -0.956235 | 0.5649141 | 0.104015  | 0.8743196 | -0.577959 | 0.7204043 | 0.4318271 | 0.6694352 |
| Q9CWN7 | D1Bwg0212e  | -0.03053  | 0.368785  | 0.9363394 | 0.9048359 | -0.71198  | 0.4018753 | 0.1268349 | 0.6209341 |
| Q8CIM3 | D2hgdh      | 0.64343   | 0.8230282 | 0.4465071 | 0.8743196 | -0.230393 | 0.7273839 | 0.7564681 | 0.73805   |
| Q8BGN2 | D3ErtD751e  | 0.5645545 | 1.2471282 | 0.6644732 | 0.8900083 | 0.470595  | 1.5116287 | 0.7660929 | 0.7397855 |
| J3QNN4 | D730048J04F | 0.0492768 | 0.7674559 | 0.9505998 | 0.9060514 | -0.189214 | 0.8663867 | 0.8343604 | 0.7519044 |
| Q3UR52 | D7Bwg0826e  | -0.147819 | 0.3517606 | 0.68692   | 0.8900083 | -0.473809 | 0.4618333 | 0.3444949 | 0.6594641 |
| D2JOY4 | D7ErtD443e  | 1.4146403 | 1.0127165 | 0.2051386 | 0.8743196 | 1.246431  | 1.1424324 | 0.3171221 | 0.6594641 |
| Q9JJR6 | D7h11orf16  | -0.34904  | 0.5353252 | 0.5352066 | 0.8753373 | -0.641483 | 0.6216619 | 0.3419143 | 0.6594641 |
| P61804 | Dad1        | 0.4785868 | 0.7100411 | 0.5070124 | 0.8753373 | 0.9150134 | 0.6971466 | 0.2042109 | 0.6429844 |
| Q8VC30 | Dak         | 0.3368374 | 0.1892562 | 0.0766354 | 0.8743196 | 0.200558  | 0.1957239 | 0.3069279 | 0.6553142 |
| Q9ER88 | Dap3        | 0.0561678 | 1.0519354 | 0.9589093 | 0.9067461 | -0.7297   | 0.8730533 | 0.4352799 | 0.6699704 |
| Q9D757 | Dapl1       | -0.379589 | 1.0316319 | 0.7237847 | 0.8910745 | 1.3698933 | 1.1329954 | 0.2721067 | 0.6500471 |
| Q9QUI6 | Darc        | -0.12117  | 0.2682245 | 0.6651152 | 0.8900083 | -0.10998  | 0.119975  | 0.3946575 | 0.6617584 |
| Q922B2 | Dars        | 0.094517  | 0.2438884 | 0.6989654 | 0.8901989 | 0.1891022 | 0.2941868 | 0.5216034 | 0.6929797 |
| O35613 | Daxx        | 0.2482302 | 0.7229512 | 0.7414116 | 0.8923639 | 0.62185   | 0.482213  | 0.2446738 | 0.6500471 |
| P31786 | Dbi         | 0.0915059 | 0.2266234 | 0.6877421 | 0.8900083 | -0.101472 | 0.2574632 | 0.695014  | 0.7260121 |
| Q62418 | Dbnl        | 2.4587835 | 1.6124839 | 0.1481034 | 0.8743196 | 2.3205399 | 1.571278  | 0.1635271 | 0.6273856 |
| P53395 | Dbt         | 0.1609181 | 0.2038731 | 0.4309551 | 0.8743196 | 0.0653229 | 0.2269186 | 0.7738194 | 0.7428116 |
| Q6PFH3 | Dcaf15      | -0.244875 | 0.5393505 | 0.6635573 | 0.8900083 | -1.170259 | 1.3636126 | 0.4237308 | 0.6694352 |
| Q8N7N5 | Dcaf8       | -0.365568 | 0.4221364 | 0.4001326 | 0.8743196 | -1.189939 | 0.8308622 | 0.1756981 | 0.6347112 |
| P70211 | Dcc         | -0.710229 | 1.0819083 | 0.5325071 | 0.8753373 | -0.655021 | 1.1164155 | 0.5787838 | 0.7021424 |
| Q5DU00 | Dcdc2       | -2.371317 | 2.2965179 | 0.3361545 | 0.8743196 | 0.0385696 | 0.1668129 | 0.8248309 | 0.749393  |
| P28654 | Dcn         | 0.130423  | 1.0383525 | 0.9035754 | 0.9044421 | 0.6618946 | 0.8424364 | 0.4619388 | 0.6725223 |
| Q91YD3 | Dcp1a       | 0.7781043 | 1.0601346 | 0.4868192 | 0.8743196 | -0.377004 | 1.5653468 | 0.8176948 | 0.7474231 |
| Q3U564 | Dcp1b       | -1.864294 | 1.7304597 | 0.317049  | 0.8743196 | -0.082374 | 0.6423516 | 0.9021506 | 0.7610813 |
| Q9CYC6 | Dcp2        | -1.183826 | 2.1910653 | 0.6057473 | 0.8792876 | 0.406299  | 0.7579163 | 0.6111887 | 0.7082928 |
| Q9DAR7 | Dcps        | -0.643183 | 0.7008026 | 0.3682587 | 0.8743196 | 0.0659009 | 0.2981788 | 0.8273242 | 0.7510933 |
| Q8K2D6 | Dctd        | -0.782138 | 0.9428116 | 0.434151  | 0.8743196 | -0.079604 | 0.2378537 | 0.7492589 | 0.7375672 |
| O08788 | Dctn1       | 0.6957258 | 0.3523035 | 0.0604154 | 0.8743196 | 0.2425689 | 0.3941008 | 0.545166  | 0.6979269 |
| Q9BY93 | Dctpp1      | 1.1381609 | 1.8607738 | 0.5600954 | 0.8753373 | 0.4417925 | 2.0645964 | 0.8376454 | 0.7519044 |
| Q8BZJ7 | Dcun1d2     | 1.4665943 | 0.4941844 | 0.0095822 | 0.8743196 | 0.6472713 | 0.5623601 | 0.2704669 | 0.6500471 |
| Q8CCA0 | Dcun1d4     | 0.4127206 | 1.2853513 | 0.7575123 | 0.8923639 | 0.7495829 | 1.1130951 | 0.5257546 | 0.69337   |
| Q91X52 | Dcxr        | -0.372193 | 0.2959153 | 0.2131171 | 0.8743196 | 0.1305393 | 0.3060407 | 0.6713777 | 0.7227095 |
| Q9CWS0 | Ddah1       | -0.738211 | 0.3144825 | 0.0214099 | 0.8743196 | -0.41238  | 0.2424451 | 0.0934608 | 0.6209341 |
| Q99LD8 | Ddah2       | 1.042665  | 0.8797877 | 0.2544021 | 0.8743196 | 1.3800875 | 1.008195  | 0.1942287 | 0.6418859 |
| Q3U1J4 | Ddb1        | -0.421891 | 0.3495135 | 0.2319136 | 0.8743196 | -0.098157 | 0.3097369 | 0.7525157 | 0.7375672 |
| O88533 | Ddc         | 0.2681452 | 0.3206267 | 0.4052684 | 0.8743196 | 0.4040237 | 0.3696532 | 0.2778548 | 0.6500471 |
| Q9DAF3 | Ddi1        | -0.288535 | 1.0284791 | 0.7871697 | 0.8943678 | 0.473757  | 1.0939688 | 0.680104  | 0.7239064 |
| A2ADY9 | Ddi2        | 0.0222756 | 0.3011487 | 0.9414133 | 0.9048359 | -0.690804 | 0.4040749 | 0.0964543 | 0.6209341 |
| O54734 | Ddost       | 0.2841797 | 0.4119774 | 0.4954553 | 0.8748057 | -0.752025 | 0.5940486 | 0.2163523 | 0.6434585 |
| Q03146 | Ddr1        | -0.443832 | 0.6193516 | 0.496823  | 0.8748057 | -2.97927  | 1.7824512 | 0.1456667 | 0.6209341 |
| Q62371 | Ddr2        | -1.16255  | 0.5492822 | 0.0514325 | 0.8743196 | -0.892606 | 0.6241307 | 0.1762647 | 0.6355136 |
| Q80WW9 | Ddrkg1      | -1.58635  | 0.6417558 | 0.0427145 | 0.8743196 | -1.022321 | 1.1345267 | 0.4022555 | 0.6636198 |
| Q91VR5 | Ddx1        | -0.041858 | 0.3677299 | 0.9103612 | 0.9048359 | 0.0927937 | 0.3473019 | 0.7920629 | 0.7439428 |
| Q61655 | Ddx19a      | -0.972915 | 0.953043  | 0.3413033 | 0.8743196 | -0.133764 | 0.1303441 | 0.3443622 | 0.6594641 |
| D3Z0M9 | Ddx23       | -0.236188 | 0.3512112 | 0.5228387 | 0.8753373 | -0.300977 | 0.4204723 | 0.5010058 | 0.6823283 |
| Q8BND4 | Ddx26b      | -0.150673 | 0.2736904 | 0.5990797 | 0.8772764 | -0.112595 | 0.1477657 | 0.4749455 | 0.6774295 |
| Q921N6 | Ddx27       | -0.605207 | 0.7291693 | 0.4339316 | 0.8743196 | 0.0139203 | 0.8821985 | 0.9879222 | 0.7775007 |
| Q9CWT6 | Ddx28       | -0.030395 | 0.23841   | 0.9021375 | 0.9038403 | -0.269024 | 0.2030784 | 0.2334788 | 0.6442378 |

|        |         |           |           |           |           |           |           |           |           |
|--------|---------|-----------|-----------|-----------|-----------|-----------|-----------|-----------|-----------|
| Q810A7 | Ddx42   | -0.53883  | 0.7049967 | 0.4696623 | 0.8743196 | 0.0728046 | 0.8424785 | 0.9339466 | 0.7669305 |
| D3Z6P9 | Ddx43   | -0.691341 | 1.0178059 | 0.5188026 | 0.8753373 | -0.331534 | 1.1321178 | 0.7795049 | 0.7432569 |
| Q61656 | Ddx5    | 0.1127234 | 0.5322199 | 0.8382988 | 0.8947711 | 0.6052164 | 0.4799373 | 0.2541112 | 0.6500471 |
| Q6P9R1 | Ddx51   | -1.921914 | 1.6819838 | 0.2907568 | 0.8743196 | 0.7633019 | 1.2282982 | 0.5571736 | 0.6980496 |
| Q8K4L0 | Ddx54   | -0.012171 | 0.5302554 | 0.9823287 | 0.9077764 | -0.181304 | 0.3450485 | 0.6181184 | 0.7091807 |
| Q6Q899 | Ddx58   | 1.8348477 | 1.2277781 | 0.1787062 | 0.8743196 | 1.451722  | 1.1775733 | 0.2637562 | 0.6500471 |
| Q9DBN9 | Ddx59   | 0.3433059 | 1.0220616 | 0.7416021 | 0.8923639 | -0.169177 | 1.4381761 | 0.9081566 | 0.7612577 |
| Q9CQ62 | Decr1   | 0.0840484 | 0.276367  | 0.7617025 | 0.8923639 | -0.17581  | 0.2749079 | 0.5242435 | 0.69337   |
| Q9WV68 | Decr2   | -1.354125 | 1.2472287 | 0.3135769 | 0.8743196 | 0.0498131 | 0.5775798 | 0.9340781 | 0.7669305 |
| Q7TNV0 | Dek     | -0.939625 | 0.6778355 | 0.2082296 | 0.8743196 | -1.863225 | 1.1509109 | 0.1565931 | 0.6211692 |
| A6H8H2 | Dennd4c | 0.4665796 | 1.5674357 | 0.7745949 | 0.8935551 | -0.560707 | 1.3528566 | 0.6929463 | 0.7253631 |
| Q91WS7 | Depdc7  | 0.3016802 | 0.5483201 | 0.5992976 | 0.8772764 | 0.418735  | 0.364522  | 0.2943949 | 0.6535699 |
| Q570Y9 | Deptor  | 0.2330096 | 0.5815479 | 0.7006095 | 0.8901989 | -1.283524 | 1.1952406 | 0.324162  | 0.6594641 |
| Q91YP3 | Dera    | 1.2859555 | 0.6066626 | 0.0421386 | 0.8743196 | 0.713289  | 0.6370108 | 0.2726853 | 0.6500471 |
| P31001 | Des     | -0.887045 | 0.4314433 | 0.0513046 | 0.8743196 | -0.229981 | 0.1827871 | 0.2228133 | 0.6442378 |
| O54788 | Dffb    | 0.1656401 | 0.5198215 | 0.7543873 | 0.8923639 | -0.088732 | 0.587465  | 0.8822609 | 0.7585208 |
| Q9Z2A7 | Dgat1   | -0.478654 | 0.2796483 | 0.1306995 | 0.8743196 | -1.172721 | 0.190458  | 0.0008417 | 0.5840626 |
| O88673 | Dgka    | 0.7893414 | 0.6605824 | 0.271029  | 0.8743196 | -1.477696 | 1.3895004 | 0.3284836 | 0.6594641 |
| A0JP53 | Dgkh    | 0.8270763 | 1.3147821 | 0.5492799 | 0.8753373 | 0.1937871 | 2.4110649 | 0.9385536 | 0.7681455 |
| Q6P5E8 | Dgkq    | 1.2076971 | 1.6177028 | 0.4796522 | 0.8743196 | 0.3861281 | 1.8467871 | 0.8413028 | 0.7524932 |
| Q9QX60 | Dguok   | -0.346295 | 0.6525243 | 0.603396  | 0.8792876 | -0.290569 | 0.8792833 | 0.7463166 | 0.736565  |
| Q8VCH6 | Dhcr24  | -5.452861 | 4.5308416 | 0.2678998 | 0.8743196 | -6.722648 | 4.9494907 | 0.2232331 | 0.6442378 |
| O88455 | Dhcr7   | 0.1441909 | 0.1701237 | 0.4247083 | 0.8743196 | -0.30792  | 0.2271174 | 0.2239763 | 0.6442378 |
| Q9DBB8 | Dhdh    | -0.514823 | 0.3350053 | 0.1274179 | 0.8743196 | -0.368595 | 0.2944318 | 0.2138548 | 0.6429844 |
| P00375 | Dhfr    | -0.067631 | 0.4077952 | 0.868989  | 0.898064  | 0.0831817 | 0.4131406 | 0.8414284 | 0.7524932 |
| Q3TXU5 | Dhps    | 0.850157  | 0.9042366 | 0.3784213 | 0.8743196 | 1.6848682 | 0.9336094 | 0.1211642 | 0.6209341 |
| Q99L04 | Dhrs1   | -0.076948 | 0.3069269 | 0.8029762 | 0.8943678 | 0.0884058 | 0.2705944 | 0.7453078 | 0.7359583 |
| Q3U0B3 | Dhrs11  | -0.994789 | 0.4270429 | 0.0265219 | 0.8743196 | -0.455931 | 0.2488967 | 0.0780342 | 0.6209341 |
| Q99LB2 | Dhrs4   | -0.189976 | 0.2608365 | 0.4683655 | 0.8743196 | -0.184838 | 0.2758094 | 0.5047841 | 0.683061  |
| Q9CXR1 | Dhrs7   | 10.418038 | 2.9660171 | 0.0098267 | 0.8743196 | 6.9897355 | 4.0354317 | 0.1339671 | 0.6209341 |
| Q58NB6 | Dhrs9   | 0.2113101 | 0.3715425 | 0.5779509 | 0.8753373 | -0.329613 | 0.3110339 | 0.308559  | 0.6563949 |
| O35286 | Dhx15   | -0.587739 | 0.4891688 | 0.2481825 | 0.8743196 | 0.087327  | 0.1844808 | 0.643802  | 0.7165096 |
| O70133 | Dhx9    | 2.2085697 | 2.2765062 | 0.3642875 | 0.8743196 | 1.7530192 | 2.3805265 | 0.4892669 | 0.6803412 |
| Q8R418 | Dicer1  | -0.281056 | 0.6306352 | 0.6692919 | 0.8900083 | 0.4716854 | 0.4677905 | 0.3522173 | 0.6594641 |
| Q8C0S1 | Dis3l   | -0.326699 | 0.3052742 | 0.3200447 | 0.8743196 | -0.293575 | 0.1061873 | 0.032651  | 0.6209341 |
| Q8CIP5 | Disp2   | 0.3915011 | 0.514475  | 0.4715254 | 0.8743196 | -0.411665 | 0.5729125 | 0.499432  | 0.6823283 |
| Q80Y83 | Dixdc1  | 0.8263565 | 1.7256027 | 0.6466211 | 0.8896469 | 1.5789758 | 1.8564396 | 0.4276568 | 0.6694352 |
| Q8BMF4 | Dlat    | -0.186374 | 0.3616408 | 0.6071993 | 0.8792876 | -0.131441 | 0.3424098 | 0.7018081 | 0.7266885 |
| O08749 | Dld     | -0.146425 | 0.2211851 | 0.5089279 | 0.8753373 | 0.4816485 | 0.1602425 | 0.0031443 | 0.5840626 |
| Q8BLA1 | Dlec1   | 0.1562178 | 0.4865234 | 0.7575163 | 0.8923639 | -0.979782 | 0.8274699 | 0.2811623 | 0.6506857 |
| Q91XM9 | Dlg2    | -0.706603 | 0.6191625 | 0.2913104 | 0.8743196 | -0.887388 | 0.3030135 | 0.026337  | 0.6209341 |
| Q09163 | Dlk1    | 0.1925116 | 0.8098397 | 0.8153181 | 0.8943678 | 0.0459181 | 0.8583658 | 0.958151  | 0.7721509 |
| Q9JI71 | Dll4    | 1.0652567 | 0.634141  | 0.1368785 | 0.8743196 | -0.744273 | 1.1605779 | 0.5450334 | 0.6979269 |
| Q9D2G2 | Dlst    | 0.2755358 | 0.2737352 | 0.3160516 | 0.8743196 | 0.185787  | 0.2959466 | 0.5314428 | 0.6939525 |
| Q61880 | Dmc1    | 1.0687421 | 1.2343124 | 0.4152546 | 0.8743196 | 0.7493016 | 1.4037201 | 0.6126691 | 0.7082928 |
| P11531 | Dmd     | 0.7851182 | 0.6163014 | 0.2220774 | 0.8743196 | 1.3037868 | 0.6025918 | 0.0497025 | 0.6209341 |
| Q9DBT9 | Dmgdh   | 0.1843149 | 0.1664186 | 0.2688373 | 0.8743196 | 0.389945  | 0.1787189 | 0.0298934 | 0.6209341 |
| O55188 | Dmp1    | 0.3716541 | 1.0049647 | 0.722453  | 0.8910745 | 0.4784992 | 1.0786086 | 0.6728625 | 0.7227095 |
| Q9QZ59 | Dmrt1   | -1.075352 | 0.9906804 | 0.3136756 | 0.8743196 | 0.2184527 | 0.4388317 | 0.6363372 | 0.713543  |
| Q8BPN8 | Dmxi2   | -0.426061 | 0.5868859 | 0.491412  | 0.8743196 | -0.074894 | 0.727342  | 0.9213421 | 0.7630855 |
| Q69Z23 | Dnah17  | 0.556421  | 0.8201624 | 0.5192912 | 0.8753373 | 0.0650561 | 1.0152759 | 0.9509902 | 0.7706093 |
| Q8VHE6 | Dnah5   | 1.0265651 | 0.6822947 | 0.176146  | 0.8743196 | -0.312393 | 0.7225876 | 0.6806104 | 0.7239064 |
| E9Q8T7 | Dnahc1  | 0.6053939 | 0.4498528 | 0.2203348 | 0.8743196 | -0.43998  | 0.8564331 | 0.6258008 | 0.7115156 |
| Q91XQ0 | Dnahc8  | 0.784489  | 0.4281844 | 0.0799134 | 0.8743196 | 0.4024044 | 0.6895918 | 0.5660532 | 0.6997388 |
| B1AR51 | Dnahc9  | -0.586624 | 0.4888834 | 0.2691989 | 0.8743196 | -0.894419 | 0.4324692 | 0.0841005 | 0.6209341 |
| A2AC93 | Dnai2   | -0.561189 | 1.0412609 | 0.6066277 | 0.8792876 | -0.801791 | 0.3738188 | 0.0756405 | 0.6209341 |
| P63037 | Dnaja1  | 0.3085647 | 0.4635713 | 0.5089044 | 0.8753373 | 0.5414486 | 0.3874476 | 0.1697874 | 0.6323131 |
| Q9QYJ0 | Dnaja2  | 0.3225994 | 0.3961331 | 0.4181555 | 0.8743196 | 0.373074  | 0.4361862 | 0.3956734 | 0.6617584 |
| Q99M87 | Dnaja3  | -0.670232 | 0.7107117 | 0.3606008 | 0.8743196 | -1.567058 | 1.3917211 | 0.2805293 | 0.6506857 |
| Q9JMC3 | Dnaja4  | 0.9409651 | 1.0931536 | 0.4178642 | 0.8743196 | 2.6988927 | 0.5389179 | 0.0024329 | 0.5840626 |
| Q99KV1 | Dnajb11 | -0.720581 | 0.5844577 | 0.257406  | 0.8743196 | -0.172723 | 0.9759966 | 0.865354  | 0.7571111 |

|        |         |           |           |           |           |           |           |           |           |
|--------|---------|-----------|-----------|-----------|-----------|-----------|-----------|-----------|-----------|
| Q9D832 | Dnajb4  | 0.2603761 | 1.3304566 | 0.8504014 | 0.8962775 | 1.1228506 | 0.9650089 | 0.2887755 | 0.652142  |
| Q9QYI8 | Dnajb7  | 3.427226  | 1.7655371 | 0.0933726 | 0.8743196 | 2.0188033 | 2.4682937 | 0.4446761 | 0.6699704 |
| Q9QYI7 | Dnajb8  | -0.434745 | 1.5099869 | 0.7817509 | 0.8940257 | 1.8160435 | 0.6055342 | 0.0240368 | 0.6209341 |
| Q5U458 | Dnajc11 | 0.3139533 | 1.0026238 | 0.7584923 | 0.8923639 | 1.4807064 | 0.8239024 | 0.0955638 | 0.6209341 |
| Q78YY6 | Dnajc15 | 0.5093002 | 0.7334932 | 0.5098441 | 0.8753373 | 0.7066291 | 0.7682337 | 0.3931495 | 0.6617584 |
| Q80TN4 | Dnajc16 | -0.344754 | 0.5998859 | 0.5834843 | 0.8753373 | -1.097637 | 0.497484  | 0.0694891 | 0.6209341 |
| P54103 | Dnajc2  | -0.340012 | 0.752982  | 0.6652488 | 0.8900083 | -0.393285 | 0.7338775 | 0.6113018 | 0.7082928 |
| Q9QYI3 | Dnajc7  | -0.747758 | 0.8256522 | 0.3794346 | 0.8743196 | 0.8709976 | 0.6426432 | 0.198392  | 0.6429844 |
| Q6NZB0 | Dnajc8  | 0.6579395 | 2.7616534 | 0.8185178 | 0.8943678 | 3.7288147 | 2.6449482 | 0.2082725 | 0.6429844 |
| Q8BVN8 | Dnali1  | -0.044623 | 0.5196365 | 0.9339711 | 0.9048359 | -2.465053 | 2.126192  | 0.2903529 | 0.652142  |
| Q9QY48 | Dnase2b | 0.8534438 | 1.4499216 | 0.5746137 | 0.8753373 | 3.3217671 | 1.1246037 | 0.0254896 | 0.6209341 |
| Q6VY05 | Dnd1    | 0.2396295 | 0.9543097 | 0.8089465 | 0.8943678 | -2.345699 | 1.5684039 | 0.1853896 | 0.6405321 |
| Q9D113 | Dnlz    | -0.945653 | 1.7808472 | 0.6118347 | 0.8792876 | 0.4918578 | 1.3344797 | 0.7250987 | 0.7309165 |
| Q8K1M6 | Dnm1l   | 0.1697906 | 0.2286179 | 0.4595062 | 0.8743196 | 0.2764945 | 0.1989756 | 0.1683697 | 0.6323131 |
| Q6TXD4 | Dnmbp   | -2.244817 | 1.3955369 | 0.151746  | 0.8743196 | -0.051026 | 0.4753828 | 0.9180216 | 0.7627031 |
| P13864 | Dnmt1   | 0.5151703 | 0.7611349 | 0.5202365 | 0.8753373 | 0.8740517 | 0.945597  | 0.3909697 | 0.6612653 |
| Q88508 | Dnmt3a  | -0.889462 | 0.9267281 | 0.3691329 | 0.8743196 | -0.433392 | 0.1940976 | 0.0670019 | 0.6209341 |
| Q9CWR8 | Dnmt3l  | -0.165264 | 0.7505989 | 0.8320175 | 0.8943678 | -0.306523 | 0.7827344 | 0.7088801 | 0.7286649 |
| A2AF47 | Dock11  | 0.0583039 | 1.1692401 | 0.9616231 | 0.9067461 | 0.0843663 | 1.4564087 | 0.9556873 | 0.77193   |
| Q8C3J5 | Dock2   | -0.76582  | 0.3975084 | 0.0954055 | 0.8743196 | -1.93857  | 0.9423478 | 0.0853902 | 0.6209341 |
| Q8CIQ7 | Dock3   | -0.179672 | 0.6980502 | 0.8042795 | 0.8943678 | -0.126806 | 0.5102738 | 0.8120304 | 0.7465955 |
| P59764 | Dock4   | -0.814754 | 0.7215532 | 0.2960324 | 0.8743196 | -0.633101 | 0.3723566 | 0.1399906 | 0.6209341 |
| Q8VDR9 | Dock6   | -0.483989 | 0.7895028 | 0.5490391 | 0.8753373 | -0.911195 | 0.795053  | 0.2724206 | 0.6500471 |
| Q8R1A4 | Dock7   | 0.5474476 | 0.7644444 | 0.4811148 | 0.8743196 | 0.5342432 | 0.5844443 | 0.3715511 | 0.6594641 |
| Q8C147 | Dock8   | -0.107039 | 0.3488583 | 0.7679013 | 0.8923639 | -0.316341 | 0.703119  | 0.6685722 | 0.7220514 |
| Q99KE3 | Dok4    | -0.116858 | 0.3442886 | 0.7442509 | 0.8923639 | -0.635626 | 1.0400962 | 0.5635388 | 0.6997388 |
| Q18PE0 | Dok7    | 0.825313  | 1.1116428 | 0.4819935 | 0.8743196 | 1.2222146 | 0.9612147 | 0.2506031 | 0.6500471 |
| Q8BL99 | Dopey1  | 0.2896603 | 0.317719  | 0.3922475 | 0.8743196 | -0.294775 | 0.5344556 | 0.601183  | 0.7066507 |
| Q66L44 | Dos     | 1.2838015 | 0.6293984 | 0.0530251 | 0.8743196 | -0.284131 | 0.699647  | 0.6889769 | 0.72435   |
| Q99KK7 | Dpp3    | 0.3711711 | 0.2747371 | 0.1801971 | 0.8743196 | -0.064782 | 0.271013  | 0.8117197 | 0.7465637 |
| Q8C811 | Dpp6    | -0.320256 | 0.6258439 | 0.6245906 | 0.8826986 | -0.513819 | 0.6172271 | 0.437021  | 0.6699704 |
| Q9ET22 | Dpp7    | 0.0923034 | 0.5983696 | 0.8817595 | 0.9006736 | -0.211398 | 0.7725654 | 0.7935432 | 0.7439428 |
| Q8QZY3 | Dppa3   | -0.554924 | 0.4837888 | 0.2890553 | 0.8743196 | -0.500518 | 0.3827328 | 0.2388287 | 0.6460374 |
| Q8CHR6 | Dpyd    | -0.060195 | 0.2128956 | 0.7776365 | 0.8940257 | 0.0895502 | 0.1727748 | 0.6048325 | 0.7081806 |
| Q9EQF5 | Dpys    | -0.140565 | 0.3102638 | 0.6642219 | 0.8900083 | -0.199468 | 0.1436505 | 0.2143181 | 0.6429844 |
| O08553 | Dpysl2  | 0.4180632 | 0.3620691 | 0.250547  | 0.8743196 | 0.5083531 | 0.3662082 | 0.1680568 | 0.6323131 |
| Q05AA6 | Drp2    | -1.76874  | 1.0552146 | 0.1376058 | 0.8743196 | -0.756669 | 0.9273257 | 0.4456947 | 0.6699704 |
| Q9ERC8 | Dscam   | 0.2454441 | 0.5881531 | 0.6889506 | 0.8900083 | -1.108284 | 1.8215343 | 0.565206  | 0.6997388 |
| Q4VA61 | Dscaml1 | -0.368751 | 0.4173078 | 0.4062124 | 0.8743196 | -2.08088  | 1.0784667 | 0.1019176 | 0.6209341 |
| O55111 | Dsg2    | 3.1497828 | 0.9345603 | 0.0119148 | 0.8743196 | 3.2927036 | 1.0394302 | 0.0193727 | 0.6209341 |
| Q9CYC5 | Dsn1    | 1.4273557 | 0.6038127 | 0.050053  | 0.8743196 | 1.3141894 | 0.5526549 | 0.054921  | 0.6209341 |
| E9Q557 | Dsp     | 0.9143459 | 0.6901246 | 0.2268152 | 0.8743196 | -0.736755 | 0.8633614 | 0.4262112 | 0.6694352 |
| P97399 | Dspp    | -1.266051 | 0.6014064 | 0.0525434 | 0.8743196 | 0.0937567 | 0.6048037 | 0.8791866 | 0.7585208 |
| Q91ZU6 | Dst     | -0.385082 | 0.5084174 | 0.4735225 | 0.8743196 | -0.459847 | 0.3668053 | 0.2566026 | 0.6500471 |
| Q9R0P5 | Dstn    | -0.18081  | 0.1976142 | 0.3620604 | 0.8743196 | -0.146296 | 0.1741998 | 0.4029367 | 0.6638484 |
| Q9DD18 | Dtd1    | -0.13323  | 2.2322256 | 0.954075  | 0.9060514 | 1.3422173 | 1.6109771 | 0.4366521 | 0.6699704 |
| Q9D8U7 | Dtwd1   | -0.700031 | 0.5934794 | 0.2767147 | 0.8743196 | -1.928034 | 0.7652688 | 0.0453226 | 0.6209341 |
| Q8R3P2 | Dtx2    | 0.6218942 | 0.7615982 | 0.4410767 | 0.8743196 | -1.116382 | 0.5312426 | 0.080316  | 0.6209341 |
| P97930 | Dtymk   | 0.4990677 | 0.4241328 | 0.2777822 | 0.8743196 | -0.009894 | 0.4614656 | 0.9835896 | 0.7770843 |
| Q9ESS0 | Dusp10  | 0.2067509 | 0.9472385 | 0.8334478 | 0.8943678 | 0.4319521 | 0.8424443 | 0.6264589 | 0.7115945 |
| Q6NXX5 | Dusp11  | -0.194325 | 0.717503  | 0.7943297 | 0.8943678 | -0.210192 | 0.2625884 | 0.4539632 | 0.6712964 |
| Q148W8 | Dusp27  | 0.1099055 | 0.7370103 | 0.8834427 | 0.9006736 | 0.2838445 | 0.5791626 | 0.6322341 | 0.7120542 |
| Q9D7X3 | Dusp3   | 0.2675934 | 0.2843341 | 0.3539183 | 0.8743196 | -0.326322 | 0.4546834 | 0.4791124 | 0.6788349 |
| Q9DBB1 | Dusp6   | -0.179372 | 0.5081461 | 0.7344842 | 0.8923639 | -0.451817 | 0.7826036 | 0.584716  | 0.7049451 |
| Q8VCG1 | Dut     | 1.1542253 | 1.3561565 | 0.4228696 | 0.8743196 | 1.4464965 | 1.495541  | 0.3707937 | 0.6594641 |
| Q8CHY3 | Dym     | 0.5501341 | 0.5970277 | 0.387468  | 0.8743196 | -1.010836 | 0.5151866 | 0.0974144 | 0.6209341 |
| Q9JHU4 | Dync1h1 | 0.3972162 | 0.3451832 | 0.2586383 | 0.8743196 | -0.510289 | 0.4581739 | 0.2752051 | 0.6500471 |
| Q45VK7 | Dync2h1 | 1.7409332 | 1.4670543 | 0.2740594 | 0.8743196 | 1.5947442 | 2.0364698 | 0.4633521 | 0.6730975 |
| Q9D0M5 | Dynll2  | -1.462754 | 0.8841665 | 0.1420242 | 0.8743196 | 0.0464122 | 0.9676988 | 0.9633036 | 0.7731036 |
| P62627 | Dynlrb1 | -0.092672 | 0.4606687 | 0.8462879 | 0.8962775 | -0.069885 | 0.4780195 | 0.8885541 | 0.7592752 |
| Q8C008 | Dzank1  | -1.046454 | 0.5311589 | 0.0578122 | 0.8743196 | -0.651859 | 0.3408057 | 0.0664485 | 0.6209341 |

|        |         |           |           |           |           |           |           |           |           |
|--------|---------|-----------|-----------|-----------|-----------|-----------|-----------|-----------|-----------|
| Q58FA4 | E2f8    | -0.576615 | 0.5120492 | 0.2972466 | 0.8743196 | -1.381156 | 0.9645095 | 0.2021175 | 0.6429844 |
| Q5BU09 | Eapp    | -1.325418 | 0.9939455 | 0.2241261 | 0.8743196 | 0.352897  | 0.53468   | 0.5337457 | 0.6957327 |
| O35292 | Ear5    | -1.016746 | 2.0750098 | 0.63912   | 0.8883187 | -0.5956   | 0.7500737 | 0.45741   | 0.6712964 |
| Q9CXJ1 | Ears2   | -0.000226 | 0.0046407 | 0.9624608 | 0.9067461 | -0.001245 | 0.0033283 | 0.721267  | 0.7303836 |
| O35228 | Ebi3    | 1.2439252 | 4.2963597 | 0.7805636 | 0.8940257 | -0.541728 | 4.5984823 | 0.9100663 | 0.7618305 |
| P70245 | Ebp     | -0.067102 | 0.4727145 | 0.8890078 | 0.9006736 | -0.700589 | 0.4955591 | 0.1809377 | 0.6395902 |
| Q9D0P0 | Ebpl    | -3.568616 | 2.4575724 | 0.1897788 | 0.8743196 | 1.6552725 | 1.4661047 | 0.3019951 | 0.6540599 |
| Q80Z60 | Ece2    | 0.8696263 | 1.1611385 | 0.4782977 | 0.8743196 | -0.068027 | 1.7317357 | 0.9699396 | 0.7751233 |
| O35459 | Ech1    | 0.4130591 | 0.2395685 | 0.0868363 | 0.8743196 | 0.0523651 | 0.2877656 | 0.8559    | 0.7553078 |
| Q9D9V3 | Echdc1  | 0.0289016 | 0.3048565 | 0.9247375 | 0.9048359 | 0.0044578 | 0.2831706 | 0.9874903 | 0.7775007 |
| Q3TLP5 | Echdc2  | -0.191665 | 0.324873  | 0.5573221 | 0.8753373 | -0.173816 | 0.2745215 | 0.5292535 | 0.6933955 |
| Q9D7J9 | Echdc3  | 0.1780578 | 0.2934104 | 0.5456869 | 0.8753373 | 0.0426396 | 0.3820078 | 0.911449  | 0.7624298 |
| Q8BH95 | Echs1   | -0.017904 | 0.2787412 | 0.948872  | 0.9060514 | 0.4146021 | 0.25047   | 0.1002401 | 0.6209341 |
| P42125 | Eci1    | -0.293664 | 0.2830884 | 0.3019991 | 0.8743196 | 0.0552544 | 0.2670903 | 0.8365745 | 0.7519044 |
| Q9WUR2 | Eci2    | 0.1864648 | 0.2843104 | 0.5138266 | 0.8753373 | 0.5150333 | 0.2863089 | 0.076412  | 0.6209341 |
| Q6PDI5 | Ecm29   | -0.440009 | 0.345959  | 0.212884  | 0.8743196 | -0.078969 | 0.4221112 | 0.8529953 | 0.7541624 |
| Q9QZH6 | Ecsit   | -0.057746 | 0.5598063 | 0.9207337 | 0.9048359 | -0.467263 | 0.3735652 | 0.2575643 | 0.6500471 |
| Q8BX35 | Eda2r   | -0.640662 | 0.690114  | 0.384124  | 0.8743196 | -0.820328 | 0.2337552 | 0.0126815 | 0.6209341 |
| Q3UJB9 | Edc4    | -0.030054 | 0.521388  | 0.9547942 | 0.9060514 | 0.0772412 | 0.4207459 | 0.8571741 | 0.7556239 |
| Q2HXL6 | Edem3   | -0.670193 | 0.8534108 | 0.4580226 | 0.8743196 | 1.0254221 | 0.3469364 | 0.025426  | 0.6209341 |
| Q9JMG1 | Edf1    | 1.0903207 | 1.3577981 | 0.4483734 | 0.8743196 | -0.799956 | 1.48623   | 0.6097784 | 0.7082928 |
| P22387 | Edn1    | -0.617642 | 1.6610766 | 0.7210181 | 0.8910745 | 0.334113  | 0.8115912 | 0.6948786 | 0.7260121 |
| Q6GQV7 | Edrf1   | 0.7451389 | 0.8260868 | 0.3970255 | 0.8743196 | 1.2952803 | 0.6011712 | 0.0746315 | 0.6209341 |
| Q8BL66 | Eea1    | -0.506094 | 0.4356794 | 0.2542559 | 0.8743196 | -0.078057 | 0.3122166 | 0.8044721 | 0.7453194 |
| P10126 | Eef1a1  | 0.2039297 | 0.1948527 | 0.2972792 | 0.8743196 | 0.2800575 | 0.1820791 | 0.1268677 | 0.6209341 |
| P62631 | Eef1a2  | -0.042883 | 0.3447506 | 0.9016462 | 0.9036268 | -0.186912 | 0.4273598 | 0.6646133 | 0.7215904 |
| O70251 | Eef1b   | -0.196139 | 0.2239618 | 0.3841074 | 0.8743196 | -0.380104 | 0.3525334 | 0.285119  | 0.6518056 |
| P57776 | Eef1d   | 0.6551328 | 0.4940081 | 0.1890378 | 0.8743196 | 0.2856186 | 0.5640386 | 0.6143849 | 0.7084882 |
| Q9D1M4 | Eef1e1  | 2.1546552 | 1.2316406 | 0.0935523 | 0.8743196 | 0.8770572 | 1.6119979 | 0.5924003 | 0.7054772 |
| Q9DN80 | Eef1g   | 0.2659435 | 0.297611  | 0.3728896 | 0.8743196 | 0.2853663 | 0.3172503 | 0.3699426 | 0.6594641 |
| P58252 | Eef2    | -0.056885 | 0.1750721 | 0.7454516 | 0.8923639 | 0.0093989 | 0.1792406 | 0.9582179 | 0.7721509 |
| Q9JHW4 | Eefsec  | -1.123561 | 0.7453373 | 0.1754256 | 0.8743196 | -1.233918 | 0.9150161 | 0.2261646 | 0.6442378 |
| Q80X60 | Efcab3  | 0.5645545 | 0.4936685 | 0.2707169 | 0.8743196 | 0.009342  | 0.4504056 | 0.983767  | 0.7770843 |
| Q6P1E8 | Efcab6  | 0.5542529 | 0.5346968 | 0.3344098 | 0.8743196 | -0.411554 | 0.695148  | 0.5754395 | 0.7015295 |
| P52793 | Efna1   | 0.0293262 | 0.6677343 | 0.9661956 | 0.9067656 | -0.623945 | 0.7787545 | 0.4535617 | 0.6712964 |
| O08545 | Efna3   | -0.005656 | 0.7713426 | 0.9943541 | 0.9101811 | -1.518293 | 0.8594257 | 0.1277171 | 0.6209341 |
| O08543 | Efna5   | 1.5629316 | 1.2568134 | 0.2536887 | 0.8743196 | 0.8257028 | 1.4818378 | 0.5975371 | 0.706009  |
| Q64355 | Efs     | 0.4632407 | 0.3127926 | 0.1821602 | 0.8743196 | -0.182162 | 0.3771475 | 0.6462142 | 0.7175625 |
| Q8C0D5 | Eftud1  | 0.1298217 | 0.2507688 | 0.6122216 | 0.8792876 | -1.737079 | 0.9933792 | 0.1039073 | 0.6209341 |
| Q01279 | Egfr    | -0.182584 | 0.56389   | 0.7482684 | 0.8923639 | -0.206245 | 0.5315402 | 0.7010478 | 0.7266885 |
| Q69ZW3 | Ehbp1   | -0.746684 | 1.2910401 | 0.5811439 | 0.8753373 | 0.6294044 | 0.833599  | 0.4788016 | 0.6788349 |
| Q99MS7 | Ehbp111 | 0.52099   | 0.9116694 | 0.5855553 | 0.8753373 | 1.016151  | 0.8113018 | 0.2569956 | 0.6500471 |
| Q9WVK4 | Ehd1    | 0.3164428 | 0.5959565 | 0.6032046 | 0.8792876 | 0.1097743 | 0.6541981 | 0.8693231 | 0.7571111 |
| Q9QXY6 | Ehd3    | 0.5013239 | 0.8601083 | 0.5782715 | 0.8753373 | -0.168305 | 1.0486571 | 0.8777576 | 0.7585027 |
| Q9EQP2 | Ehd4    | 0.32586   | 0.3223821 | 0.3457737 | 0.8743196 | -0.359659 | 0.3525029 | 0.3469497 | 0.6594641 |
| Q9DBM2 | Ehhadh  | -0.07057  | 0.2156479 | 0.7439601 | 0.8923639 | 0.1778579 | 0.2082827 | 0.39478   | 0.6617584 |
| Q61070 | Ei24    | -0.557553 | 0.731971  | 0.4711099 | 0.8743196 | -0.057906 | 0.2932852 | 0.8500034 | 0.7537615 |
| Q3V124 | Eid3    | -1.084904 | 0.875982  | 0.2554496 | 0.8743196 | -0.559463 | 0.6521568 | 0.423904  | 0.6694352 |
| P48024 | Eif1    | -0.503211 | 0.6220667 | 0.4451728 | 0.8743196 | -0.662081 | 0.5434526 | 0.2688419 | 0.6500471 |
| Q8BJW6 | Eif2a   | -0.643434 | 0.5853118 | 0.2830105 | 0.8743196 | -0.350667 | 0.3802804 | 0.3674525 | 0.6594641 |
| Q99LC8 | Eif2b1  | 0.2789057 | 1.4564257 | 0.8535701 | 0.8962775 | 1.7493841 | 1.0924899 | 0.1604334 | 0.6243427 |
| Q99LD9 | Eif2b2  | -0.538564 | 0.2122975 | 0.0227845 | 0.8743196 | -1.497503 | 0.8164924 | 0.0896289 | 0.6209341 |
| Q8CGT7 | Eif2c5  | 0.2602411 | 0.8563983 | 0.7700543 | 0.8923639 | 0.5761197 | 0.6672855 | 0.4210965 | 0.6694352 |
| Q61211 | Eif2d   | -0.253381 | 0.2831372 | 0.4005605 | 0.8743196 | -1.244535 | 1.4787923 | 0.4322749 | 0.6694352 |
| Q6ZWX6 | Eif2s1  | 1.0829638 | 0.4745675 | 0.0280271 | 0.8743196 | 0.5965379 | 0.60171   | 0.3284917 | 0.6594641 |
| Q99L45 | Eif2s2  | -0.305652 | 0.4329643 | 0.4854901 | 0.8743196 | -0.127098 | 0.2790352 | 0.6523981 | 0.7194773 |
| Q9Z0N1 | Eif2s3x | -0.099228 | 0.7157899 | 0.893649  | 0.9006736 | 0.661829  | 0.7122263 | 0.3886208 | 0.6611124 |
| P23116 | Eif3a   | 0.0881924 | 0.1876608 | 0.6390639 | 0.8883187 | -0.017298 | 0.1635779 | 0.9159414 | 0.7627031 |
| Q8JZQ9 | Eif3b   | -0.2649   | 0.3334838 | 0.429158  | 0.8743196 | -0.087005 | 0.3020347 | 0.7740823 | 0.7428116 |
| Q8R1B4 | Eif3c   | 0.4396033 | 0.2117329 | 0.041126  | 0.8743196 | 0.365593  | 0.2641304 | 0.1707768 | 0.6323131 |
| O70194 | Eif3d   | -0.634515 | 0.6417273 | 0.3330684 | 0.8743196 | -0.489727 | 0.536409  | 0.3721316 | 0.6594641 |

|        |           |           |           |           |           |           |           |           |           |
|--------|-----------|-----------|-----------|-----------|-----------|-----------|-----------|-----------|-----------|
| P60229 | Eif3e     | 0.3816667 | 0.4718827 | 0.4269083 | 0.8743196 | -0.721475 | 0.6628838 | 0.2893656 | 0.652142  |
| Q9DCH4 | Eif3f     | -0.771747 | 0.4298114 | 0.082321  | 0.8743196 | -0.590386 | 0.4442247 | 0.1949617 | 0.6418859 |
| Q9Z1D1 | Eif3g     | -0.045966 | 0.5559371 | 0.9348195 | 0.9048359 | 0.2680478 | 0.4065148 | 0.5171729 | 0.6910975 |
| Q91WK2 | Eif3h     | -0.342687 | 0.4639468 | 0.465685  | 0.8743196 | -0.375878 | 0.7279201 | 0.609798  | 0.7082928 |
| Q9QZD9 | Eif3i     | -0.17059  | 0.3897079 | 0.6646118 | 0.8900083 | -0.225132 | 0.4031188 | 0.5811215 | 0.7031064 |
| Q9DBZ5 | Eif3k     | -0.51652  | 0.6529258 | 0.4412237 | 0.8743196 | -0.184962 | 0.155611  | 0.2558493 | 0.6500471 |
| Q8QZY1 | Eif3l     | -0.03668  | 0.5745751 | 0.9495087 | 0.9060514 | 0.1531453 | 0.596054  | 0.7991792 | 0.7439428 |
| Q99JX4 | Eif3m     | 0.624229  | 0.8067271 | 0.4643865 | 0.8743196 | 1.2476458 | 0.826856  | 0.1820576 | 0.6395902 |
| P60843 | Eif4a1    | 0.760504  | 0.6183326 | 0.2311572 | 0.8743196 | -0.094526 | 0.8129805 | 0.9085976 | 0.7612577 |
| P10630 | Eif4a2    | 0.4545173 | 0.5260356 | 0.3964863 | 0.8743196 | -0.502731 | 0.6876369 | 0.4731978 | 0.6774295 |
| Q8BGD9 | Eif4b     | 0.3199991 | 0.4600617 | 0.489635  | 0.8743196 | 0.032176  | 0.5168381 | 0.9506179 | 0.7706093 |
| P63073 | Eif4e     | -0.695196 | 0.3726366 | 0.0817747 | 0.8743196 | -0.337975 | 0.3143325 | 0.3018303 | 0.6540599 |
| Q9EST3 | Eif4enif1 | 0.154209  | 0.4023546 | 0.712896  | 0.8910745 | -0.391233 | 0.8222615 | 0.6510447 | 0.7191997 |
| Q6NZJ6 | Eif4g1    | -0.231031 | 0.5096561 | 0.6521113 | 0.8900083 | -0.457793 | 0.5563297 | 0.4146456 | 0.6675611 |
| Q62448 | Eif4g2    | -0.055442 | 0.2638157 | 0.839534  | 0.8951804 | -0.656549 | 0.8980727 | 0.4922901 | 0.6814973 |
| Q80X13 | Eif4g3    | 1.5334423 | 1.3670052 | 0.2989675 | 0.8743196 | 1.5806405 | 1.6607255 | 0.3779599 | 0.6594641 |
| Q9WUK2 | Eif4h     | -1.106798 | 1.1954568 | 0.385338  | 0.8743196 | -0.441105 | 0.91678   | 0.6474562 | 0.7178825 |
| P59325 | Eif5      | -0.172605 | 0.4478689 | 0.7016855 | 0.8907355 | -1.187025 | 0.5168994 | 0.0268339 | 0.6209341 |
| P63242 | Eif5a     | 0.2836274 | 0.6730763 | 0.6763782 | 0.8900083 | 0.0106679 | 0.7068506 | 0.9880696 | 0.7775007 |
| Q05D44 | Eif5b     | -0.016213 | 0.8559392 | 0.9854163 | 0.9078335 | 0.2080667 | 0.6014163 | 0.74118   | 0.7346307 |
| O55135 | Eif6      | -0.214791 | 0.3870157 | 0.5815312 | 0.8753373 | 0.4979491 | 0.2804447 | 0.083227  | 0.6209341 |
| P70372 | Elavl1    | -1.548348 | 0.9978047 | 0.1646606 | 0.8743196 | -0.42153  | 0.6278758 | 0.5269796 | 0.69337   |
| Q8C8T7 | Elfn1     | -0.268534 | 1.1292302 | 0.8188449 | 0.8943678 | -0.234857 | 0.6274793 | 0.7210626 | 0.7303836 |
| Q68FM6 | Elfn2     | 1.62164   | 1.1499285 | 0.2013312 | 0.8743196 | 0.4581322 | 1.1203331 | 0.6967904 | 0.7265263 |
| P41969 | Elk1      | 1.2204342 | 1.0961207 | 0.3022978 | 0.8743196 | 1.3846363 | 1.2515593 | 0.3109579 | 0.6577795 |
| E9Q2I4 | Elmsan1   | -0.666699 | 1.0569021 | 0.5482023 | 0.8753373 | 0.0013861 | 1.1341525 | 0.9990645 | 0.7804977 |
| Q9JLJ4 | Elov12    | 0.980404  | 2.0440595 | 0.6461097 | 0.8896469 | 1.9790652 | 1.8447474 | 0.3245971 | 0.6594641 |
| P21995 | Emb       | -1.679417 | 0.8838647 | 0.0991938 | 0.8743196 | -1.420176 | 1.3271327 | 0.325718  | 0.6594641 |
| Q8C7X2 | Emc1      | -0.143273 | 0.5703273 | 0.8088649 | 0.8943678 | -0.204489 | 0.8753654 | 0.8230587 | 0.7490596 |
| Q9R0H2 | Emcn      | -0.032529 | 1.4743853 | 0.9830134 | 0.9077764 | 0.095435  | 1.980016  | 0.9631219 | 0.7731036 |
| Q91VF6 | Emid2     | 0.9128658 | 1.142633  | 0.4505921 | 0.8743196 | 2.8652017 | 1.0847211 | 0.0384674 | 0.6209341 |
| Q3UUU0 | Emilin1   | 1.8721516 | 0.5162335 | 0.0084363 | 0.8743196 | 0.8486033 | 0.8011176 | 0.3302436 | 0.6594641 |
| P59900 | Emilin3   | 0.2189762 | 0.7764112 | 0.7860719 | 0.8943678 | 0.7353889 | 1.0818247 | 0.5219997 | 0.6929797 |
| Q05BC3 | Eml1      | 0.2821898 | 0.3828077 | 0.4849952 | 0.8743196 | -0.728958 | 0.3373    | 0.0739589 | 0.6209341 |
| Q7TNG5 | Eml2      | 0.2070256 | 0.2654563 | 0.4401655 | 0.8743196 | -0.189259 | 0.3122583 | 0.5484745 | 0.6980496 |
| Q3UMY5 | Eml4      | -0.210138 | 0.2876964 | 0.4888551 | 0.8743196 | -0.382181 | 0.2573055 | 0.1880015 | 0.6405321 |
| O35709 | Enc1      | -0.162689 | 0.543678  | 0.7734471 | 0.8935551 | -0.158306 | 0.6534814 | 0.816654  | 0.7474231 |
| O08600 | Endog     | 0.5019765 | 0.4855589 | 0.317605  | 0.8743196 | -0.037108 | 0.7839614 | 0.9629664 | 0.7731036 |
| Q8C7D8 | Enho      | -0.193589 | 0.8577218 | 0.8278818 | 0.8943678 | 1.0314186 | 0.3184676 | 0.017716  | 0.6209341 |
| B0QZL1 | Eno1      | 0.2036674 | 0.555968  | 0.724941  | 0.8910745 | -0.547911 | 0.9054504 | 0.5672625 | 0.6997388 |
| P17182 | Eno1      | -0.092864 | 0.2558872 | 0.7170428 | 0.8910745 | -0.185347 | 0.2624404 | 0.4809445 | 0.6794597 |
| P21550 | Eno3      | 0.0183845 | 0.1812248 | 0.9192913 | 0.9048359 | 0.1984874 | 0.1878866 | 0.2921313 | 0.6532982 |
| Q8BTJ4 | Enpp4     | 0.4838651 | 0.9644895 | 0.6312834 | 0.8855458 | 0.8555762 | 0.5336584 | 0.1600051 | 0.6243427 |
| Q9JL74 | ENSMUSG00 | -0.116879 | 0.7316424 | 0.8775903 | 0.9006736 | -0.142577 | 0.5719114 | 0.8114445 | 0.7465637 |
| Q8C3W3 | ENSMUSG00 | 0.5625649 | 0.7855718 | 0.4971047 | 0.8748057 | 0.5059507 | 0.7892688 | 0.5451898 | 0.6979269 |
| Q9DBT4 | Entpd4    | 0.1156004 | 0.5829887 | 0.8484545 | 0.8962775 | -2.170981 | 1.3687594 | 0.163813  | 0.6273856 |
| Q9WUZ9 | Entpd5    | -0.435825 | 0.3457625 | 0.2121463 | 0.8743196 | -0.018786 | 0.3199169 | 0.9533878 | 0.7711907 |
| Q3U0P5 | Entpd6    | 0.0282774 | 0.1812639 | 0.8804357 | 0.9006736 | -0.305899 | 0.1923562 | 0.1628767 | 0.6273856 |
| Q8CHI8 | Ep400     | -0.237908 | 0.8460706 | 0.7824056 | 0.8940257 | -0.320426 | 0.7814194 | 0.6884414 | 0.72435   |
| P52963 | Epb4114a  | 0.1029903 | 0.7144763 | 0.8873025 | 0.9006736 | 0.5654982 | 0.6892167 | 0.426724  | 0.6694352 |
| Q8C0I4 | Epc2      | -0.487207 | 0.5982538 | 0.4422459 | 0.8743196 | 0.0297099 | 0.6039417 | 0.9623619 | 0.7730074 |
| Q80TA9 | Epg5      | 0.4721561 | 0.9808382 | 0.64493   | 0.8896469 | 1.9244833 | 1.0470208 | 0.1156893 | 0.6209341 |
| Q60750 | Epha1     | 0.1258106 | 0.7352355 | 0.8689738 | 0.898064  | -0.782899 | 0.7959463 | 0.3632933 | 0.6594641 |
| Q03145 | Epha2     | -0.244784 | 0.4796113 | 0.6254812 | 0.8827583 | 0.6465937 | 0.3921792 | 0.1503005 | 0.6209341 |
| Q8CBY9 | Epha5     | -1.268819 | 0.5902786 | 0.0686617 | 0.8743196 | -0.728406 | 0.4360485 | 0.1458626 | 0.6209341 |
| Q61772 | Epha7     | 0.3705941 | 0.6335237 | 0.5769273 | 0.8753373 | -1.037829 | 1.6037557 | 0.5415028 | 0.6979269 |
| Q9D379 | Ephx1     | -0.280537 | 0.2101186 | 0.1839526 | 0.8743196 | -0.171423 | 0.177644  | 0.3364164 | 0.6594641 |
| P34914 | Ephx2     | -0.021326 | 0.2054125 | 0.9174033 | 0.9048359 | -0.00458  | 0.1984989 | 0.9816154 | 0.7765385 |
| Q3V1F8 | Ephx3     | 0.3674342 | 0.5947527 | 0.5562685 | 0.8753373 | -0.711142 | 0.6458238 | 0.3130381 | 0.6594641 |
| P14753 | Epor      | -1.150823 | 1.1662563 | 0.3566291 | 0.8743196 | -1.701546 | 0.9531007 | 0.1244646 | 0.6209341 |
| Q8R0W0 | Eppk1     | 0.5374622 | 0.5094378 | 0.3023775 | 0.8743196 | 0.4198115 | 0.6072041 | 0.4972717 | 0.6823283 |

|        |         |           |           |           |           |           |           |           |           |
|--------|---------|-----------|-----------|-----------|-----------|-----------|-----------|-----------|-----------|
| Q8CGC7 | Eprs    | 0.0511859 | 0.1641316 | 0.7554289 | 0.8923639 | 0.0376392 | 0.1759557 | 0.8308309 | 0.7517136 |
| Q60902 | Eps151l | -0.286618 | 0.276091  | 0.3337348 | 0.8743196 | -0.286769 | 0.1379298 | 0.0828388 | 0.6209341 |
| Q99K30 | Eps8l2  | 4.7497984 | 4.3610674 | 0.3121625 | 0.8743196 | 3.5829289 | 4.8534571 | 0.4882373 | 0.6803412 |
| Q9D9V2 | Eqtn    | -0.568703 | 0.7085526 | 0.4485791 | 0.8743196 | -0.594901 | 0.8963256 | 0.5315352 | 0.6939525 |
| Q9EQH2 | Erap1   | 0.0962539 | 0.4177864 | 0.8209011 | 0.8943678 | -0.592569 | 0.3513946 | 0.1155669 | 0.6209341 |
| Q80TH2 | Erbb2ip | 0.2999374 | 1.4759901 | 0.8447509 | 0.8962775 | -0.526345 | 1.4038153 | 0.7206018 | 0.7303836 |
| Q61526 | Erbb3   | -0.695477 | 0.5616675 | 0.2281186 | 0.8743196 | -0.961889 | 0.5381452 | 0.0890354 | 0.6209341 |
| Q99MI1 | Erc1    | -0.606261 | 0.4592334 | 0.2065737 | 0.8743196 | -0.907614 | 0.5201671 | 0.1045884 | 0.6209341 |
| O08811 | Ercc2   | 0.3030066 | 0.4538519 | 0.525759  | 0.8753373 | -0.330464 | 0.5491451 | 0.5693462 | 0.6997388 |
| P49135 | Ercc3   | -0.275249 | 0.5608568 | 0.6386027 | 0.8883187 | -0.073665 | 0.6707697 | 0.9161317 | 0.7627031 |
| F8VPZ5 | Ercc6   | -1.74134  | 1.8143161 | 0.3691373 | 0.8743196 | -1.482132 | 0.4367122 | 0.0146063 | 0.6209341 |
| Q9CQE7 | Ergic3  | -0.202685 | 0.6644891 | 0.7692182 | 0.8923639 | 0.2251089 | 0.7505984 | 0.7743676 | 0.7428116 |
| Q5BKS4 | Eri2    | 1.0411256 | 4.0120039 | 0.8027139 | 0.8943678 | 1.1615113 | 4.6200389 | 0.8098884 | 0.7465637 |
| Q9D1Q6 | Erp44   | -0.57527  | 0.3313396 | 0.0881288 | 0.8743196 | -0.069295 | 0.2662616 | 0.7957827 | 0.7439428 |
| Q8CIB9 | Esco2   | -0.343627 | 0.8412523 | 0.6951341 | 0.8900083 | -0.208609 | 0.9492951 | 0.8333505 | 0.7519044 |
| Q9R0P3 | Esd     | -0.082771 | 0.2684566 | 0.7584167 | 0.8923639 | 0.1016974 | 0.2687781 | 0.7059831 | 0.7280735 |
| Q3V1V3 | Esf1    | -0.459027 | 0.7423095 | 0.5559053 | 0.8753373 | -0.485347 | 0.8289923 | 0.5795723 | 0.7022002 |
| Q8K0G8 | Esrp2   | 1.7672345 | 1.1215497 | 0.1590965 | 0.8743196 | 1.1140277 | 1.2401129 | 0.4036177 | 0.6638484 |
| Q3U7R1 | Esytl   | -0.14121  | 0.4938394 | 0.7788324 | 0.8940257 | 0.2618106 | 0.5015034 | 0.6104151 | 0.7082928 |
| Q5SVT3 | Etaa1   | 0.6347575 | 0.5211357 | 0.2420267 | 0.8743196 | 0.4027778 | 0.5641329 | 0.4878633 | 0.6803412 |
| Q8BWY3 | Etf1    | 0.3988721 | 0.5236891 | 0.4580729 | 0.8743196 | -0.465774 | 0.7127127 | 0.5248102 | 0.69337   |
| Q99LC5 | Etf2    | -0.350525 | 0.1899177 | 0.0662664 | 0.8743196 | -0.312848 | 0.2055931 | 0.1297079 | 0.6209341 |
| Q9DCW4 | Etfb    | 0.1214006 | 0.2613272 | 0.6427391 | 0.8891711 | -0.07234  | 0.2846861 | 0.7997028 | 0.7439428 |
| Q921G7 | Etfhdh  | 0.1210933 | 0.1882843 | 0.5212239 | 0.8753373 | -0.001951 | 0.218573  | 0.9928923 | 0.7789098 |
| Q9DCM0 | Ethe1   | 0.7555707 | 0.4966427 | 0.1321631 | 0.8743196 | 0.5439804 | 0.6344874 | 0.3942173 | 0.6617584 |
| A7MCT6 | Etnk2   | 0.7803053 | 1.1392029 | 0.5154034 | 0.8753373 | -0.135573 | 1.2968115 | 0.9201456 | 0.7627031 |
| P15037 | Ets2    | 0.3787667 | 0.7334775 | 0.6214841 | 0.8826986 | 0.8173586 | 0.5029357 | 0.1552506 | 0.6211692 |
| Q3TYM4 | Etv4    | 0.3645317 | 1.0725709 | 0.7439265 | 0.8923639 | 1.0295093 | 0.9971826 | 0.3416837 | 0.6594641 |
| Q8K1G2 | Evc2    | 0.974646  | 0.6284851 | 0.1648893 | 0.8743196 | 0.5886257 | 0.5826774 | 0.3513849 | 0.6594641 |
| Q61545 | Ewsr1   | -0.193935 | 0.5276564 | 0.7240775 | 0.8910745 | -1.557309 | 1.2314355 | 0.2529045 | 0.6500471 |
| Q9QZ11 | Exo1    | -0.187737 | 0.8465541 | 0.8308264 | 0.8943678 | -0.240112 | 0.6680268 | 0.7315813 | 0.7326734 |
| Q6KAR6 | Exoc3   | -0.550498 | 0.7827795 | 0.5046047 | 0.8753373 | -0.316838 | 0.904446  | 0.7380746 | 0.7346307 |
| A6H5Z3 | Exoc6b  | 0.8725031 | 0.6211285 | 0.2028951 | 0.8743196 | -1.559264 | 2.0886221 | 0.4835495 | 0.6796099 |
| O35250 | Exoc7   | 0.4204426 | 1.7189254 | 0.8137841 | 0.8943678 | 0.5673315 | 2.1146699 | 0.7974664 | 0.7439428 |
| Q6PGF7 | Exoc8   | -0.19032  | 0.3549798 | 0.6084674 | 0.8792876 | -0.565339 | 0.2606322 | 0.0731519 | 0.6209341 |
| Q0VAV2 | Exph5   | -1.401328 | 1.2503474 | 0.299366  | 0.8743196 | -0.471644 | 0.4576567 | 0.342486  | 0.6594641 |
| Q9JKV7 | Extl1   | 0.0376807 | 0.6781705 | 0.9572431 | 0.9063776 | -0.039944 | 0.4829446 | 0.9367736 | 0.7675258 |
| Q9WVL6 | Extl3   | -0.517628 | 0.35718   | 0.1905542 | 0.8743196 | -0.382991 | 0.330379  | 0.2904012 | 0.652142  |
| Q9Z191 | Eya4    | -0.037357 | 0.5795391 | 0.9504062 | 0.9060514 | -1.060685 | 1.2256053 | 0.420051  | 0.6694352 |
| Q61188 | Ezh2    | 0.4579577 | 0.6254436 | 0.4878243 | 0.8743196 | 0.3483209 | 0.5008361 | 0.5127773 | 0.688431  |
| P26040 | Ezr     | 1.0394983 | 0.4484421 | 0.0257834 | 0.8743196 | 0.6830139 | 0.5095567 | 0.1890013 | 0.6405321 |
| O88947 | F10     | 0.3978421 | 1.0838659 | 0.7244206 | 0.8910745 | 1.236984  | 1.0485797 | 0.2827792 | 0.6508436 |
| Q91Y47 | F11     | -0.166511 | 0.3190198 | 0.6178125 | 0.8816934 | -0.057522 | 0.1168757 | 0.6400895 | 0.7151423 |
| O88792 | F11r    | 0.1630298 | 0.7835343 | 0.8379733 | 0.8947711 | 0.5884561 | 0.6777818 | 0.401024  | 0.6629633 |
| Q80YC5 | F12     | 0.3775203 | 0.8211742 | 0.659646  | 0.8900083 | 0.8162106 | 1.0838272 | 0.479896  | 0.6791779 |
| P19221 | F2      | -0.324383 | 0.3701054 | 0.3845919 | 0.8743196 | 0.214447  | 0.3044156 | 0.4845535 | 0.6796099 |
| O88783 | F5      | -0.103619 | 1.5867942 | 0.9497602 | 0.9060514 | 0.284792  | 0.501108  | 0.5904344 | 0.7051736 |
| O08914 | Faah    | -0.758994 | 0.7539548 | 0.3300507 | 0.8743196 | -0.124028 | 0.4713263 | 0.7965627 | 0.7439428 |
| A2ACJ2 | Faap100 | -0.373946 | 0.4344585 | 0.402942  | 0.8743196 | -0.867263 | 0.4856903 | 0.0974945 | 0.6209341 |
| P12710 | Fabp1   | 0.2918094 | 0.3184598 | 0.3612385 | 0.8743196 | 0.1082521 | 0.2991044 | 0.7180994 | 0.7303836 |
| P55050 | Fabp2   | 0.1616113 | 0.4981821 | 0.7473672 | 0.8923639 | 0.3460693 | 0.4531572 | 0.4503223 | 0.6706145 |
| P11404 | Fabp3   | 0.1357269 | 0.2331639 | 0.5614638 | 0.8753373 | 0.4935081 | 0.2379642 | 0.0402665 | 0.6209341 |
| P04117 | Fabp4   | -0.051979 | 0.2421219 | 0.8305199 | 0.8943678 | -0.398482 | 0.3675751 | 0.2817548 | 0.6508436 |
| Q05816 | Fabp5   | -0.027599 | 0.2571771 | 0.91481   | 0.9048359 | -0.09502  | 0.2940286 | 0.7475476 | 0.7370067 |
| Q61160 | Fadd    | 0.7936693 | 1.0974958 | 0.493029  | 0.8748057 | -0.146926 | 1.1491848 | 0.9024435 | 0.7610813 |
| Q0VAX3 | Fads2p1 | -0.57769  | 1.4175379 | 0.6957936 | 0.8900083 | 1.2104957 | 0.5682315 | 0.0771788 | 0.6209341 |
| P54731 | Faf1    | 0.2087843 | 0.4296343 | 0.6340193 | 0.8878094 | -0.10279  | 0.4111785 | 0.8065034 | 0.745845  |
| Q3TDN2 | Faf2    | 0.3838939 | 0.353293  | 0.3132013 | 0.8743196 | -0.168499 | 0.6895497 | 0.8150933 | 0.7474231 |
| P35505 | Fah     | 0.180899  | 0.2335674 | 0.4400721 | 0.8743196 | 0.2219389 | 0.2297575 | 0.336159  | 0.6594641 |
| Q8R0F8 | Fahd1   | 0.7245131 | 0.4205314 | 0.09149   | 0.8743196 | 0.4928515 | 0.5260117 | 0.3542662 | 0.6594641 |
| Q3TC72 | Fahd2   | 0.2652984 | 0.3480491 | 0.449171  | 0.8743196 | 0.2140741 | 0.2896361 | 0.4634369 | 0.6730975 |

|        |          |           |           |           |           |           |           |           |           |
|--------|----------|-----------|-----------|-----------|-----------|-----------|-----------|-----------|-----------|
| E9Q4R1 | Fam102b  | 0.0457378 | 1.20233   | 0.9707172 | 0.9072902 | 0.6378524 | 1.0855956 | 0.5782538 | 0.7021424 |
| Q8BQS4 | Fam102b  | 3.8061835 | 4.6444935 | 0.4395056 | 0.8743196 | 3.4922207 | 5.2403662 | 0.5299259 | 0.6933955 |
| Q3UCV8 | Fam105b  | -0.190868 | 1.265791  | 0.8843952 | 0.9006736 | -0.307039 | 1.7656569 | 0.8676665 | 0.7571111 |
| Q8BH49 | Fam109a  | 1.147089  | 0.7137914 | 0.1520816 | 0.8743196 | 0.3655976 | 0.9279983 | 0.707228  | 0.7282267 |
| Q8VE88 | Fam114a2 | -0.283012 | 0.2969668 | 0.3723255 | 0.8743196 | -0.39916  | 0.1700304 | 0.0572478 | 0.6209341 |
| Q8BNE1 | Fam115a  | -0.731876 | 1.1816687 | 0.5552945 | 0.8753373 | -0.118984 | 0.2950249 | 0.7007058 | 0.7266885 |
| Q6A0A9 | FAM120A  | -2.499219 | 3.0889814 | 0.4450969 | 0.8743196 | 0.5938931 | 1.1258662 | 0.6167752 | 0.7091807 |
| Q78HU3 | Fam125a  | -0.375127 | 0.7174737 | 0.6172183 | 0.8816934 | -0.5349   | 1.1893055 | 0.6686766 | 0.7220514 |
| Q8R1F1 | Fam129b  | -1.061294 | 0.5542096 | 0.0970455 | 0.8743196 | -0.825909 | 0.848419  | 0.3679158 | 0.6594641 |
| Q9CQV4 | Fam134c  | -1.361201 | 0.8612676 | 0.1580131 | 0.8743196 | -1.573564 | 0.55093   | 0.0289456 | 0.6209341 |
| Q6NS59 | Fam135a  | 1.6663127 | 1.0101269 | 0.1430104 | 0.8743196 | 0.2806537 | 1.108006  | 0.8084949 | 0.7459407 |
| Q9CR98 | Fam136a  | -0.874558 | 0.6278145 | 0.1839163 | 0.8743196 | 0.4574712 | 0.5814895 | 0.4455496 | 0.6699704 |
| Q8BG14 | Fam13a   | -4.455408 | 4.6882319 | 0.37359   | 0.8743196 | -9.793779 | 3.273075  | 0.0242504 | 0.6209341 |
| Q9D1Y9 | Fam159b  | 0.1417358 | 0.8120944 | 0.8663887 | 0.898064  | -0.650624 | 1.010728  | 0.5435637 | 0.6979269 |
| Q505K2 | Fam160a1 | 0.47984   | 0.6509969 | 0.4724434 | 0.8743196 | -0.144759 | 1.0595353 | 0.8934204 | 0.7595603 |
| Q3U2I3 | Fam160a2 | 0.9326226 | 0.5788446 | 0.1511758 | 0.8743196 | -0.602125 | 1.5106076 | 0.7039875 | 0.7278106 |
| Q9D6U8 | Fam162a  | -1.50284  | 0.7257603 | 0.0771357 | 0.8743196 | 0.3708145 | 0.5733757 | 0.5417459 | 0.6979269 |
| Q6PFX1 | Fam172a  | 1.0331334 | 1.0634105 | 0.3636507 | 0.8743196 | 1.6195783 | 0.9206732 | 0.1290515 | 0.6209341 |
| Q3TCJ1 | Fam175b  | 0.3816201 | 0.9103621 | 0.6876373 | 0.8900083 | -0.103993 | 1.3992896 | 0.9431729 | 0.7691222 |
| Q3TYG6 | Fam179a  | 1.0570336 | 2.1826768 | 0.6429693 | 0.8891711 | 3.964602  | 1.9900236 | 0.0934257 | 0.6209341 |
| Q6A070 | Fam179b  | -0.373122 | 0.2803972 | 0.2031666 | 0.8743196 | -0.353521 | 0.1444051 | 0.0293162 | 0.6209341 |
| Q9D3R5 | Fam187a  | -0.415528 | 0.5942333 | 0.5069476 | 0.8753373 | -0.713784 | 0.5039943 | 0.2064611 | 0.6429844 |
| Q6GQV1 | Fam196b  | 0.4977216 | 0.7983252 | 0.5527485 | 0.8753373 | -1.193898 | 1.8565665 | 0.5439581 | 0.6979269 |
| Q8K2D0 | Fam199x  | -0.432939 | 0.7584452 | 0.5859688 | 0.8753373 | -0.306233 | 0.3935924 | 0.466106  | 0.6736081 |
| Q8C6C7 | Fam204a  | 1.0697805 | 1.2707068 | 0.4276781 | 0.8743196 | -0.717069 | 1.782149  | 0.7013602 | 0.7266885 |
| Q69ZR9 | Fam208a  | 0.0147643 | 0.2333242 | 0.951314  | 0.9060514 | -0.075985 | 0.1792967 | 0.6864899 | 0.7242619 |
| Q5DTT3 | Fam208b  | -0.228385 | 0.4781254 | 0.6474417 | 0.8896469 | 0.1353593 | 0.5329212 | 0.8079796 | 0.745845  |
| Q5MJS3 | Fam20c   | 0.4065308 | 0.7277706 | 0.5938462 | 0.876962  | -1.943536 | 1.6773774 | 0.2906166 | 0.652142  |
| Q6PGL7 | Fam21    | -0.044513 | 0.4729865 | 0.9262667 | 0.9048359 | -0.001191 | 0.4899304 | 0.998097  | 0.7800658 |
| Q3V0C3 | Fam22    | -0.824249 | 1.7599507 | 0.6537772 | 0.8900083 | 1.2655272 | 1.0922051 | 0.2906111 | 0.652142  |
| Q8R100 | Fam26e   | -0.571695 | 0.9520056 | 0.5670883 | 0.8753373 | -0.183507 | 1.2059756 | 0.8840447 | 0.7586148 |
| Q9D309 | Fam3b    | -1.09337  | 1.1317191 | 0.3661706 | 0.8743196 | -1.958484 | 1.2615229 | 0.171536  | 0.6323131 |
| P97805 | Fam3d    | -1.575043 | 1.6823532 | 0.3803287 | 0.8743196 | -1.373477 | 1.0405274 | 0.2349636 | 0.6442378 |
| Q921M7 | Fam49b   | 0.8241044 | 0.7599115 | 0.2893919 | 0.8743196 | 1.5291373 | 0.8913461 | 0.1016993 | 0.6209341 |
| Q76LS9 | Fam63a   | -0.848541 | 1.7294479 | 0.6386845 | 0.8883187 | 0.2111308 | 0.3889569 | 0.6068181 | 0.7082928 |
| Q6PDI6 | Fam63b   | -0.590855 | 0.483082  | 0.260868  | 0.8743196 | -0.835851 | 0.5837451 | 0.2021451 | 0.6429844 |
| A1L3T7 | Fam65c   | -0.501093 | 1.0064838 | 0.633837  | 0.8878094 | -7.421901 | 3.7170235 | 0.0928458 | 0.6209341 |
| Q9D6I7 | Fam69a   | -0.211561 | 1.5482087 | 0.8951556 | 0.9011581 | 1.3535671 | 0.6986529 | 0.1008052 | 0.6209341 |
| Q4QQM5 | Fam73a   | -0.953255 | 0.9674065 | 0.3572675 | 0.8743196 | -1.117394 | 0.5459821 | 0.0866518 | 0.6209341 |
| Q9DCV4 | Fam82b   | 0.3578825 | 0.3574209 | 0.3271046 | 0.8743196 | 0.0601351 | 0.3449374 | 0.8633539 | 0.7566266 |
| Q0VBM2 | Fam83b   | -0.293871 | 0.4389091 | 0.5133201 | 0.8753373 | 0.0507895 | 0.4310808 | 0.908012  | 0.7612577 |
| Q9D7I8 | Fam83d   | -0.824437 | 0.9798002 | 0.413319  | 0.8743196 | -0.158865 | 0.444279  | 0.7263963 | 0.7316805 |
| Q3UVG3 | Fam91a1  | 0.1040187 | 0.9611075 | 0.9168518 | 0.9048359 | -1.485688 | 1.5668533 | 0.3796374 | 0.6601864 |
| Q9JL70 | Fanca    | 0.2768005 | 0.8661068 | 0.7586048 | 0.8923639 | -0.981431 | 1.5792081 | 0.5571491 | 0.6980496 |
| E9Q5Z5 | Fancf    | 0.0207129 | 0.5174586 | 0.9691885 | 0.9072902 | 0.7708583 | 0.4405235 | 0.1307144 | 0.6209341 |
| Q8K368 | Fanci    | 0.2637884 | 1.2265064 | 0.8358422 | 0.8943678 | 0.0708899 | 1.3266617 | 0.9591202 | 0.7725471 |
| Q91VS8 | Farp2    | -0.910251 | 0.6518931 | 0.2052992 | 0.8743196 | 0.1719614 | 0.845201  | 0.8455033 | 0.753234  |
| Q8C0C7 | Farsa    | 0.4527338 | 0.4376578 | 0.3116821 | 0.8743196 | -0.174155 | 0.6242646 | 0.7831269 | 0.7436402 |
| Q9WUA2 | Farsb    | -0.35758  | 0.4955615 | 0.4759695 | 0.8743196 | -0.194532 | 0.5234318 | 0.7130568 | 0.7303836 |
| P19096 | Fasn     | -0.03997  | 0.100921  | 0.6921688 | 0.8900083 | -0.030875 | 0.1118612 | 0.7826175 | 0.7436402 |
| Q2PZL6 | Fat4     | -0.396282 | 0.9303677 | 0.6761992 | 0.8900083 | -0.308149 | 1.1339445 | 0.7900821 | 0.7439428 |
| P62862 | Fau      | -0.285683 | 0.980528  | 0.7792233 | 0.8940257 | -0.748351 | 1.4538077 | 0.6251316 | 0.7113805 |
| Q71FD7 | Fblim1   | 0.327508  | 0.4238821 | 0.4517393 | 0.8743196 | 0.1874064 | 0.3614519 | 0.6128334 | 0.7082928 |
| P37889 | Fbln2    | -1.186994 | 0.9153981 | 0.2358407 | 0.8743196 | -0.877736 | 1.3146777 | 0.5291894 | 0.6933955 |
| Q61554 | Fbn1     | -0.364324 | 0.2704357 | 0.1811282 | 0.8743196 | -0.259921 | 0.3269955 | 0.4289524 | 0.6694352 |
| Q61555 | Fbn2     | -0.317931 | 1.120667  | 0.7848493 | 0.8943678 | 0.7906537 | 0.7613851 | 0.3390904 | 0.6594641 |
| Q9QXD6 | Fbp1     | 0.2579409 | 0.2097571 | 0.2208242 | 0.8743196 | 0.1048007 | 0.2145625 | 0.6260945 | 0.7115945 |
| P70695 | Fbp2     | -0.403322 | 0.3040995 | 0.1911555 | 0.8743196 | -0.308635 | 0.2277332 | 0.1827579 | 0.6395902 |
| Q8BFZ4 | Fbxi121  | 1.3173282 | 0.4137365 | 0.0154051 | 0.8743196 | -1.502123 | 1.1034268 | 0.2223139 | 0.6442378 |
| Q9QXW0 | Fbxi6    | 1.314018  | 0.7439479 | 0.1206909 | 0.8743196 | 0.7796712 | 1.1750324 | 0.5316424 | 0.6939525 |
| Q9QZM9 | Fbxo16   | -0.393768 | 1.2377211 | 0.7596603 | 0.8923639 | 0.533007  | 1.0414658 | 0.6270857 | 0.7115945 |

|        |        |           |           |           |           |           |           |           |           |
|--------|--------|-----------|-----------|-----------|-----------|-----------|-----------|-----------|-----------|
| Q78JE5 | Fbxo22 | 1.7247249 | 1.4274198 | 0.2661689 | 0.8743196 | 1.513595  | 1.6266181 | 0.3880107 | 0.6611124 |
| Q8BMI0 | Fbxo38 | 0.934167  | 1.2181463 | 0.4682254 | 0.8743196 | 1.3360849 | 1.3126075 | 0.3480067 | 0.6594641 |
| P62932 | Fbxo40 | 0.6052403 | 1.0293081 | 0.574999  | 0.8753373 | 1.0324615 | 1.5609393 | 0.5328953 | 0.6951057 |
| Q6NS60 | Fbxo41 | -0.009918 | 0.2271447 | 0.9663927 | 0.9067656 | -0.225337 | 0.2229923 | 0.3512498 | 0.6594641 |
| Q6PDJ6 | Fbxo42 | -0.669374 | 0.4394482 | 0.1485072 | 0.8743196 | -0.331402 | 0.2455422 | 0.2001557 | 0.6429844 |
| Q8BI57 | Fbxw13 | -1.653046 | 2.3709405 | 0.5081575 | 0.8753373 | -1.086501 | 0.8421397 | 0.2444815 | 0.6500471 |
| Q2TB54 | Fcamr  | 1.2256636 | 0.478667  | 0.03752   | 0.8743196 | 1.0368504 | 0.4728923 | 0.0708233 | 0.6209341 |
| Q9CTH6 | Fcf1   | -1.11174  | 1.0066646 | 0.3059381 | 0.8743196 | -0.066222 | 0.4135164 | 0.8780228 | 0.7585027 |
| Q6PFY1 | Fchsd1 | -0.474445 | 0.4853995 | 0.3438565 | 0.8743196 | 0.3401559 | 0.5088221 | 0.5154996 | 0.6908335 |
| O70497 | Fcn2   | 1.8127016 | 0.9818134 | 0.1073516 | 0.8743196 | 0.8525609 | 1.2420014 | 0.518069  | 0.6910975 |
| Q5DRQ8 | Fcrlb  | 0.5266907 | 0.167043  | 0.016084  | 0.8743196 | 0.1525194 | 0.2031464 | 0.4811784 | 0.6794597 |
| Q920E5 | Fdps   | 0.0484673 | 0.2832015 | 0.8645507 | 0.8974757 | -0.350047 | 0.2993811 | 0.2463326 | 0.6500471 |
| P46656 | Fdx1   | -0.053547 | 0.3043908 | 0.8611164 | 0.897347  | -0.456384 | 0.3642175 | 0.2172858 | 0.6434585 |
| Q61578 | Fdxr   | -0.360542 | 0.5062529 | 0.4816804 | 0.8743196 | 0.1958189 | 0.4476961 | 0.6653056 | 0.7215904 |
| P22315 | Fech   | 0.2858027 | 0.2700772 | 0.2964632 | 0.8743196 | -0.46427  | 0.433076  | 0.2912581 | 0.6529586 |
| A3KGK3 | Fer114 | -0.476072 | 0.8878863 | 0.6084391 | 0.8792876 | -1.527425 | 0.860787  | 0.1263432 | 0.6209341 |
| P59113 | Fermt1 | 0.8314194 | 1.0253634 | 0.4441402 | 0.8743196 | 0.4948592 | 1.0241198 | 0.6460768 | 0.7175625 |
| Q8CIB5 | Fermt2 | 0.0170734 | 0.512079  | 0.9736901 | 0.9072902 | 0.3056475 | 0.4728847 | 0.525403  | 0.69337   |
| Q8K1B8 | Fermt3 | 0.0434669 | 0.6814469 | 0.509237  | 0.9060514 | -0.01708  | 0.4562586 | 0.971353  | 0.7751875 |
| P16879 | Fes    | 0.8001982 | 0.6043644 | 0.2270882 | 0.8743196 | 0.7977193 | 0.7710242 | 0.3407326 | 0.6594641 |
| Q9QXC1 | Fetub  | 0.1631416 | 0.4234415 | 0.7026643 | 0.8907355 | 0.0131185 | 0.484195  | 0.9785845 | 0.7762206 |
| Q8QZW2 | Fev    | -0.522932 | 1.5356955 | 0.7434572 | 0.8923639 | -0.384951 | 1.9043315 | 0.8464831 | 0.7534216 |
| Q0VDQ9 | Fezf1  | -1.30107  | 0.5031594 | 0.0361653 | 0.8743196 | -0.013903 | 0.2784562 | 0.9617999 | 0.7730074 |
| Q8K0E8 | Fgb    | -0.070767 | 0.1967583 | 0.7196019 | 0.8910745 | -0.367583 | 0.2181699 | 0.0943806 | 0.6209341 |
| P52734 | Fgd1   | 0.8071203 | 1.0043071 | 0.4480204 | 0.8743196 | 0.5002941 | 1.2002865 | 0.6913168 | 0.7248672 |
| Q80UZ0 | Fgd5   | -1.394325 | 1.2207826 | 0.2712938 | 0.8743196 | 0.1718563 | 0.557897  | 0.7629297 | 0.7390065 |
| P61148 | Fgf1   | -0.794114 | 0.4562458 | 0.0951286 | 0.8743196 | -0.626123 | 0.6366193 | 0.3371042 | 0.6594641 |
| Q0VG15 | Fgf3   | -0.286123 | 0.4935233 | 0.5802512 | 0.8753373 | -0.168203 | 0.554685  | 0.7719456 | 0.7423579 |
| P16092 | Fgfr1  | -0.164981 | 0.66205   | 0.8103623 | 0.8943678 | -4.566485 | 2.8105566 | 0.1553389 | 0.6211692 |
| Q8VCM7 | Fgg    | 0.1343581 | 0.2217628 | 0.5458419 | 0.8753373 | 0.0255034 | 0.2233647 | 0.9093326 | 0.7615898 |
| A2AJL3 | Fggy   | -0.047579 | 0.3427034 | 0.8900243 | 0.9006736 | 0.1653836 | 0.3308273 | 0.6191332 | 0.7091807 |
| P14234 | Fgr    | 0.4458126 | 1.1364153 | 0.7065093 | 0.8910745 | 0.2279876 | 1.1994916 | 0.8555216 | 0.7553078 |
| P97807 | Fh     | -0.194657 | 0.1592196 | 0.2226974 | 0.8743196 | -0.27289  | 0.1922234 | 0.1571998 | 0.6211692 |
| P97447 | Fhl1   | -0.03116  | 0.4158021 | 0.9405808 | 0.9048359 | -0.580532 | 0.4607188 | 0.2147736 | 0.6429844 |
| O70433 | Fhl2   | 0.2199077 | 0.2665915 | 0.4157387 | 0.8743196 | 0.1495399 | 0.2172036 | 0.4970251 | 0.6823283 |
| A2AV25 | Fibcd1 | 2.4734152 | 1.3762165 | 0.1153465 | 0.8743196 | 1.3301465 | 1.4905408 | 0.4065471 | 0.6650297 |
| Q9JI19 | Fibp   | -0.967985 | 0.9977735 | 0.3642931 | 0.8743196 | -0.391355 | 0.4313709 | 0.3992511 | 0.6626324 |
| Q8BIX9 | Ficd   | -0.558866 | 0.9021993 | 0.5552386 | 0.8753373 | -0.118101 | 0.3905755 | 0.7725733 | 0.7426133 |
| Q91WF7 | Fig4   | 0.789605  | 0.5402708 | 0.1574076 | 0.8743196 | 0.0773991 | 0.7233804 | 0.9158578 | 0.7627031 |
| Q9CQ92 | Fis1   | 0.9289995 | 0.850669  | 0.3109522 | 0.8743196 | 0.9297092 | 0.9427681 | 0.3621424 | 0.6594641 |
| Q6P9Q6 | Fkbp15 | -0.14925  | 0.6300242 | 0.815943  | 0.8943678 | 0.3279844 | 0.8052751 | 0.6904185 | 0.724834  |
| P26883 | Fkbp1a | 0.429042  | 0.593641  | 0.4809637 | 0.8743196 | -0.546336 | 0.8791033 | 0.5450347 | 0.6979269 |
| P45878 | Fkbp2  | -0.23632  | 0.4025576 | 0.5614238 | 0.8753373 | -0.174575 | 0.4169722 | 0.6787668 | 0.7239064 |
| P30416 | Fkbp4  | -0.490433 | 0.1916755 | 0.0117618 | 0.8743196 | -0.393187 | 0.1985403 | 0.0503009 | 0.6209341 |
| O54998 | Fkbp7  | -0.878803 | 0.8850538 | 0.3538159 | 0.8743196 | -0.251767 | 0.127906  | 0.0965678 | 0.6209341 |
| Q8R123 | Flad1  | -0.274542 | 0.6874487 | 0.6918039 | 0.8900083 | -0.243164 | 0.8067473 | 0.7649352 | 0.7395427 |
| Q8BTM8 | Flna   | -0.64956  | 0.4823044 | 0.1878139 | 0.8743196 | -0.972032 | 0.5586368 | 0.0932464 | 0.6209341 |
| Q80X90 | Flnb   | 0.2035783 | 0.4213062 | 0.6316501 | 0.8857775 | -0.436525 | 0.4192683 | 0.3051488 | 0.6553142 |
| Q8VHX6 | Flnc   | 0.1989901 | 0.2298251 | 0.3883241 | 0.8743196 | 0.2959047 | 0.2466847 | 0.233049  | 0.6442378 |
| P35969 | Flt1   | -0.166698 | 0.6159815 | 0.7903701 | 0.8943678 | -0.080136 | 0.4366363 | 0.8572128 | 0.7556239 |
| Q00342 | Flt3   | -0.160963 | 0.8351058 | 0.8526313 | 0.8962775 | -0.896819 | 1.1739509 | 0.473868  | 0.6774295 |
| Q3UEW6 | Flt3   | 0.0701272 | 0.8326218 | 0.935236  | 0.9048359 | 0.253389  | 0.7596932 | 0.7500736 | 0.7375672 |
| P35917 | Flt4   | 0.2033738 | 0.9604469 | 0.838336  | 0.8947711 | -0.282085 | 0.9673392 | 0.780405  | 0.7434254 |
| Q05860 | Fmn1   | -0.642093 | 0.5271467 | 0.2355515 | 0.8743196 | -0.578197 | 0.3906874 | 0.154468  | 0.6211692 |
| Q9JL26 | Fmn1l  | 0.2074432 | 0.8934272 | 0.823034  | 0.8943678 | -0.865076 | 1.0699902 | 0.4496688 | 0.6701719 |
| P50285 | Fmo1   | 0.072915  | 0.2266707 | 0.7487613 | 0.8923639 | -0.368994 | 0.2976993 | 0.2204286 | 0.6434585 |
| P97872 | Fmo5   | -0.464049 | 0.2606258 | 0.077002  | 0.8743196 | 0.2235057 | 0.2119721 | 0.293621  | 0.6532982 |
| P50608 | Fmod   | -0.716628 | 0.584382  | 0.2597322 | 0.8743196 | 0.4912993 | 0.4236719 | 0.2902594 | 0.652142  |
| Q80ZA7 | Fmr1nb | 1.7726904 | 1.1907019 | 0.1801531 | 0.8743196 | 2.4222863 | 1.2127234 | 0.0927607 | 0.6209341 |
| P11276 | Fn1    | 0.166532  | 0.8846865 | 0.8532127 | 0.8962775 | 0.906726  | 0.7973836 | 0.2760115 | 0.6500471 |
| Q8K274 | Fn3krp | 1.7750667 | 1.0276696 | 0.1277565 | 0.8743196 | 1.3799221 | 1.1445854 | 0.2733514 | 0.6500471 |

|        |            |           |           |           |           |           |           |           |           |
|--------|------------|-----------|-----------|-----------|-----------|-----------|-----------|-----------|-----------|
| Q8BX90 | Fndc3a     | -0.177073 | 0.7832413 | 0.8241934 | 0.8943678 | -0.220689 | 1.0461851 | 0.8361999 | 0.7519044 |
| Q6NWW9 | Fndc3b     | -1.742245 | 0.7417301 | 0.0511707 | 0.8743196 | -0.676945 | 1.3723935 | 0.6393618 | 0.7151423 |
| A2AED3 | Fndc7      | -0.381642 | 1.3449507 | 0.7848043 | 0.8943678 | 0.459234  | 0.639398  | 0.4996153 | 0.6823283 |
| Q68FD7 | Fnip1      | -0.343196 | 0.7422776 | 0.6578537 | 0.8900083 | -0.231335 | 0.4367007 | 0.6153162 | 0.7084882 |
| Q61239 | Fnta       | 0.5475228 | 0.6153435 | 0.4031237 | 0.8743196 | -2.528968 | 1.6852971 | 0.1841285 | 0.6405321 |
| A2AKG8 | Focad      | 0.6697038 | 0.5712796 | 0.2794287 | 0.8743196 | -1.369928 | 1.150788  | 0.2788376 | 0.6503929 |
| Q61660 | Foxj1      | 0.1440094 | 0.5340174 | 0.7910873 | 0.8943678 | 0.0803661 | 0.4203789 | 0.8513417 | 0.7537615 |
| Q8K3Q3 | Foxn4      | 0.8813185 | 1.3974099 | 0.5482791 | 0.8753373 | 1.2847786 | 1.1360893 | 0.301274  | 0.6540599 |
| Q9WVH4 | Foxo3      | -0.294302 | 1.2009988 | 0.8134484 | 0.8943678 | -1.282049 | 1.5534832 | 0.4407866 | 0.6699704 |
| P58462 | Foxp1      | 0.411481  | 1.320802  | 0.7644647 | 0.8923639 | 0.269776  | 1.1134068 | 0.816619  | 0.7474231 |
| Q3UM89 | Foxr2      | 0.9840799 | 0.4577458 | 0.0686299 | 0.8743196 | 0.5914437 | 0.4632732 | 0.2489041 | 0.6500471 |
| O88536 | Fpr2       | 0.3669123 | 0.4032224 | 0.3931019 | 0.8743196 | -0.543823 | 0.325109  | 0.1454071 | 0.6209341 |
| Q80T14 | Fras1      | -0.306377 | 0.3886232 | 0.4427653 | 0.8743196 | 0.0788493 | 0.3500652 | 0.8252933 | 0.749518  |
| Q6NVD0 | Frem2      | 0.0750289 | 0.5441045 | 0.892158  | 0.9006736 | 0.0328713 | 0.4220824 | 0.9391104 | 0.7681455 |
| P97376 | Frg1       | 0.9465171 | 1.6108904 | 0.575274  | 0.8753373 | 2.0846146 | 1.1304089 | 0.1147205 | 0.6209341 |
| Q8BHD4 | Frmd3      | -1.316579 | 1.5162953 | 0.4140121 | 0.8743196 | -1.55715  | 1.4444398 | 0.3224414 | 0.6594641 |
| Q8BIE6 | Frmd4a     | -0.306459 | 0.390048  | 0.4578105 | 0.8743196 | -0.41619  | 0.2136156 | 0.0992906 | 0.6209341 |
| Q920B0 | Frmd4b     | 1.4456915 | 0.7003226 | 0.0504433 | 0.8743196 | 1.031615  | 0.7647698 | 0.1924378 | 0.6418859 |
| Q8C0V9 | Frmd6      | 0.0754339 | 0.7750231 | 0.9251916 | 0.9048359 | -0.400888 | 1.2168575 | 0.753016  | 0.7375672 |
| A2AKB4 | Frmpd1     | -0.032742 | 0.920649  | 0.9726228 | 0.9072902 | -0.433311 | 1.1885033 | 0.7279257 | 0.7323934 |
| A2AFR3 | Frmpd4     | 0.3269123 | 0.5559648 | 0.5749976 | 0.8753373 | -0.858112 | 0.4640523 | 0.1139211 | 0.6209341 |
| E9Q8I9 | Fry        | -2.275402 | 3.1214471 | 0.4896925 | 0.8743196 | -0.234168 | 0.5117063 | 0.6633277 | 0.7215904 |
| A1EGX6 | Fscb       | 4.7709004 | 4.7938477 | 0.3527824 | 0.8743196 | 6.4196454 | 4.6899704 | 0.2200926 | 0.6434585 |
| Q61553 | Fscn1      | -0.926501 | 1.0046989 | 0.3871209 | 0.8743196 | 0.2118492 | 0.4102873 | 0.6240852 | 0.7111404 |
| Q7TPM6 | Fsd1       | 0.3024198 | 0.5169594 | 0.5672461 | 0.8753373 | -0.315298 | 0.5621039 | 0.584388  | 0.7048643 |
| P47931 | Fst        | 0.0906467 | 0.6447339 | 0.8921498 | 0.9006736 | 0.1327322 | 1.0489235 | 0.9034375 | 0.7610813 |
| Q91XD4 | Ftcd       | 0.0487221 | 0.2367256 | 0.8371444 | 0.8943678 | 0.1581296 | 0.2430985 | 0.5162432 | 0.6910282 |
| P09528 | Fth1       | -0.211814 | 0.4687651 | 0.6556048 | 0.8900083 | 0.3076119 | 0.4754036 | 0.5249545 | 0.69337   |
| Q9DBC3 | Ftsjd2     | -0.844634 | 1.05948   | 0.4515153 | 0.8743196 | 0.2406632 | 0.2330837 | 0.3416405 | 0.6594641 |
| Q8R2K1 | Fuom       | -0.067806 | 0.191283  | 0.7334196 | 0.8923639 | -0.233191 | 0.2015836 | 0.2913276 | 0.6529586 |
| P56959 | Fus        | -0.346266 | 0.2654327 | 0.2333015 | 0.8743196 | -0.061095 | 0.1604001 | 0.716407  | 0.7303836 |
| O09160 | Fut1       | 0.5256632 | 0.7751476 | 0.5194595 | 0.8753373 | 0.5588809 | 0.9517553 | 0.5784735 | 0.7021424 |
| Q5F2L2 | Fut10      | -0.030825 | 0.6616731 | 0.9641444 | 0.9067461 | -0.493697 | 0.6763758 | 0.4929432 | 0.6814973 |
| Q3UYI6 | Fuz        | -0.064757 | 0.8795158 | 0.9433659 | 0.9054086 | 0.2182057 | 0.8458655 | 0.8050523 | 0.7454614 |
| O35943 | Fxn        | 0.1164828 | 0.4949453 | 0.816024  | 0.8943678 | -0.284924 | 0.6795398 | 0.6794738 | 0.7239064 |
| Q61584 | Fxr1       | -1.287501 | 1.2621569 | 0.3416444 | 0.8743196 | -1.015095 | 0.3945603 | 0.0421801 | 0.6209341 |
| Q9Z239 | Fxyd1      | 0.2141249 | 0.1673365 | 0.2414601 | 0.8743196 | -0.06051  | 0.1897616 | 0.7606309 | 0.7380771 |
| Q8VDC1 | Fyco1      | 0.2094353 | 0.4549841 | 0.6592488 | 0.8900083 | -1.213529 | 0.3676125 | 0.0163852 | 0.6209341 |
| Q9JIP6 | Fzd2       | 0.5879724 | 0.6726928 | 0.4110683 | 0.8743196 | -0.002021 | 0.4803848 | 0.9967795 | 0.7796648 |
| Q61086 | Fzd3       | -1.191343 | 0.3964743 | 0.019806  | 0.8743196 | -0.845748 | 1.0627634 | 0.4564688 | 0.6712964 |
| Q5RJY2 | G2e3       | -0.598357 | 0.5976833 | 0.3501081 | 0.8743196 | -0.192424 | 0.2865352 | 0.5268638 | 0.69337   |
| P97855 | G3bp1      | 0.6330051 | 0.3576711 | 0.120072  | 0.8743196 | 0.440267  | 0.3662655 | 0.2746313 | 0.6500471 |
| P97379 | G3bp2      | 0.9215937 | 0.5891775 | 0.1314257 | 0.8743196 | 0.897852  | 0.6761515 | 0.1991727 | 0.6429844 |
| Q3TMT8 | G630025P09 | 0.2687903 | 0.4277686 | 0.5497157 | 0.8753373 | -1.329578 | 0.5193418 | 0.0429017 | 0.6209341 |
| P35576 | G6pc       | -0.271234 | 0.376192  | 0.4942793 | 0.8748057 | -0.29479  | 0.3384319 | 0.417214  | 0.6692583 |
| Q9Z186 | G6pc2      | 0.6058713 | 0.5988125 | 0.3453275 | 0.8743196 | -1.228613 | 1.664975  | 0.4884097 | 0.6803412 |
| A0FF38 | G6pd2      | 0.3111742 | 0.7918952 | 0.7060495 | 0.8910745 | -0.809807 | 1.0258071 | 0.4599081 | 0.6712964 |
| P70699 | Gaa        | -0.227014 | 0.3726811 | 0.5453661 | 0.8753373 | -0.239601 | 0.4166434 | 0.5683834 | 0.6997388 |
| Q9QYY0 | Gab1       | 1.3842452 | 0.9530016 | 0.1669568 | 0.8743196 | 1.5777861 | 0.9995817 | 0.1384777 | 0.6209341 |
| Q9WV18 | Gabbr1     | 0.2104716 | 0.61487   | 0.7368723 | 0.8923639 | 0.0967002 | 0.5819781 | 0.8705892 | 0.7571111 |
| P26049 | Gabra3     | -0.999236 | 1.7438788 | 0.5845754 | 0.8753373 | 0.6909598 | 1.3041444 | 0.6152611 | 0.7084882 |
| Q9CR59 | Gadd45gip1 | -0.999012 | 0.9411841 | 0.3052809 | 0.8743196 | 0.2367685 | 0.2157103 | 0.2922841 | 0.6532982 |
| Q99KY4 | Gak        | -0.237196 | 0.9967105 | 0.8187134 | 0.8943678 | -0.472936 | 1.3210504 | 0.7326008 | 0.7326734 |
| Q8R059 | Gale       | 1.6188724 | 1.193751  | 0.2171763 | 0.8743196 | 0.5977313 | 1.3232612 | 0.6673465 | 0.7215904 |
| Q9R0N0 | Galk1      | -0.440099 | 0.3135409 | 0.1643446 | 0.8743196 | -0.092628 | 0.2808153 | 0.7425085 | 0.7349268 |
| Q8K157 | Galm       | 0.1217477 | 0.3568944 | 0.7341402 | 0.8923639 | -0.089246 | 0.3414207 | 0.7947636 | 0.7439428 |
| Q571E4 | Galns      | 0.3431433 | 0.5852051 | 0.5760426 | 0.8753373 | -0.964905 | 0.5667173 | 0.1395336 | 0.6209341 |
| Q8BVG5 | Galnt14    | 0.7498856 | 1.451525  | 0.6213379 | 0.8826986 | 0.4386574 | 1.5921496 | 0.792165  | 0.7439428 |
| P56479 | Galr1      | 2.318908  | 2.2481282 | 0.3366295 | 0.8743196 | 1.1443242 | 2.6379241 | 0.6795992 | 0.7239064 |
| O88853 | Galr3      | 1.4946969 | 1.0847988 | 0.2106812 | 0.8743196 | 1.0102558 | 1.2094443 | 0.4355385 | 0.6699704 |
| Q03249 | Galt       | -0.51116  | 0.5242663 | 0.3620417 | 0.8743196 | 0.4039699 | 0.3090097 | 0.2389693 | 0.6460374 |

|        |        |           |           |           |           |           |           |           |           |
|--------|--------|-----------|-----------|-----------|-----------|-----------|-----------|-----------|-----------|
| O35969 | Gamt   | -0.062071 | 0.4403984 | 0.8884295 | 0.9006736 | 0.3493524 | 0.4087883 | 0.3970154 | 0.6617584 |
| Q8BHN3 | Ganab  | 0.1796899 | 0.2962312 | 0.5458644 | 0.8753373 | -0.606154 | 0.401981  | 0.1361411 | 0.6209341 |
| P06837 | Gap43  | -0.137839 | 0.585291  | 0.8205578 | 0.8943678 | -2.033904 | 0.911028  | 0.0670315 | 0.6209341 |
| P16858 | Gapdh  | 0.054103  | 0.2375323 | 0.8200255 | 0.8943678 | 0.1384418 | 0.2464549 | 0.5749208 | 0.7015295 |
| Q9CY66 | Gar1   | 0.6230117 | 0.7786637 | 0.4499464 | 0.8743196 | -1.735494 | 1.0067634 | 0.1355045 | 0.6209341 |
| Q9CZD3 | Gars   | 0.4121316 | 0.4121783 | 0.3251067 | 0.8743196 | -0.18468  | 0.4925523 | 0.7106299 | 0.7288708 |
| Q64737 | Gart   | -0.06967  | 0.3845887 | 0.8569113 | 0.897347  | -0.102912 | 0.2986922 | 0.7319432 | 0.7326734 |
| Q5SSG4 | Gas2l2 | 0.8320214 | 0.9855923 | 0.4264721 | 0.8743196 | 0.6782771 | 1.1126027 | 0.5644633 | 0.6997388 |
| Q60780 | Gas7   | -0.273346 | 1.1846964 | 0.8241221 | 0.8943678 | 0.4454166 | 0.9245981 | 0.6470574 | 0.7177722 |
| Q9D964 | Gatm   | -0.432775 | 0.9619056 | 0.6663743 | 0.8900083 | 0.5670562 | 0.6720693 | 0.4311584 | 0.6694352 |
| P17439 | Gba    | 0.3057374 | 0.8033029 | 0.7147863 | 0.8910745 | 0.7910605 | 0.3812652 | 0.0833287 | 0.6209341 |
| Q69ZF3 | Gba2   | 1.2621915 | 0.5026704 | 0.0403395 | 0.8743196 | 1.0344644 | 0.6242489 | 0.1485684 | 0.6209341 |
| O55126 | Gbas   | 0.5387399 | 0.3015508 | 0.0771978 | 0.8743196 | 0.5083468 | 0.3053456 | 0.0997186 | 0.6209341 |
| Q9D6Y9 | Gbe1   | -0.025773 | 0.2182914 | 0.9061635 | 0.9048359 | 0.2008578 | 0.2055806 | 0.3302531 | 0.6594641 |
| Q9Z0E6 | Gbp2   | -0.680199 | 0.7947452 | 0.4203973 | 0.8743196 | -0.576179 | 1.1286323 | 0.6279261 | 0.7115945 |
| Q61107 | Gbp4   | 1.0408917 | 1.0416232 | 0.3334991 | 0.8743196 | 1.2830422 | 1.2659198 | 0.3293021 | 0.6594641 |
| P21614 | Gc     | 0.1169496 | 0.2608519 | 0.6546286 | 0.8900083 | 0.5584306 | 0.2400055 | 0.0216847 | 0.6209341 |
| O88986 | Gcat   | -0.375487 | 0.2363819 | 0.1152435 | 0.8743196 | -0.596193 | 0.2795003 | 0.0356408 | 0.6209341 |
| Q60759 | Gcdh   | -0.248508 | 0.2263623 | 0.2738572 | 0.8743196 | 0.2567256 | 0.2133195 | 0.2307385 | 0.6442378 |
| Q05915 | Gch1   | -0.38419  | 0.6679189 | 0.5831609 | 0.8753373 | -0.379215 | 0.51862   | 0.4922135 | 0.6814973 |
| P99025 | Gchfr  | 0.386564  | 0.3273162 | 0.2447508 | 0.8743196 | -0.114874 | 0.4042314 | 0.7779974 | 0.7428116 |
| P52792 | Gck    | 0.0402431 | 0.5201433 | 0.9386106 | 0.9048359 | 0.3949869 | 0.5234671 | 0.4541997 | 0.6712964 |
| Q91X44 | Gckr   | -0.013243 | 0.3729138 | 0.9717309 | 0.9072902 | -0.47574  | 0.4135372 | 0.2526105 | 0.6500471 |
| P97494 | Gclc   | 0.029303  | 0.2463391 | 0.9054787 | 0.9048359 | 0.1433615 | 0.2382807 | 0.5484968 | 0.6980496 |
| O09172 | Gclm   | 0.1750604 | 0.3407293 | 0.6094629 | 0.8792876 | 0.1126174 | 0.3684407 | 0.7611856 | 0.7380771 |
| Q91WK5 | Gcsh   | 0.4688233 | 0.9901654 | 0.6426882 | 0.8891711 | 2.1588425 | 0.8957309 | 0.0314812 | 0.6209341 |
| Q9R111 | Gda    | -1.21667  | 0.9451902 | 0.2389418 | 0.8743196 | -0.704044 | 0.8317024 | 0.4297319 | 0.6694352 |
| P97737 | Gdf10  | -0.47757  | 0.56483   | 0.4111109 | 0.8743196 | -0.192528 | 0.1927318 | 0.336054  | 0.6594641 |
| P50396 | Gdi1   | 0.3444229 | 0.3591109 | 0.3407636 | 0.8743196 | 0.292206  | 0.4227943 | 0.4920632 | 0.6814973 |
| Q61598 | Gdi2   | -0.338656 | 0.201101  | 0.0938847 | 0.8743196 | 0.1574087 | 0.1719881 | 0.3614482 | 0.6594641 |
| Q99LY2 | Gdpd3  | -0.390817 | 0.1873847 | 0.0754544 | 0.8743196 | -0.12676  | 0.0858883 | 0.1904335 | 0.6405321 |
| Q8BML4 | Gen1   | 0.7542574 | 1.70518   | 0.6715926 | 0.8900083 | 3.0498571 | 0.9786373 | 0.0206786 | 0.6209341 |
| P56213 | Gfer   | -1.396657 | 4.651514  | 0.7727008 | 0.8930103 | 0.8544127 | 4.696659  | 0.8616366 | 0.7561118 |
| Q8K0D5 | Gfm1   | 0.6248566 | 0.444487  | 0.1637066 | 0.8743196 | 0.8479072 | 0.4339599 | 0.0547697 | 0.6209341 |
| Q9D7X8 | Ggct   | 1.0999956 | 0.8714909 | 0.2195262 | 0.8743196 | 0.4676928 | 1.0350846 | 0.6562461 | 0.7198872 |
| Q5SV77 | Ggnbp2 | 2.2814542 | 1.0464333 | 0.0656195 | 0.8743196 | 3.1152029 | 0.8135914 | 0.0086697 | 0.6209341 |
| Q99JP7 | Ggt7   | -0.120802 | 0.7757071 | 0.8783208 | 0.9006736 | -0.688675 | 0.7569897 | 0.3795106 | 0.6601864 |
| P16882 | Ghr    | 0.8612547 | 2.2707635 | 0.7097955 | 0.8910745 | -0.012564 | 2.5812906 | 0.9961903 | 0.7793849 |
| Q6Y7W8 | Gigyf2 | -0.059861 | 0.9213037 | 0.9500115 | 0.9060514 | 0.1742843 | 1.090224  | 0.8782365 | 0.7585027 |
| Q99JY3 | Gimap4 | -1.992864 | 1.4944124 | 0.2022512 | 0.8743196 | -3.341109 | 2.1284132 | 0.1404813 | 0.6209341 |
| Q8K349 | Gimap6 | -0.149672 | 0.2600538 | 0.5829446 | 0.8753373 | -0.187956 | 0.2796427 | 0.5265217 | 0.69337   |
| Q8K259 | Gin1   | -2.534442 | 1.2013459 | 0.072824  | 0.8743196 | -0.87169  | 0.6655478 | 0.2381973 | 0.6456045 |
| Q68FF6 | Git1   | -0.710086 | 0.8512367 | 0.4317208 | 0.8743196 | -0.629433 | 0.582481  | 0.3213816 | 0.6594641 |
| P28229 | Gjc1   | -0.728902 | 1.2837784 | 0.587925  | 0.8753373 | 0.9524525 | 1.0314824 | 0.3914292 | 0.661436  |
| Q8BQU6 | Gjc2   | 0.8588613 | 0.8229798 | 0.3313654 | 0.8743196 | 1.200686  | 0.9096811 | 0.2349898 | 0.6442378 |
| Q64516 | Gk     | -0.171588 | 0.4339933 | 0.6947239 | 0.8900083 | 0.250734  | 0.2916532 | 0.3959763 | 0.6617584 |
| P23780 | Glb1   | -0.425719 | 1.0338559 | 0.6928188 | 0.8900083 | -0.636897 | 1.2923681 | 0.639658  | 0.7151423 |
| E0CY86 | Glb1l2 | -0.734628 | 0.9669109 | 0.4722004 | 0.8743196 | 0.037233  | 0.2828312 | 0.8995693 | 0.7608777 |
| A2RSQ1 | Glb1l3 | 0.1652363 | 0.8545623 | 0.8521696 | 0.8962775 | -0.104688 | 1.1110798 | 0.9280009 | 0.764332  |
| Q91W43 | Gldc   | 0.1607269 | 0.2909253 | 0.5820444 | 0.8753373 | 0.0205868 | 0.2902083 | 0.9436335 | 0.7691222 |
| Q61543 | Glg1   | -1.94868  | 1.1110006 | 0.1228762 | 0.8743196 | 0.0157181 | 0.5769988 | 0.9791509 | 0.7762206 |
| Q9CPU0 | Glo1   | 0.0750207 | 0.4733834 | 0.8751083 | 0.9006736 | -0.435124 | 0.5590722 | 0.4431615 | 0.6699704 |
| Q9CPV4 | Glod4  | -0.22733  | 0.2659309 | 0.3943538 | 0.8743196 | -0.082172 | 0.2762213 | 0.7666885 | 0.7399809 |
| O35659 | Glp1r  | -0.558742 | 0.3399921 | 0.1443014 | 0.8743196 | -0.179404 | 0.5194995 | 0.7416234 | 0.7347883 |
| Q9QUH0 | GlrX   | 0.137643  | 1.2225807 | 0.9118532 | 0.9048359 | 0.9485485 | 0.989131  | 0.3550697 | 0.6594641 |
| Q9CQM9 | GlrX3  | 0.2083659 | 0.478612  | 0.6663213 | 0.8900083 | 0.3040339 | 0.4233566 | 0.478833  | 0.6788349 |
| Q80Y14 | GlrX5  | 1.0261627 | 0.8575163 | 0.2405078 | 0.8743196 | 1.6715939 | 0.9181003 | 0.0797523 | 0.6209341 |
| D3Z7P3 | Gls    | -0.889376 | 1.1223681 | 0.4541344 | 0.8743196 | -0.611973 | 0.3227814 | 0.1067697 | 0.6209341 |
| Q571F8 | Gls2   | -0.360073 | 0.2379194 | 0.1322627 | 0.8743196 | -0.018626 | 0.2425725 | 0.938911  | 0.7681455 |
| Q2NKH9 | Glt6d1 | -0.694304 | 0.813684  | 0.4217362 | 0.8743196 | -0.091159 | 1.1440439 | 0.9390819 | 0.7681455 |
| P26443 | Glud1  | 0.3771154 | 0.1762469 | 0.0333594 | 0.8743196 | 0.2264436 | 0.2035027 | 0.2670613 | 0.6500471 |

|         |         |           |           |           |           |           |           |           |           |
|---------|---------|-----------|-----------|-----------|-----------|-----------|-----------|-----------|-----------|
| P15105  | Glul    | 0.2713443 | 0.259861  | 0.2976152 | 0.8743196 | 0.21739   | 0.2706005 | 0.4228195 | 0.6694352 |
| Q91XE0  | Glyat   | -0.299589 | 0.2811393 | 0.2892945 | 0.8743196 | 0.0195235 | 0.2833892 | 0.9452405 | 0.7694372 |
| Q8QZY2  | Glyctk  | 0.5643186 | 0.3099874 | 0.0783562 | 0.8743196 | -0.434696 | 0.4399068 | 0.3318496 | 0.6594641 |
| Q8BR97  | Gm10000 | 0.0344978 | 0.2441761 | 0.8916267 | 0.9006736 | -0.083983 | 0.2072125 | 0.6993148 | 0.7266885 |
| Q8BQP5  | Gm10050 | 0.3244829 | 0.7243486 | 0.6677142 | 0.8900083 | -2.076488 | 1.0449182 | 0.0940771 | 0.6209341 |
| Q9CUK2  | Gm10306 | 0.5180089 | 1.2199429 | 0.6838619 | 0.8900083 | 1.7690465 | 0.792741  | 0.067122  | 0.6209341 |
| Q3V0T5  | Gm10382 | -0.043798 | 4.1256536 | 0.9918261 | 0.9095427 | 0.2497473 | 4.8189369 | 0.9603495 | 0.7730074 |
| Q3UYD6  | Gm10403 | 1.2554111 | 1.1331502 | 0.3045174 | 0.8743196 | 1.342714  | 1.277336  | 0.333657  | 0.6594641 |
| Q3TXX5  | Gm10497 | 0.752255  | 1.1655863 | 0.5392463 | 0.8753373 | 0.9891119 | 1.2989787 | 0.4752403 | 0.6774295 |
| Q3UHB9  | Gm10524 | -2.219907 | 1.7310616 | 0.240535  | 0.8743196 | -1.026646 | 0.4279249 | 0.0533584 | 0.6209341 |
| Q3UUC4  | Gm10556 | -0.216605 | 0.8558642 | 0.8074752 | 0.8943678 | 0.3428283 | 0.5467265 | 0.5537184 | 0.6980496 |
| Q3UUU31 | Gm10589 | -1.201147 | 0.8597113 | 0.2050596 | 0.8743196 | -0.785273 | 0.8854611 | 0.4092957 | 0.666531  |
| Q3UUX0  | Gm10641 | 0.0146891 | 0.7732009 | 0.9853731 | 0.9078335 | 0.5181536 | 0.5429836 | 0.3767942 | 0.6594641 |
| Q3UR34  | Gm10703 | -0.011809 | 0.4398313 | 0.9793299 | 0.9073888 | -1.262633 | 0.632597  | 0.0929463 | 0.6209341 |
| Q3USI9  | Gm10710 | -0.791892 | 0.4407638 | 0.1154514 | 0.8743196 | -1.597663 | 0.7443426 | 0.0754797 | 0.6209341 |
| Q3V0I0  | Gm10750 | 1.1495488 | 0.7120951 | 0.1504926 | 0.8743196 | 1.5599342 | 0.7042196 | 0.0686572 | 0.6209341 |
| Q3UP56  | Gm10804 | -1.267798 | 1.4044891 | 0.3966955 | 0.8743196 | 0.4789795 | 1.2992374 | 0.7250382 | 0.7309165 |
| Q0Q237  | Gm1110  | -0.02678  | 0.2003438 | 0.8974248 | 0.9017905 | -0.499977 | 0.241053  | 0.0834087 | 0.6209341 |
| Q9D3T0  | Gm11149 | 1.3642482 | 0.9183441 | 0.1809813 | 0.8743196 | 0.5331771 | 1.3594118 | 0.7084549 | 0.728514  |
| Q8BPS1  | Gm12474 | 0.0432375 | 0.9258449 | 0.9640563 | 0.9067461 | -0.57269  | 1.081997  | 0.6156061 | 0.7084882 |
| B1ARV6  | Gm13125 | 0.7334173 | 1.1098154 | 0.5298515 | 0.8753373 | 1.7384998 | 0.9977515 | 0.1320682 | 0.6209341 |
| Q3V037  | Gm136   | -0.515024 | 0.9457228 | 0.6029491 | 0.8792876 | -0.632642 | 1.5810671 | 0.7029133 | 0.7270995 |
| Q6R5E1  | Gm14164 | -0.589112 | 0.7988259 | 0.484816  | 0.8743196 | -2.534445 | 1.870087  | 0.2241318 | 0.6442378 |
| B1AQA5  | Gm14194 | -1.069291 | 1.0371011 | 0.3368242 | 0.8743196 | 0.2473273 | 1.1032458 | 0.830055  | 0.7517136 |
| Q8C494  | Gm14492 | 0.9454683 | 0.5511072 | 0.1299504 | 0.8743196 | 0.5967705 | 0.7221339 | 0.4401958 | 0.6699704 |
| Q3V0D0  | Gm15612 | -1.103826 | 0.8953895 | 0.257447  | 0.8743196 | -0.758343 | 0.9213329 | 0.4419331 | 0.6699704 |
| Q3UKG2  | Gm1614  | -0.980051 | 0.7138524 | 0.2121458 | 0.8743196 | -0.720513 | 0.2690421 | 0.0366304 | 0.6209341 |
| Q9D673  | Gm16491 | 0.99561   | 0.901241  | 0.3058046 | 0.8743196 | 0.0337374 | 1.0677954 | 0.9758195 | 0.776185  |
| Q8C385  | Gm16496 | 2.8816999 | 1.6604557 | 0.1262365 | 0.8743196 | 3.5389731 | 1.6898262 | 0.0811165 | 0.6209341 |
| Q8C6U3  | Gm17334 | -0.404693 | 0.4622313 | 0.4103247 | 0.8743196 | -0.278665 | 0.9242988 | 0.7732183 | 0.7428116 |
| Q6P8I3  | Gm1943  | -0.844836 | 0.9844878 | 0.4192212 | 0.8743196 | -0.703698 | 0.6453024 | 0.3173414 | 0.6594641 |
| A8R0W3  | Gm20516 | 0.4416126 | 0.6501184 | 0.5187826 | 0.8753373 | 0.4757006 | 0.5239833 | 0.3989496 | 0.6626324 |
| G3UY53  | Gm2381  | -0.786109 | 0.799412  | 0.35819   | 0.8743196 | -1.383743 | 0.8972447 | 0.1739613 | 0.6342694 |
| Q60648  | Gm2a    | -0.322794 | 0.3551152 | 0.3935784 | 0.8743196 | -0.856276 | 0.4277492 | 0.0921938 | 0.6209341 |
| A2AFI6  | Gm364   | 0.2397879 | 0.777708  | 0.7668069 | 0.8923639 | -0.780059 | 0.9804397 | 0.4565651 | 0.6712964 |
| D3Z3S5  | Gm4744  | -0.310843 | 0.3579423 | 0.4139452 | 0.8743196 | -2.231028 | 0.8693611 | 0.0425472 | 0.6209341 |
| Q8C0V7  | Gm4776  | 0.0477177 | 0.302392  | 0.8767183 | 0.9006736 | -0.153566 | 0.2369751 | 0.5282481 | 0.69337   |
| Q8C7C8  | Gm4814  | 0.1779001 | 0.6459788 | 0.7909639 | 0.8943678 | -0.607838 | 1.0835852 | 0.5951433 | 0.7056501 |
| B2RWH8  | Gm4846  | -1.469503 | 1.197652  | 0.2594899 | 0.8743196 | 0.589653  | 0.3980277 | 0.1889975 | 0.6405321 |
| Q497F4  | Gm4925  | -1.959401 | 1.1296022 | 0.126401  | 0.8743196 | -2.38086  | 0.7832837 | 0.022815  | 0.6209341 |
| Q3UED7  | Gm4951  | 0.3200379 | 0.4023171 | 0.4524564 | 0.8743196 | -1.109278 | 0.7583539 | 0.1938604 | 0.6418859 |
| Q3FW57  | Gm4952  | -0.402154 | 0.2558206 | 0.1203927 | 0.8743196 | -0.436487 | 0.4057939 | 0.2862572 | 0.6518056 |
| J3QP10  | Gm5117  | -2.116087 | 2.1550051 | 0.3588416 | 0.8743196 | 0.1407341 | 1.2252866 | 0.912305  | 0.7624298 |
| Q1AN92  | Gm5150  | -0.063916 | 0.7213178 | 0.9318734 | 0.9048359 | -0.01874  | 0.6609615 | 0.9783002 | 0.7762206 |
| Q6IFZ8  | Gm5414  | 1.0041712 | 0.7285117 | 0.2105247 | 0.8743196 | 1.1781415 | 0.7953834 | 0.1890521 | 0.6405321 |
| J3KMQ2  | Gm5422  | 0.0127678 | 0.2508148 | 0.9608231 | 0.9067461 | -0.105408 | 0.1459202 | 0.4972461 | 0.6823283 |
| D3YV11  | Gm5475  | 0.5034284 | 1.1113791 | 0.6642724 | 0.8900083 | -0.255022 | 0.8942527 | 0.7850955 | 0.7439428 |
| Q8C9X0  | Gm5533  | -0.541134 | 0.8168888 | 0.5288928 | 0.8753373 | -0.652841 | 0.4947834 | 0.2351306 | 0.6442378 |
| Q8C8T4  | Gm5546  | 0.3735866 | 0.8388758 | 0.6695192 | 0.8900083 | -1.67871  | 2.1662252 | 0.4678024 | 0.6738937 |
| Q8CDK1  | Gm5591  | -0.613377 | 0.7986416 | 0.4675846 | 0.8743196 | -1.564876 | 0.4954196 | 0.0195976 | 0.6209341 |
| D3Z4G3  | Gm5698  | 1.2552839 | 0.8558345 | 0.1858815 | 0.8743196 | 1.0536849 | 0.991468  | 0.3287852 | 0.6594641 |
| Q8CCC9  | Gm5785  | 0.2876573 | 0.5546243 | 0.6115696 | 0.8792876 | 1.0224752 | 0.3945662 | 0.0223683 | 0.6209341 |
| D3YTY6  | Gm6096  | -0.498534 | 0.6370004 | 0.4594982 | 0.8743196 | -0.907267 | 1.163619  | 0.4652051 | 0.6736081 |
| F8VPY8  | Gm684   | 1.9460266 | 0.6342646 | 0.0181143 | 0.8743196 | 2.0120388 | 0.6805352 | 0.0253962 | 0.6209341 |
| Q3TYW4  | Gm7276  | 0.5709479 | 0.7554019 | 0.474418  | 0.8743196 | -0.018586 | 0.8728758 | 0.9837023 | 0.7770843 |
| Q3V0P9  | Gm732   | 0.9594459 | 1.4812428 | 0.537816  | 0.8753373 | 1.4327143 | 1.4222542 | 0.3526475 | 0.6594641 |
| Q8C452  | Gm7628  | -1.422361 | 0.9412712 | 0.1745141 | 0.8743196 | 0.4527275 | 0.7298112 | 0.5578479 | 0.6980496 |
| F6QKH6  | Gm8975  | 1.1174399 | 0.9854667 | 0.2941637 | 0.8743196 | -0.630001 | 1.2464538 | 0.6312792 | 0.7120542 |
| Q9D303  | Gm8989  | 0.4975746 | 0.6513526 | 0.4698814 | 0.8743196 | 0.9021345 | 0.8314659 | 0.3195839 | 0.6594641 |
| Q8C4V6  | Gm9752  | -0.527603 | 0.5259891 | 0.3492336 | 0.8743196 | -0.17204  | 0.5647687 | 0.770945  | 0.7417488 |
| Q8C374  | Gm9801  | -1.641938 | 4.7386198 | 0.7391481 | 0.8923639 | 0.1403339 | 5.3329064 | 0.9798597 | 0.7762605 |

|        |         |           |           |           |           |           |           |           |           |
|--------|---------|-----------|-----------|-----------|-----------|-----------|-----------|-----------|-----------|
| F6YK59 | Gm9805  | 1.9266835 | 0.5911926 | 0.013884  | 0.8743196 | 1.307975  | 0.6952402 | 0.1089542 | 0.6209341 |
| Q9D2M0 | Gm9817  | 1.4921792 | 0.8552134 | 0.1245335 | 0.8743196 | 2.6019392 | 0.7928571 | 0.0167864 | 0.6209341 |
| Q8CBG8 | Gm9906  | -0.154423 | 0.8207967 | 0.8561065 | 0.8971839 | 0.7757382 | 0.5212761 | 0.1872783 | 0.6405321 |
| Q8CBJ6 | Gm9911  | -0.27574  | 1.1162573 | 0.8119793 | 0.8943678 | -0.196458 | 1.3440274 | 0.8885735 | 0.7592752 |
| Q8BQ83 | Gm9916  | -0.919749 | 1.1987492 | 0.468013  | 0.8743196 | 0.136584  | 0.411705  | 0.7513584 | 0.7375672 |
| A2AJA9 | Gm996   | -0.130629 | 0.4201177 | 0.7649055 | 0.8923639 | -1.402204 | 1.5154967 | 0.390535  | 0.6611124 |
| Q6PGG2 | Gmip    | 0.2544526 | 0.4063543 | 0.5510585 | 0.8753373 | -0.524392 | 0.7668212 | 0.5195914 | 0.6927469 |
| Q922H4 | Gmppa   | -0.603298 | 0.4108998 | 0.1555839 | 0.8743196 | -0.128477 | 0.267905  | 0.6367426 | 0.7137275 |
| Q8BTZ7 | Gmppb   | 0.8567821 | 0.4779365 | 0.0827899 | 0.8743196 | -0.139389 | 0.6216199 | 0.8242621 | 0.7492441 |
| Q9DCZ1 | Gmpr    | -0.32907  | 0.3246084 | 0.3151436 | 0.8743196 | -0.050358 | 0.2569124 | 0.8454286 | 0.753234  |
| Q3THK7 | Gmps    | -0.003868 | 0.3422918 | 0.9910568 | 0.909535  | -0.400257 | 0.4217435 | 0.3510117 | 0.6594641 |
| P08752 | Gnai2   | 1.0188971 | 0.3002228 | 0.0115395 | 0.8743196 | 0.778969  | 0.2990128 | 0.040383  | 0.6209341 |
| Q6R0H6 | Gnas    | -0.112092 | 0.3062674 | 0.7251793 | 0.8910745 | -0.558543 | 0.5872498 | 0.3782689 | 0.6594641 |
| P62874 | Gnb1    | 0.0041083 | 0.2187609 | 0.9855408 | 0.9078335 | -0.107713 | 0.1872227 | 0.585987  | 0.7049451 |
| P62880 | Gnb2    | 0.390869  | 0.7207288 | 0.6044224 | 0.8792876 | 0.3942646 | 0.5887031 | 0.5279552 | 0.69337   |
| P68040 | Gnb2l1  | 0.0193135 | 0.2801905 | 0.9451903 | 0.9060514 | 0.1713086 | 0.3158004 | 0.5889562 | 0.7049451 |
| P29387 | Gnb4    | -0.250238 | 0.5209296 | 0.6456138 | 0.8896469 | -1.978392 | 1.4432022 | 0.2194925 | 0.6434585 |
| Q91WG8 | Gne     | 0.4287029 | 0.4290745 | 0.3228461 | 0.8743196 | 0.5831325 | 0.4638941 | 0.2158539 | 0.6434585 |
| Q9DAS9 | Gng12   | -0.347729 | 0.5768862 | 0.5556666 | 0.8753373 | -0.320089 | 0.8066821 | 0.6979545 | 0.7265263 |
| Q9QXF8 | Gnmt    | 0.1713791 | 0.3838904 | 0.6561001 | 0.8900083 | 0.7801696 | 0.3825003 | 0.0439196 | 0.6209341 |
| Q692V3 | Gnn     | 0.0642332 | 0.3708649 | 0.8673974 | 0.898064  | 0.1085186 | 0.4098686 | 0.8000516 | 0.7439428 |
| P98192 | Gnpat   | -1.452112 | 0.5525932 | 0.0340205 | 0.8743196 | -1.241091 | 0.7736286 | 0.1597815 | 0.6243427 |
| Q9JK38 | Gnpat1  | 0.2962554 | 0.7899128 | 0.7128745 | 0.8910745 | 0.3456717 | 0.9045673 | 0.7085313 | 0.728514  |
| Q01776 | Gnrhr   | -1.001168 | 1.2558763 | 0.4515311 | 0.8743196 | -0.488049 | 0.6215886 | 0.4622252 | 0.6726357 |
| P55937 | Golga3  | -0.905991 | 1.4962696 | 0.5639547 | 0.8753373 | -0.406674 | 0.4505016 | 0.4014636 | 0.6629633 |
| Q91VW5 | Golga4  | -2.564137 | 2.9831161 | 0.418498  | 0.8743196 | -0.667475 | 0.7384068 | 0.4008629 | 0.6629633 |
| Q9CRA5 | Golph3  | 1.652127  | 0.666901  | 0.0423761 | 0.8743196 | 1.8237392 | 0.8083817 | 0.0649005 | 0.6209341 |
| Q8BH60 | Gopc    | 0.3917723 | 0.4423692 | 0.3849866 | 0.8743196 | 0.8142001 | 0.4702691 | 0.0987879 | 0.6209341 |
| Q99JX3 | Gorasp2 | -0.122136 | 0.5332401 | 0.8200304 | 0.8943678 | 0.5387898 | 0.4693003 | 0.2589533 | 0.6500471 |
| P05201 | Got1    | -0.182952 | 0.2464838 | 0.4589327 | 0.8743196 | 0.2145164 | 0.2125731 | 0.3145    | 0.6594641 |
| P05202 | Got2    | 0.0287599 | 0.1910167 | 0.88044   | 0.9006736 | -0.086528 | 0.2022998 | 0.6692662 | 0.7222728 |
| Q9D733 | Gp2     | -0.397697 | 0.5040231 | 0.4559742 | 0.8743196 | -0.260387 | 0.1503753 | 0.1340614 | 0.6209341 |
| Q61586 | Gpam    | 0.4239185 | 1.2654809 | 0.74745   | 0.8923639 | -0.151748 | 1.5856134 | 0.9268727 | 0.763737  |
| A2A6A1 | Gpatch8 | -1.351217 | 0.6829685 | 0.0883839 | 0.8743196 | -2.641278 | 2.4195227 | 0.3168703 | 0.6594641 |
| Q8C0L9 | Gpcpd1  | -0.400745 | 0.3741892 | 0.3197134 | 0.8743196 | -1.387028 | 0.723584  | 0.103713  | 0.6209341 |
| P13707 | Gpd1    | -0.086262 | 0.1915361 | 0.6529789 | 0.8900083 | 0.1691055 | 0.1857096 | 0.3638807 | 0.6594641 |
| Q3ULJ0 | Gpd1l   | -0.150901 | 0.2950753 | 0.6102585 | 0.8792876 | 0.1070611 | 0.2786502 | 0.7018028 | 0.7266885 |
| Q64521 | Gpd2    | -0.128051 | 0.4600361 | 0.7825926 | 0.8940257 | -0.431795 | 0.4528707 | 0.3488142 | 0.6594641 |
| Q8BUV3 | Gphn    | 0.2866708 | 0.2328393 | 0.2219024 | 0.8743196 | 0.1082475 | 0.3031519 | 0.7221266 | 0.7304131 |
| P06745 | Gpi     | -0.190823 | 0.1580886 | 0.2287335 | 0.8743196 | 0.1187649 | 0.1473357 | 0.421213  | 0.6694352 |
| O70362 | Gpld1   | 0.5008231 | 0.5255411 | 0.3723462 | 0.8743196 | -1.073499 | 1.0329978 | 0.3387619 | 0.6594641 |
| Q9D3W4 | Gpn3    | -0.009815 | 1.6855283 | 0.9955164 | 0.9101811 | 2.8012009 | 1.6712785 | 0.1447383 | 0.6209341 |
| Q8K087 | Gpr1    | -0.390656 | 0.4267868 | 0.3904534 | 0.8743196 | -0.580157 | 0.3468966 | 0.1454709 | 0.6209341 |
| Q8BUV8 | Gpr107  | 0.0844552 | 0.5838313 | 0.8890587 | 0.9006736 | -0.135113 | 0.4756616 | 0.7859176 | 0.7439428 |
| P35412 | Gpr12   | 0.0029789 | 0.5102882 | 0.9955051 | 0.9101811 | -0.340127 | 0.4585434 | 0.4862456 | 0.6799512 |
| Q7TT36 | Gpr125  | -0.011358 | 0.2354371 | 0.9628722 | 0.9067461 | -0.148901 | 0.1734024 | 0.4234774 | 0.6694352 |
| Q80ZU9 | Gpr137  | -0.042384 | 0.7326805 | 0.955486  | 0.9060514 | -0.963751 | 0.9237105 | 0.3369897 | 0.6594641 |
| Q8C206 | Gpr157  | 0.3457676 | 0.9753114 | 0.7333889 | 0.8923639 | -0.494602 | 1.6628238 | 0.7761548 | 0.7428116 |
| Q3U3F9 | Gpr160  | 0.9379143 | 0.8781333 | 0.3023741 | 0.8743196 | 1.6827909 | 0.8427474 | 0.0672254 | 0.6209341 |
| Q3UN16 | Gpr162  | 0.1600365 | 0.7417256 | 0.8353252 | 0.8943678 | 0.7383909 | 0.5583484 | 0.2341888 | 0.6442378 |
| Q6NS65 | Gpr17   | -2.501377 | 1.7395244 | 0.1936064 | 0.8743196 | 0.217372  | 0.1963127 | 0.3105801 | 0.6577795 |
| Q8BPS4 | Gpr180  | 0.6508105 | 1.7742071 | 0.7245925 | 0.8910745 | 1.9898429 | 1.0409355 | 0.1044772 | 0.6209341 |
| Q99JG2 | Gpr3711 | 0.3545956 | 0.3633524 | 0.3616255 | 0.8743196 | 0.1487645 | 0.45996   | 0.7573459 | 0.7380771 |
| Q5U431 | Gpr39   | -0.027437 | 0.3124408 | 0.9324841 | 0.9048359 | -0.40374  | 0.297976  | 0.2242258 | 0.6442378 |
| Q61038 | Gpr65   | 0.158749  | 0.8635494 | 0.8566064 | 0.897347  | 0.7950721 | 0.5405605 | 0.1651246 | 0.6282331 |
| Q8BW93 | Gpr77   | -0.492233 | 0.5406742 | 0.3928777 | 0.8743196 | -1.376817 | 1.1387567 | 0.27212   | 0.6500471 |
| Q5U4C1 | Gprasp1 | 0.4683906 | 0.6024895 | 0.4623679 | 0.8743196 | -0.342481 | 0.4794475 | 0.5018577 | 0.6823283 |
| Q8BWS5 | Gprin3  | -0.701037 | 0.8206797 | 0.4212543 | 0.8743196 | -2.146149 | 1.7028397 | 0.2543455 | 0.6500471 |
| Q99LD4 | Gps1    | 1.5026193 | 0.6010959 | 0.020003  | 0.8743196 | 0.9577932 | 0.7797724 | 0.2335939 | 0.6442378 |
| Q6IR34 | Gpsm1   | -1.538208 | 0.941847  | 0.1464486 | 0.8743196 | -0.880948 | 0.6580945 | 0.2291783 | 0.6442378 |
| Q8QZR5 | Gpt     | 0.2229703 | 0.3351441 | 0.5069322 | 0.8753373 | 0.5590798 | 0.2929109 | 0.0585932 | 0.6209341 |

|        |         |           |           |           |           |           |           |           |           |
|--------|---------|-----------|-----------|-----------|-----------|-----------|-----------|-----------|-----------|
| Q8BGT5 | Gpt2    | 0.0286934 | 0.326403  | 0.9301349 | 0.9048359 | 0.2935431 | 0.3392119 | 0.3893312 | 0.6611124 |
| P11352 | Gpx1    | 0.101048  | 0.3129891 | 0.7474174 | 0.8923639 | 0.3150029 | 0.2690983 | 0.2446329 | 0.6500471 |
| P46412 | Gpx3    | -1.206926 | 0.7485263 | 0.1277108 | 0.8743196 | -0.385639 | 0.1788416 | 0.0503715 | 0.6209341 |
| Q8CB44 | Gramd4  | -0.3878   | 0.412232  | 0.3781636 | 0.8743196 | -1.711545 | 1.0438706 | 0.1521967 | 0.6211692 |
| O89100 | Grap2   | 0.9341139 | 0.7441866 | 0.2496799 | 0.8743196 | 1.745333  | 0.8670243 | 0.0907745 | 0.6209341 |
| A2ASX1 | Grb14   | 0.6903088 | 0.5704949 | 0.265543  | 0.8743196 | -0.085331 | 0.7659893 | 0.9149322 | 0.7627031 |
| Q60631 | Grb2    | -0.193985 | 0.5292996 | 0.7173464 | 0.8910745 | 0.1329068 | 0.4666984 | 0.7787399 | 0.7430065 |
| Q91Z53 | Grhpr   | 0.0567908 | 0.2495289 | 0.8204145 | 0.8943678 | 0.3969769 | 0.241768  | 0.1040851 | 0.6209341 |
| P23818 | Gria1   | 0.2525354 | 0.7310141 | 0.7398981 | 0.8923639 | -0.267251 | 0.720114  | 0.7232973 | 0.730562  |
| Q0QWG9 | Grid2ip | 2.1739227 | 0.7086743 | 0.0181288 | 0.8743196 | 0.6800336 | 1.0841822 | 0.5536109 | 0.6980496 |
| Q60934 | Grik1   | -0.317371 | 0.3548618 | 0.4008383 | 0.8743196 | -2.447359 | 1.3571908 | 0.1214042 | 0.6209341 |
| P35438 | Grin1   | 1.7320957 | 0.503438  | 0.0108293 | 0.8743196 | 0.7601714 | 0.5205925 | 0.1945302 | 0.6418859 |
| Q91ZU9 | Grin3b  | 0.5382164 | 0.9440871 | 0.5864387 | 0.8753373 | 0.7818908 | 0.7584971 | 0.3423649 | 0.6594641 |
| Q8VD04 | Gripap1 | -0.228287 | 1.1143732 | 0.8435136 | 0.8958903 | 0.3708294 | 0.4692962 | 0.4595032 | 0.6712964 |
| Q8VEB1 | Grk5    | -1.67229  | 0.7765232 | 0.0682538 | 0.8743196 | -2.52712  | 1.3021446 | 0.1003394 | 0.6209341 |
| P97772 | Grm1    | -0.613459 | 0.8438489 | 0.4908314 | 0.8743196 | -0.29722  | 0.3022048 | 0.3633397 | 0.6594641 |
| Q5NCH9 | Grm6    | -0.23088  | 0.4835295 | 0.647563  | 0.8896469 | -0.166733 | 0.6771243 | 0.8137063 | 0.7470412 |
| P28798 | Grn     | -0.066746 | 0.4927495 | 0.8931267 | 0.9006736 | 0.0991087 | 0.5955306 | 0.8690658 | 0.7571111 |
| Q99LP6 | Grpel1  | 0.3205734 | 0.2760459 | 0.2498993 | 0.8743196 | -0.37782  | 0.4328647 | 0.386547  | 0.6611124 |
| Q8C5Q4 | Grsf1   | -0.93763  | 0.5330363 | 0.1219737 | 0.8743196 | 0.3868048 | 0.4004577 | 0.371393  | 0.6594641 |
| Q810D6 | Grwd1   | -0.092565 | 0.2215427 | 0.6885971 | 0.8900083 | 0.0035367 | 0.1259915 | 0.9785157 | 0.7762206 |
| Q32M21 | Gsdma2  | 0.4646256 | 0.3487227 | 0.2244775 | 0.8743196 | -0.080148 | 0.3897985 | 0.843891  | 0.7529159 |
| Q9D8T2 | Gsdmdc1 | 0.1799131 | 0.6393663 | 0.7865456 | 0.8943678 | -0.669126 | 0.8588121 | 0.4655132 | 0.6736081 |
| Q9Z0R0 | Gsg2    | -0.049977 | 0.8643046 | 0.9555051 | 0.9060514 | -1.436308 | 1.0457944 | 0.2187333 | 0.6434585 |
| P13020 | Gsn     | 0.0433621 | 0.3766194 | 0.9086035 | 0.9048359 | 0.2512137 | 0.4031612 | 0.5350778 | 0.695758  |
| P47791 | Gsr     | 0.3355337 | 0.3010425 | 0.268413  | 0.8743196 | 0.7389868 | 0.3068309 | 0.018696  | 0.6209341 |
| P51855 | Gss     | 0.0455442 | 0.3623061 | 0.9002301 | 0.9033704 | 0.2424888 | 0.2840813 | 0.3957894 | 0.6617584 |
| P30115 | Gsta3   | -0.169129 | 0.2910825 | 0.5627185 | 0.8753373 | 0.0947915 | 0.2224666 | 0.6712445 | 0.7227095 |
| P24472 | Gsta4   | 0.357961  | 0.3457932 | 0.3085893 | 0.8743196 | 0.1726489 | 0.5774143 | 0.7672267 | 0.7401549 |
| Q5RL51 | Gstcd   | -0.709267 | 1.0619261 | 0.5255951 | 0.8753373 | -1.022118 | 1.1139294 | 0.394227  | 0.6617584 |
| Q9DCM2 | Gstk1   | 0.7058164 | 0.8593681 | 0.4156107 | 0.8743196 | 0.4761835 | 0.8267301 | 0.5677743 | 0.6997388 |
| P10649 | Gstm1   | -0.111278 | 0.3005442 | 0.7116397 | 0.8910745 | 0.2332481 | 0.3109284 | 0.4543065 | 0.6712964 |
| P15626 | Gstm2   | 0.1403456 | 0.4108187 | 0.7344677 | 0.8923639 | 0.5205472 | 0.336767  | 0.1314306 | 0.6209341 |
| P19639 | Gstm3   | 0.1273778 | 0.3395954 | 0.708714  | 0.8910745 | -0.036641 | 0.3210058 | 0.9094931 | 0.7615898 |
| P48774 | Gstm5   | -0.082801 | 0.3442981 | 0.811531  | 0.8943678 | -0.468778 | 0.3757153 | 0.2228561 | 0.6442378 |
| O35660 | Gstm6   | -0.653406 | 0.5301485 | 0.2367336 | 0.8743196 | -0.121001 | 0.4188375 | 0.7772147 | 0.7428116 |
| Q80W21 | Gstm7   | 0.3663435 | 0.4572269 | 0.4278538 | 0.8743196 | 0.825725  | 0.3572792 | 0.0270182 | 0.6209341 |
| O09131 | Gsto1   | -0.118982 | 0.3151351 | 0.7066787 | 0.8910745 | 0.1200054 | 0.2881442 | 0.678235  | 0.7239064 |
| P19157 | Gstp1   | -0.264659 | 0.250785  | 0.2939548 | 0.8743196 | -0.464958 | 0.3441535 | 0.1803611 | 0.6391063 |
| P46425 | Gstp2   | -0.115064 | 0.2336048 | 0.6373975 | 0.8883187 | -0.359045 | 0.202139  | 0.1260332 | 0.6209341 |
| Q64471 | Gstt1   | 0.4822233 | 0.3143462 | 0.1283407 | 0.8743196 | 0.7198158 | 0.3526799 | 0.0444295 | 0.6209341 |
| Q61133 | Gstt2   | -0.05245  | 0.5727836 | 0.927628  | 0.9048359 | -0.03449  | 0.4208404 | 0.9352876 | 0.7669305 |
| Q9WVL0 | Gstz1   | 0.1631846 | 0.4270098 | 0.7029461 | 0.8907355 | 0.1003114 | 0.4438988 | 0.8216093 | 0.7486349 |
| Q8BW56 | Gtdc1   | -0.263598 | 0.8427856 | 0.7635673 | 0.8923639 | 0.0827481 | 0.5594876 | 0.887267  | 0.7592752 |
| Q9ESZ8 | Gtf2i   | 2.114184  | 4.8587939 | 0.6765718 | 0.8900083 | -3.40035  | 3.3973718 | 0.3555266 | 0.6594641 |
| Q3UJK4 | Gtpbp2  | 3.1292768 | 1.3600089 | 0.0549163 | 0.8743196 | 2.015173  | 1.9039028 | 0.3305929 | 0.6594641 |
| Q8R080 | Gtse1   | -0.713951 | 0.3728336 | 0.0970507 | 0.8743196 | -0.80227  | 0.1931458 | 0.0059863 | 0.6209341 |
| O09051 | Guca2b  | 0.8391886 | 0.8225591 | 0.3415839 | 0.8743196 | 0.8157411 | 0.8429893 | 0.3705769 | 0.6594641 |
| O54865 | Gucy1b3 | -0.087622 | 0.8571355 | 0.9214438 | 0.9048359 | -0.374317 | 1.0296193 | 0.728661  | 0.7323934 |
| Q3UWA6 | Gucy2c  | -0.037191 | 0.8328261 | 0.9649706 | 0.9067461 | 0.287512  | 0.663961  | 0.6720941 | 0.7227095 |
| Q5SDA5 | Gucy2f  | -0.227188 | 0.7789404 | 0.7789986 | 0.8940257 | 0.4592251 | 0.8081583 | 0.5904905 | 0.7051736 |
| Q6TL19 | Gucy2g  | -0.311915 | 0.3188904 | 0.360598  | 0.8743196 | -0.495321 | 0.2775041 | 0.1245267 | 0.6209341 |
| Q64520 | Guk1    | 0.379447  | 0.5360236 | 0.5018951 | 0.8753373 | 0.8146971 | 0.3485087 | 0.0580289 | 0.6209341 |
| P58710 | Gulo    | 0.0165936 | 0.2857908 | 0.9538212 | 0.9060514 | -0.386163 | 0.2580016 | 0.1382519 | 0.6209341 |
| Q8K2A1 | Gulp1   | -0.148426 | 0.6059355 | 0.8135184 | 0.8943678 | -1.291927 | 0.9717856 | 0.2320149 | 0.6442378 |
| Q3UMM9 | Gxylt2  | 0.2199498 | 1.0560504 | 0.8409441 | 0.8953809 | -0.103166 | 1.0700859 | 0.9263352 | 0.7636286 |
| Q810K9 | Gxylt2  | 1.9886759 | 1.2423519 | 0.1534692 | 0.8743196 | 2.0147949 | 1.3369849 | 0.1825385 | 0.6395902 |
| Q9R062 | Gyg1    | -0.574137 | 0.3867619 | 0.1477819 | 0.8743196 | -0.850671 | 0.7436106 | 0.2626758 | 0.6500471 |
| Q9Z1E4 | Gys1    | 0.2047399 | 0.461607  | 0.6584783 | 0.8900083 | 0.6343806 | 0.4406672 | 0.1540895 | 0.6211692 |
| Q8VCB3 | Gys2    | 0.1283114 | 0.4148051 | 0.7580918 | 0.8923639 | -0.00248  | 0.3816378 | 0.9948381 | 0.7793235 |
| P10922 | H1f0    | 2.4922875 | 1.1474301 | 0.0664147 | 0.8743196 | 2.8824324 | 1.028521  | 0.0310614 | 0.6209341 |

|        |           |           |           |           |           |           |           |           |            |
|--------|-----------|-----------|-----------|-----------|-----------|-----------|-----------|-----------|------------|
| G3UXW2 | H2-K1     | 1.1040982 | 0.9302475 | 0.2739854 | 0.8743196 | 1.2343555 | 1.0420866 | 0.2810032 | 0.6506857  |
| P01901 | H2-K1     | -0.232392 | 0.828494  | 0.7872036 | 0.8943678 | 0.8517844 | 0.3517183 | 0.0517377 | 0.6209341  |
| P01898 | H2-Q10    | -0.714379 | 0.4854939 | 0.1512497 | 0.8743196 | -0.056425 | 0.3745331 | 0.8813693 | 0.7585208  |
| Q3TM01 | H60a      | -0.393474 | 0.474361  | 0.4342028 | 0.8743196 | -1.06218  | 0.4903361 | 0.073443  | 0.6209341  |
| Q8CFX1 | H6pd      | -0.26434  | 0.3312121 | 0.4288275 | 0.8743196 | 0.1339621 | 0.2323907 | 0.567461  | 0.6997388  |
| Q78JT3 | Haao      | -0.047463 | 0.2418193 | 0.8446442 | 0.8962775 | -0.076222 | 0.2536251 | 0.7642225 | 0.7393825  |
| Q9JKS5 | Habp4     | 0.1788883 | 0.6943265 | 0.8040924 | 0.8943678 | -0.214469 | 0.8557445 | 0.8104677 | 0.7465637  |
| Q9QXE0 | Hac1      | -0.059577 | 0.275438  | 0.8290197 | 0.8943678 | -0.112518 | 0.2965562 | 0.7049295 | 0.7280697  |
| Q61425 | Hadh      | 0.0651074 | 0.1920732 | 0.7350375 | 0.8923639 | -0.312907 | 0.2499652 | 0.2125522 | 0.6429844  |
| Q8BMS1 | Hadha     | -0.025955 | 0.158597  | 0.8700876 | 0.898064  | 0.0999008 | 0.1694721 | 0.5559352 | 0.6980496  |
| Q99JY0 | Hadhb     | -0.12731  | 0.187099  | 0.4969564 | 0.8748057 | -0.023142 | 0.1978555 | 0.9070149 | 0.7612577  |
| Q99KB8 | Hagh      | -0.107493 | 0.2042098 | 0.599846  | 0.8772764 | -0.068645 | 0.1807076 | 0.7050121 | 0.7280697  |
| P35492 | Hal       | -0.018537 | 0.3112573 | 0.9526774 | 0.9060514 | -0.201888 | 0.249313  | 0.4211645 | 0.6694352  |
| Q9WU19 | Hao1      | -0.077283 | 0.528901  | 0.8847724 | 0.9006736 | 0.2972151 | 0.5465217 | 0.591021  | 0.7051736  |
| Q61035 | Hars      | -0.019066 | 0.5030461 | 0.9699277 | 0.9072902 | 0.3903952 | 0.4806654 | 0.4213692 | 0.6694352  |
| Q99KK9 | Hars2     | 0.6645065 | 0.1211549 | 0.0009213 | 0.8743196 | 0.4591276 | 0.1649087 | 0.031823  | 0.6209341  |
| O08650 | Has3      | 1.9970063 | 1.7554746 | 0.2927278 | 0.8743196 | 1.5087045 | 1.7974649 | 0.4334352 | 0.6697843  |
| P01942 | Hba       | 0.2542185 | 0.2428098 | 0.2965499 | 0.8743196 | 0.2408037 | 0.2462087 | 0.329595  | 0.6594641  |
| P02088 | Hbb-b1    | 0.1341385 | 0.2943857 | 0.6502043 | 0.8900083 | 0.139428  | 0.2489578 | 0.5777217 | 0.7021424  |
| B2RVB7 | Hbb-bh2   | -1.125261 | 1.2741462 | 0.4064618 | 0.8743196 | 0.4446638 | 0.3884413 | 0.2959193 | 0.6540599  |
| P53702 | Hccs      | 0.7355871 | 0.4523255 | 0.1479264 | 0.8743196 | -0.15361  | 0.620892  | 0.812845  | 0.746797   |
| Q9D968 | Hcfc2     | -0.741338 | 0.7350692 | 0.3467839 | 0.8743196 | -1.11848  | 1.0624516 | 0.3330001 | 0.6594641  |
| P49710 | Hcls1     | 0.4442054 | 0.3702617 | 0.2692789 | 0.8743196 | 0.4857688 | 0.3280421 | 0.1891581 | 0.6405321  |
| O88705 | Hcn3      | -0.353337 | 2.0616301 | 0.8687685 | 0.898064  | 3.1973166 | 1.0629717 | 0.0237647 | 0.6209341  |
| O70507 | Hcn4      | -0.411785 | 0.537449  | 0.468611  | 0.8743196 | -0.235757 | 0.202438  | 0.2883911 | 0.652142   |
| P58308 | Hcrtr2    | 0.5490659 | 0.7792116 | 0.503795  | 0.8753373 | 0.3771333 | 0.8766151 | 0.6820622 | 0.7239064  |
| P23738 | Hdc       | 0.3668934 | 1.3519327 | 0.7939245 | 0.8943678 | -0.277139 | 1.1138106 | 0.8117975 | 0.7465637  |
| P51859 | Hdgi      | -0.198954 | 0.3194333 | 0.5359665 | 0.8753373 | -0.30621  | 0.3657582 | 0.4066332 | 0.6650297  |
| Q3UGR5 | Hdhd2     | -0.028805 | 0.4325297 | 0.9472426 | 0.9060514 | 0.2383704 | 0.3725698 | 0.5265903 | 0.69337    |
| Q9CYW4 | Hdhd3     | -0.760573 | 0.5568925 | 0.1852274 | 0.8743196 | -0.915506 | 1.0221418 | 0.3810807 | 0.6606339  |
| Q8VDJ3 | Hdlbp     | 0.5759678 | 0.5419258 | 0.2960747 | 0.8743196 | 0.5666612 | 0.5806757 | 0.3377941 | 0.6594641  |
| Q5PRF0 | Heatr5a   | 0.2315003 | 0.5901952 | 0.6975621 | 0.8900083 | 0.4577196 | 0.5503722 | 0.412899  | 0.6675611  |
| Q8C547 | Heatr5b   | -0.154697 | 0.348177  | 0.6702322 | 0.8900083 | -0.528573 | 0.390394  | 0.2245253 | 0.6442378  |
| Q6P1G0 | Heatr6    | 0.206759  | 0.5796753 | 0.7262986 | 0.8910745 | -0.171898 | 0.7211837 | 0.8153212 | 0.7474231  |
| Q7M6Y6 | Heatr7b2  | -0.566443 | 0.9917753 | 0.5857655 | 0.8753373 | -1.063884 | 1.9180108 | 0.5991643 | 0.7061107  |
| Q9R257 | Hebp1     | -1.043143 | 1.0962824 | 0.3730267 | 0.8743196 | -0.401459 | 0.9819095 | 0.6968386 | 0.7265263  |
| Q69ZR2 | Hectd1    | 0.0919208 | 0.3312608 | 0.7828714 | 0.8940257 | 0.1644165 | 0.3794187 | 0.6675063 | 0.7215904  |
| Q60848 | Hells     | -0.247917 | 0.8989217 | 0.7906704 | 0.8943678 | 0.2514714 | 0.6202497 | 0.6992182 | 0.7266885  |
| Q2VPA6 | Helq      | -1.38222  | 1.5238182 | 0.3945187 | 0.8743196 | -1.920928 | 1.9153137 | 0.3546115 | 0.6594641  |
| Q9Z0Z4 | Heph      | -0.230391 | 1.1144782 | 0.842109  | 0.8955988 | 0.0985168 | 1.0539782 | 0.9285722 | 0.7645476  |
| Q4U2R1 | Herc2     | -0.132971 | 0.3112712 | 0.6721967 | 0.8900083 | -0.358865 | 0.3139599 | 0.2630616 | 0.6500471  |
| Q9JJC9 | Herpud2   | 0.4903451 | 0.4287164 | 0.2903279 | 0.8743196 | 0.4824615 | 0.5135945 | 0.3837947 | 0.6606339  |
| O54792 | Hes2      | 1.8286596 | 1.2800857 | 0.1961981 | 0.8743196 | 0.7296519 | 1.5608181 | 0.6566521 | 0.71199612 |
| Q3TVI4 | Hexim2    | 0.772913  | 0.6539138 | 0.2758048 | 0.8743196 | 0.5408701 | 1.0513128 | 0.6253168 | 0.7113805  |
| Q7TQ32 | Hfe2      | -0.727125 | 0.9579748 | 0.4726181 | 0.8743196 | -0.982952 | 1.0062222 | 0.366358  | 0.6594641  |
| O09173 | Hgd       | -0.293611 | 0.2578447 | 0.2563111 | 0.8743196 | -0.651402 | 0.3147422 | 0.040094  | 0.6209341  |
| Q99LI8 | Hgs       | -0.317983 | 1.3944382 | 0.8261356 | 0.8943678 | 1.0567226 | 0.9785779 | 0.3216902 | 0.6594641  |
| Q9D1G3 | Hhat1     | -0.531296 | 0.9994952 | 0.6114721 | 0.8792876 | -0.305139 | 0.647311  | 0.6540107 | 0.7198872  |
| P70187 | Hiat1     | -0.383821 | 1.2512977 | 0.7679655 | 0.8923639 | 0.0793484 | 0.9394395 | 0.9354356 | 0.7669305  |
| Q99L13 | Hibadh    | -0.117178 | 0.2830232 | 0.6796028 | 0.8900083 | 0.1797687 | 0.2593944 | 0.4898339 | 0.6803412  |
| Q8QZS1 | Hibch     | 0.2811939 | 0.2233228 | 0.2098265 | 0.8743196 | 0.3277549 | 0.2374789 | 0.1697583 | 0.6323131  |
| Q9D6X3 | Hif1an    | -2.435891 | 1.3336834 | 0.1105207 | 0.8743196 | 0.3823224 | 0.5119882 | 0.4834435 | 0.6796099  |
| P70349 | Hint1     | -0.106892 | 0.2554385 | 0.6768719 | 0.8900083 | 0.3461424 | 0.2966739 | 0.247782  | 0.6500471  |
| Q9D0S9 | Hint2     | 0.4358852 | 0.4423551 | 0.3282097 | 0.8743196 | 0.760126  | 0.4531652 | 0.099145  | 0.6209341  |
| O88904 | Hipk1     | 0.4249915 | 1.0440703 | 0.6961286 | 0.8900083 | 0.9188738 | 0.9056517 | 0.3494496 | 0.6594641  |
| Q3V016 | Hipk4     | 0.4917046 | 0.4403416 | 0.301004  | 0.8743196 | -0.700269 | 0.6982867 | 0.3546524 | 0.6594641  |
| P43275 | Hist1h1a  | 0.0809969 | 0.3867877 | 0.8400928 | 0.895241  | -0.266528 | 0.2035419 | 0.2382878 | 0.6456045  |
| P62806 | Hist1h4a; | 0.3182055 | 0.4631158 | 0.4971299 | 0.8748057 | 0.085391  | 0.6658771 | 0.8989108 | 0.7608777  |
| Q03172 | Hivep1    | -0.635206 | 0.8567668 | 0.4825781 | 0.8743196 | -0.574117 | 0.4778781 | 0.2748675 | 0.6500471  |
| A2A884 | Hivep3    | -0.27858  | 0.2177826 | 0.2416073 | 0.8743196 | -0.347295 | 0.0627659 | 0.0014688 | 0.5840626  |
| P17710 | Hk1       | 0.2463661 | 0.3460531 | 0.4874333 | 0.8743196 | -1.570516 | 0.9914933 | 0.1372109 | 0.6209341  |

|        |            |           |           |           |           |           |           |           |           |
|--------|------------|-----------|-----------|-----------|-----------|-----------|-----------|-----------|-----------|
| O08528 | Hk2        | 0.0339144 | 0.1916955 | 0.8597774 | 0.897347  | -0.232667 | 0.2518    | 0.3569326 | 0.6594641 |
| Q8BW74 | Hlf        | -0.118791 | 0.5100957 | 0.8225173 | 0.8943678 | -0.219836 | 0.5286348 | 0.6919788 | 0.7249553 |
| Q9D8V0 | Hm13       | 1.2516826 | 0.8661166 | 0.1916465 | 0.8743196 | -1.344067 | 1.0879761 | 0.2628633 | 0.6500471 |
| P22907 | Hmbs       | -0.102918 | 0.2048187 | 0.6226229 | 0.8826986 | -0.273515 | 0.1600957 | 0.1113044 | 0.6209341 |
| P63158 | Hmgb1      | -0.345778 | 0.4650049 | 0.4627169 | 0.8743196 | -0.213052 | 0.3741889 | 0.5738116 | 0.7015295 |
| Q80YZ1 | Hmgb1-rs18 | 0.6213611 | 1.1510914 | 0.6060713 | 0.8792876 | -2.140963 | 3.3426642 | 0.5455184 | 0.6979269 |
| P30681 | Hmgb2      | 0.6446176 | 0.8798339 | 0.4875689 | 0.8743196 | -0.672606 | 1.0954122 | 0.5617444 | 0.6997388 |
| P38060 | Hmgcl      | 0.1770847 | 0.2219489 | 0.4271228 | 0.8743196 | -0.209782 | 0.2674226 | 0.4352104 | 0.6699704 |
| Q01237 | Hmgcr      | -0.384937 | 0.9922052 | 0.7095729 | 0.8910745 | 0.1601043 | 0.8546855 | 0.8575796 | 0.7556239 |
| Q8JZK9 | Hmgcs1     | -0.461111 | 0.2984459 | 0.1263332 | 0.8743196 | -0.593124 | 0.3174436 | 0.0659468 | 0.6209341 |
| P54869 | Hmgcs2     | -0.008521 | 0.2060163 | 0.9670406 | 0.9068652 | -0.253205 | 0.2438583 | 0.3002408 | 0.6540599 |
| P97825 | Hn1        | -0.402156 | 0.5906112 | 0.5178082 | 0.8753373 | -1.46354  | 0.5309078 | 0.0329989 | 0.6209341 |
| Q6PGH2 | Hn1l       | -0.65545  | 0.4850204 | 0.2186148 | 0.8743196 | -3.482797 | 1.7357378 | 0.0915948 | 0.6209341 |
| P49698 | Hnf4a      | -0.339494 | 0.8037727 | 0.685422  | 0.8900083 | -1.011709 | 1.2357367 | 0.4442455 | 0.6699704 |
| Q91VF2 | Hnmt       | -0.300847 | 0.5125413 | 0.5659535 | 0.8753373 | 0.4137523 | 0.6791726 | 0.5528897 | 0.6980496 |
| P49312 | Hnnpa1     | 0.140555  | 0.6426749 | 0.833121  | 0.8943678 | -0.75895  | 0.5951527 | 0.2493813 | 0.6500471 |
| O88569 | Hnnpa2b1   | 0.2502957 | 0.2666864 | 0.3520707 | 0.8743196 | 0.0781728 | 0.3035476 | 0.7978701 | 0.7439428 |
| Q8BG05 | Hnnpa3     | 0.2396968 | 0.4163921 | 0.5690063 | 0.8753373 | 0.2265285 | 0.4031768 | 0.5788469 | 0.7021424 |
| Q99020 | Hnnpab     | -0.049895 | 0.2148159 | 0.8183841 | 0.8943678 | -0.253454 | 0.1574637 | 0.1231561 | 0.6209341 |
| Q9Z204 | Hnnpa      | 0.7962326 | 0.9157492 | 0.4133984 | 0.8743196 | 1.487493  | 1.0191333 | 0.1946987 | 0.6418859 |
| Q60668 | Hnnpd      | 0.2969978 | 0.6163895 | 0.6344766 | 0.8878094 | 0.8142963 | 0.5705493 | 0.1689453 | 0.6323131 |
| Q9Z2X1 | Hnnpf      | -0.354401 | 0.7221713 | 0.6258916 | 0.8827708 | -0.756495 | 0.8247308 | 0.3643696 | 0.6594641 |
| O35737 | Hnnpb1     | -0.495101 | 0.6794323 | 0.4898413 | 0.8743196 | -0.49075  | 0.6098368 | 0.4516794 | 0.6712964 |
| P61979 | Hnnpk      | -0.074473 | 0.2410106 | 0.7577965 | 0.8923639 | -0.201596 | 0.261247  | 0.4418541 | 0.6699704 |
| Q8R081 | Hnnpk      | -1.071653 | 1.1817042 | 0.3738787 | 0.8743196 | -0.015394 | 1.2595502 | 0.9903695 | 0.7779037 |
| F7C9U3 | Hnnpk      | -0.079058 | 1.0360949 | 0.9413121 | 0.9048359 | 0.1194627 | 0.9382396 | 0.9028421 | 0.7610813 |
| Q9D0E1 | Hnnpk      | -0.299886 | 0.4549657 | 0.5163515 | 0.8753373 | 0.3787822 | 0.326914  | 0.2602431 | 0.6500471 |
| Q8VEK3 | Hnnpk      | -0.463654 | 0.3098285 | 0.1385116 | 0.8743196 | -0.074787 | 0.2938924 | 0.7998889 | 0.7439428 |
| Q8VDM6 | Hnnpul1    | 1.3558768 | 0.7680816 | 0.1208674 | 0.8743196 | 0.4131897 | 1.0594006 | 0.7099895 | 0.7288099 |
| Q00PI9 | Hnnpul2    | 0.4891396 | 0.5994995 | 0.427317  | 0.8743196 | 0.3464555 | 0.6863272 | 0.62215   | 0.7103341 |
| Q9Z130 | Hnpdl      | 0.4740711 | 1.184654  | 0.7009572 | 0.8901989 | 0.0492173 | 1.5475634 | 0.9756606 | 0.776185  |
| Q9DCU9 | Hoga1      | 0.44149   | 0.3474122 | 0.216505  | 0.8743196 | -0.676724 | 0.6353536 | 0.2995148 | 0.6540599 |
| Q8R1H0 | Hopx       | -0.768176 | 0.4462483 | 0.0986021 | 0.8743196 | -0.450992 | 0.5832256 | 0.4484048 | 0.6701719 |
| Q62424 | Hoxa13     | 0.4805642 | 0.3914762 | 0.259284  | 0.8743196 | -0.22914  | 0.3184699 | 0.4988842 | 0.6823283 |
| P70321 | Hoxb13     | 0.3784478 | 0.9383086 | 0.6987411 | 0.8901989 | -1.003542 | 1.1384318 | 0.4119578 | 0.6675611 |
| P20615 | Hoxb9      | 0.0970712 | 0.666573  | 0.8883204 | 0.9006736 | -0.84567  | 1.6395871 | 0.6244542 | 0.7112387 |
| Q01822 | Hoxd1      | 0.1142515 | 0.8433619 | 0.8960525 | 0.901648  | -0.126917 | 0.3363127 | 0.7188808 | 0.7303836 |
| P70217 | Hoxd13     | 1.0370399 | 0.4153906 | 0.0412002 | 0.8743196 | 1.1219516 | 0.4647252 | 0.0522723 | 0.6209341 |
| Q61646 | Hp         | 0.2325219 | 0.3629049 | 0.5254491 | 0.8753373 | 0.356935  | 0.3623385 | 0.3315399 | 0.6594641 |
| Q3TEA8 | Hp1bp3     | 0.3636332 | 0.633715  | 0.5840526 | 0.8753373 | -0.456149 | 0.7862111 | 0.582905  | 0.7044237 |
| P49429 | Hpd        | -0.059688 | 0.1850481 | 0.7472954 | 0.8923639 | -0.177207 | 0.1856788 | 0.3409265 | 0.6594641 |
| Q8K248 | Hpd        | 1.881319  | 1.8048876 | 0.3319078 | 0.8743196 | 2.116276  | 1.9634357 | 0.3225183 | 0.6594641 |
| Q8VCC1 | Hpgd       | 0.3858905 | 0.5182103 | 0.4679844 | 0.8743196 | 0.3845021 | 0.4426458 | 0.4007939 | 0.6629633 |
| O35453 | Hpn        | -0.132386 | 0.5701274 | 0.8230219 | 0.8943678 | -1.625353 | 0.9324122 | 0.1319309 | 0.6209341 |
| P00493 | Hprt1      | -0.153705 | 0.2178698 | 0.4913175 | 0.8743196 | 0.0322357 | 0.1898874 | 0.8678107 | 0.7571111 |
| P59438 | Hps5       | -0.355564 | 0.8143303 | 0.6755287 | 0.8900083 | 0.6663569 | 0.5372936 | 0.2611963 | 0.6500471 |
| Q8BLY7 | Hps6       | 0.5780308 | 0.9474877 | 0.5610919 | 0.8753373 | 0.6613271 | 1.0726576 | 0.5601932 | 0.6986486 |
| Q6YGZ1 | Hpse       | 1.1419252 | 1.696827  | 0.522551  | 0.8753373 | 1.9140718 | 0.9430492 | 0.0887052 | 0.6209341 |
| Q91X72 | Hpx        | 0.3052439 | 0.226294  | 0.1793943 | 0.8743196 | 0.0675264 | 0.2229974 | 0.7625094 | 0.7387896 |
| Q9ESB3 | Hrg        | -0.066277 | 0.4443764 | 0.8819843 | 0.9006736 | 0.2670972 | 0.4423698 | 0.5488282 | 0.6980496 |
| P62816 | Hrk        | -0.137467 | 0.4912486 | 0.787695  | 0.8943678 | -0.555781 | 0.7003256 | 0.4576534 | 0.6712964 |
| P52760 | Hrsp12     | -0.74072  | 0.4692309 | 0.1188771 | 0.8743196 | -0.393955 | 0.306639  | 0.2036584 | 0.6429844 |
| P50172 | Hsd11b1    | -0.048947 | 0.6071194 | 0.935947  | 0.9048359 | -1.511737 | 0.6769589 | 0.0287865 | 0.6209341 |
| O08756 | Hsd17b10   | 0.0912872 | 0.4250532 | 0.8308785 | 0.8943678 | 0.5091079 | 0.3559019 | 0.160159  | 0.6243427 |
| Q9EQ06 | Hsd17b11   | -0.020126 | 0.5173209 | 0.9691645 | 0.9072902 | 0.4395359 | 0.3901987 | 0.2678669 | 0.6500471 |
| O70503 | Hsd17b12   | 0.3485479 | 0.355896  | 0.3334419 | 0.8743196 | 0.4845063 | 0.3126823 | 0.1305169 | 0.6209341 |
| Q8VCR2 | Hsd17b13   | -0.366871 | 0.2923436 | 0.2132032 | 0.8743196 | 0.0785937 | 0.2967812 | 0.7919374 | 0.7439428 |
| P51658 | Hsd17b2    | -0.446765 | 0.3743349 | 0.2512131 | 0.8743196 | 0.007365  | 0.3403185 | 0.9830625 | 0.7770843 |
| P51660 | Hsd17b4    | -0.11077  | 0.3498146 | 0.7519693 | 0.8923639 | 0.2102396 | 0.3374081 | 0.5343528 | 0.695758  |
| P50171 | Hsd17b8    | -0.048183 | 0.3481444 | 0.8905159 | 0.9006736 | 0.2358037 | 0.384941  | 0.543543  | 0.6979269 |
| P26150 | Hsd3b3     | 0.3196343 | 0.8512769 | 0.7125628 | 0.8910745 | 1.1243865 | 0.5813522 | 0.0751707 | 0.6209341 |

|        |          |           |           |           |           |           |           |           |           |
|--------|----------|-----------|-----------|-----------|-----------|-----------|-----------|-----------|-----------|
| Q61694 | Hsd3b5   | 0.5296595 | 0.900031  | 0.5619385 | 0.8753373 | 1.4401106 | 0.850723  | 0.1060127 | 0.6209341 |
| Q9EQC1 | Hsd3b7   | 0.1784159 | 0.6020392 | 0.7696203 | 0.8923639 | -0.959336 | 0.9845403 | 0.3414968 | 0.6594641 |
| Q2TPA8 | Hsd12    | 0.2559649 | 0.2972473 | 0.3911734 | 0.8743196 | 0.5928715 | 0.2879793 | 0.0424107 | 0.6209341 |
| P07901 | Hsp90aa1 | -0.150562 | 0.2089267 | 0.4721851 | 0.8743196 | -0.180697 | 0.1902487 | 0.3438652 | 0.6594641 |
| P11499 | Hsp90ab1 | 0.3249178 | 0.1396211 | 0.0207669 | 0.8743196 | -0.122426 | 0.1822165 | 0.5023828 | 0.6823283 |
| P08113 | Hsp90b1  | 0.230804  | 0.1820237 | 0.2062265 | 0.8743196 | 0.1243953 | 0.2194025 | 0.5714348 | 0.7006879 |
| Q8K0U4 | Hspa12a  | -0.025044 | 0.3818247 | 0.9495387 | 0.9060514 | 0.2709147 | 0.4992182 | 0.6069054 | 0.7082928 |
| Q9CZJ2 | Hspa12b  | 0.3655283 | 0.4567996 | 0.4498974 | 0.8743196 | -0.127803 | 0.5154316 | 0.8124379 | 0.7466053 |
| Q99M31 | Hspa14   | 1.4285713 | 0.9749006 | 0.1862472 | 0.8743196 | -0.729869 | 1.6175122 | 0.6676745 | 0.7215904 |
| Q61316 | Hspa4    | -0.143997 | 0.2120619 | 0.497822  | 0.8748057 | 0.1944004 | 0.2144539 | 0.365795  | 0.6594641 |
| P48722 | Hspa4l   | 0.0650802 | 0.3813054 | 0.8651039 | 0.8975219 | 0.3425291 | 0.3543735 | 0.3386007 | 0.6594641 |
| P20029 | Hspa5    | -0.046557 | 0.1297853 | 0.7200474 | 0.8910745 | 0.1279662 | 0.1150911 | 0.2671763 | 0.6500471 |
| P63017 | Hspa8    | 0.0240153 | 0.1852077 | 0.8969429 | 0.9017905 | 0.1783504 | 0.1847215 | 0.3354442 | 0.6594641 |
| P38647 | Hspa9    | 0.0587052 | 0.1585871 | 0.7114794 | 0.8910745 | -0.01783  | 0.1631067 | 0.9130252 | 0.7626807 |
| P14602 | Hspb1    | -0.181393 | 0.2514666 | 0.4720263 | 0.8743196 | 0.1364679 | 0.2311819 | 0.5561859 | 0.6980496 |
| Q99PR8 | Hspb2    | -0.211323 | 0.3185322 | 0.5102972 | 0.8753373 | -0.289524 | 0.4998287 | 0.5655924 | 0.6997388 |
| Q9QZ57 | Hspb3    | -0.738725 | 0.9476875 | 0.4478088 | 0.8743196 | 1.1159784 | 0.4718994 | 0.0342628 | 0.6209341 |
| Q5EBG6 | Hspb6    | -0.15249  | 0.3052716 | 0.619403  | 0.8818234 | -0.412497 | 0.3544183 | 0.2502295 | 0.6500471 |
| P35385 | Hspb7    | -0.15294  | 0.4487019 | 0.7350452 | 0.8923639 | 0.4091109 | 0.4934482 | 0.4128388 | 0.6675611 |
| Q9JK92 | Hspb8    | 0.6376405 | 0.3658356 | 0.0892194 | 0.8743196 | 0.2135247 | 0.5422902 | 0.696227  | 0.7264503 |
| P63038 | Hspd1    | -0.162764 | 0.1874775 | 0.3858772 | 0.8743196 | -0.035612 | 0.1663382 | 0.8306135 | 0.7517136 |
| Q64433 | Hspe1    | -0.035523 | 0.2391993 | 0.88221   | 0.9006736 | -0.069647 | 0.2241149 | 0.7566469 | 0.73805   |
| Q61699 | Hsph1    | -0.042498 | 0.4364551 | 0.9227419 | 0.9048359 | 0.4797852 | 0.418552  | 0.2566347 | 0.6500471 |
| P34968 | Htr2c    | -0.939625 | 1.944518  | 0.6436889 | 0.8893269 | 0.2946955 | 0.5210658 | 0.5921955 | 0.7054772 |
| P31387 | Htr5b    | -0.357531 | 0.4236848 | 0.4266406 | 0.8743196 | 0.2661357 | 0.4884699 | 0.6055098 | 0.7082928 |
| A2RT60 | Htra4    | 0.4078499 | 0.2066642 | 0.089032  | 0.8743196 | 0.1436036 | 0.2217994 | 0.5413068 | 0.6979269 |
| O88866 | Hunk     | -0.37165  | 0.5239098 | 0.5010286 | 0.8753373 | -0.481311 | 0.287623  | 0.1452729 | 0.6209341 |
| Q7TMY8 | Huwe1    | 0.3890675 | 0.5775888 | 0.5055532 | 0.8753373 | -0.418055 | 0.6124154 | 0.5006543 | 0.6823283 |
| Q80W93 | Hydin    | 0.1233121 | 0.6242695 | 0.8460645 | 0.8962775 | -0.603436 | 0.5635459 | 0.3037443 | 0.6540599 |
| Q9CXX0 | Hyls1    | -0.938959 | 0.9457155 | 0.353853  | 0.8743196 | -0.497516 | 0.2388195 | 0.082366  | 0.6209341 |
| Q9JKR6 | Hyou1    | 0.3418391 | 0.4006641 | 0.3952729 | 0.8743196 | 0.7120358 | 0.4093764 | 0.0849376 | 0.6209341 |
| Q9CR41 | Hypk     | 0.7527393 | 0.8605148 | 0.410714  | 0.8743196 | 0.8415502 | 0.6541545 | 0.2456853 | 0.6500471 |
| Q9DB29 | Iah1     | 0.0668512 | 0.3858853 | 0.862905  | 0.897347  | 0.0718179 | 0.3782297 | 0.8499614 | 0.7537615 |
| P03975 | Iap      | 1.229471  | 0.8264616 | 0.1804468 | 0.8743196 | 1.6184486 | 0.7046187 | 0.0613595 | 0.6209341 |
| P24822 | Iap      | -0.476495 | 0.3662101 | 0.2343945 | 0.8743196 | -1.405904 | 0.4269983 | 0.0165615 | 0.6209341 |
| P12968 | Iapp     | 2.2403758 | 0.813357  | 0.0283204 | 0.8743196 | 0.3882092 | 1.1119883 | 0.7389302 | 0.7346307 |
| Q8BU30 | Iars     | -0.937332 | 0.5232949 | 0.0810225 | 0.8743196 | -0.455358 | 0.2563539 | 0.0846359 | 0.6209341 |
| Q8BIJ6 | Iars2    | 0.2982308 | 0.3633818 | 0.4135709 | 0.8743196 | 0.3639049 | 0.3911984 | 0.3545607 | 0.6594641 |
| Q8CAK1 | Iba57    | 0.8763126 | 0.8737543 | 0.3236603 | 0.8743196 | 1.5519804 | 0.9201916 | 0.1032062 | 0.6209341 |
| Q9DBD0 | Ica      | -0.706627 | 0.6643491 | 0.2940346 | 0.8743196 | -0.010451 | 0.5366301 | 0.9845764 | 0.7770957 |
| P97411 | Ica1     | 1.2811902 | 0.8981961 | 0.1967914 | 0.8743196 | 1.212965  | 0.9431736 | 0.2458235 | 0.6500471 |
| Q9JKV2 | Ick      | 0.5120245 | 1.1899098 | 0.6799112 | 0.8900083 | 1.0850057 | 1.0084623 | 0.3233193 | 0.6594641 |
| P41133 | Id3      | -1.03409  | 0.8034172 | 0.2389776 | 0.8743196 | -0.62319  | 0.3365186 | 0.1134951 | 0.6209341 |
| Q9JHR7 | Ide      | 0.7394699 | 0.4200462 | 0.0881961 | 0.8743196 | 0.5582821 | 0.4913602 | 0.2658586 | 0.6500471 |
| O88844 | Idh1     | -0.204946 | 0.1980497 | 0.3016484 | 0.8743196 | -0.086877 | 0.1946146 | 0.655702  | 0.7198872 |
| P54071 | Idh2     | 0.0422014 | 0.1506251 | 0.7795568 | 0.8940257 | -0.084452 | 0.1557568 | 0.588188  | 0.7049451 |
| Q9D6R2 | Idh3a    | 0.033192  | 0.2140014 | 0.8768984 | 0.9006736 | -0.185346 | 0.2201323 | 0.4009578 | 0.6629633 |
| Q91VA7 | Idh3b    | -0.228368 | 0.2379307 | 0.3386086 | 0.8743196 | -0.036124 | 0.1750319 | 0.8367921 | 0.7519044 |
| P70404 | Idh3g    | 0.1094839 | 0.2232547 | 0.6247545 | 0.8826986 | -0.144033 | 0.2675944 | 0.5915534 | 0.7053615 |
| P58044 | Idi1     | -0.011942 | 0.4705851 | 0.9799162 | 0.907495  | 0.8293853 | 0.4069353 | 0.0514429 | 0.6209341 |
| Q8R0V5 | Ido2     | -0.044059 | 0.381645  | 0.9090951 | 0.9048359 | -0.22578  | 0.2517263 | 0.3804275 | 0.6603397 |
| P17950 | Ier2     | 0.1158316 | 0.7919895 | 0.8878437 | 0.9006736 | 0.4848274 | 0.6245106 | 0.4670437 | 0.6738937 |
| O89113 | Ier5     | -1.009097 | 1.4764475 | 0.5162915 | 0.8753373 | -0.358429 | 1.5161142 | 0.8209761 | 0.7484368 |
| Q9D8C4 | Ifi35    | -0.066411 | 0.3082461 | 0.835562  | 0.8943678 | -0.03458  | 0.1158332 | 0.7753686 | 0.7428116 |
| Q64345 | Ifit3    | -1.811527 | 1.4524184 | 0.2524156 | 0.8743196 | -0.149337 | 1.02207   | 0.888618  | 0.7592752 |
| Q9D4C1 | Ifttd1   | 1.1535691 | 0.8112173 | 0.1980105 | 0.8743196 | -0.140275 | 1.3833629 | 0.9225353 | 0.7632924 |
| P07351 | Ifna4    | -0.438196 | 0.6126749 | 0.4976289 | 0.8748057 | -0.971366 | 0.4882645 | 0.0937907 | 0.6209341 |
| Q6NWW3 | Ift122   | 0.2899231 | 0.3989598 | 0.4785995 | 0.8743196 | 0.4481357 | 0.430634  | 0.3170098 | 0.6594641 |
| Q9DB07 | Ift46    | 1.378836  | 1.5927952 | 0.4153518 | 0.8743196 | 1.7248475 | 1.6429799 | 0.3342311 | 0.6594641 |
| Q8BXG3 | Ift57    | -0.191893 | 0.1760961 | 0.3119283 | 0.8743196 | -0.189359 | 0.1127526 | 0.1440741 | 0.6209341 |
| Q61371 | Ift88    | 1.3611145 | 0.9561068 | 0.1975705 | 0.8743196 | 1.3396684 | 1.1065158 | 0.2715295 | 0.6500471 |

|        |         |           |           |           |           |           |           |           |           |
|--------|---------|-----------|-----------|-----------|-----------|-----------|-----------|-----------|-----------|
| Q61249 | Igbp1   | -0.279645 | 0.7348366 | 0.7088693 | 0.8910745 | 0.0411685 | 0.7546902 | 0.9573262 | 0.7721509 |
| Q60751 | Igf1r   | -0.222889 | 0.8520456 | 0.8011652 | 0.8943678 | 0.2103222 | 0.7227451 | 0.7808453 | 0.7434726 |
| Q5SF07 | Igf2bp2 | 0.140793  | 0.6264549 | 0.8285968 | 0.8943678 | 0.0202894 | 0.4945568 | 0.9686068 | 0.7751233 |
| Q07113 | Igf2r   | -0.227307 | 0.9735847 | 0.8220735 | 0.8943678 | -0.22432  | 0.8021006 | 0.7891248 | 0.7439428 |
| P47877 | Igfbp2  | -0.306121 | 0.644281  | 0.6491581 | 0.8900083 | -0.353969 | 0.295917  | 0.2767488 | 0.6500471 |
| P47878 | Igfbp3  | -1.013327 | 0.8557193 | 0.2749871 | 0.8743196 | 0.054091  | 0.6161633 | 0.9329027 | 0.7667191 |
| Q3KNY0 | Igfn1   | -1.546088 | 0.8791614 | 0.1220525 | 0.8743196 | -0.955534 | 1.2304517 | 0.4669122 | 0.6738937 |
| Q6ZQA6 | Igsf3   | 0.5123129 | 0.7257342 | 0.5030456 | 0.8753373 | 0.1999556 | 0.6808918 | 0.7789056 | 0.7430065 |
| Q9QZ85 | Iigp1   | 0.1904558 | 0.3284359 | 0.5643588 | 0.8753373 | -0.064938 | 0.3442866 | 0.8511897 | 0.7537615 |
| O88351 | Ikbkb   | -1.304652 | 1.115706  | 0.2805341 | 0.8743196 | -0.033719 | 0.4410522 | 0.9415454 | 0.7689243 |
| O08900 | Ikzf3   | -0.501548 | 1.3703063 | 0.7251676 | 0.8910745 | 0.2097423 | 0.8202107 | 0.8067098 | 0.745845  |
| Q8BU00 | Ikzf5   | -0.858441 | 1.3013846 | 0.5305826 | 0.8753373 | 1.2058271 | 0.9624395 | 0.2568627 | 0.6500471 |
| P97378 | Il12rb2 | 0.461605  | 0.3974741 | 0.2835669 | 0.8743196 | 0.2322331 | 0.4245077 | 0.6040697 | 0.7079483 |
| Q60819 | Il15ra  | -0.087755 | 0.2910191 | 0.7717617 | 0.8924353 | -0.6766   | 0.3421378 | 0.0953452 | 0.6209341 |
| Q60943 | Il17ra  | 1.5104743 | 1.7830901 | 0.4249452 | 0.8743196 | 0.7602473 | 2.0074856 | 0.7179445 | 0.7303836 |
| Q9JIP3 | Il17rb  | -1.312067 | 0.8104976 | 0.1495137 | 0.8743196 | -3.771319 | 1.9355632 | 0.0992742 | 0.6209341 |
| Q8JZL1 | Il17rd  | 0.0869696 | 0.5294023 | 0.8717048 | 0.8990856 | 0.0765232 | 0.5706724 | 0.8953828 | 0.7601149 |
| P13504 | Il1r1   | -1.026124 | 0.4792538 | 0.0695227 | 0.8743196 | 0.0810187 | 0.4189168 | 0.8530264 | 0.7541624 |
| P04351 | Il2     | 0.247696  | 1.3748511 | 0.86213   | 0.897347  | 1.011764  | 1.6765916 | 0.5682958 | 0.6997388 |
| P01590 | Il2ra   | -0.733364 | 0.5427554 | 0.2186757 | 0.8743196 | -0.391384 | 0.2309432 | 0.1410642 | 0.6209341 |
| P01586 | Il3     | -1.704693 | 1.0096128 | 0.1351761 | 0.8743196 | 0.7005138 | 0.2292599 | 0.0223523 | 0.6209341 |
| O09046 | Il4i1   | -1.13049  | 1.1060665 | 0.3407599 | 0.8743196 | -1.663101 | 1.1627435 | 0.2025703 | 0.6429844 |
| Q00560 | Il6st   | -0.578233 | 0.6082684 | 0.3734556 | 0.8743196 | -0.519868 | 0.2055789 | 0.0447522 | 0.6209341 |
| P15247 | Il9     | -0.4007   | 1.200968  | 0.7484172 | 0.8923639 | -0.299583 | 1.5231411 | 0.8505652 | 0.7537615 |
| Q9Z1X4 | Ilf3    | -0.129666 | 0.463419  | 0.7834502 | 0.8942061 | -0.218625 | 0.5899045 | 0.7168962 | 0.7303836 |
| Q9CQU8 | Immp11  | -1.23466  | 0.9569754 | 0.2379739 | 0.8743196 | 0.1117681 | 0.8367071 | 0.8981018 | 0.7608548 |
| Q8CAQ8 | Immt    | 0.2994019 | 0.2133118 | 0.1648003 | 0.8743196 | -0.266596 | 0.3322679 | 0.4254138 | 0.6694352 |
| O55023 | Impa1   | 0.1010658 | 0.4405413 | 0.8195435 | 0.8943678 | 0.6562707 | 0.4460471 | 0.1488433 | 0.6209341 |
| Q91UZ5 | Impa2   | -0.233559 | 0.3408634 | 0.5152608 | 0.8753373 | -0.856472 | 0.3514571 | 0.0506835 | 0.6209341 |
| P24547 | Impdh2  | -0.499396 | 0.6766819 | 0.4845105 | 0.8743196 | -0.095497 | 0.4856828 | 0.8506122 | 0.7537615 |
| Q04998 | Inhba   | 0.5618451 | 0.6834058 | 0.4194473 | 0.8743196 | 0.2980472 | 0.7392387 | 0.6910925 | 0.724834  |
| Q3TXT3 | Inip    | -0.349512 | 0.6136565 | 0.5867829 | 0.8753373 | -1.125244 | 0.7999424 | 0.2091546 | 0.6429844 |
| P40936 | Inmt    | 0.4485315 | 0.2939028 | 0.1309733 | 0.8743196 | 0.2573941 | 0.3153751 | 0.4172218 | 0.6692583 |
| Q66JY2 | Ino80d  | -0.515677 | 0.5240106 | 0.3578519 | 0.8743196 | -0.738784 | 0.3003522 | 0.0491377 | 0.6209341 |
| P49442 | Inpp1   | 0.2081742 | 1.3604311 | 0.8826995 | 0.9006736 | -0.228842 | 0.8094792 | 0.7869044 | 0.7439428 |
| Q6P1Y8 | Inpp4b  | -0.162537 | 0.2045583 | 0.4529534 | 0.8743196 | -0.269317 | 0.1271341 | 0.0784596 | 0.6209341 |
| O54997 | Inpp5b  | 0.5298637 | 0.624878  | 0.4097944 | 0.8743196 | 0.0853322 | 0.949052  | 0.9297268 | 0.7649924 |
| P59644 | Inpp5j  | -1.03505  | 1.0022759 | 0.3360984 | 0.8743196 | -0.621015 | 0.5441902 | 0.2972893 | 0.6540599 |
| O09107 | Insl3   | -0.216764 | 0.1888289 | 0.288706  | 0.8743196 | -0.012228 | 0.0673318 | 0.8618725 | 0.7561118 |
| P15208 | Insr    | -0.562589 | 0.7786544 | 0.4810918 | 0.8743196 | -0.450719 | 0.2347658 | 0.0770885 | 0.6209341 |
| Q9WTL4 | Insr    | -0.38578  | 1.0637643 | 0.7275649 | 0.891572  | -0.627665 | 0.9569796 | 0.5362256 | 0.695758  |
| Q6P4S8 | Ints1   | 1.1175231 | 0.5294015 | 0.0519756 | 0.8743196 | 0.7275348 | 0.6557101 | 0.2873018 | 0.6518981 |
| Q80UK8 | Ints2   | 1.9275159 | 1.9559335 | 0.357222  | 0.8743196 | 3.6069985 | 2.1289831 | 0.1411584 | 0.6209341 |
| Q8CHT3 | Ints5   | -0.334782 | 0.6768172 | 0.6359976 | 0.8883187 | -0.786552 | 0.7627864 | 0.3422293 | 0.6594641 |
| Q6PCM2 | Ints6   | 0.3443794 | 1.0844865 | 0.7600884 | 0.8923639 | -1.189603 | 0.9430221 | 0.2539609 | 0.6500471 |
| Q8K114 | Ints9   | -0.312814 | 0.3676143 | 0.4229582 | 0.8743196 | -1.477418 | 0.5792985 | 0.0434697 | 0.6209341 |
| O89019 | Invs    | 1.1614121 | 0.8650246 | 0.2212952 | 0.8743196 | -0.222276 | 1.3703927 | 0.8764739 | 0.7581843 |
| Q8K2V6 | Ipo11   | -0.039989 | 0.6484425 | 0.9525496 | 0.9060514 | 0.4195236 | 0.3903078 | 0.3237522 | 0.6594641 |
| Q8VI75 | Ipo4    | -1.227065 | 0.9656414 | 0.2444256 | 0.8743196 | 0.0288831 | 0.5023879 | 0.9560203 | 0.7720332 |
| Q8BKC5 | Ipo5    | -0.402583 | 0.3861375 | 0.3079737 | 0.8743196 | -0.32326  | 0.5239023 | 0.5441807 | 0.6979269 |
| Q9EPL8 | Ipo7    | 1.4793584 | 1.4544514 | 0.3429535 | 0.8743196 | 2.7167659 | 1.1412878 | 0.0547354 | 0.6209341 |
| Q91YE6 | Ipo9    | 0.421622  | 0.4283945 | 0.3578086 | 0.8743196 | -0.084912 | 0.6972233 | 0.9070453 | 0.7612577 |
| A6H690 | Iqca1p1 | 0.2134767 | 0.4403444 | 0.6426241 | 0.8891711 | 0.5348095 | 0.3888194 | 0.2181292 | 0.6434585 |
| Q6PCQ0 | Iqce    | -0.395218 | 0.5670068 | 0.5082673 | 0.8753373 | -1.465236 | 1.1640983 | 0.2549003 | 0.6500471 |
| Q9D2K4 | Iqch    | -0.488424 | 0.8243815 | 0.5721673 | 0.8753373 | -0.176175 | 0.5709352 | 0.7680801 | 0.7405059 |
| Q3UQ44 | Ilgap2  | -0.068985 | 0.2175537 | 0.7516612 | 0.8923639 | 0.0465859 | 0.2133128 | 0.8275008 | 0.7510933 |
| Q8R3Y8 | Irf2bp1 | -0.820328 | 1.3181224 | 0.5534383 | 0.8753373 | -0.559    | 0.3951412 | 0.2068995 | 0.6429844 |
| Q8K3X4 | Irf2bpl | 0.3008596 | 0.2545525 | 0.2758287 | 0.8743196 | 0.2050281 | 0.2729431 | 0.4809606 | 0.6794597 |
| P70671 | Irf3    | 0.2844651 | 0.9713286 | 0.7781187 | 0.8940257 | 1.2021717 | 0.9504359 | 0.252826  | 0.6500471 |
| P81122 | Irs2    | -0.411303 | 0.4674979 | 0.408156  | 0.8743196 | -0.114471 | 0.1178505 | 0.3689012 | 0.6594641 |
| Q9Z0Y7 | Irs4    | 0.4102293 | 0.9648756 | 0.6834824 | 0.8900083 | 1.0328996 | 1.1227582 | 0.3930743 | 0.6617584 |

|        |          |           |           |           |           |           |           |           |           |
|--------|----------|-----------|-----------|-----------|-----------|-----------|-----------|-----------|-----------|
| P81066 | Irx2     | -0.10283  | 1.1162639 | 0.9291837 | 0.9048359 | 0.9886152 | 1.085212  | 0.3974231 | 0.6617584 |
| Q9JKQ4 | Irx5     | -0.659466 | 0.7885168 | 0.4305861 | 0.8743196 | -0.62728  | 0.594435  | 0.3319359 | 0.6594641 |
| Q9ER75 | Irx6     | -0.43148  | 0.6042084 | 0.4982649 | 0.8748057 | -0.352188 | 0.3295799 | 0.3263467 | 0.6594641 |
| Q9D924 | Isca1    | 0.1203989 | 0.3135664 | 0.7124004 | 0.8910745 | -1.775615 | 0.710827  | 0.046657  | 0.6209341 |
| Q9DCB8 | Isca2    | -0.126963 | 0.2792437 | 0.6514404 | 0.8900083 | 0.2837001 | 0.2542962 | 0.2710776 | 0.6500471 |
| Q9D7P6 | Iscu     | 1.4854669 | 1.5198068 | 0.3438698 | 0.8743196 | -0.979436 | 2.5762253 | 0.7099489 | 0.7288099 |
| Q91V64 | Isoc1    | 0.3198344 | 0.3713294 | 0.3979514 | 0.8743196 | -0.121626 | 0.3349063 | 0.7202925 | 0.7303836 |
| P85094 | Isoc2a   | -0.320563 | 0.4225083 | 0.4505353 | 0.8743196 | -0.103186 | 0.3222771 | 0.7499091 | 0.7375672 |
| Q9CX00 | Ist1     | 0.1242864 | 2.0615755 | 0.9536121 | 0.9060514 | 1.1840907 | 2.2188454 | 0.6127637 | 0.7082928 |
| Q3V3R4 | Itga1    | -0.52302  | 0.6738448 | 0.463061  | 0.8743196 | -0.762119 | 0.5788338 | 0.2360116 | 0.6442378 |
| Q62469 | Itga2    | -0.893248 | 1.0207463 | 0.4105418 | 0.8743196 | -0.455241 | 0.4273116 | 0.3276951 | 0.6594641 |
| Q00651 | Itga4    | -0.269794 | 0.6396664 | 0.6858413 | 0.8900083 | -0.387725 | 0.8125824 | 0.6501373 | 0.7189488 |
| Q61739 | Itga6    | 0.3376608 | 0.541292  | 0.5525327 | 0.8753373 | 0.0517391 | 0.5883606 | 0.9327877 | 0.7667191 |
| A2ARA8 | Itga8    | -0.856079 | 0.5370838 | 0.1317991 | 0.8743196 | -0.334066 | 0.2132717 | 0.1412682 | 0.6209341 |
| P05555 | Itgam    | 0.1640175 | 0.7628769 | 0.835898  | 0.8943678 | -0.442945 | 1.1038879 | 0.7021297 | 0.7266885 |
| P09055 | Itgb1    | -1.567334 | 0.9561861 | 0.1451902 | 0.8743196 | -1.204959 | 1.1014345 | 0.3159221 | 0.6594641 |
| Q9R000 | Itgb1bp2 | -0.539136 | 0.6024479 | 0.4005591 | 0.8743196 | -0.044502 | 0.1730461 | 0.8056404 | 0.7456816 |
| Q9CQ82 | Itgb3bp  | 0.0731543 | 0.5277131 | 0.8936501 | 0.9006736 | -0.525122 | 0.4226087 | 0.2603835 | 0.6500471 |
| Q0VBD0 | Itgb8    | -0.321389 | 0.2550774 | 0.2480598 | 0.8743196 | -0.850805 | 0.4534796 | 0.109736  | 0.6209341 |
| Q61702 | Itih1    | 1.0700361 | 0.611256  | 0.0933525 | 0.8743196 | 0.181946  | 0.6775118 | 0.7910264 | 0.7439428 |
| Q61703 | Itih2    | 0.0899062 | 0.3245781 | 0.7828232 | 0.8940257 | -0.030114 | 0.2977334 | 0.9198583 | 0.7627031 |
| Q61704 | Itih3    | -1.176333 | 0.9442742 | 0.2319625 | 0.8743196 | -0.610153 | 0.7680061 | 0.4411886 | 0.6699704 |
| A6X935 | Itih4    | 0.8364194 | 0.7200279 | 0.2542446 | 0.8743196 | 0.6491078 | 0.7411272 | 0.3888434 | 0.6611124 |
| Q8BJD1 | Itih5    | -0.120747 | 0.8549871 | 0.8895704 | 0.9006736 | 0.5666057 | 0.6988195 | 0.4320721 | 0.6694352 |
| Q91VK4 | Itm2c    | 0.4667099 | 0.7521523 | 0.5545852 | 0.8753373 | 1.0261829 | 0.4766959 | 0.074827  | 0.6209341 |
| A2ASA8 | Itprpl1  | -0.292418 | 0.5526797 | 0.6130995 | 0.8794961 | -0.112134 | 0.2898753 | 0.7122264 | 0.730149  |
| Q9JHI5 | Ivd      | 0.2048236 | 0.2193188 | 0.3516383 | 0.8743196 | -0.049916 | 0.2465158 | 0.8398049 | 0.7524436 |
| Q920Q8 | Ivns1abp | 0.0284038 | 0.3247672 | 0.9314636 | 0.9048359 | -0.328162 | 0.606209  | 0.5974323 | 0.706009  |
| Q8C1D8 | Iws1     | -3.926116 | 4.7038584 | 0.4314697 | 0.8743196 | 3.6328364 | 3.4269702 | 0.3299085 | 0.6594641 |
| Q9QYE5 | Jag2     | 0.5576921 | 0.663004  | 0.4280545 | 0.8743196 | 0.7082902 | 0.3296693 | 0.0752633 | 0.6209341 |
| Q5XKN4 | Jagn1    | 0.4484674 | 0.6861658 | 0.5342519 | 0.8753373 | -0.678062 | 1.4977229 | 0.6666535 | 0.7215904 |
| Q62137 | Jak3     | 1.224646  | 1.0531922 | 0.2830162 | 0.8743196 | 1.5377784 | 1.0019788 | 0.1757475 | 0.6347112 |
| Q5DTX6 | Jcad     | -0.976911 | 0.5320311 | 0.1089518 | 0.8743196 | -0.282432 | 0.7233795 | 0.7097007 | 0.7288099 |
| Q3UWM4 | Jhdm1d   | -0.57645  | 0.7253629 | 0.4528819 | 0.8743196 | -0.540017 | 0.786105  | 0.5177685 | 0.6910975 |
| G3UZM1 | Jmjd1c   | 0.2003609 | 0.9172661 | 0.8333236 | 0.8943678 | 2.100496  | 0.7842967 | 0.0366244 | 0.6209341 |
| Q69ZK6 | Jmjd1c   | 0.9282351 | 0.9313276 | 0.3347275 | 0.8743196 | -0.612006 | 1.2075229 | 0.6207629 | 0.7091807 |
| Q3MI48 | Jsrp1    | 0.5290501 | 0.3069057 | 0.1284008 | 0.8743196 | 0.222534  | 0.7621876 | 0.7801436 | 0.7434254 |
| A2CG49 | Kalrn    | 0.2170774 | 1.6798138 | 0.9008127 | 0.9035427 | -0.906553 | 2.5391345 | 0.7332891 | 0.7329343 |
| Q80TG1 | Kansl1   | -0.13555  | 1.0255182 | 0.898563  | 0.9025216 | -1.556575 | 0.9587987 | 0.1556164 | 0.6211692 |
| A2RSY1 | Kansl3   | -0.290974 | 0.5143477 | 0.5892537 | 0.8753373 | -1.014741 | 0.6488061 | 0.1688476 | 0.6323131 |
| Q99MN1 | Kars     | -0.217188 | 0.2579222 | 0.4020592 | 0.8743196 | -0.285206 | 0.2528512 | 0.2628847 | 0.6500471 |
| Q8BZ21 | Kat6a    | -0.386999 | 1.22865   | 0.7619593 | 0.8923639 | 0.8387721 | 0.8757016 | 0.3751364 | 0.6594641 |
| Q69ZS8 | Katzn    | 0.8061579 | 0.6549377 | 0.2581132 | 0.8743196 | 0.9798228 | 0.8605702 | 0.2982909 | 0.6540599 |
| Q8C828 | Kbtbd13  | 1.8360487 | 4.3294298 | 0.6842317 | 0.8900083 | 4.4498514 | 3.2827198 | 0.2240468 | 0.6442378 |
| Q9D783 | Kbtbd5   | -0.691168 | 1.2407185 | 0.5948339 | 0.8770074 | 0.9181231 | 0.8961073 | 0.3450876 | 0.6594641 |
| Q80UY2 | Kcmf1    | 0.2033558 | 0.742437  | 0.7920653 | 0.8943678 | 0.9072442 | 0.7884193 | 0.2936363 | 0.6532982 |
| Q61423 | Kcna4    | -0.967878 | 0.9580858 | 0.3460271 | 0.8743196 | 0.3984563 | 0.927497  | 0.6824831 | 0.7239064 |
| Q61762 | Kcna5    | -2.842678 | 0.690967  | 0.004493  | 0.8743196 | -0.96486  | 0.9678343 | 0.3572913 | 0.6594641 |
| Q8C364 | Kcnc1    | 0.1846448 | 0.4872692 | 0.715966  | 0.8910745 | -0.185883 | 0.6197194 | 0.7743375 | 0.7428116 |
| Q63959 | Kcnc3    | 1.9632759 | 1.1493393 | 0.1313575 | 0.8743196 | 1.6605163 | 1.2221816 | 0.2231136 | 0.6442378 |
| Q9QZ26 | Kcne1l   | -0.565856 | 0.5584719 | 0.3446885 | 0.8743196 | -1.871641 | 0.6618023 | 0.0300328 | 0.6209341 |
| F7A6P6 | Kcng2    | -1.486157 | 2.0114308 | 0.4840266 | 0.8743196 | 1.2616641 | 0.7816615 | 0.1576371 | 0.6211692 |
| Q9WVJ0 | Kcnh3    | -0.754481 | 0.367669  | 0.0792884 | 0.8743196 | -2.617695 | 0.6873455 | 0.00888   | 0.6209341 |
| P59111 | Kcnh8    | -0.04852  | 0.8429413 | 0.9557077 | 0.9060514 | 0.8183375 | 0.7109486 | 0.2935079 | 0.6532982 |
| Q6VV64 | Kcnk18   | -0.646717 | 0.6578408 | 0.3583133 | 0.8743196 | -1.066525 | 1.3660186 | 0.4646265 | 0.6733118 |
| Q9Z2T1 | Kcnk7    | -0.150615 | 0.7658859 | 0.8496852 | 0.8962775 | 0.6280008 | 0.6616794 | 0.3792136 | 0.6601864 |
| Q08460 | Kcnma1   | 0.3337103 | 0.5850548 | 0.5768571 | 0.8753373 | 0.2354966 | 0.7236136 | 0.7500228 | 0.7375672 |
| P58391 | Kcnn3    | -0.598031 | 1.160454  | 0.6221844 | 0.8826986 | 0.258711  | 0.7447734 | 0.7401749 | 0.7346307 |
| O35173 | Kcns1    | -0.591018 | 0.7450349 | 0.4536616 | 0.8743196 | -0.608181 | 0.2726235 | 0.0671877 | 0.6209341 |
| Q6ZPR4 | Kcnt1    | 0.1326754 | 1.5331374 | 0.9334617 | 0.9048359 | -0.738307 | 1.3367648 | 0.6006894 | 0.7065519 |
| Q8BZN2 | Kcnv1    | 0.6422908 | 0.8426953 | 0.4708454 | 0.8743196 | -0.848993 | 1.0071165 | 0.4315476 | 0.6694352 |

|        |          |           |           |           |           |           |           |           |           |
|--------|----------|-----------|-----------|-----------|-----------|-----------|-----------|-----------|-----------|
| Q3U492 | Kcp      | 0.6187706 | 0.478735  | 0.2157364 | 0.8743196 | -0.554188 | 0.7371878 | 0.4655888 | 0.6736081 |
| E9Q6T9 | Kctd1    | 1.4239745 | 0.9641565 | 0.1832167 | 0.8743196 | 1.088165  | 1.1425808 | 0.3776804 | 0.6594641 |
| Q5M956 | Kctd1    | 1.0956709 | 0.6976365 | 0.1602804 | 0.8743196 | 2.3764614 | 0.3745722 | 0.0007182 | 0.5840626 |
| Q5DTY9 | Kctd16   | 0.0751654 | 0.3247821 | 0.8235976 | 0.8943678 | -0.927605 | 0.9032185 | 0.3440305 | 0.6594641 |
| Q8BNL5 | Kctd6    | -0.833109 | 1.0474723 | 0.4525297 | 0.8743196 | -2.175467 | 1.0730997 | 0.0889992 | 0.6209341 |
| Q8VCD7 | Kdm4c    | 0.980744  | 0.5910561 | 0.1410155 | 0.8743196 | -0.45731  | 0.6769874 | 0.5245189 | 0.69337   |
| Q3UXZ9 | Kdm5a    | 1.8491214 | 1.6862451 | 0.3091059 | 0.8743196 | 0.4658935 | 2.1632885 | 0.836618  | 0.7519044 |
| P41230 | Kdm5c    | 0.1114639 | 0.6206946 | 0.8598862 | 0.897347  | 0.264038  | 0.5417681 | 0.634116  | 0.7132198 |
| O70546 | Kdm6a    | 2.7692778 | 4.6451349 | 0.5698312 | 0.8753373 | -0.305598 | 3.8372126 | 0.939113  | 0.7681455 |
| Q5NCY0 | Kdm6b    | -0.801358 | 0.8266115 | 0.3646169 | 0.8743196 | -0.36209  | 0.3539327 | 0.3457498 | 0.6594641 |
| Q9DCY0 | Keg1     | 0.2621864 | 0.2645552 | 0.3267382 | 0.8743196 | 0.2322653 | 0.2925713 | 0.4318385 | 0.6694352 |
| Q9CWU5 | Khdc3    | 1.0229985 | 0.8638929 | 0.2749904 | 0.8743196 | 1.2171388 | 0.9709778 | 0.2566481 | 0.6500471 |
| Q9R226 | Khdrbs3  | -0.034228 | 1.1152308 | 0.9763725 | 0.9072902 | -0.691748 | 0.8201657 | 0.4313248 | 0.6694352 |
| P97328 | Khk      | -0.533064 | 0.3368622 | 0.1162033 | 0.8743196 | -0.095525 | 0.2311456 | 0.6802599 | 0.7239064 |
| Q3U0V1 | Khsrp    | -0.689939 | 0.7481856 | 0.3871299 | 0.8743196 | -0.725238 | 1.0113699 | 0.5002715 | 0.6823283 |
| Q8BKS9 | Kiaa0020 | -2.052156 | 1.2215946 | 0.1368671 | 0.8743196 | 0.0312169 | 0.1162301 | 0.7972501 | 0.7439428 |
| Q8C2E7 | Kiaa0196 | -0.466348 | 0.989138  | 0.6516471 | 0.8900083 | 0.5873468 | 1.1685673 | 0.6331419 | 0.7127208 |
| Q80U62 | Kiaa0226 | -0.739165 | 0.5201132 | 0.1757257 | 0.8743196 | 0.1660792 | 0.3845515 | 0.672907  | 0.7227095 |
| Q80U59 | Kiaa0232 | 2.9815757 | 1.9796477 | 0.1757606 | 0.8743196 | 2.6092041 | 2.3374348 | 0.3070062 | 0.6553142 |
| Q5SZV5 | Kiaa0319 | 0.6658188 | 1.1096571 | 0.5673996 | 0.8753373 | 0.3891823 | 1.2210704 | 0.7607404 | 0.7380771 |
| Q8JZY4 | Kiaa0391 | 1.3050928 | 1.5715658 | 0.4336956 | 0.8743196 | 1.064068  | 1.9844288 | 0.6111009 | 0.7082928 |
| Q7TPS5 | Kiaa0528 | 0.7890239 | 0.7602449 | 0.3338532 | 0.8743196 | 0.2058947 | 0.9642622 | 0.8379878 | 0.7519044 |
| Q6A000 | Kiaa0753 | -0.122363 | 0.6367898 | 0.8501968 | 0.8962775 | -1.143228 | 1.2991909 | 0.3948601 | 0.6617584 |
| Q3U3D7 | Kiaa0922 | 0.0923265 | 1.7593062 | 0.9596133 | 0.9067461 | 1.9139998 | 1.1832391 | 0.1568776 | 0.6211692 |
| Q6ZQ06 | Kiaa1009 | 0.0975542 | 1.0285332 | 0.9270937 | 0.9048359 | -0.120762 | 0.8302402 | 0.8891152 | 0.7592752 |
| A2AAE1 | Kiaa1109 | -1.113918 | 0.4704435 | 0.0317586 | 0.8743196 | -0.992582 | 0.5131852 | 0.0751611 | 0.6209341 |
| Q6P5U7 | Kiaa1239 | 1.0872287 | 1.0623515 | 0.3401708 | 0.8743196 | 1.8416327 | 1.0089586 | 0.1177556 | 0.6209341 |
| Q8BJS7 | Kiaa1383 | 1.9926586 | 1.1993688 | 0.140584  | 0.8743196 | 2.2951788 | 1.1329982 | 0.0891864 | 0.6209341 |
| Q6ZPR1 | Kiaa1430 | -0.908147 | 0.984503  | 0.3869873 | 0.8743196 | -0.918176 | 0.8536546 | 0.3234507 | 0.6594641 |
| Q69ZJ7 | Kiaa1432 | 0.6468408 | 0.636081  | 0.3430462 | 0.8743196 | -1.226928 | 0.9229801 | 0.2320539 | 0.6442378 |
| Q148V7 | Kiaa1468 | -0.193338 | 0.4020602 | 0.6452754 | 0.8896469 | -0.085717 | 0.3064634 | 0.7891014 | 0.7439428 |
| Q8K2Q9 | Kiaa1598 | -0.159676 | 1.0495707 | 0.8833727 | 0.9006736 | 0.9899633 | 1.2167837 | 0.4469561 | 0.6699704 |
| Q69ZC8 | Kiaa1704 | -0.963177 | 0.8539544 | 0.2965318 | 0.8743196 | -0.029695 | 0.7826916 | 0.9709662 | 0.7751875 |
| A2AJB1 | Kiaa1984 | -0.741134 | 0.7534927 | 0.3580806 | 0.8743196 | -0.360591 | 0.4634145 | 0.4660671 | 0.6736081 |
| Q6P9P6 | Kif11    | -0.270308 | 0.9426104 | 0.7825943 | 0.8940257 | 0.3817708 | 0.3412343 | 0.3060089 | 0.6553142 |
| Q9EQW7 | Kif13a   | -0.999473 | 1.1824095 | 0.4258974 | 0.8743196 | -0.285149 | 0.4682046 | 0.5648379 | 0.6997388 |
| E9Q4K7 | Kif13b   | 0.3093522 | 0.4859327 | 0.5306609 | 0.8753373 | 0.698134  | 0.5621057 | 0.2286051 | 0.6442378 |
| Q6P9L6 | Kif15    | -0.770688 | 1.2023074 | 0.5419267 | 0.8753373 | 0.3387761 | 0.3775966 | 0.4041776 | 0.6641888 |
| Q99PW8 | Kif17    | 1.3418734 | 0.5532496 | 0.0457256 | 0.8743196 | -1.533841 | 1.5129797 | 0.3498065 | 0.6594641 |
| Q91WD7 | Kif18a   | -0.295673 | 0.7536499 | 0.7064925 | 0.8910745 | -1.852228 | 2.2466911 | 0.4412327 | 0.6699704 |
| Q99PT9 | Kif19    | 0.1257715 | 0.2613604 | 0.6337405 | 0.8878094 | -0.485671 | 0.2867779 | 0.1018597 | 0.6209341 |
| Q60575 | Kif1b    | 0.7917882 | 0.7857566 | 0.3295896 | 0.8743196 | 0.1066502 | 1.0289087 | 0.9190262 | 0.7627031 |
| P97329 | Kif20a   | 0.8762615 | 0.8497941 | 0.3367774 | 0.8743196 | 0.9647639 | 0.9723969 | 0.3594346 | 0.6594641 |
| Q80WE4 | Kif20b   | 0.792496  | 0.9055912 | 0.3953085 | 0.8743196 | -0.943417 | 0.9124561 | 0.3200199 | 0.6594641 |
| Q9QXL1 | Kif21b   | -0.588117 | 1.0474309 | 0.5919804 | 0.876267  | -1.89868  | 1.95567   | 0.3691128 | 0.6594641 |
| Q52KG5 | Kif26a   | -3.052259 | 1.7365136 | 0.1222131 | 0.8743196 | -0.166028 | 0.1830574 | 0.3993792 | 0.6626324 |
| P28740 | Kif2a    | 0.3065767 | 0.7642391 | 0.7002709 | 0.8901989 | -0.71754  | 1.1867065 | 0.5675593 | 0.6997388 |
| Q61768 | Kif5b    | -0.415944 | 0.3027217 | 0.175011  | 0.8743196 | -0.236106 | 0.2918943 | 0.4225781 | 0.6694352 |
| P28738 | Kif5c    | -1.202686 | 0.6555326 | 0.1091951 | 0.8743196 | -1.540611 | 0.8490717 | 0.1195334 | 0.6209341 |
| O08672 | Kifc2    | 0.7231154 | 1.1057079 | 0.5340093 | 0.8753373 | -1.776116 | 2.0619528 | 0.4221149 | 0.6694352 |
| P05532 | Kit      | -0.58063  | 0.6382173 | 0.3931915 | 0.8743196 | -0.140021 | 0.7825277 | 0.8638788 | 0.7567341 |
| O35082 | Kl       | -1.728046 | 0.7581203 | 0.0566879 | 0.8743196 | -0.517872 | 0.7121571 | 0.4944947 | 0.6823283 |
| Q99N32 | Klb      | -0.801433 | 0.4647347 | 0.1282744 | 0.8743196 | 0.2325076 | 0.4756474 | 0.6423194 | 0.7161963 |
| Q9EPW2 | Klf15    | 0.8054402 | 0.7744026 | 0.332888  | 0.8743196 | 0.9635479 | 0.870929  | 0.3109514 | 0.6577795 |
| Q60980 | Klf3     | -0.245833 | 0.771229  | 0.7592133 | 0.8923639 | -2.007095 | 1.1905489 | 0.1427999 | 0.6209341 |
| Q92112 | Klhdc4   | -0.595123 | 0.4560765 | 0.2331919 | 0.8743196 | -0.60188  | 0.4739937 | 0.2511768 | 0.6500471 |
| Q8BFQ9 | Klhdc5   | 0.107976  | 0.3509998 | 0.7673193 | 0.8923639 | -0.504976 | 0.2568833 | 0.0969152 | 0.6209341 |
| Q91XA8 | Klhdc8a  | 0.0139908 | 0.2483556 | 0.9566501 | 0.9063776 | -0.205117 | 0.2835475 | 0.4966572 | 0.6823283 |
| Q8CE33 | Klhl11   | -0.051939 | 0.6898122 | 0.9420876 | 0.9050882 | -0.26031  | 0.6777816 | 0.7141752 | 0.7303836 |
| Q8BZM0 | Klhl12   | -0.024006 | 0.652869  | 0.9709853 | 0.9072902 | 1.1220839 | 0.6393524 | 0.0945616 | 0.6209341 |
| Q8VCK5 | Klhl20   | -0.611784 | 0.6757887 | 0.3954022 | 0.8743196 | 0.2065161 | 0.8155257 | 0.8085432 | 0.7459407 |

|        |           |           |           |           |           |           |           |           |           |
|--------|-----------|-----------|-----------|-----------|-----------|-----------|-----------|-----------|-----------|
| Q8BWA5 | Khl131    | 0.2996581 | 0.9409337 | 0.7594207 | 0.8923639 | -0.98404  | 0.9501017 | 0.3402596 | 0.6594641 |
| A2AI76 | Khl134    | 0.6344724 | 0.9611703 | 0.5303002 | 0.8753373 | 0.1118983 | 1.264105  | 0.9323442 | 0.7667191 |
| Q6V595 | Khl16     | -0.716043 | 0.7278071 | 0.357971  | 0.8743196 | -0.360778 | 1.0326541 | 0.7387467 | 0.7346307 |
| Q9JM71 | Klk1b27   | 0.3485684 | 1.0817265 | 0.7566861 | 0.8923639 | 0.6952721 | 0.7574928 | 0.3940914 | 0.6617584 |
| P26262 | Klkb1     | 0.1885096 | 0.3977305 | 0.6377206 | 0.8883187 | 0.2957778 | 0.4302932 | 0.4957093 | 0.6823283 |
| Q60653 | Klra6     | -0.191849 | 0.4611997 | 0.6898825 | 0.8900083 | 1.9406862 | 0.4169274 | 0.0034864 | 0.5840626 |
| Q3UM83 | Klrg2     | -0.493616 | 0.8245425 | 0.5682613 | 0.8753373 | -0.358353 | 0.9209027 | 0.7106139 | 0.7288708 |
| Q91WN4 | Kmo       | -0.147136 | 0.4498375 | 0.7457999 | 0.8923639 | 0.1190414 | 0.3960116 | 0.7660215 | 0.7397855 |
| O08677 | Kng1      | 0.0212689 | 0.2547122 | 0.9335929 | 0.9048359 | 0.0767989 | 0.2465203 | 0.7560201 | 0.7380125 |
| Q6S910 | Kng2      | 0.4834862 | 0.5437608 | 0.4034407 | 0.8743196 | -1.353564 | 0.3537228 | 0.0086933 | 0.6209341 |
| O35344 | Kpna3     | 2.2179428 | 1.3888298 | 0.1543    | 0.8743196 | 0.9230997 | 1.8310359 | 0.6321356 | 0.7120542 |
| O35343 | Kpna4     | 0.6381263 | 0.6323032 | 0.3288777 | 0.8743196 | -0.037538 | 0.5537134 | 0.9469822 | 0.7698559 |
| P70168 | Kpnb1     | -0.009419 | 0.2570365 | 0.9708593 | 0.9072902 | -0.024806 | 0.2771117 | 0.9289296 | 0.7645949 |
| B2RUR4 | Kprp      | 3.4783075 | 2.9253675 | 0.273199  | 0.8743196 | 3.4607893 | 3.3336964 | 0.3392267 | 0.6594641 |
| Q6S5J6 | Krit1     | 0.827778  | 4.2622928 | 0.8515277 | 0.8962775 | -0.995571 | 4.6047233 | 0.8359901 | 0.7519044 |
| Q8BGA5 | Krr1      | -0.651124 | 0.6150685 | 0.3249301 | 0.8743196 | -0.534838 | 0.441132  | 0.2709198 | 0.6500471 |
| P04104 | Krt1      | -0.459707 | 0.4059241 | 0.2690949 | 0.8743196 | -0.612172 | 0.6009049 | 0.3204877 | 0.6594641 |
| P02535 | Krt10     | -0.107316 | 0.4307417 | 0.8048933 | 0.8943678 | 0.3959088 | 0.4774753 | 0.4142782 | 0.6675611 |
| Q61414 | Krt15     | -0.520344 | 1.3051691 | 0.7020109 | 0.8907355 | 0.0423547 | 1.1059999 | 0.9706946 | 0.7751875 |
| P05784 | Krt18     | 0.1140244 | 0.1985753 | 0.5665966 | 0.8753373 | 0.1751779 | 0.1957419 | 0.3722903 | 0.6594641 |
| Q3TTY5 | Krt2      | 0.0413481 | 0.5257289 | 0.937992  | 0.9048359 | -0.894164 | 0.9533764 | 0.3594892 | 0.6594641 |
| Q9D312 | Krt20     | -0.853098 | 0.5865224 | 0.189132  | 0.8743196 | -1.746091 | 0.6546059 | 0.0371556 | 0.6209341 |
| Q99PS0 | Krt23     | 0.4805992 | 0.8307739 | 0.5810562 | 0.8753373 | 0.4599797 | 1.0419573 | 0.6743463 | 0.7236968 |
| A1L317 | Krt24     | -0.22476  | 0.4346113 | 0.6209841 | 0.8826986 | -0.132471 | 0.21581   | 0.5618613 | 0.6997388 |
| B1AQ75 | Krt36     | 0.4225256 | 0.6526803 | 0.5380359 | 0.8753373 | -0.664601 | 0.8373811 | 0.4576202 | 0.6712964 |
| Q922U2 | Krt5      | 0.7213195 | 0.735731  | 0.3424321 | 0.8743196 | -0.133579 | 0.7542301 | 0.8621541 | 0.7561118 |
| Q6IFZ9 | Krt74     | 1.1313315 | 0.5787503 | 0.0915204 | 0.8743196 | 1.560379  | 0.6109013 | 0.0432438 | 0.6209341 |
| Q3UV17 | Krt76     | -0.219845 | 0.3951635 | 0.5953076 | 0.8770074 | -0.6486   | 0.5785724 | 0.3051257 | 0.6553142 |
| Q8VED5 | Krt79     | 0.2602727 | 0.5264539 | 0.6245174 | 0.8826986 | 0.3776672 | 0.4103753 | 0.3655673 | 0.6594641 |
| P11679 | Krt8      | 0.3228593 | 0.217444  | 0.139181  | 0.8743196 | 0.3943401 | 0.2378014 | 0.0990636 | 0.6209341 |
| O08640 | Krtap14   | -0.41273  | 1.0365685 | 0.7023697 | 0.8907355 | 0.7860264 | 1.2809462 | 0.5619866 | 0.6997388 |
| Q3V2D6 | Krtap1-4  | -0.164933 | 0.3987013 | 0.691491  | 0.8900083 | -1.596443 | 1.4073173 | 0.2999107 | 0.6540599 |
| Q925H4 | Krtap16-7 | 0.3692224 | 0.5358427 | 0.501312  | 0.8753373 | -0.082383 | 0.7438842 | 0.9135082 | 0.7627031 |
| Q9D5Z7 | Krtap5-2  | 0.6555015 | 0.3777664 | 0.1262888 | 0.8743196 | 0.3957869 | 0.4602513 | 0.4228477 | 0.6694352 |
| Q9D226 | Krtap5-3  | 0.1722274 | 0.8842501 | 0.8511036 | 0.8962775 | -0.566969 | 1.181358  | 0.6482716 | 0.7181518 |
| Q2TA51 | Krtap5-5  | -1.242094 | 1.3213111 | 0.3784915 | 0.8743196 | -0.354906 | 0.4972928 | 0.5022309 | 0.6823283 |
| Q61097 | Ksr1      | 1.2992402 | 1.4341997 | 0.3951002 | 0.8743196 | 1.8920296 | 1.4970508 | 0.2531695 | 0.6500471 |
| Q9D1R2 | Kti12     | 0.4126738 | 1.0113681 | 0.6954396 | 0.8900083 | 0.4519611 | 1.2420606 | 0.728426  | 0.7323934 |
| Q61595 | Ktn1      | 2.3981558 | 1.0490633 | 0.0561378 | 0.8743196 | 1.4976096 | 1.0469207 | 0.2025249 | 0.6429844 |
| Q8C8H8 | Ky        | 0.5393116 | 0.8260219 | 0.5346666 | 0.8753373 | -0.492663 | 1.765773  | 0.7896069 | 0.7439428 |
| Q9CXF0 | Kynu      | -0.18735  | 0.3045117 | 0.540359  | 0.8753373 | -0.216707 | 0.3187048 | 0.4990596 | 0.6823283 |
| Q91YP0 | L2hgdh    | 0.2608219 | 2.1309737 | 0.9042105 | 0.9044744 | 1.5358136 | 1.7699559 | 0.4012856 | 0.6629633 |
| Q9CXA2 | L3hypdh   | 0.181906  | 0.3926096 | 0.6474856 | 0.8896469 | -0.123812 | 0.4854857 | 0.8013062 | 0.7439635 |
| Q8BLB7 | L3mbtl3   | -0.454049 | 1.0573468 | 0.67372   | 0.8900083 | 1.2256327 | 0.6393385 | 0.0774756 | 0.6209341 |
| B1B1A0 | L3mbtl4   | 0.1187009 | 0.4545096 | 0.8014842 | 0.8943678 | -0.600985 | 0.455323  | 0.2349864 | 0.6442378 |
| Q3V384 | Lace1     | 0.2794663 | 0.573195  | 0.6292927 | 0.8854638 | 0.0043521 | 0.6939202 | 0.995042  | 0.7793235 |
| Q99KR3 | Lactb2    | -0.233639 | 0.3181649 | 0.4651646 | 0.8743196 | 0.2637715 | 0.2568142 | 0.3083683 | 0.6563949 |
| Q61790 | Lag3      | -0.387621 | 1.2624789 | 0.7677517 | 0.8923639 | 0.0206004 | 1.1861551 | 0.9867066 | 0.7775007 |
| P19137 | Lama1     | 0.5662928 | 0.3262997 | 0.0925848 | 0.8743196 | 0.5639892 | 0.3635644 | 0.1324791 | 0.6209341 |
| Q60675 | Lama2     | 0.1905704 | 0.4705315 | 0.6911867 | 0.8900083 | 0.2837242 | 0.3299509 | 0.405424  | 0.6646266 |
| E9PUR4 | Lama3     | -0.425056 | 0.5536773 | 0.4677677 | 0.8743196 | 0.1244049 | 0.9101173 | 0.8957462 | 0.7602284 |
| Q61789 | Lama3     | 1.0955715 | 1.120619  | 0.3608179 | 0.8743196 | 0.5737652 | 1.3890967 | 0.6939258 | 0.7257828 |
| P97927 | Lama4     | 0.241516  | 0.7086105 | 0.7379582 | 0.8923639 | 1.1186676 | 0.358397  | 0.0081073 | 0.6209341 |
| Q61001 | Lama5     | 4.5801829 | 4.8291729 | 0.3744903 | 0.8743196 | -0.036198 | 4.8960156 | 0.9943407 | 0.7793235 |
| Q61292 | Lamb2     | -0.412807 | 0.7699591 | 0.6084679 | 0.8792876 | -1.594188 | 1.6198416 | 0.3630417 | 0.6594641 |
| P02468 | Lamc1     | 0.2585105 | 0.4007525 | 0.522023  | 0.8753373 | 0.2514758 | 0.4169025 | 0.5496978 | 0.6980496 |
| Q9R0B6 | Lamc3     | -0.339468 | 0.625088  | 0.5950583 | 0.8770074 | -0.223942 | 0.5710657 | 0.7013031 | 0.7266885 |
| P11438 | Lamp1     | -0.013518 | 0.5681307 | 0.9812228 | 0.907495  | 0.1132459 | 0.7928954 | 0.8878569 | 0.7592752 |
| P17047 | Lamp2     | -0.278891 | 0.5208728 | 0.6089341 | 0.8792876 | -0.036273 | 0.4589234 | 0.9395712 | 0.7681455 |
| O89112 | Lanc1     | -0.728902 | 1.1426035 | 0.5438148 | 0.8753373 | -0.382561 | 0.3242946 | 0.2827809 | 0.6508436 |
| Q8CD19 | Lanc13    | 1.2694329 | 1.0132614 | 0.2505    | 0.8743196 | 0.7958561 | 1.0890561 | 0.492454  | 0.6814973 |

|        |            |           |           |           |           |           |           |           |           |
|--------|------------|-----------|-----------|-----------|-----------|-----------|-----------|-----------|-----------|
| Q9CPY7 | Lap3       | 0.1621382 | 0.1918168 | 0.3989718 | 0.8743196 | 0.0228541 | 0.2191829 | 0.9170755 | 0.7627031 |
| Q9Z1M7 | Large      | -0.316024 | 0.4883584 | 0.5381913 | 0.8753373 | -0.152831 | 0.4895194 | 0.7654485 | 0.7395427 |
| Q6ZQ58 | Larp1      | 3.238576  | 1.2832442 | 0.0395934 | 0.8743196 | 2.6476255 | 1.4855427 | 0.1249848 | 0.6209341 |
| Q05CL8 | Larp7      | -0.277641 | 0.4615057 | 0.5664068 | 0.8753373 | -0.596096 | 0.8282209 | 0.4987546 | 0.6823283 |
| Q8BMJ2 | Lars       | 0.145708  | 0.3476127 | 0.6773935 | 0.8900083 | -0.41067  | 0.5240857 | 0.4387038 | 0.6699704 |
| Q8VDC0 | Lars2      | 0.5575233 | 0.3398811 | 0.1110424 | 0.8743196 | 0.3530722 | 0.3562008 | 0.3303803 | 0.6594641 |
| Q61792 | Lasp1      | -0.180036 | 0.3952472 | 0.6505411 | 0.8900083 | 0.2330377 | 0.428362  | 0.5889456 | 0.7049451 |
| O54957 | Lat        | -0.923064 | 0.556115  | 0.140906  | 0.8743196 | -0.535864 | 1.0010712 | 0.6116974 | 0.7082928 |
| Q7TSJ6 | Lats2      | -2.253876 | 1.1190803 | 0.0838641 | 0.8743196 | -0.019999 | 0.2286217 | 0.9331403 | 0.7667191 |
| Q9CX60 | Lbh        | -0.208591 | 0.3692177 | 0.5897426 | 0.8753373 | -0.456432 | 0.2213575 | 0.0848251 | 0.6209341 |
| P52955 | Lbx1       | -0.486253 | 0.3819119 | 0.2435936 | 0.8743196 | -0.148769 | 0.3136428 | 0.6520368 | 0.7193582 |
| Q9WUN8 | Lbx2       | 0.0507305 | 0.3520834 | 0.8894927 | 0.9006736 | -0.143901 | 0.2416719 | 0.5733075 | 0.7015295 |
| P16301 | Lcat       | -0.946073 | 1.1258742 | 0.4285045 | 0.8743196 | -0.826322 | 0.9559993 | 0.4206009 | 0.6694352 |
| Q61233 | Lcp1       | 0.0028987 | 0.4311396 | 0.9946476 | 0.9101811 | 0.4589547 | 0.4407045 | 0.3002734 | 0.6540599 |
| Q9JKS4 | Ldb3       | 0.0984089 | 0.2160397 | 0.6494309 | 0.8900083 | 0.1587533 | 0.22072   | 0.4733282 | 0.6774295 |
| P06151 | Ldha       | 0.0655494 | 0.1939673 | 0.7357954 | 0.8923639 | -0.03298  | 0.2226828 | 0.8824489 | 0.7585208 |
| Q8BVP2 | Ldhal6b    | 0.2564772 | 0.2941155 | 0.4121016 | 0.8743196 | -1.111971 | 0.6827148 | 0.1544892 | 0.6211692 |
| P16125 | Ldhb       | 0.1649394 | 0.1612099 | 0.3073145 | 0.8743196 | -0.08122  | 0.1765077 | 0.6459045 | 0.7175625 |
| Q7TNG8 | Ldhd       | 0.0500969 | 0.2238063 | 0.82322   | 0.8943678 | -0.340417 | 0.2709005 | 0.2113752 | 0.6429844 |
| P35951 | Ldlr       | 1.2820057 | 0.4725283 | 0.030065  | 0.8743196 | 1.1251064 | 0.4744239 | 0.0554055 | 0.6209341 |
| D3YYZ1 | Ldlrad1    | 0.6355543 | 0.9722041 | 0.5341665 | 0.8753373 | 1.5200734 | 0.7973355 | 0.1052258 | 0.6209341 |
| A2AR95 | Ldlrad3    | -0.329507 | 0.3561994 | 0.3857137 | 0.8743196 | -1.757991 | 0.5326229 | 0.016395  | 0.6209341 |
| Q3V1T4 | Lepre1     | 1.1393598 | 0.9646748 | 0.276139  | 0.8743196 | 0.1661742 | 2.0842817 | 0.9390468 | 0.7681455 |
| Q9Z210 | Letm1      | 0.0257557 | 0.4613958 | 0.9558425 | 0.9060514 | -0.578172 | 0.670019  | 0.395783  | 0.6617584 |
| P16045 | Lgals1     | -0.285995 | 0.347451  | 0.4135435 | 0.8743196 | -0.014227 | 0.3846132 | 0.9706266 | 0.7751875 |
| Q61357 | Lgals3     | -0.20524  | 0.314864  | 0.535315  | 0.8753373 | -2.17564  | 1.2404259 | 0.1299792 | 0.6209341 |
| Q07797 | Lgals3bp   | 1.5246338 | 0.7280696 | 0.0745201 | 0.8743196 | 2.1239026 | 0.5702512 | 0.0098001 | 0.6209341 |
| Q9JL15 | Lgals8     | -0.106416 | 0.7499993 | 0.8911659 | 0.9006736 | -0.23937  | 1.13715   | 0.8402441 | 0.7524932 |
| O08573 | Lgals9     | -0.664321 | 0.4069488 | 0.1092688 | 0.8743196 | -0.114695 | 0.2715268 | 0.674934  | 0.7239064 |
| O89017 | Lgmn       | 0.2645987 | 0.4716247 | 0.5779821 | 0.8753373 | 0.3577941 | 0.4493599 | 0.4314227 | 0.6694352 |
| Q9D715 | Lhpp       | 0.1442381 | 0.5899238 | 0.8081232 | 0.8943678 | 0.2143632 | 0.6404981 | 0.739921  | 0.7346307 |
| P53776 | Lhx4       | 1.1169017 | 0.7686433 | 0.1895125 | 0.8743196 | 1.6773484 | 0.8760416 | 0.1040292 | 0.6209341 |
| Q9WUH2 | Lhx9       | -0.672048 | 0.2667002 | 0.0398185 | 0.8743196 | -2.025112 | 1.1586675 | 0.1310899 | 0.6209341 |
| P42703 | Lifr       | -0.809014 | 0.6254972 | 0.2154392 | 0.8743196 | -0.911991 | 0.6178981 | 0.1637629 | 0.6273856 |
| P97386 | Lig3       | 0.4307969 | 0.7638918 | 0.5811227 | 0.8753373 | 1.2543383 | 0.5440925 | 0.038275  | 0.6209341 |
| Q9ERG0 | Lima1      | 0.7192473 | 0.2381302 | 0.0060913 | 0.8743196 | -0.418272 | 0.3140628 | 0.1979022 | 0.6429844 |
| Q3UH68 | Limch1     | 0.1040822 | 0.8382924 | 0.9028374 | 0.9042231 | 0.4722324 | 0.4658575 | 0.3292293 | 0.6594641 |
| Q9Z0M5 | Lipa       | -0.219695 | 0.842084  | 0.8016825 | 0.8943678 | -0.534331 | 0.6093943 | 0.4143069 | 0.6675611 |
| Q80Y17 | Ligl1      | -1.120342 | 0.5466886 | 0.0796098 | 0.8743196 | 0.1316423 | 0.527967  | 0.8114156 | 0.7465637 |
| Q9D0F3 | Lman1      | -0.192863 | 0.2517958 | 0.4462445 | 0.8743196 | -0.35182  | 0.276652  | 0.2082276 | 0.6429844 |
| Q9DBH5 | Lman2      | -0.290315 | 0.4285629 | 0.5084569 | 0.8753373 | -0.490046 | 0.2942103 | 0.119687  | 0.6209341 |
| Q3U3R4 | Lmf1       | -0.01874  | 0.9136402 | 0.984208  | 0.9078335 | -0.118781 | 0.952137  | 0.9047943 | 0.7612577 |
| P61969 | Lmo4       | -0.061274 | 0.7385788 | 0.9362046 | 0.9048359 | -0.149969 | 0.9770857 | 0.8830468 | 0.7585208 |
| Q3UHZ5 | Lmod2      | -0.175791 | 0.4221426 | 0.6829961 | 0.8900083 | -0.500775 | 0.7024394 | 0.4885023 | 0.6803412 |
| Q3TYD6 | Lmtk2      | -0.534209 | 0.384659  | 0.2074802 | 0.8743196 | -0.59922  | 0.1916952 | 0.0204309 | 0.6209341 |
| Q7TQ95 | Lnp        | -0.135596 | 0.6613694 | 0.8403102 | 0.895241  | -0.668975 | 0.7091515 | 0.3627067 | 0.6594641 |
| Q8C129 | Lnppep     | 0.7251224 | 0.7509349 | 0.3495426 | 0.8743196 | 1.7423993 | 0.5478727 | 0.0072369 | 0.6209341 |
| Q91XL2 | Lnx2       | 0.8903514 | 1.1351532 | 0.4585533 | 0.8743196 | 0.0078475 | 1.5005723 | 0.9959969 | 0.7793849 |
| Q78EE2 | LOC1008618 | -0.969128 | 0.5721592 | 0.1341304 | 0.8743196 | -0.694133 | 0.2485734 | 0.031475  | 0.6209341 |
| B6ZB74 | LOC1008622 | 0.7102564 | 0.5219294 | 0.2157552 | 0.8743196 | 0.3783576 | 0.8475713 | 0.670966  | 0.7227095 |
| Q8CGK3 | Lonp1      | 0.0902483 | 0.3244286 | 0.7811549 | 0.8940257 | 0.4115449 | 0.2805967 | 0.144199  | 0.6209341 |
| D3YY23 | Lonrf1     | 1.0840157 | 0.8584709 | 0.2471226 | 0.8743196 | -0.201739 | 1.1401035 | 0.8653712 | 0.7571111 |
| Q9D4H7 | Lonrf3     | 0.6617517 | 1.028001  | 0.5402618 | 0.8753373 | -0.481285 | 1.4914633 | 0.7578765 | 0.7380771 |
| P18165 | Lor        | 0.4032054 | 0.3360393 | 0.2692172 | 0.8743196 | 0.0209109 | 0.5116533 | 0.9687261 | 0.7751233 |
| P28301 | Lox        | 0.1820368 | 0.3915945 | 0.656145  | 0.8900083 | 0.0183341 | 0.7173562 | 0.9804388 | 0.7762605 |
| C8YR32 | Loxhd1     | -0.042264 | 0.6485527 | 0.9498636 | 0.9060514 | 0.685241  | 0.6880943 | 0.3577721 | 0.6594641 |
| Q3TFD2 | Lpcat1     | -1.092654 | 0.5497782 | 0.0872193 | 0.8743196 | -1.481968 | 0.8552996 | 0.1338566 | 0.6209341 |
| Q8BYI6 | Lpcat2     | 6.128951  | 3.6635075 | 0.1382494 | 0.8743196 | 6.2604398 | 4.1117097 | 0.1786896 | 0.637649  |
| Q91V01 | Lpcat3     | -0.435673 | 0.669673  | 0.5360819 | 0.8753373 | -0.718954 | 1.4143285 | 0.6293618 | 0.7120542 |
| Q91YX5 | Lpgat1     | -0.866677 | 0.4429773 | 0.0912918 | 0.8743196 | -0.099    | 0.3353902 | 0.7778047 | 0.7428116 |
| P11152 | Lpl        | -1.693333 | 0.5230266 | 0.0036366 | 0.8743196 | -1.32111  | 0.4201758 | 0.005106  | 0.6209341 |

|        |         |           |           |           |           |           |           |           |           |
|--------|---------|-----------|-----------|-----------|-----------|-----------|-----------|-----------|-----------|
| Q8BFW7 | Lpp     | -0.705196 | 0.9051649 | 0.4614539 | 0.8743196 | -0.059266 | 0.7456558 | 0.9392341 | 0.7681455 |
| Q7TPB0 | Lppr3   | -0.07276  | 0.5647352 | 0.9011085 | 0.9036268 | 0.3999459 | 0.4379409 | 0.396328  | 0.6617584 |
| Q7TME0 | Lppr4   | -0.283831 | 1.2328319 | 0.824499  | 0.8943678 | 1.2523973 | 0.8026175 | 0.1696873 | 0.6323131 |
| Q99N69 | Lpxn    | -0.527679 | 0.6587574 | 0.4494488 | 0.8743196 | -0.31956  | 0.1369577 | 0.0583785 | 0.6209341 |
| Q9ESE1 | Lrba    | 0.5240658 | 0.7016893 | 0.4794752 | 0.8743196 | 0.8975704 | 0.6372481 | 0.2086319 | 0.6429844 |
| Q8BXA0 | Lrfn5   | -0.208151 | 0.2636261 | 0.4556883 | 0.8743196 | -1.09552  | 1.029416  | 0.3281734 | 0.6594641 |
| Q91XL1 | Lrg1    | -0.520244 | 0.6921218 | 0.4638842 | 0.8743196 | -0.819598 | 0.3771489 | 0.0488451 | 0.6209341 |
| Q8CDD9 | Lrif1   | -0.311293 | 1.0319449 | 0.7716785 | 0.8924353 | 0.6705953 | 0.7519812 | 0.4068542 | 0.665102  |
| P70193 | Lrig1   | -0.234101 | 0.2767218 | 0.4255342 | 0.8743196 | -0.341074 | 0.2103313 | 0.1560151 | 0.6211692 |
| Q6PFC5 | Lrit2   | 0.6183725 | 1.2177134 | 0.6271894 | 0.8837507 | -1.037544 | 1.2657572 | 0.443721  | 0.6699704 |
| Q60664 | Lrmp    | -0.923824 | 1.166659  | 0.4544376 | 0.8743196 | 0.0676167 | 0.5467606 | 0.9056171 | 0.7612577 |
| Q91ZX7 | Lrp1    | 0.1275746 | 0.5412675 | 0.814902  | 0.8943678 | 0.1210437 | 0.5128421 | 0.8148291 | 0.7474231 |
| Q9J118 | Lrp1b   | -0.386088 | 0.8246013 | 0.6538622 | 0.8900083 | -0.876102 | 0.7766154 | 0.3023561 | 0.6540599 |
| A2ARV4 | Lrp2    | -0.47553  | 0.4375098 | 0.2942385 | 0.8743196 | -0.411447 | 0.4104901 | 0.3344769 | 0.6594641 |
| Q8VI56 | Lrp4    | -0.20994  | 0.2865504 | 0.4875756 | 0.8743196 | -0.332864 | 0.1585842 | 0.0805921 | 0.6209341 |
| Q91VN0 | Lrp5    | -1.974987 | 1.0649707 | 0.1060645 | 0.8743196 | 0.3488112 | 0.3626416 | 0.3732637 | 0.6594641 |
| O88572 | Lrp6    | 0.1190897 | 0.4730036 | 0.8084482 | 0.8943678 | 0.1517343 | 0.2650726 | 0.587825  | 0.7049451 |
| Q924X6 | Lrp8    | -0.503644 | 0.5628684 | 0.4006232 | 0.8743196 | -0.097917 | 0.1863325 | 0.6180834 | 0.7091807 |
| P55302 | Lrpap1  | -1.225752 | 1.3219575 | 0.3846649 | 0.8743196 | -0.149334 | 0.1391436 | 0.3244217 | 0.6594641 |
| Q6PB66 | Lrpprc  | 0.2757257 | 0.1870603 | 0.1423659 | 0.8743196 | 0.1527272 | 0.2321681 | 0.5116831 | 0.6874741 |
| Q6EDY6 | Lrrc16a | -0.607881 | 0.4703681 | 0.2090697 | 0.8743196 | -0.525428 | 0.4294922 | 0.2354091 | 0.6442378 |
| Q3UFQ8 | Lrrc16b | 0.2781561 | 0.6914498 | 0.6911925 | 0.8900083 | -0.127462 | 0.87394   | 0.8855019 | 0.7592393 |
| Q3TX51 | Lrrc28  | -0.479407 | 0.458502  | 0.3305054 | 0.8743196 | -1.077496 | 0.5813112 | 0.1132297 | 0.6209341 |
| Q3V0M2 | Lrrc36  | 0.023183  | 0.9077018 | 0.9803368 | 0.907495  | 1.2829501 | 0.6871097 | 0.1111114 | 0.6209341 |
| Q8K1C9 | Lrrc41  | -0.751681 | 0.7477503 | 0.3482504 | 0.8743196 | -0.669567 | 0.85592   | 0.4637958 | 0.6731374 |
| Q8CIM1 | Lrrc45  | -1.157531 | 0.9895361 | 0.2803759 | 0.8743196 | -1.30968  | 0.7677605 | 0.1389143 | 0.6209341 |
| Q922Q8 | Lrrc59  | -0.274669 | 0.761786  | 0.7234562 | 0.8910745 | -0.363733 | 0.9989108 | 0.7216151 | 0.7303836 |
| Q9D3W5 | Lrrc71  | -0.783383 | 1.5255518 | 0.6234021 | 0.8826986 | 0.2871305 | 0.9951945 | 0.7826591 | 0.7436402 |
| Q8CDN9 | Lrrc9   | 0.728923  | 0.4096597 | 0.1184095 | 0.8743196 | 0.2532013 | 0.4506718 | 0.5945803 | 0.7056501 |
| Q69ZB0 | Lrrcc1  | -1.491836 | 1.1256289 | 0.2266782 | 0.8743196 | -2.418842 | 1.7185098 | 0.2089102 | 0.6429844 |
| Q0P5X1 | Lrriq1  | 1.3101371 | 1.5905192 | 0.4372615 | 0.8743196 | 1.1766773 | 1.8214938 | 0.5421849 | 0.6979269 |
| Q14DL3 | Lrriq3  | 0.4182735 | 0.5598187 | 0.4793075 | 0.8743196 | 0.0692454 | 0.6841834 | 0.9226821 | 0.7632924 |
| Q8BZ81 | Lrrtm3  | 0.1498846 | 0.483821  | 0.7657369 | 0.8923639 | -0.361172 | 0.3335027 | 0.3204138 | 0.6594641 |
| Q80XG9 | Lrrtm4  | 2.5299717 | 1.1583855 | 0.0652494 | 0.8743196 | 1.8258415 | 1.324959  | 0.2173777 | 0.6434585 |
| Q80Z16 | Lrsam1  | -1.275327 | 0.4389194 | 0.0228029 | 0.8743196 | -1.409284 | 1.2573738 | 0.3052123 | 0.6553142 |
| Q8BUV6 | Lsm11   | -0.117515 | 0.2181937 | 0.6068688 | 0.8792876 | -0.616743 | 0.2431679 | 0.0443023 | 0.6209341 |
| P19973 | Lsp1    | -0.245148 | 0.8983685 | 0.792819  | 0.8943678 | -0.823081 | 1.549587  | 0.6143853 | 0.7084882 |
| O08843 | Lst1    | -0.517594 | 0.7158715 | 0.4931087 | 0.8748057 | -0.484882 | 0.5876144 | 0.4408404 | 0.6699704 |
| Q3U0Q5 | Lta     | -0.762849 | 0.8261225 | 0.3865173 | 0.8743196 | -0.524678 | 0.3056521 | 0.1368687 | 0.6209341 |
| P24527 | Lta4h   | 0.4683875 | 0.2725144 | 0.088258  | 0.8743196 | 0.0472799 | 0.3344425 | 0.8878518 | 0.7592752 |
| Q61810 | Ltbp3   | -0.311666 | 0.5898513 | 0.6135671 | 0.8794961 | -0.229369 | 0.3258409 | 0.5078608 | 0.6850074 |
| P08071 | Ltf     | -0.589308 | 0.5724865 | 0.3375492 | 0.8743196 | -1.506129 | 0.8669176 | 0.1329989 | 0.6209341 |
| P51885 | Lum     | -0.241528 | 0.5300302 | 0.6517908 | 0.8900083 | 0.4995812 | 0.6735405 | 0.464658  | 0.6733118 |
| Q8K2P1 | Lurap1l | -0.151405 | 0.7025647 | 0.8355197 | 0.8943678 | 0.6462025 | 0.4454989 | 0.1971047 | 0.6429844 |
| Q8R4U7 | Luzp1   | -0.352966 | 0.3006066 | 0.2586294 | 0.8743196 | -0.90274  | 0.2478351 | 0.0029797 | 0.5840626 |
| Q9WUC3 | Ly6h    | -0.827026 | 0.5257129 | 0.1596818 | 0.8743196 | -2.018825 | 1.6147795 | 0.2577698 | 0.6500471 |
| Q9JHF9 | Ly96    | -1.607634 | 1.300397  | 0.25623   | 0.8743196 | -0.069079 | 0.8215193 | 0.9357229 | 0.7669989 |
| P25911 | Lyn     | 0.1858104 | 1.0484612 | 0.864353  | 0.8974757 | -0.507463 | 1.2352363 | 0.6954715 | 0.7260377 |
| Q91YK8 | Lypd3   | 0.1484525 | 0.3982645 | 0.7203658 | 0.8910745 | -0.069215 | 0.4908877 | 0.8924856 | 0.7595603 |
| P97823 | Lypla1  | -0.406117 | 0.3402929 | 0.2378222 | 0.8743196 | 0.2279391 | 0.3056417 | 0.4594419 | 0.6712964 |
| Q9WTL7 | Lypla2  | -0.004361 | 0.3614468 | 0.9907097 | 0.909535  | -0.655548 | 0.5769609 | 0.2992048 | 0.6540599 |
| Q3UFF7 | Lypla1l | 1.302569  | 1.0439967 | 0.2522685 | 0.8743196 | 0.3816078 | 1.6034502 | 0.8198067 | 0.7482226 |
| Q9DA03 | Lymr7   | -0.216484 | 0.5822921 | 0.7152569 | 0.8910745 | 0.1036103 | 0.4263214 | 0.8117721 | 0.7465637 |
| Q3UN90 | Lymr9   | 0.1937788 | 0.4910465 | 0.696756  | 0.8900083 | 0.1788484 | 0.5186137 | 0.7338008 | 0.7331318 |
| Q9D925 | Lyzl4   | 0.9583393 | 0.5637111 | 0.1329185 | 0.8743196 | 0.2431651 | 0.7432198 | 0.7546467 | 0.7380125 |
| Q9DA11 | Lyzl6   | 1.9519025 | 1.3555207 | 0.1930605 | 0.8743196 | 1.3969615 | 1.6996249 | 0.4425493 | 0.6699704 |
| Q8K3C3 | Lzic    | 0.0421175 | 0.5192231 | 0.9364219 | 0.9048359 | 0.1279986 | 0.411986  | 0.760964  | 0.7380771 |
| P60853 | Lzts1   | 0.6397845 | 0.6883828 | 0.3673969 | 0.8743196 | -0.263341 | 0.9107255 | 0.7770226 | 0.7428116 |
| Q91YU6 | Lzts2   | -0.260035 | 0.2989913 | 0.4132864 | 0.8743196 | -0.642264 | 0.1825801 | 0.0125533 | 0.6209341 |
| P24668 | M6pr    | 0.391081  | 0.4561589 | 0.4001053 | 0.8743196 | 0.1099561 | 0.6110124 | 0.858997  | 0.7556239 |
| Q8BRC6 | Maats1  | 1.9432428 | 1.5887088 | 0.260845  | 0.8743196 | 2.5674534 | 1.6108617 | 0.1620813 | 0.6273856 |

|        |          |           |           |           |           |           |           |           |           |
|--------|----------|-----------|-----------|-----------|-----------|-----------|-----------|-----------|-----------|
| Q9QXZ0 | Macf1    | 2.0533266 | 0.7294177 | 0.0071037 | 0.8743196 | 1.2073781 | 0.8650432 | 0.1703051 | 0.6323131 |
| Q922B1 | MacroD1  | -0.070375 | 0.2988504 | 0.8145957 | 0.8943678 | 0.3422108 | 0.2440251 | 0.1664273 | 0.629443  |
| Q9DCX1 | Mad2l1bp | 1.0014382 | 0.5285484 | 0.0999829 | 0.8743196 | 0.064777  | 0.5341539 | 0.9074363 | 0.7612577 |
| Q80U28 | Madd     | 0.0099152 | 0.3010454 | 0.9746451 | 0.9072902 | -0.175654 | 0.2361205 | 0.4850288 | 0.6796099 |
| Q9D0U6 | Maf1     | -0.249722 | 1.1194874 | 0.8298518 | 0.8943678 | 0.8653174 | 1.0527228 | 0.4425193 | 0.6699704 |
| Q9CWV4 | Mageb16  | 1.7595142 | 1.74827   | 0.3477231 | 0.8743196 | 2.3063294 | 1.5734867 | 0.1930723 | 0.6418859 |
| Q8BQR7 | Mageb18  | 0.2672565 | 0.7264325 | 0.7238184 | 0.8910745 | -0.203773 | 0.7752388 | 0.8014577 | 0.7439635 |
| Q6RHR9 | Magi1    | -0.972327 | 1.3757798 | 0.5025648 | 0.8753373 | -2.28574  | 3.5846133 | 0.5472465 | 0.6980496 |
| Q9WVQ1 | Magi2    | 0.1068603 | 0.9904591 | 0.9171105 | 0.9048359 | -0.681401 | 1.3342529 | 0.6278025 | 0.7115945 |
| Q9EQJ9 | Magi3    | 1.172678  | 1.1675653 | 0.3486446 | 0.8743196 | 1.862952  | 1.0554698 | 0.1279986 | 0.6209341 |
| Q3TZ57 | Magix    | 0.0346129 | 0.5108028 | 0.9478702 | 0.9060514 | -0.132182 | 0.5907531 | 0.8303748 | 0.7517136 |
| Q8BI08 | Mal2     | 0.4739233 | 1.2149074 | 0.708068  | 0.8910745 | 1.6385068 | 1.2668097 | 0.2434292 | 0.6496933 |
| F6U238 | Maml2    | -1.915043 | 1.3672882 | 0.2040651 | 0.8743196 | -1.69313  | 0.9627976 | 0.1291536 | 0.6209341 |
| Q0ZCJ7 | Mamstr   | -0.84665  | 0.5712752 | 0.159033  | 0.8743196 | -0.670533 | 0.5884061 | 0.2750258 | 0.6500471 |
| P45700 | Man1a1   | -0.430499 | 1.3743068 | 0.7632196 | 0.8923639 | 2.1410189 | 0.9996123 | 0.0759562 | 0.6209341 |
| P27046 | Man2a1   | 1.0322328 | 0.6068745 | 0.1024451 | 0.8743196 | 0.5447236 | 0.5891805 | 0.3662243 | 0.6594641 |
| O09159 | Man2b1   | -0.038221 | 0.2077867 | 0.85567   | 0.8971541 | -0.326732 | 0.1589489 | 0.0531147 | 0.6209341 |
| O54782 | Man2b2   | -1.041532 | 1.3889137 | 0.4777624 | 0.8743196 | -0.159491 | 0.4534756 | 0.7370797 | 0.7345769 |
| Q8K214 | Manba    | -0.167208 | 0.5052798 | 0.7503891 | 0.8923639 | -0.06795  | 0.2358562 | 0.782963  | 0.7436402 |
| Q9CXI5 | Manf     | -0.211639 | 0.2359892 | 0.3839851 | 0.8743196 | -0.177502 | 0.2530401 | 0.495372  | 0.6823283 |
| Q8BW75 | Maob     | -0.21633  | 0.2769478 | 0.4370662 | 0.8743196 | -0.080778 | 0.3271149 | 0.8056864 | 0.7456816 |
| Q8C052 | Map1s    | 1.2995259 | 1.1913178 | 0.3114658 | 0.8743196 | 2.3784851 | 1.2628157 | 0.10863   | 0.6209341 |
| P31938 | Map2k1   | -2.151543 | 1.7552238 | 0.2599113 | 0.8743196 | -1.101399 | 0.3397745 | 0.0176523 | 0.6209341 |
| Q63932 | Map2k2   | -0.215503 | 0.4616728 | 0.6450441 | 0.8896469 | 0.1018249 | 0.6217829 | 0.8715615 | 0.7571111 |
| P47809 | Map2k4   | -0.11657  | 0.4512621 | 0.8035903 | 0.8943678 | 0.0322993 | 0.2192771 | 0.8877212 | 0.7592752 |
| Q9WVS7 | Map2k5   | 0.7559705 | 0.7545232 | 0.3497517 | 0.8743196 | 2.3957591 | 0.687419  | 0.0130603 | 0.6209341 |
| P53349 | Map3k1   | -0.024082 | 0.7099375 | 0.9732324 | 0.9072902 | 0.1681469 | 0.4829958 | 0.7313776 | 0.7326734 |
| Q60700 | Map3k12  | -0.08093  | 0.1640097 | 0.6367985 | 0.8883187 | -0.550005 | 0.4154346 | 0.2337294 | 0.6442378 |
| O08648 | Map3k4   | -0.881253 | 0.3800118 | 0.0296312 | 0.8743196 | -0.369645 | 0.2925412 | 0.2209166 | 0.6434585 |
| P27546 | Map4     | 0.1742974 | 0.2353846 | 0.4634442 | 0.8743196 | -0.460685 | 0.2651766 | 0.0913912 | 0.6209341 |
| P70218 | Map4k1   | -0.190571 | 0.5654405 | 0.7407628 | 0.8923639 | -0.364392 | 0.4559465 | 0.4385339 | 0.6699704 |
| O88735 | Map7     | -0.073186 | 0.5349904 | 0.8930094 | 0.9006736 | 0.5491072 | 0.5090969 | 0.300377  | 0.6540599 |
| A2AJI0 | Map7d1   | -0.754179 | 0.9609896 | 0.4583063 | 0.8743196 | -0.135936 | 0.836854  | 0.8762941 | 0.7581843 |
| A2AG50 | Map7d2   | 1.303899  | 1.781917  | 0.4880956 | 0.8743196 | 0.734441  | 2.0114303 | 0.7275372 | 0.7323934 |
| P47811 | Mapk14   | -0.610598 | 1.676088  | 0.7263902 | 0.8910745 | 1.0480782 | 0.6942946 | 0.1818951 | 0.6395902 |
| Q6P5G0 | Mapk4    | -0.317865 | 0.6830088 | 0.6557843 | 0.8900083 | -1.43131  | 0.8426278 | 0.1403054 | 0.6209341 |
| Q61532 | Mapk6    | -0.327314 | 1.1659767 | 0.78704   | 0.8943678 | 1.0387224 | 0.6681318 | 0.1710224 | 0.6323131 |
| Q9WVS8 | Mapk7    | -0.813241 | 0.6542464 | 0.2538786 | 0.8743196 | -0.423895 | 0.1603234 | 0.0383347 | 0.6209341 |
| Q9WVI9 | Mapk8ip1 | -1.275853 | 1.1939    | 0.3206909 | 0.8743196 | -0.649201 | 1.4709989 | 0.6744312 | 0.7236968 |
| Q6NS57 | Mapkbp1  | -0.649427 | 0.8395964 | 0.4645421 | 0.8743196 | -0.507809 | 0.4310406 | 0.2833606 | 0.6508436 |
| Q8R001 | Mapre2   | -0.19392  | 0.251311  | 0.4655783 | 0.8743196 | -0.108482 | 0.1114083 | 0.3677928 | 0.6594641 |
| P10637 | Mapt     | -0.313603 | 0.3787384 | 0.4206383 | 0.8743196 | -0.81851  | 0.4031097 | 0.0632813 | 0.6209341 |
| P26645 | Marcks   | -0.331402 | 0.4424174 | 0.4782257 | 0.8743196 | -0.441071 | 0.4130039 | 0.3266125 | 0.6594641 |
| P28667 | Marcks1  | 0.6008315 | 1.1086358 | 0.6046633 | 0.8792876 | -1.419205 | 2.0907945 | 0.5225783 | 0.6929797 |
| Q68FL6 | Mars     | -0.353768 | 0.3227868 | 0.2772588 | 0.8743196 | -0.463681 | 0.2987257 | 0.1263512 | 0.6209341 |
| Q499X9 | Mars2    | 0.4625909 | 0.7162614 | 0.5389694 | 0.8753373 | 0.6405835 | 0.5572765 | 0.2941025 | 0.6533413 |
| Q9R1L5 | Mast1    | 0.0254384 | 0.2713746 | 0.9279431 | 0.9048359 | -0.529349 | 0.9160821 | 0.5843899 | 0.7048643 |
| Q3U214 | Mast3    | -0.346607 | 0.5135598 | 0.5213927 | 0.8753373 | -0.374538 | 0.2619506 | 0.2027125 | 0.6429844 |
| Q811L6 | Mast4    | -0.574666 | 0.4606853 | 0.2247976 | 0.8743196 | -0.431925 | 0.3851468 | 0.2753785 | 0.6500471 |
| Q91X83 | Mat1a    | 0.0434943 | 0.2101316 | 0.8362996 | 0.8943678 | 0.4049891 | 0.1623652 | 0.0138551 | 0.6209341 |
| Q3THS6 | Mat2a    | 0.0331003 | 0.3511544 | 0.9253023 | 0.9048359 | -0.244987 | 0.3858446 | 0.528997  | 0.6933955 |
| Q99LB6 | Mat2b    | 0.2269473 | 0.6198917 | 0.7250989 | 0.8910745 | 0.0224499 | 0.7930831 | 0.9783353 | 0.7762206 |
| Q8K310 | Matr3    | -0.955154 | 0.9033381 | 0.3254656 | 0.8743196 | 0.2696486 | 0.6500848 | 0.6927183 | 0.7253631 |
| Q8VCF0 | Mavs     | 0.7575146 | 0.3972781 | 0.0658568 | 0.8743196 | -1.241191 | 0.6304619 | 0.0593318 | 0.6209341 |
| P04247 | Mb       | 0.3686056 | 0.2174562 | 0.0916244 | 0.8743196 | 0.2763879 | 0.202929  | 0.1749608 | 0.6347112 |
| P39039 | Mbl1     | 1.20614   | 2.1521497 | 0.5926585 | 0.8766805 | 1.8789048 | 2.140316  | 0.4137848 | 0.6675611 |
| P41317 | Mbl2     | -0.683187 | 1.1055236 | 0.556155  | 0.8753373 | -1.540343 | 1.9793018 | 0.4660075 | 0.6736081 |
| Q8R3I2 | Mboat2   | 0.7663013 | 1.0415245 | 0.4857998 | 0.8743196 | -1.27951  | 1.092648  | 0.2859882 | 0.6518056 |
| Q8CHK3 | Mboat7   | 1.0395819 | 0.9790928 | 0.3235884 | 0.8743196 | -1.777441 | 1.501937  | 0.2813965 | 0.6506857 |
| Q9CW89 | Mbtps1   | 0.0244878 | 0.6805991 | 0.972303  | 0.9072902 | -0.201764 | 0.5127239 | 0.7075428 | 0.7282849 |
| Q9WTZ2 | Mbtps1   | 0.3224479 | 0.862389  | 0.7195459 | 0.8910745 | 0.9950438 | 0.7382115 | 0.2263491 | 0.6442378 |

|        |         |           |           |           |           |           |           |           |           |
|--------|---------|-----------|-----------|-----------|-----------|-----------|-----------|-----------|-----------|
| P33033 | Mc3r    | 0.0623528 | 0.7001663 | 0.9315332 | 0.9048359 | -1.265733 | 0.7356776 | 0.1361305 | 0.6209341 |
| Q8R3F5 | Mcat    | -1.964716 | 1.9879421 | 0.3386729 | 0.8743196 | -0.142337 | 0.7942641 | 0.8605387 | 0.7561118 |
| Q99MR8 | Mccc1   | 0.0610659 | 0.1790519 | 0.7334937 | 0.8923639 | 0.1074984 | 0.179178  | 0.5494674 | 0.6980496 |
| Q3ULD5 | Mccc2   | -0.168224 | 0.3537934 | 0.6350932 | 0.8883187 | -0.419347 | 0.3730857 | 0.2629525 | 0.6500471 |
| Q9D115 | Mcee    | 0.0370972 | 0.4717396 | 0.937825  | 0.9048359 | -0.005234 | 0.5579044 | 0.9925836 | 0.7789098 |
| Q9D8U6 | Mcemp1  | 0.6359107 | 0.9244572 | 0.5136724 | 0.8753373 | -0.634504 | 0.8993302 | 0.5069346 | 0.6840033 |
| Q64096 | Mcf2l   | 0.1618461 | 0.5682164 | 0.7796679 | 0.8940257 | 0.0679204 | 0.5487747 | 0.9033927 | 0.7610813 |
| Q8K5B2 | Mcfd2   | 0.0436584 | 0.484816  | 0.9294377 | 0.9048359 | -0.991296 | 0.8706817 | 0.2754467 | 0.6500471 |
| Q0VBD2 | Mcm10   | 0.177822  | 1.2195971 | 0.8881861 | 0.9006736 | 1.7319949 | 1.0688607 | 0.1562708 | 0.6211692 |
| Q9WUU9 | Mcm3ap  | -0.502809 | 0.6845692 | 0.4865202 | 0.8743196 | -0.360669 | 0.2864165 | 0.254712  | 0.6500471 |
| P49717 | Mcm4    | -1.000701 | 0.534588  | 0.1033873 | 0.8743196 | -1.154444 | 0.714176  | 0.15712   | 0.6211692 |
| P49718 | Mcm5    | -0.04695  | 0.1445795 | 0.7548723 | 0.8923639 | -0.264874 | 0.1423305 | 0.112072  | 0.6209341 |
| Q9CWW1 | Mcm8    | 0.0741842 | 0.2414613 | 0.7676069 | 0.8923639 | 0.0981743 | 0.3487436 | 0.7877771 | 0.7439428 |
| Q99J21 | Mcoln1  | -0.784793 | 0.7544005 | 0.3327983 | 0.8743196 | 0.0973391 | 0.4564038 | 0.8381752 | 0.7519044 |
| Q5PSV9 | Mdc1    | -0.380592 | 0.4643555 | 0.4186934 | 0.8743196 | -0.471075 | 0.5578704 | 0.4058569 | 0.6646266 |
| P60755 | Mdga2   | -0.345417 | 0.4086123 | 0.4112017 | 0.8743196 | -0.504156 | 0.4919534 | 0.3241475 | 0.6594641 |
| P14152 | Mdh1    | -0.16306  | 0.2159405 | 0.4509759 | 0.8743196 | -0.244552 | 0.2242131 | 0.2767455 | 0.6500471 |
| P08249 | Mdh2    | 0.2468453 | 0.1731519 | 0.1552464 | 0.8743196 | 0.1922667 | 0.163798  | 0.2417664 | 0.6494004 |
| Q9D067 | Mdm1    | -1.73262  | 1.7432451 | 0.3360328 | 0.8743196 | -2.870603 | 2.2615262 | 0.2265807 | 0.6442378 |
| Q9D967 | Mdp1    | -0.021083 | 0.2289124 | 0.92721   | 0.9048359 | -0.970377 | 0.3543164 | 0.0107881 | 0.6209341 |
| P06801 | Me1     | -0.2141   | 0.3247492 | 0.5105463 | 0.8753373 | -0.25446  | 0.3268356 | 0.4373901 | 0.6699704 |
| Q8BMF3 | Me3     | -0.064947 | 0.3418751 | 0.8500294 | 0.8962775 | 0.2994863 | 0.3146525 | 0.3459666 | 0.6594641 |
| Q9DCS3 | Mecr    | -0.162728 | 0.3029784 | 0.5937371 | 0.876962  | -0.121054 | 0.3613892 | 0.7393567 | 0.7346307 |
| Q925J9 | Med1    | 0.2754285 | 0.2802487 | 0.3412933 | 0.8743196 | -0.24991  | 0.7089467 | 0.7301065 | 0.7324769 |
| Q8BQM9 | Med12l  | -1.014222 | 1.2240219 | 0.4346711 | 0.8743196 | 0.3069723 | 0.5161071 | 0.5737178 | 0.7015295 |
| Q5SWW4 | Med13   | -0.355517 | 0.8697214 | 0.6949237 | 0.8900083 | -0.450907 | 1.1061284 | 0.6976812 | 0.7265263 |
| Q9CQ39 | Med21   | 1.0562479 | 0.8123029 | 0.2346665 | 0.8743196 | 1.2272767 | 0.2138522 | 0.0012166 | 0.5840626 |
| Q99K74 | Med24   | -0.55486  | 0.7209479 | 0.4666937 | 0.8743196 | -1.759502 | 0.9395676 | 0.1102697 | 0.6209341 |
| Q9DB40 | Med27   | -0.894064 | 0.6767279 | 0.2279955 | 0.8743196 | -0.566302 | 0.6751621 | 0.4337397 | 0.6697843 |
| Q80T91 | Megf11  | -1.032726 | 0.8244845 | 0.2505848 | 0.8743196 | -0.091904 | 0.1435292 | 0.5456295 | 0.6979269 |
| Q8BH27 | Megf9   | -0.044164 | 1.2517275 | 0.9728393 | 0.9072902 | 0.1537534 | 0.9860483 | 0.881203  | 0.7585208 |
| Q9D4I2 | Mei1    | -0.236411 | 0.8761085 | 0.7950636 | 0.8943678 | -0.016416 | 0.78323   | 0.9839573 | 0.7770843 |
| Q8BRM6 | Mei4    | 0.5778323 | 0.573141  | 0.3469374 | 0.8743196 | -1.103688 | 0.5545776 | 0.0936977 | 0.6209341 |
| Q9D513 | Meiob   | -1.645568 | 0.6738576 | 0.044627  | 0.8743196 | -0.258268 | 0.6767001 | 0.7158659 | 0.7303836 |
| P97368 | Meis3   | -0.321881 | 0.7601679 | 0.6846855 | 0.8900083 | 0.4596667 | 0.7885856 | 0.5811908 | 0.7031064 |
| Q91VH6 | Memo1   | -0.099614 | 0.1956499 | 0.6180588 | 0.8816934 | -0.665227 | 0.4185028 | 0.1359531 | 0.6209341 |
| O88559 | Men1    | 0.172507  | 1.4091816 | 0.9060096 | 0.9048359 | 2.0886003 | 0.9939102 | 0.0803224 | 0.6209341 |
| P32443 | Meox2   | -2.848355 | 2.0639071 | 0.2100267 | 0.8743196 | -0.577737 | 0.488832  | 0.28197   | 0.6508436 |
| O08574 | Mesp2   | -0.977635 | 0.9847111 | 0.3538716 | 0.8743196 | 0.056202  | 0.2062419 | 0.7943691 | 0.7439428 |
| Q8BP48 | Metap1  | 0.567665  | 0.9247597 | 0.5587263 | 0.8753373 | -0.064454 | 1.1481454 | 0.9570553 | 0.7721509 |
| Q9Z120 | Mettl1  | -0.40346  | 0.5355756 | 0.4758259 | 0.8743196 | -0.600856 | 0.3235141 | 0.1126478 | 0.6209341 |
| Q91YR5 | Mettl13 | -0.114644 | 0.4841971 | 0.8196133 | 0.8943678 | -0.944121 | 1.1814942 | 0.4546986 | 0.6712964 |
| Q9DD20 | Mettl7b | -0.457823 | 0.5554719 | 0.4120763 | 0.8743196 | -0.222521 | 0.497803  | 0.6561418 | 0.7198872 |
| Q3UE17 | Mex3d   | 0.3459105 | 0.4290773 | 0.4466617 | 0.8743196 | -0.802465 | 0.4451394 | 0.1214926 | 0.6209341 |
| Q9R0R1 | Mfi2    | -1.066458 | 0.4608695 | 0.0352556 | 0.8743196 | -0.710079 | 0.5518102 | 0.2206002 | 0.6434585 |
| Q811U4 | Mfn1    | 0.7424203 | 0.6645696 | 0.3008039 | 0.8743196 | -0.220827 | 0.8043351 | 0.7928731 | 0.7439428 |
| Q9D2V8 | Mfsd10  | 1.1763786 | 1.2017532 | 0.3602476 | 0.8743196 | 1.5658731 | 1.4915376 | 0.3342271 | 0.6594641 |
| Q9DA75 | Mfsd2a  | 0.7037847 | 0.4073551 | 0.1276784 | 0.8743196 | 0.3376342 | 0.3703748 | 0.3971248 | 0.6617584 |
| Q8VI64 | Mgarp   | -1.189299 | 0.6780679 | 0.1228823 | 0.8743196 | -0.122234 | 0.4587153 | 0.7987982 | 0.7439428 |
| Q10470 | Mgat3   | -0.148006 | 0.2778886 | 0.6107859 | 0.8792876 | -0.102269 | 0.1296314 | 0.4601849 | 0.6712964 |
| Q812G0 | Mgat4a  | -0.062419 | 0.8136252 | 0.9409956 | 0.9048359 | -0.85799  | 1.0919521 | 0.4619124 | 0.6725223 |
| Q8R4G6 | Mgat5   | -0.296235 | 1.245753  | 0.8188496 | 0.8943678 | 1.3779589 | 1.0250066 | 0.2274342 | 0.6442378 |
| Q765H6 | Mgat5b  | 0.9908589 | 0.6919317 | 0.1726468 | 0.8743196 | 0.7884184 | 0.8721723 | 0.3824571 | 0.6606339 |
| Q9EQQ9 | Mgea5   | -0.49355  | 0.8304986 | 0.5710233 | 0.8753373 | 0.1545403 | 0.7240074 | 0.8380432 | 0.7519044 |
| O35678 | Mgll    | 0.3171931 | 0.7226917 | 0.6739584 | 0.8900083 | -0.646432 | 1.3906422 | 0.6584336 | 0.7203181 |
| Q91VS7 | Mgst1   | 0.6155978 | 0.3221628 | 0.0600646 | 0.8743196 | 0.2013591 | 0.4169163 | 0.6308164 | 0.7120542 |
| Q91ZV0 | Mia2    | 0.1201239 | 1.0954819 | 0.9157612 | 0.9048359 | 0.0385223 | 0.6232231 | 0.9527206 | 0.7710231 |
| Q8BI84 | Mia3    | 0.2404395 | 0.5979589 | 0.6932816 | 0.8900083 | -2.351731 | 0.9920374 | 0.0338975 | 0.6209341 |
| Q8R516 | Mib2    | -0.057123 | 0.6770251 | 0.9351216 | 0.9048359 | 0.2150943 | 0.7282929 | 0.7776876 | 0.7428116 |
| Q9CQ86 | Mien1   | -1.505912 | 1.3531728 | 0.3025133 | 0.8743196 | -2.653986 | 2.0962119 | 0.2524169 | 0.6500471 |
| Q5UAK0 | Mier1   | 1.3983117 | 0.5923132 | 0.0502847 | 0.8743196 | 1.0592056 | 0.6453627 | 0.151853  | 0.6211692 |

|        |          |           |           |           |           |           |           |           |           |
|--------|----------|-----------|-----------|-----------|-----------|-----------|-----------|-----------|-----------|
| P34884 | Mif      | -0.626071 | 0.4355575 | 0.1585797 | 0.8743196 | -0.059697 | 0.430821  | 0.89061   | 0.7593428 |
| Q9JM52 | Mink1    | -0.07742  | 0.9284763 | 0.9346489 | 0.9048359 | 1.2060469 | 0.6930703 | 0.1054346 | 0.6209341 |
| Q9Z2L6 | Minpp1   | -0.259968 | 0.5429849 | 0.6466923 | 0.8896469 | -0.238997 | 1.0368977 | 0.8253668 | 0.749518  |
| A6H611 | Mipep    | 1.3512175 | 0.6259132 | 0.0677284 | 0.8743196 | -0.22863  | 0.789493  | 0.7818755 | 0.7436402 |
| Q80WQ8 | Mis18bp1 | 0.8329877 | 0.4620647 | 0.0915515 | 0.8743196 | -0.680883 | 0.5993613 | 0.2764601 | 0.6500471 |
| Q5SW45 | Mks1     | -1.600269 | 1.185126  | 0.2189478 | 0.8743196 | -0.275907 | 1.7794083 | 0.8818623 | 0.7585208 |
| Q8C4M7 | Mlf1ip   | -1.105898 | 1.1242617 | 0.3580494 | 0.8743196 | 0.5511147 | 0.8718985 | 0.5506408 | 0.6980496 |
| Q99KX1 | Mlf2     | -0.244664 | 0.6820781 | 0.7248151 | 0.8910745 | -0.832346 | 0.7178038 | 0.267078  | 0.6500471 |
| P55200 | Mll      | -1.437682 | 1.3728551 | 0.3298048 | 0.8743196 | -0.6611   | 1.2372974 | 0.6123358 | 0.7082928 |
| Q6PDK2 | Mll2     | -0.088517 | 1.028975  | 0.9325846 | 0.9048359 | 0.8236616 | 0.5953722 | 0.1898269 | 0.6405321 |
| Q8BRH4 | Mll3     | -0.469057 | 0.5862297 | 0.4361282 | 0.8743196 | -0.968771 | 0.6121663 | 0.137544  | 0.6209341 |
| O54826 | Mllt10   | 0.6674997 | 0.5052257 | 0.2279846 | 0.8743196 | -1.228692 | 0.6924899 | 0.126368  | 0.6209341 |
| A2AM29 | Mllt3    | 1.9819872 | 0.6850873 | 0.0232152 | 0.8743196 | 1.6455252 | 0.9020892 | 0.117944  | 0.6209341 |
| Q9QZQ1 | Mllt4    | -0.814449 | 0.4424325 | 0.0785818 | 0.8743196 | -0.514409 | 0.4763005 | 0.2929907 | 0.6532982 |
| Q9ESL4 | Mltk     | 1.6344152 | 0.8327362 | 0.0904585 | 0.8743196 | 1.2570406 | 0.876323  | 0.2014425 | 0.6429844 |
| Q2VPU4 | Mlxip    | 0.0262077 | 0.2274927 | 0.9092844 | 0.9048359 | -0.135327 | 0.218919  | 0.5434461 | 0.6979269 |
| Q99J39 | Mlycd    | -1.129548 | 0.4291569 | 0.0188565 | 0.8743196 | -1.216766 | 0.756446  | 0.1317237 | 0.6209341 |
| Q9CQY7 | Mmd      | -0.237494 | 0.275648  | 0.4174498 | 0.8743196 | -1.669744 | 0.5922634 | 0.0303838 | 0.6209341 |
| Q9WTR0 | Mmp16    | -0.446283 | 0.6747448 | 0.5295107 | 0.8753373 | -0.109938 | 0.3725333 | 0.7778561 | 0.7428116 |
| P33434 | Mmp2     | -1.203126 | 0.527939  | 0.0567273 | 0.8743196 | 0.8997489 | 0.4554672 | 0.0956262 | 0.6209341 |
| Q9R0S2 | Mmp24    | -0.273241 | 0.3825286 | 0.4981613 | 0.8748057 | 0.3626933 | 0.3913431 | 0.3897929 | 0.6611124 |
| A6H6E2 | Mmrn2    | -1.165425 | 0.7151342 | 0.1239885 | 0.8743196 | -0.638216 | 0.4166427 | 0.1495372 | 0.6209341 |
| B1AUR6 | Mms22l   | 1.0490138 | 0.8560063 | 0.2600245 | 0.8743196 | 1.2588221 | 0.9213523 | 0.2208408 | 0.6434585 |
| Q921Y0 | Mob1a    | -0.039654 | 0.0972314 | 0.6955858 | 0.8900083 | -0.12497  | 0.1173707 | 0.3279516 | 0.6594641 |
| Q8VI63 | Mob2     | 0.7712138 | 0.2686105 | 0.0116573 | 0.8743196 | -0.393624 | 0.8312459 | 0.6436853 | 0.7165096 |
| Q69ZX6 | Morc2a   | 0.2942119 | 0.8261503 | 0.7322393 | 0.8923639 | 0.5723211 | 0.6744469 | 0.4286656 | 0.6694352 |
| Q8BMD7 | Morc4    | 0.073842  | 0.344621  | 0.8364444 | 0.8943678 | -0.241451 | 0.2941203 | 0.4430747 | 0.6699704 |
| Q6PGF2 | Morn4    | 0.812905  | 0.7919003 | 0.3388033 | 0.8743196 | -0.520411 | 1.1977591 | 0.6791254 | 0.7239064 |
| B1AU72 | Mospd2   | 0.9696773 | 0.4937899 | 0.0903199 | 0.8743196 | 0.8160991 | 0.4875453 | 0.1451758 | 0.6209341 |
| Q9CWP6 | Mospd2   | 0.151328  | 0.4003396 | 0.7166328 | 0.8910745 | -0.868923 | 0.2498179 | 0.013171  | 0.6209341 |
| P23249 | Mov10    | -0.324238 | 0.493379  | 0.5159167 | 0.8753373 | 0.4207286 | 0.4227666 | 0.3284848 | 0.6594641 |
| Q3UD86 | Mov10    | -1.23448  | 1.7350335 | 0.4997902 | 0.8753373 | 1.0299171 | 1.2065533 | 0.4260849 | 0.6694352 |
| P56379 | Mp68     | 0.8241973 | 0.9110881 | 0.395728  | 0.8743196 | 0.0483876 | 1.0551769 | 0.9649121 | 0.7735697 |
| P63030 | Mpc1     | -0.038788 | 2.0110961 | 0.9851505 | 0.9078335 | -0.11149  | 2.1873516 | 0.9610036 | 0.7730074 |
| Q9D023 | Mpc2     | 0.1992538 | 0.7352712 | 0.7900896 | 0.8943678 | -1.714701 | 0.956724  | 0.096382  | 0.6209341 |
| A1L314 | Mpeg1    | -0.479716 | 1.444932  | 0.7496095 | 0.8923639 | 1.1496301 | 1.213502  | 0.3800286 | 0.6602564 |
| A6H5Y1 | Mphosph9 | -0.586297 | 0.7884897 | 0.4813436 | 0.8743196 | -0.462338 | 0.244614  | 0.1076411 | 0.6209341 |
| Q924M7 | Mpi      | -0.227157 | 0.4175361 | 0.5886109 | 0.8753373 | 0.2038561 | 0.4339964 | 0.6406832 | 0.7152196 |
| P11247 | Mpo      | -0.734117 | 1.0025962 | 0.4878225 | 0.8743196 | -0.818081 | 1.0544742 | 0.4673244 | 0.6738937 |
| Q99J99 | Mpst     | 0.5173932 | 0.3240061 | 0.1139224 | 0.8743196 | 0.0363182 | 0.3955937 | 0.9270931 | 0.7637514 |
| D6RI47 | Mpv17    | -0.190944 | 0.4284311 | 0.6692847 | 0.8900083 | -0.600343 | 0.2242391 | 0.0366706 | 0.6209341 |
| Q3UR85 | MRF      | -0.194284 | 0.2222067 | 0.4109252 | 0.8743196 | -0.56369  | 0.2297834 | 0.0495791 | 0.6209341 |
| A2T114 | Mrgpra9  | 0.2825941 | 0.7055706 | 0.700717  | 0.8901989 | 0.186129  | 0.7652948 | 0.8159426 | 0.7474231 |
| Q8VCJ6 | Mrgprf   | -0.668183 | 0.8758097 | 0.470428  | 0.8743196 | -1.196898 | 1.6924504 | 0.5059686 | 0.6836804 |
| Q9CQT1 | Mri1     | -0.067325 | 0.449227  | 0.8816401 | 0.9006736 | 0.8393718 | 0.411992  | 0.0494587 | 0.6209341 |
| Q99J25 | Mrm1     | 0.7445863 | 0.6619209 | 0.2977239 | 0.8743196 | 0.5633238 | 0.8600701 | 0.5367706 | 0.695758  |
| Q9DB15 | Mrpl12   | 0.6980679 | 0.8163598 | 0.4207971 | 0.8743196 | 0.1838125 | 1.0738516 | 0.8697159 | 0.7571111 |
| Q9CPR5 | Mrpl15   | 2.0468771 | 1.2445574 | 0.1440375 | 0.8743196 | 1.5639806 | 1.3854622 | 0.3020639 | 0.6540599 |
| Q9D338 | Mrpl19   | -0.674023 | 0.7555966 | 0.4019931 | 0.8743196 | 0.289452  | 0.5177656 | 0.5963667 | 0.7056501 |
| Q9CQ06 | Mrpl24   | 0.1987479 | 0.6482421 | 0.7680703 | 0.8923639 | -0.149572 | 0.826594  | 0.8623647 | 0.7561118 |
| Q921S7 | Mrpl37   | -1.11656  | 2.1620067 | 0.6130724 | 0.8794961 | 0.9635591 | 1.6524433 | 0.5697959 | 0.6997388 |
| Q8K2M0 | Mrpl38   | 2.9457957 | 1.2489497 | 0.0504437 | 0.8743196 | 2.7087931 | 1.3423598 | 0.0901581 | 0.6209341 |
| Q9JKF7 | Mrpl39   | 0.8427073 | 0.6233062 | 0.2184294 | 0.8743196 | 0.1610185 | 1.4305841 | 0.9140551 | 0.7627031 |
| Q9Z2Q5 | Mrpl40   | 0.118105  | 0.2576858 | 0.6606054 | 0.8900083 | -0.078046 | 0.2038167 | 0.714975  | 0.7303836 |
| Q9D0Q7 | Mrpl45   | 0.5251429 | 0.6044214 | 0.4137316 | 0.8743196 | -0.927518 | 0.677673  | 0.2201286 | 0.6434585 |
| Q9EQI8 | Mrpl46   | -0.415394 | 0.6158677 | 0.5102654 | 0.8753373 | 0.0835438 | 0.5704044 | 0.8858019 | 0.7592752 |
| Q8JZS9 | Mrpl48   | 0.5897553 | 0.9526944 | 0.555493  | 0.8753373 | 0.556347  | 0.3136317 | 0.1264421 | 0.6209341 |
| Q9CQE3 | Mrps17   | 0.1410292 | 0.9017593 | 0.8801378 | 0.9006736 | 0.4735721 | 1.0547665 | 0.6692052 | 0.7222728 |
| Q99N85 | Mrps18a  | 1.7147825 | 1.1660738 | 0.1848759 | 0.8743196 | 1.2558382 | 1.5766329 | 0.4560751 | 0.6712964 |
| Q8R2L5 | Mrps18c  | 2.5995609 | 1.2129152 | 0.0693026 | 0.8743196 | 2.506653  | 1.4549388 | 0.1356875 | 0.6209341 |
| Q9CXW2 | Mrps22   | 0.1434319 | 0.5333641 | 0.7916554 | 0.8943678 | 0.4372279 | 0.3171993 | 0.1913397 | 0.6418859 |

|        |        |           |           |           |           |           |           |           |            |
|--------|--------|-----------|-----------|-----------|-----------|-----------|-----------|-----------|------------|
| Q9D125 | Mrps25 | -0.379958 | 1.8562593 | 0.8436387 | 0.8958903 | 2.1808509 | 1.4033157 | 0.1711622 | 0.6323131  |
| Q8BK72 | Mrps27 | -1.257017 | 0.8970295 | 0.2038653 | 0.8743196 | -1.536839 | 1.0651397 | 0.1991628 | 0.6429844  |
| Q9CY16 | Mrps28 | -0.310986 | 0.8455612 | 0.7181704 | 0.8910745 | -0.677477 | 0.7558368 | 0.386375  | 0.6611124  |
| Q9D0G0 | Mrps30 | 0.2544873 | 0.331869  | 0.4682506 | 0.8743196 | -0.256889 | 0.4813709 | 0.6127573 | 0.7082928  |
| Q61733 | Mrps31 | 1.2453985 | 0.9424324 | 0.2278957 | 0.8743196 | 1.6645554 | 1.1984114 | 0.2142026 | 0.6429844  |
| Q8BJZ4 | Mrps35 | -0.158095 | 0.3416234 | 0.6501672 | 0.8900083 | -0.740206 | 0.8234445 | 0.3850459 | 0.6611124  |
| Q9CQX8 | Mrps36 | -0.885619 | 0.9458394 | 0.3639341 | 0.8743196 | -0.636175 | 0.8040664 | 0.4430254 | 0.6699704  |
| Q9D6T9 | Mrps36 | -0.621267 | 0.5726119 | 0.3138812 | 0.8743196 | -0.792582 | 0.5106305 | 0.1716094 | 0.6323131  |
| Q99N87 | Mrps5  | -0.06943  | 1.1033772 | 0.9515853 | 0.9060514 | -0.282196 | 2.1425529 | 0.8995192 | 0.7608777  |
| P58064 | Mrps6  | 0.5959076 | 0.3405149 | 0.1235896 | 0.8743196 | -0.627763 | 0.4125853 | 0.1789465 | 0.6376965  |
| Q80X85 | Mrps7  | 0.6054844 | 1.3613075 | 0.6699051 | 0.8900083 | -0.046582 | 1.2905903 | 0.9723784 | 0.7753815  |
| Q9D7N3 | Mrps9  | -1.45441  | 2.1744184 | 0.5250136 | 0.8753373 | 0.5730334 | 1.3083038 | 0.6767166 | 0.7239064  |
| P19437 | Ms4a1  | 0.3900234 | 0.642854  | 0.5631977 | 0.8753373 | -0.319006 | 0.891894  | 0.7328334 | 0.7326734  |
| Q99N08 | Ms4a6c | -0.090618 | 0.4627285 | 0.8503035 | 0.8962775 | -1.564535 | 1.9561824 | 0.4543232 | 0.6712964  |
| P54276 | Msh6   | 0.2258745 | 0.4670183 | 0.6433951 | 0.8892276 | -1.577561 | 1.1778023 | 0.2289406 | 0.6442378  |
| Q920Q6 | Msi2   | -0.072638 | 0.7628095 | 0.9253973 | 0.9048359 | 0.5704335 | 0.7807199 | 0.4779549 | 0.6788349  |
| Q6PDM1 | Msl1   | -0.030134 | 1.0985841 | 0.9788825 | 0.9073254 | 0.5896288 | 0.6792591 | 0.4187294 | 0.6694352  |
| Q69F8  | Msl2   | 0.2868222 | 0.9195663 | 0.7641939 | 0.8923639 | -0.766031 | 1.090643  | 0.5087687 | 0.6853401  |
| P26041 | Msn    | -0.159401 | 0.2488996 | 0.5230512 | 0.8753373 | -0.251792 | 0.2399329 | 0.2962618 | 0.6540599  |
| Q9D6Y7 | Msra   | 0.0373479 | 0.2580289 | 0.8852485 | 0.9006736 | 0.057122  | 0.3918803 | 0.8844937 | 0.7586148  |
| Q78J03 | MsrB2  | -0.147819 | 0.286194  | 0.6079264 | 0.8792876 | -0.016624 | 0.2404815 | 0.9452234 | 0.7694372  |
| Q8BU85 | MsrB3  | 0.6262478 | 0.6513358 | 0.3515539 | 0.8743196 | 0.3562258 | 0.7937777 | 0.660985  | 0.7211958  |
| P02802 | Mt1    | -0.558371 | 0.8638499 | 0.5227938 | 0.8753373 | 0.0368363 | 0.4477702 | 0.9350419 | 0.7669305  |
| P02798 | Mt2    | -0.928751 | 1.0796271 | 0.4181366 | 0.8743196 | -0.010874 | 1.1586479 | 0.9928164 | 0.7789098  |
| Q9CQ65 | Mtap   | -0.436085 | 0.3873621 | 0.2671379 | 0.8743196 | 0.0512943 | 0.4783579 | 0.9152368 | 0.7627031  |
| P03930 | Mtatp8 | 0.5696337 | 0.3187851 | 0.087144  | 0.8743196 | 0.2534224 | 0.4228341 | 0.5556739 | 0.6980496  |
| Q791T5 | Mtch1  | 0.3846489 | 1.5037511 | 0.8054645 | 0.8943678 | 0.3104177 | 1.6107129 | 0.8535355 | 0.7542822  |
| Q791V5 | Mtch2  | -0.35563  | 0.4162127 | 0.4016724 | 0.8743196 | -0.839105 | 0.3653085 | 0.0325507 | 0.6209341  |
| P00397 | Mtco1  | 1.8992436 | 0.7113226 | 0.0319989 | 0.8743196 | 1.8260609 | 0.8212312 | 0.0678642 | 0.6209341  |
| P00405 | Mtco2  | 0.192371  | 0.5056442 | 0.7056777 | 0.8910745 | -0.419197 | 0.5231308 | 0.4285093 | 0.6694352  |
| P00158 | Mt-Cyb | -0.167434 | 0.2899503 | 0.5817199 | 0.8753373 | -0.241705 | 0.2568738 | 0.3830528 | 0.6606339  |
| Q80WJ7 | Mtdh   | -0.350987 | 0.4336012 | 0.4448843 | 0.8743196 | -0.604888 | 0.5940619 | 0.3478585 | 0.6594641  |
| Q07243 | Mtf1   | 0.4222005 | 0.5786181 | 0.4892829 | 0.8743196 | 0.3295637 | 0.6169031 | 0.612392  | 0.7082928  |
| Q9CZF3 | Mtf1   | -0.113763 | 0.3229681 | 0.735024  | 0.8923639 | -0.166722 | 0.232658  | 0.5005519 | 0.6823283  |
| Q9CRB8 | Mtfp1  | 0.2815651 | 0.7939547 | 0.7333057 | 0.8923639 | -0.166114 | 0.9690399 | 0.8695278 | 0.7571111  |
| Q922D8 | Mthfd1 | -0.065536 | 0.2316033 | 0.7774055 | 0.8940257 | -0.147306 | 0.2371507 | 0.5350647 | 0.695758   |
| Q9D110 | Mthfs  | -0.811464 | 0.8061973 | 0.3476775 | 0.8743196 | -1.811528 | 0.7337848 | 0.0485402 | 0.6209341  |
| Q91YJ5 | Mtif2  | -0.021491 | 0.8901412 | 0.9814119 | 0.907495  | 0.0485992 | 1.3692181 | 0.9728371 | 0.7754267  |
| Q3V1L6 | Mtmr11 | -0.063104 | 0.904311  | 0.9463192 | 0.9060514 | 0.3707148 | 0.8837767 | 0.6894793 | 0.7245556  |
| Q80TA6 | Mtmr12 | 0.2032075 | 1.1988783 | 0.8701993 | 0.898064  | 1.5253736 | 0.5575756 | 0.0339274 | 0.6209341  |
| Q8K296 | Mtmr3  | 0.0607791 | 0.7238642 | 0.9354352 | 0.9048359 | 0.5816933 | 0.6282909 | 0.3902517 | 0.6611124  |
| P03893 | Mtnd2  | -0.419429 | 0.6998216 | 0.5678314 | 0.8753373 | -1.147343 | 1.1914802 | 0.372757  | 0.6594641  |
| P03911 | Mtnd4  | 0.470409  | 0.2881788 | 0.1234162 | 0.8743196 | -0.976579 | 0.4008483 | 0.0299755 | 0.6209341  |
| Q9JLN9 | Mtor   | 0.0223792 | 0.8281853 | 0.9787984 | 0.9073254 | 0.6230633 | 0.8376446 | 0.4702121 | 0.6757189  |
| Q9D0D3 | Mtpap  | -0.462563 | 0.4807985 | 0.3680611 | 0.8743196 | -0.179255 | 0.1337302 | 0.228631  | 0.6442378  |
| P62774 | Mtpn   | 0.9213586 | 0.3396651 | 0.0124199 | 0.8743196 | 0.7073338 | 0.4435134 | 0.1264289 | 0.6209341  |
| Q8K126 | Mtrf1  | 0.80078   | 0.4216411 | 0.0993231 | 0.8743196 | 0.5164198 | 0.6192735 | 0.4362648 | 0.6699704  |
| O08601 | Mttp   | 0.0448343 | 0.3153411 | 0.8872178 | 0.9006736 | 0.3333701 | 0.3422983 | 0.3327081 | 0.6594641  |
| Q3UHD3 | Mtus2  | 0.6049582 | 1.4033216 | 0.6793668 | 0.8900083 | 1.1713459 | 1.4702115 | 0.4559741 | 0.6712964  |
| P47802 | Mtx1   | 0.1189141 | 0.3218946 | 0.7227371 | 0.8910745 | -1.288658 | 0.6169619 | 0.0817433 | 0.6209341  |
| O88441 | Mtx2   | -0.13289  | 0.9829401 | 0.8962624 | 0.9016528 | -0.42908  | 0.9272671 | 0.6598605 | 0.7211958  |
| E9PUF1 | Muc20  | 0.1651608 | 0.7624248 | 0.8314187 | 0.8943678 | 0.8769323 | 0.5699027 | 0.1478466 | 0.6209341  |
| Q8BUE7 | Muc20  | 0.0667864 | 1.2440264 | 0.9586856 | 0.9067461 | 1.2857653 | 0.9602874 | 0.2290854 | 0.6442378  |
| Q80T03 | Muc6   | -0.690393 | 0.7700736 | 0.3792589 | 0.8743196 | 0.2544196 | 0.44791   | 0.576347  | 0.7017063  |
| P28665 | Mug1   | -0.26277  | 0.185467  | 0.1583189 | 0.8743196 | -0.003132 | 0.209384  | 0.9880851 | 0.7775007  |
| P11588 | Mup1   | -0.102293 | 0.4704751 | 0.8340787 | 0.8943678 | -0.196609 | 0.3451635 | 0.5896145 | 0.77051736 |
| B5X0G2 | Mup17  | -0.531769 | 0.4223171 | 0.2205989 | 0.8743196 | 0.4758453 | 0.2777403 | 0.1021219 | 0.6209341  |
| P11589 | Mup2   | 0.6202818 | 0.696642  | 0.4028209 | 0.8743196 | 1.1654559 | 0.5950711 | 0.0978964 | 0.6209341  |
| Q5FW60 | Mup20  | 0.9474602 | 0.3475709 | 0.0085835 | 0.8743196 | 0.7469887 | 0.4167981 | 0.0794038 | 0.6209341  |
| P04939 | Mup3   | 0.3016931 | 0.4128221 | 0.4703851 | 0.8743196 | -0.002656 | 0.4451687 | 0.9952833 | 0.7793235  |
| A2AMM0 | Murc   | -0.352973 | 0.260046  | 0.180214  | 0.8743196 | -0.284977 | 0.2734541 | 0.302569  | 0.6540599  |

|        |          |           |           |           |           |           |           |           |           |
|--------|----------|-----------|-----------|-----------|-----------|-----------|-----------|-----------|-----------|
| P16332 | Mut      | 0.0571491 | 0.1886493 | 0.7622664 | 0.8923639 | -0.060299 | 0.2381556 | 0.800433  | 0.7439635 |
| Q99JF5 | Mvd      | 0.3218966 | 0.7449613 | 0.6696939 | 0.8900083 | -0.051845 | 0.6908337 | 0.9409232 | 0.7688429 |
| Q9EQK5 | Mvp      | -0.662361 | 0.4345818 | 0.1305399 | 0.8743196 | -0.452994 | 0.4495465 | 0.3163149 | 0.6594641 |
| P09922 | Mx1      | 0.0459883 | 0.3918219 | 0.9081237 | 0.9048359 | -0.041733 | 0.4318223 | 0.9244834 | 0.7634944 |
| P50538 | Mxd1     | -0.480147 | 0.4450815 | 0.316448  | 0.8743196 | -0.650037 | 0.3919142 | 0.1482646 | 0.6209341 |
| Q9DBV4 | Mxra8    | -0.672399 | 0.6780451 | 0.3543908 | 0.8743196 | -2.566719 | 1.5186315 | 0.141956  | 0.6209341 |
| Q7TPV4 | Mybbp1a  | 0.2940592 | 0.385228  | 0.470201  | 0.8743196 | 0.1373891 | 0.3955121 | 0.7401739 | 0.7346307 |
| P51960 | Mybl1    | -0.389277 | 0.7441147 | 0.6170224 | 0.8816934 | -1.713936 | 0.6652094 | 0.0419645 | 0.6209341 |
| O70468 | Mybpc3   | 0.2811544 | 1.1022123 | 0.805992  | 0.8943678 | 0.5516645 | 1.0336586 | 0.6127317 | 0.7082928 |
| Q9EQS3 | Mycbp    | 0.03287   | 0.7702027 | 0.9665219 | 0.9067656 | 0.3832369 | 0.5809112 | 0.5209524 | 0.6929797 |
| Q5SUV2 | Mycbpap  | -0.502678 | 0.3356876 | 0.1779412 | 0.8743196 | -0.120226 | 0.2524606 | 0.6507649 | 0.7191997 |
| P22366 | Myd88    | -1.42541  | 1.1050428 | 0.2380575 | 0.8743196 | 0.4242847 | 0.9829328 | 0.681074  | 0.7239064 |
| Q8C854 | Myef2    | -0.299167 | 0.4622655 | 0.5239258 | 0.8753373 | -0.372531 | 0.4476231 | 0.4150994 | 0.6675611 |
| Q3U898 | Myeov2   | -0.195417 | 0.4856558 | 0.6994097 | 0.8901989 | -0.494157 | 0.6581216 | 0.4811373 | 0.6794597 |
| Q9JK81 | Myg1     | 0.0023059 | 0.2617535 | 0.993217  | 0.9100589 | -0.310249 | 0.3088549 | 0.3539079 | 0.6594641 |
| Q61879 | Myh10    | 0.7623275 | 0.5917434 | 0.238596  | 0.8743196 | 0.5735159 | 0.8099542 | 0.5054562 | 0.6836804 |
| O08638 | Myh11    | -0.062691 | 0.4293059 | 0.8858436 | 0.9006736 | 0.0306617 | 0.4736588 | 0.9493708 | 0.7706093 |
| Q6URW6 | Myh14    | -0.209698 | 0.7716053 | 0.7895046 | 0.8943678 | -0.310061 | 0.8394662 | 0.7178097 | 0.7303836 |
| P13541 | Myh3     | -0.310365 | 0.4638006 | 0.5135507 | 0.8753373 | -0.075476 | 0.289648  | 0.7985001 | 0.7439428 |
| Q5SX39 | Myh4     | -0.829397 | 0.5464144 | 0.1728327 | 0.8743196 | -1.352709 | 0.8282146 | 0.1535285 | 0.6211692 |
| Q61933 | Myh4     | 0.0046897 | 0.7185533 | 0.9949746 | 0.9101811 | 0.0665259 | 0.3164377 | 0.8404428 | 0.7524932 |
| Q61934 | Myh4     | -0.19264  | 0.7374849 | 0.8014477 | 0.8943678 | 0.6754843 | 0.8169175 | 0.4399486 | 0.6699704 |
| Q02566 | Myh6     | -0.753327 | 0.4319953 | 0.0910992 | 0.8743196 | -0.218107 | 0.3271743 | 0.5106603 | 0.686814  |
| A2AQP0 | Myh7b    | 0.1488207 | 0.6048335 | 0.8078242 | 0.8943678 | -0.183345 | 0.9101398 | 0.8423838 | 0.752567  |
| Q8VDD5 | Myh9     | -0.072422 | 0.1146689 | 0.5280333 | 0.8753373 | -0.360588 | 0.1277458 | 0.0050408 | 0.6209341 |
| Q3THE2 | Myl12b   | -0.311343 | 0.7528583 | 0.6850573 | 0.8900083 | -0.283687 | 0.5716246 | 0.6279812 | 0.7115945 |
| P51667 | Myl2     | -0.163515 | 0.3114518 | 0.6012132 | 0.8786913 | 0.1394485 | 0.313326  | 0.6578272 | 0.7202908 |
| P09542 | Myl3     | 0.0625541 | 0.2288849 | 0.7851704 | 0.8943678 | 0.0138677 | 0.2543243 | 0.9566356 | 0.7721509 |
| Q60605 | Myl6     | 0.130426  | 0.3340568 | 0.6977263 | 0.8900083 | -0.025939 | 0.2649251 | 0.9224101 | 0.7632924 |
| Q6PDN3 | Mylik    | -0.100875 | 0.6908859 | 0.888031  | 0.9006736 | 0.6509015 | 0.5420501 | 0.2750737 | 0.6500471 |
| Q3UIZ8 | Mylik3   | -0.018958 | 0.37386   | 0.9597419 | 0.9067461 | -0.842461 | 0.4863665 | 0.0896686 | 0.6209341 |
| Q99MD8 | Mynn     | 0.113169  | 0.519641  | 0.8305331 | 0.8943678 | -0.578602 | 0.6265229 | 0.3725636 | 0.6594641 |
| F8VQB6 | Myo10    | -0.13474  | 0.3898898 | 0.7398075 | 0.8923639 | -1.290413 | 0.6655409 | 0.1005961 | 0.6209341 |
| Q9QZZ4 | Myo15a   | -0.872726 | 0.9156042 | 0.3722501 | 0.8743196 | -0.075909 | 0.3549455 | 0.8377383 | 0.7519044 |
| I7HPW8 | Myo15b   | 0.9171846 | 1.0820067 | 0.4246537 | 0.8743196 | 1.3582856 | 0.8127911 | 0.1457286 | 0.6209341 |
| Q9JMH9 | Myo18a   | -0.68705  | 0.5034502 | 0.2145974 | 0.8743196 | -0.886905 | 0.7490611 | 0.28118   | 0.6506857 |
| O88329 | Myo1a    | 1.6704445 | 1.0952591 | 0.171048  | 0.8743196 | 1.8493989 | 1.0587129 | 0.1312635 | 0.6209341 |
| P46735 | Myo1b    | -1.053289 | 0.8888574 | 0.2746868 | 0.8743196 | 0.1439539 | 0.1552124 | 0.3894706 | 0.6611124 |
| P70248 | Myo1f    | -0.662845 | 0.929869  | 0.4868885 | 0.8743196 | -1.125959 | 0.847313  | 0.2067482 | 0.6429844 |
| Q9D6A1 | Myo1h    | -0.037014 | 0.7288597 | 0.9601684 | 0.9067461 | 0.6432364 | 0.8224867 | 0.4481884 | 0.6701719 |
| Q8K3H5 | Myo3a    | 0.9699653 | 1.4352915 | 0.5208631 | 0.8753373 | 1.8068294 | 1.551495  | 0.2883971 | 0.652142  |
| Q99104 | Myo5a    | -0.99026  | 1.4817444 | 0.5140911 | 0.8753373 | 0.5490838 | 0.5789543 | 0.3602208 | 0.6594641 |
| P97479 | Myo7a    | 0.6284201 | 1.0065987 | 0.5522255 | 0.8753373 | 0.4815168 | 0.7143861 | 0.5253948 | 0.69337   |
| Q9QY06 | Myo9b    | -0.535063 | 0.4584052 | 0.255078  | 0.8743196 | 0.1359072 | 0.3947343 | 0.7342141 | 0.7331318 |
| Q69ZN7 | Myof     | 0.1295992 | 0.4141126 | 0.7564097 | 0.8923639 | 0.1281062 | 0.4992929 | 0.7994517 | 0.7439428 |
| Q62234 | Myom1    | -0.582771 | 0.4639142 | 0.2216521 | 0.8743196 | -0.600635 | 0.4585478 | 0.2050888 | 0.6429844 |
| A2ABU4 | Myom3    | 0.9837056 | 1.0360494 | 0.3739982 | 0.8743196 | -0.481346 | 1.2691096 | 0.717541  | 0.7303836 |
| D6RGM5 | Myoz2    | 0.3208924 | 0.5789141 | 0.5966288 | 0.8770074 | -0.557567 | 0.8176691 | 0.5207422 | 0.6929797 |
| Q9JJW5 | Myoz2    | -0.895682 | 0.8161301 | 0.3087452 | 0.8743196 | -0.883704 | 0.4673335 | 0.1075105 | 0.6209341 |
| Q5DTJ9 | Mypn     | 0.8223477 | 0.8065296 | 0.3418512 | 0.8743196 | -0.755455 | 1.7658057 | 0.6837087 | 0.7239498 |
| Q8K3I4 | Myrip    | -0.599688 | 0.5268261 | 0.2924485 | 0.8743196 | -0.530267 | 0.2173462 | 0.0504898 | 0.6209341 |
| Q3UIJ9 | Myzap    | 0.6258636 | 0.719842  | 0.4134198 | 0.8743196 | 0.624412  | 0.7114222 | 0.413869  | 0.6675611 |
| Q3V2Q8 | N4bp2l1  | 0.9827637 | 0.7161019 | 0.2123015 | 0.8743196 | 0.5620261 | 0.9911883 | 0.5912644 | 0.7052403 |
| Q9QY36 | Naa10    | 0.6886709 | 0.4708852 | 0.1870006 | 0.8743196 | 0.0576393 | 0.7846953 | 0.9438322 | 0.7691222 |
| Q80UM3 | Naa15    | -0.137482 | 0.3186752 | 0.6791393 | 0.8900083 | -0.20377  | 0.3362322 | 0.5666931 | 0.6997388 |
| Q9DBB4 | Naa16    | 1.4433095 | 1.0407212 | 0.2080482 | 0.8743196 | 1.818173  | 0.9397439 | 0.1011752 | 0.6209341 |
| Q6PHQ8 | Naa35    | -0.747973 | 0.4631301 | 0.1271363 | 0.8743196 | 0.2526985 | 0.4519717 | 0.5855951 | 0.7049451 |
| Q6PGB6 | Naa50    | -0.313545 | 1.1804312 | 0.7981856 | 0.8943678 | -0.646927 | 1.0159406 | 0.5477804 | 0.6980496 |
| Q9CZR2 | Naalad2  | -1.244913 | 1.0008833 | 0.2326556 | 0.8743196 | 0.2445696 | 0.3415786 | 0.4866555 | 0.6800488 |
| Q7M758 | Naaladl1 | -0.715687 | 0.4574688 | 0.1616897 | 0.8743196 | -0.857906 | 0.4263571 | 0.0908801 | 0.6209341 |
| P70670 | Naca     | -0.406136 | 0.2922081 | 0.1681101 | 0.8743196 | 0.1088223 | 0.2178469 | 0.6188452 | 0.7091807 |

|        |         |           |           |           |           |           |           |           |           |
|--------|---------|-----------|-----------|-----------|-----------|-----------|-----------|-----------|-----------|
| Q8C5H8 | Nadkd1  | -0.138808 | 0.6698149 | 0.836361  | 0.8943678 | 0.3301158 | 0.650343  | 0.6133508 | 0.7084882 |
| Q711T7 | Nadsyn1 | 0.1091006 | 0.7771975 | 0.8902299 | 0.9006736 | 0.7387206 | 0.5960522 | 0.2371225 | 0.6452164 |
| Q8VBW6 | Nae1    | 0.2819372 | 0.5213786 | 0.596617  | 0.8770074 | 0.3795231 | 0.5145306 | 0.4738557 | 0.6774295 |
| Q9QWR8 | Naga    | 0.0757796 | 0.3096988 | 0.8079809 | 0.8943678 | -0.101329 | 0.3769943 | 0.7897228 | 0.7439428 |
| D3YXG2 | Nagk    | -0.714115 | 0.3756246 | 0.0990399 | 0.8743196 | -1.826547 | 0.4865017 | 0.0094601 | 0.6209341 |
| Q9QUK4 | Naip2   | -0.262031 | 0.594419  | 0.6726377 | 0.8900083 | -0.351318 | 0.8736931 | 0.7015381 | 0.7266885 |
| Q99KQ4 | Nampt   | 0.0351551 | 0.228095  | 0.8777723 | 0.9006736 | -0.09657  | 0.2241944 | 0.6675482 | 0.7215904 |
| P28656 | Nap1I1  | 0.008241  | 0.2902546 | 0.9774939 | 0.9072902 | -0.270195 | 0.3396792 | 0.4318748 | 0.6694352 |
| Q78ZA7 | Nap1I4  | 1.4819406 | 0.7173281 | 0.0443732 | 0.8743196 | 1.4026532 | 0.7740261 | 0.0772907 | 0.6209341 |
| Q9JJF0 | Nap1I5  | -0.814839 | 1.08865   | 0.4785561 | 0.8743196 | -1.496048 | 0.7719835 | 0.1007309 | 0.6209341 |
| Q9DB05 | Napa    | 1.2797037 | 1.1270256 | 0.293556  | 0.8743196 | 0.6613161 | 1.3239983 | 0.6352224 | 0.7134626 |
| Q8CC86 | Napr1   | 0.3899201 | 0.2882186 | 0.1799589 | 0.8743196 | 0.0925055 | 0.2581412 | 0.7211739 | 0.7303836 |
| Q8BP47 | Nars    | 0.4929615 | 0.4383347 | 0.2650153 | 0.8743196 | 0.3422844 | 0.4494656 | 0.4495899 | 0.6701719 |
| Q8K224 | Nat10   | -0.311288 | 1.1566739 | 0.7955946 | 0.8943678 | -0.653391 | 0.9412687 | 0.5135474 | 0.6888545 |
| P50295 | Nat2    | 0.7590498 | 0.5734751 | 0.2272255 | 0.8743196 | -1.747243 | 0.8752507 | 0.0929043 | 0.6209341 |
| Q80TN7 | Nav3    | -0.47716  | 0.5643832 | 0.4258093 | 0.8743196 | -0.251899 | 0.4461766 | 0.5928275 | 0.7055393 |
| Q9EPN1 | Nbea    | 0.3519625 | 0.5121679 | 0.5024432 | 0.8753373 | 0.7802336 | 0.4916621 | 0.1365434 | 0.6209341 |
| Q6ZQA0 | Nbeal2  | 0.2034149 | 0.3743861 | 0.5948862 | 0.8770074 | -0.31735  | 0.6813213 | 0.6490764 | 0.7186202 |
| P13595 | Ncam1   | -0.826481 | 0.7138811 | 0.284946  | 0.8743196 | -0.303972 | 0.6303898 | 0.6467518 | 0.7177722 |
| P55066 | Ncan    | -0.339272 | 0.8179395 | 0.6907133 | 0.8900083 | 0.7700882 | 0.645149  | 0.2776614 | 0.6500471 |
| Q8C156 | Ncaph   | 1.869653  | 1.0689576 | 0.1237657 | 0.8743196 | 0.4098326 | 2.4020599 | 0.8701329 | 0.7571111 |
| Q9Z0E0 | Ncdn    | 1.1556533 | 0.641773  | 0.1147635 | 0.8743196 | 0.5665282 | 0.7508438 | 0.4790928 | 0.6788349 |
| Q8K1X4 | Nckap11 | 0.5935973 | 0.9495229 | 0.5516971 | 0.8753373 | 0.3530719 | 0.9779051 | 0.7304347 | 0.7325694 |
| P09405 | Ncl     | -0.214023 | 0.2612429 | 0.414696  | 0.8743196 | -0.041896 | 0.2485329 | 0.8665435 | 0.7571111 |
| P70365 | Ncoa1   | -0.322222 | 0.8052024 | 0.7009582 | 0.8901989 | 0.3297614 | 0.3561963 | 0.3902751 | 0.6611124 |
| Q9JL19 | Ncoa6   | 1.520033  | 0.4655413 | 0.0137673 | 0.8743196 | 1.209689  | 0.5287718 | 0.0621369 | 0.6209341 |
| Q6DFV7 | Ncoa7   | -1.960675 | 1.2510844 | 0.1610571 | 0.8743196 | 0.1381486 | 0.1750686 | 0.4600831 | 0.6712964 |
| Q9WU42 | Ncor2   | -0.56542  | 0.5270666 | 0.3189594 | 0.8743196 | -0.216952 | 0.7590475 | 0.7846264 | 0.7439428 |
| P57716 | Ncstn   | -1.084317 | 1.4824436 | 0.488268  | 0.8743196 | 0.1082236 | 1.0959299 | 0.9245529 | 0.7634944 |
| Q91ZP6 | Ndfip2  | -0.087697 | 0.5948599 | 0.8869538 | 0.9006736 | 0.2136611 | 0.2545391 | 0.4334079 | 0.6697843 |
| Q9QYG0 | Ndrg2   | 0.3021417 | 0.2831879 | 0.2887072 | 0.8743196 | 0.4161127 | 0.31418   | 0.1889922 | 0.6405321 |
| Q99LC3 | Ndufa10 | 0.226082  | 0.2748428 | 0.4170258 | 0.8743196 | -0.431495 | 0.505762  | 0.4010768 | 0.6629633 |
| Q9D8B4 | Ndufa11 | -0.672437 | 0.6575174 | 0.3226656 | 0.8743196 | -0.320429 | 0.2053649 | 0.1426969 | 0.6209341 |
| Q7TMF3 | Ndufa12 | -1.357977 | 1.0562492 | 0.2394569 | 0.8743196 | 0.162976  | 0.3030037 | 0.6100233 | 0.7082928 |
| Q9ERS2 | Ndufa13 | -0.163115 | 0.5526558 | 0.7694463 | 0.8923639 | 0.2658832 | 0.5128858 | 0.6075324 | 0.7082928 |
| Q9CQ75 | Ndufa2  | -0.124992 | 0.3020281 | 0.6828243 | 0.8900083 | -0.573465 | 0.3239221 | 0.0919068 | 0.6209341 |
| Q9CQ91 | Ndufa3  | -0.839684 | 0.6455476 | 0.2345311 | 0.8743196 | -1.352293 | 0.9157786 | 0.1902297 | 0.6405321 |
| Q62425 | Ndufa4  | -0.234539 | 0.4166439 | 0.5757743 | 0.8753373 | 0.3340284 | 0.2720393 | 0.2254839 | 0.6442378 |
| Q9CPP6 | Ndufa5  | -0.344258 | 0.4980117 | 0.4999581 | 0.8753373 | -0.876159 | 0.5245246 | 0.1187293 | 0.6209341 |
| Q9CQZ5 | Ndufa6  | -1.148526 | 1.111846  | 0.3359716 | 0.8743196 | -0.575445 | 1.9474485 | 0.7775813 | 0.7428116 |
| Q9Z1P6 | Ndufa7  | -0.555907 | 0.8076307 | 0.5017598 | 0.8753373 | -0.641868 | 0.632572  | 0.3287651 | 0.6594641 |
| Q9DCJ5 | Ndufa8  | 0.6594585 | 1.1734241 | 0.5781606 | 0.8753373 | 1.6698108 | 1.0255544 | 0.1150965 | 0.6209341 |
| Q9DC69 | Ndufa9  | -0.487729 | 0.2717044 | 0.080395  | 0.8743196 | -1.084294 | 0.3494583 | 0.0038446 | 0.6028231 |
| Q9CR21 | Ndufab1 | -0.07477  | 0.3954605 | 0.8516965 | 0.8962775 | -0.397622 | 0.4022718 | 0.3347443 | 0.6594641 |
| Q9JKL4 | Ndufaf3 | 1.0293215 | 1.3194552 | 0.4608847 | 0.8743196 | 0.2649397 | 1.7866297 | 0.8869719 | 0.7592752 |
| A2AIL4 | Ndufaf6 | 1.3286572 | 1.4519649 | 0.3905847 | 0.8743196 | 0.3419285 | 1.508935  | 0.8282557 | 0.751416  |
| Q9CWG8 | Ndufaf7 | 0.0187554 | 0.4784746 | 0.9692493 | 0.9072902 | -1.09888  | 0.4581846 | 0.0321851 | 0.6209341 |
| Q9DCS9 | Ndufb10 | 0.2975764 | 0.2537956 | 0.2469035 | 0.8743196 | -0.308019 | 0.2722403 | 0.2644513 | 0.6500471 |
| O09111 | Ndufb11 | -0.850692 | 0.613551  | 0.1788868 | 0.8743196 | -0.249217 | 0.2522954 | 0.3350523 | 0.6594641 |
| Q9CQZ6 | Ndufb3  | -1.14746  | 0.6159332 | 0.0821676 | 0.8743196 | -0.169496 | 0.2121445 | 0.4386647 | 0.6699704 |
| Q9CQC7 | Ndufb4  | 1.1962719 | 0.9465664 | 0.2255895 | 0.8743196 | 1.9785734 | 0.8179231 | 0.0309619 | 0.6209341 |
| Q9CQH3 | Ndufb5  | -0.153926 | 0.3308236 | 0.655859  | 0.8900083 | 0.0508354 | 0.4822848 | 0.9194896 | 0.7627031 |
| Q9CR61 | Ndufb7  | -0.230692 | 0.5529449 | 0.6824377 | 0.8900083 | 0.4881981 | 0.5137494 | 0.3593107 | 0.6594641 |
| Q9D6J5 | Ndufb8  | 0.3560823 | 0.453253  | 0.4578554 | 0.8743196 | 0.5404935 | 0.4263346 | 0.2518555 | 0.6500471 |
| Q9CQJ8 | Ndufb9  | -0.718497 | 0.6531153 | 0.2826664 | 0.8743196 | -0.463899 | 0.6756154 | 0.5001988 | 0.6823283 |
| Q9CQ54 | Ndufc2  | 0.4549905 | 0.979047  | 0.6562354 | 0.8900083 | 0.0338947 | 1.0658726 | 0.975663  | 0.776185  |
| Q91VD9 | Ndufs1  | -0.414501 | 0.374242  | 0.269566  | 0.8743196 | -0.406548 | 0.3630713 | 0.2645759 | 0.6500471 |
| Q91WD5 | Ndufs2  | -0.197807 | 0.3508943 | 0.5749446 | 0.8753373 | 0.0419126 | 0.3209043 | 0.8965621 | 0.7605778 |
| Q9DCT2 | Ndufs3  | -0.28883  | 0.22367   | 0.2029077 | 0.8743196 | -0.581632 | 0.2744077 | 0.0401409 | 0.6209341 |
| Q9CXZ1 | Ndufs4  | 0.8687241 | 0.554619  | 0.1274204 | 0.8743196 | 0.1562791 | 0.7335131 | 0.8328841 | 0.7519044 |
| Q99LY9 | Ndufs5  | -0.680551 | 0.7553328 | 0.3818299 | 0.8743196 | -0.134679 | 0.6457127 | 0.8380132 | 0.7519044 |

|        |           |           |           |           |           |           |           |           |           |
|--------|-----------|-----------|-----------|-----------|-----------|-----------|-----------|-----------|-----------|
| P52503 | Ndufs6    | 0.3702483 | 0.3268313 | 0.2621949 | 0.8743196 | 0.3485839 | 0.3365643 | 0.3055261 | 0.6553142 |
| Q9DC70 | Ndufs7    | -1.530022 | 1.015516  | 0.1420251 | 0.8743196 | -0.30165  | 0.3275213 | 0.3652024 | 0.6594641 |
| Q8K3J1 | Ndufs8    | 0.3788576 | 0.4011881 | 0.349826  | 0.8743196 | -0.049058 | 0.4194518 | 0.9074651 | 0.7612577 |
| Q91YT0 | Ndufv1    | 0.5639838 | 0.2489406 | 0.025173  | 0.8743196 | 0.7502539 | 0.2351634 | 0.0018478 | 0.5840626 |
| Q9D6J6 | Ndufv2    | 0.2462945 | 0.3838707 | 0.5237927 | 0.8753373 | 0.033112  | 0.485977  | 0.9459613 | 0.769669  |
| Q0II04 | Nebi      | -1.900234 | 1.0683705 | 0.1185324 | 0.8743196 | -1.699011 | 1.4402029 | 0.2827694 | 0.6508436 |
| P46935 | Nedd4     | -0.339231 | 0.3516602 | 0.337991  | 0.8743196 | 0.3114127 | 0.2493377 | 0.216375  | 0.6434585 |
| Q8CFI0 | Nedd4l    | 0.8092314 | 0.5006803 | 0.1196725 | 0.8743196 | 0.5830547 | 0.5205719 | 0.2759727 | 0.6500471 |
| P29595 | Nedd8     | -0.048885 | 0.343957  | 0.8877138 | 0.9006736 | -0.091376 | 0.3460288 | 0.7933193 | 0.7439428 |
| Q80Z24 | Negr1     | 0.5495545 | 0.390403  | 0.2020544 | 0.8743196 | -0.580965 | 0.7495358 | 0.4677189 | 0.6738937 |
| Q8K203 | Neil3     | -0.42144  | 0.5523185 | 0.4703693 | 0.8743196 | -0.583706 | 0.4255951 | 0.2192948 | 0.6434585 |
| O35942 | Nek2      | -0.06276  | 1.3606584 | 0.9644993 | 0.9067461 | -1.189457 | 1.0903553 | 0.3171803 | 0.6594641 |
| Q8CCP0 | Nemf      | 0.3104508 | 0.9424298 | 0.7514792 | 0.8923639 | 0.8181756 | 0.6796459 | 0.2739906 | 0.6500471 |
| Q9CQ45 | Nenf      | -0.673533 | 1.295189  | 0.6190808 | 0.8816934 | -0.552262 | 0.2055945 | 0.0362371 | 0.6209341 |
| Q9Z206 | Net1      | 0.1772518 | 0.5125544 | 0.739638  | 0.8923639 | -0.58127  | 0.5787517 | 0.3539798 | 0.6594641 |
| Q9JMH3 | Neu2      | 0.7197378 | 0.6231558 | 0.2859947 | 0.8743196 | 0.5421282 | 0.6380703 | 0.4281209 | 0.6694352 |
| Q9D0S4 | Neur12    | -0.613793 | 0.9079015 | 0.5207078 | 0.8753373 | -0.151205 | 0.5115607 | 0.7775156 | 0.7428116 |
| Q5NCX5 | Neur14    | -1.663313 | 0.6307386 | 0.0186666 | 0.8743196 | -0.266391 | 0.7168735 | 0.7161763 | 0.7303836 |
| P70660 | Neurog1   | 1.1269123 | 1.2909078 | 0.4116267 | 0.8743196 | 2.4589872 | 0.7979332 | 0.0216161 | 0.6209341 |
| Q7TPW1 | Nexn      | -1.284355 | 1.381268  | 0.383401  | 0.8743196 | -0.4861   | 1.1937576 | 0.697989  | 0.7265263 |
| Q9WV30 | Nfat5     | -0.273315 | 0.8136732 | 0.7467878 | 0.8923639 | -0.703981 | 1.7138799 | 0.6955201 | 0.7260377 |
| Q60591 | Nfatc2    | -0.016793 | 0.6633554 | 0.9805096 | 0.907495  | -0.859928 | 1.6076785 | 0.6119592 | 0.7082928 |
| Q8K120 | Nfatc4    | -0.123696 | 0.6174394 | 0.8469126 | 0.8962775 | -1.097983 | 0.572684  | 0.1036595 | 0.6209341 |
| Q07279 | Nfe2      | -0.180651 | 0.2042186 | 0.3903336 | 0.8743196 | -0.187191 | 0.1221064 | 0.1492406 | 0.6209341 |
| Q61985 | Nfe2l1    | 1.8049565 | 1.6945336 | 0.3221573 | 0.8743196 | 1.9112097 | 1.9274545 | 0.3596949 | 0.6594641 |
| P97863 | Nfib      | 0.9973517 | 0.9560897 | 0.3315565 | 0.8743196 | 0.8573214 | 0.956822  | 0.4047599 | 0.6646266 |
| Q6PIJ4 | Nfrkb     | -0.180784 | 0.4808067 | 0.7121801 | 0.8910745 | 0.1523709 | 0.3964334 | 0.7069294 | 0.7282267 |
| Q9Z1J3 | Nfs1      | -0.03825  | 0.3559018 | 0.9148036 | 0.9048359 | -0.161823 | 0.4000501 | 0.6876363 | 0.72435   |
| Q9QZ23 | Nfu1      | -0.432434 | 0.469518  | 0.366602  | 0.8743196 | -0.264654 | 0.3478042 | 0.4555789 | 0.6712964 |
| B1AY10 | Nfx1      | -1.088516 | 1.0640587 | 0.3403612 | 0.8743196 | -0.028408 | 0.2666166 | 0.9186193 | 0.7627031 |
| Q6LDU8 | Ngf       | 0.3099928 | 0.9972329 | 0.7649645 | 0.8923639 | 0.8405852 | 1.2766382 | 0.534692  | 0.695758  |
| Q8BZW8 | Nhlrc2    | 0.5431005 | 0.852139  | 0.5441788 | 0.8753373 | 1.4892421 | 0.6625113 | 0.0656327 | 0.6209341 |
| Q8CAF4 | Nhsl1     | -0.571554 | 0.4540243 | 0.2484357 | 0.8743196 | 0.1093893 | 0.3335781 | 0.7541077 | 0.7379888 |
| P10493 | Nid1      | -0.706118 | 1.6427227 | 0.6713082 | 0.8900083 | -1.04522  | 1.7355082 | 0.5537713 | 0.6980496 |
| Q9JL89 | Ninj2     | -0.273486 | 0.3627861 | 0.4755278 | 0.8743196 | -0.196909 | 0.165354  | 0.2786882 | 0.6503929 |
| Q6KCD5 | Nipbl     | 0.6718382 | 0.4011316 | 0.1146783 | 0.8743196 | 0.6834686 | 0.4021909 | 0.1130381 | 0.6209341 |
| O55125 | Nipsnap1  | -0.590163 | 0.3570936 | 0.1016963 | 0.8743196 | -0.401264 | 0.3701633 | 0.2814951 | 0.6506857 |
| Q9CQE1 | Nipsnap3b | -0.745762 | 1.0370765 | 0.495378  | 0.8748057 | -0.243122 | 0.7210426 | 0.7474625 | 0.7370067 |
| Q8VDK1 | Nit1      | -0.054216 | 0.3534581 | 0.8785288 | 0.9006736 | -0.204792 | 0.3227154 | 0.5280312 | 0.69337   |
| Q9JHW2 | Nit2      | 0.2607028 | 0.5117425 | 0.6117327 | 0.8792876 | 0.8137614 | 0.4709432 | 0.0880605 | 0.6209341 |
| Q0VF94 | Nkpd1     | -1.709856 | 1.1789025 | 0.1902387 | 0.8743196 | -2.232249 | 1.1092973 | 0.0908634 | 0.6209341 |
| Q8BY02 | Nkrf      | 0.8858678 | 0.5647687 | 0.1607408 | 0.8743196 | 0.5169601 | 0.8714924 | 0.5747173 | 0.7015295 |
| Q91YP2 | Nln       | -0.654849 | 0.749605  | 0.3961115 | 0.8743196 | 0.2510342 | 0.5484668 | 0.6547227 | 0.7198872 |
| Q66X22 | Nlrp9b    | 0.2114103 | 1.4735634 | 0.8899627 | 0.9006736 | 1.4849777 | 1.594007  | 0.3874933 | 0.6611124 |
| Q66X01 | Nlrp9c    | -0.185742 | 0.3690129 | 0.6301693 | 0.8854638 | -0.345649 | 0.3316036 | 0.3374134 | 0.6594641 |
| P15532 | Nme1      | -0.581572 | 0.3386495 | 0.0958958 | 0.8743196 | -1.361347 | 0.4065612 | 0.0024063 | 0.5840626 |
| Q01768 | Nme2      | 0.0891945 | 0.3575266 | 0.8040794 | 0.8943678 | 0.2997857 | 0.3297797 | 0.3686376 | 0.6594641 |
| Q9WV85 | Nme3      | 0.2024675 | 0.3558002 | 0.587109  | 0.8753373 | -0.093189 | 0.3827255 | 0.815738  | 0.7474231 |
| O88425 | Nme6      | -0.44682  | 0.8252577 | 0.605006  | 0.8792876 | -1.446758 | 1.1747234 | 0.2641853 | 0.6500471 |
| Q99JR6 | Nmnat3    | -0.04799  | 1.5039603 | 0.9754351 | 0.9072902 | 0.7940194 | 1.9605504 | 0.6995229 | 0.7266885 |
| O70310 | Nmt1      | 0.8168485 | 0.6924616 | 0.2565188 | 0.8743196 | 0.3304543 | 0.8419328 | 0.7010523 | 0.7266885 |
| Q8BZ39 | Nmur2     | -0.485388 | 0.465257  | 0.3315087 | 0.8743196 | -0.223454 | 0.1835441 | 0.2691407 | 0.6500471 |
| O55239 | Nnmt      | 0.4709739 | 3.4094418 | 0.894021  | 0.9007735 | 2.7306557 | 1.9683543 | 0.2146906 | 0.6429844 |
| Q61941 | Nnt       | -0.878981 | 0.7942891 | 0.2858875 | 0.8743196 | 0.1899976 | 0.494054  | 0.7067746 | 0.7282267 |
| Q9JF3  | No66      | -0.28026  | 0.652616  | 0.6805105 | 0.8900083 | 0.4956682 | 0.1954231 | 0.0442964 | 0.6209341 |
| Q9JJG9 | Noa1      | 1.8921636 | 0.8831347 | 0.0693722 | 0.8743196 | 1.3854743 | 1.3331806 | 0.3387542 | 0.6594641 |
| P43021 | Nodal     | 1.4382124 | 0.3432916 | 0.0040887 | 0.8743196 | 0.6381261 | 0.4632052 | 0.217496  | 0.6434585 |
| Q3UHX0 | Nol8      | -0.954939 | 1.4224764 | 0.5235435 | 0.8753373 | 0.4273928 | 1.4808374 | 0.7825872 | 0.7436402 |
| Q6GQT9 | Nomo1     | -0.177662 | 0.7150169 | 0.8109007 | 0.8943678 | 0.316524  | 0.6631473 | 0.6500336 | 0.7189488 |
| Q9D6Z1 | Nop56     | -1.108922 | 0.7545661 | 0.1623273 | 0.8743196 | 0.1272204 | 0.6276358 | 0.8425092 | 0.752567  |
| Q01705 | Notch1    | 0.4692544 | 0.5179965 | 0.3793092 | 0.8743196 | 0.2987106 | 0.5480349 | 0.5949419 | 0.7056501 |

|        |        |           |           |           |           |           |           |           |           |
|--------|--------|-----------|-----------|-----------|-----------|-----------|-----------|-----------|-----------|
| O35516 | Notch2 | -0.234418 | 0.3981214 | 0.5744889 | 0.8753373 | -0.193717 | 0.1618214 | 0.2764129 | 0.6500471 |
| Q8CIZ9 | Nox1   | -1.469726 | 1.0275145 | 0.1956935 | 0.8743196 | -2.055244 | 0.7619027 | 0.0356938 | 0.6209341 |
| P97460 | Npas2  | 0.425537  | 0.3272271 | 0.2130787 | 0.8743196 | -0.377943 | 0.5534723 | 0.5066842 | 0.6839106 |
| Q9QZQ0 | Npas3  | 1.0472884 | 1.1353087 | 0.3869737 | 0.8743196 | 1.769808  | 1.1644778 | 0.1793637 | 0.6381812 |
| Q9Z0J0 | Npc2   | 0.1184184 | 0.5788791 | 0.8437327 | 0.8958903 | -0.428713 | 0.4465691 | 0.3741203 | 0.6594641 |
| Q6NSR8 | Npepl1 | -0.27371  | 0.4311809 | 0.5351274 | 0.8753373 | 0.6542699 | 0.4435023 | 0.1639542 | 0.6273856 |
| Q11011 | Npepps | -0.056142 | 0.2538316 | 0.8252876 | 0.8943678 | -0.047325 | 0.2563746 | 0.8538639 | 0.7542822 |
| Q7TNH6 | Nphp3  | -0.725704 | 0.9644373 | 0.4763087 | 0.8743196 | 1.6405635 | 0.4777514 | 0.0139041 | 0.6209341 |
| P59240 | Nphp4  | -0.279351 | 0.6888094 | 0.6971776 | 0.8900083 | 0.2947564 | 1.1504039 | 0.8063396 | 0.745845  |
| P60670 | Nploc4 | -0.017708 | 2.4414152 | 0.9943084 | 0.9101811 | 0.4929166 | 2.5842311 | 0.8516757 | 0.7537615 |
| Q61937 | Npm1   | -0.094652 | 0.4142445 | 0.8202546 | 0.8943678 | 0.3295428 | 0.3537728 | 0.3570429 | 0.6594641 |
| P18293 | Npr1   | 0.1229555 | 0.5066952 | 0.8115542 | 0.8943678 | -0.114378 | 0.353699  | 0.7515534 | 0.7375672 |
| P70180 | Npr3   | -0.3884   | 0.4291588 | 0.3955323 | 0.8743196 | -1.30277  | 0.6171716 | 0.0792772 | 0.6209341 |
| P97300 | Nptn   | -0.53711  | 0.4272696 | 0.2279483 | 0.8743196 | -5.310265 | 2.1196742 | 0.0263279 | 0.6209341 |
| O70340 | Nptx2  | -0.327942 | 1.2642289 | 0.8027896 | 0.8943678 | 1.0848325 | 0.8847013 | 0.2660554 | 0.6500471 |
| Q99J85 | Nptxr  | -0.350597 | 0.6161226 | 0.5871163 | 0.8753373 | -0.110848 | 0.6712303 | 0.8742561 | 0.7577111 |
| Q9CYM8 | Nptxr  | 2.630332  | 1.9772614 | 0.2251248 | 0.8743196 | 1.6229865 | 2.2292247 | 0.494004  | 0.6823283 |
| Q64669 | Nqo1   | -0.122865 | 0.3256085 | 0.7084915 | 0.8910745 | 0.1992486 | 0.3551442 | 0.5794    | 0.7022002 |
| Q9J175 | Nqo2   | -0.210815 | 0.4163627 | 0.6140387 | 0.8798852 | 0.0556263 | 0.4959079 | 0.9110138 | 0.7623543 |
| Q61066 | Nr0b1  | -0.956881 | 0.779521  | 0.2592999 | 0.8743196 | 0.2628347 | 0.3165083 | 0.4380889 | 0.6699704 |
| Q60674 | Nr1d2  | 1.2939081 | 1.2983215 | 0.3521536 | 0.8743196 | 1.3912021 | 1.4571519 | 0.3765752 | 0.6594641 |
| Q80XB4 | Nrap   | -0.254279 | 0.4784781 | 0.6115586 | 0.8792876 | -0.809438 | 0.735416  | 0.3132334 | 0.6594641 |
| Q8BHG1 | Nrd1   | 0.1185484 | 1.1141323 | 0.9182468 | 0.9048359 | -0.042252 | 1.0623683 | 0.9695657 | 0.7751233 |
| Q07475 | NREP   | -0.629885 | 0.7220699 | 0.4119472 | 0.8743196 | 0.0379548 | 0.3830238 | 0.9242926 | 0.7634944 |
| Q6DR98 | Nrg1   | -0.043798 | 4.1256536 | 0.9918261 | 0.9095427 | -3.220244 | 5.202874  | 0.5587101 | 0.6980496 |
| P60761 | Nrgn   | -1.290317 | 0.4652103 | 0.0275501 | 0.8743196 | -0.523036 | 0.3153514 | 0.1482727 | 0.6209341 |
| Q923B3 | Nr1f1  | -0.068648 | 0.3869264 | 0.8642051 | 0.8974757 | -0.242037 | 0.3926921 | 0.5603034 | 0.6986486 |
| P97799 | Nrsn1  | 0.0103133 | 0.3376033 | 0.9764823 | 0.9072902 | -0.50585  | 0.3461015 | 0.1941709 | 0.6418859 |
| Q9CS84 | Nrxn1  | 1.5486279 | 1.2835232 | 0.2667964 | 0.8743196 | 1.2725955 | 1.6793909 | 0.4772838 | 0.6786974 |
| Q6P9K9 | Nrxn3  | -0.516306 | 0.3182411 | 0.1255486 | 0.8743196 | -0.07228  | 0.3057898 | 0.8168269 | 0.7474231 |
| O88491 | Nsd1   | -0.3473   | 0.3878173 | 0.3846526 | 0.8743196 | 0.0270321 | 0.4051153 | 0.9478144 | 0.7701996 |
| Q9R1J0 | Nsdhl  | -0.371131 | 0.6410993 | 0.5807993 | 0.8753373 | -1.352143 | 0.5637375 | 0.0534015 | 0.6209341 |
| Q9CZ44 | Nsfl1c | -0.110417 | 0.2244679 | 0.6238323 | 0.8826986 | -0.19498  | 0.2424467 | 0.42339   | 0.6694352 |
| O35242 | Nsmaf  | -0.28754  | 1.0439247 | 0.7909304 | 0.8943678 | -0.090122 | 0.5243028 | 0.8691749 | 0.7571111 |
| Q9JM14 | Nt5c   | -0.45362  | 0.6641822 | 0.5014445 | 0.8753373 | 0.1515859 | 0.6994582 | 0.8306226 | 0.7517136 |
| Q3V1L4 | Nt5c2  | 0.2078914 | 0.5660493 | 0.7242716 | 0.8910745 | -2.643557 | 1.7991287 | 0.1921279 | 0.6418859 |
| Q9D020 | Nt5c3  | 0.2242704 | 0.3220996 | 0.4888166 | 0.8743196 | 0.0708525 | 0.337495  | 0.834493  | 0.7519044 |
| Q8C5P5 | Nt5dc1 | -0.882652 | 0.5117413 | 0.1282175 | 0.8743196 | -0.529943 | 0.498054  | 0.3282517 | 0.6594641 |
| Q64311 | Ntan1  | 0.0203995 | 0.2733619 | 0.9426012 | 0.905186  | -1.02535  | 0.7335997 | 0.2116978 | 0.6429844 |
| Q99PJ0 | Ntm    | 0.719487  | 1.521714  | 0.6507336 | 0.8900083 | 1.7285386 | 1.6313571 | 0.330119  | 0.6594641 |
| Q8R2U4 | Ntmt1  | 2.3275213 | 1.3943662 | 0.1390015 | 0.8743196 | 2.1377114 | 1.5286954 | 0.2115003 | 0.6429844 |
| O09118 | Ntn1   | 0.4104172 | 0.910689  | 0.6658576 | 0.8900083 | -0.486164 | 0.9958338 | 0.6427373 | 0.7162065 |
| Q9D3P9 | Nts    | 2.4923752 | 1.9505766 | 0.2420731 | 0.8743196 | 3.3336869 | 1.7727802 | 0.1090816 | 0.6209341 |
| P54729 | Nub1   | 0.2097702 | 0.5130924 | 0.6948791 | 0.8900083 | 0.6741071 | 0.5978184 | 0.3025476 | 0.6540599 |
| Q02819 | Nucb1  | 0.0757449 | 0.2143938 | 0.7342656 | 0.8923639 | -0.060031 | 0.1708561 | 0.7373306 | 0.7346307 |
| P81117 | Nucb2  | 1.4279461 | 1.2111992 | 0.2769326 | 0.8743196 | 1.9778386 | 1.3584373 | 0.1956524 | 0.6424737 |
| O35685 | Nudc   | -1.186668 | 0.4552604 | 0.015776  | 0.8743196 | -0.565051 | 0.6370726 | 0.3856479 | 0.6611124 |
| Q9CQ48 | Nudcd2 | 0.1406301 | 1.0731377 | 0.8994259 | 0.9027695 | 1.2718854 | 1.1836658 | 0.3238854 | 0.6594641 |
| Q9DCN1 | Nudt12 | -1.369318 | 0.9465153 | 0.1580192 | 0.8743196 | 0.1102801 | 0.4758966 | 0.8184941 | 0.7476698 |
| P11930 | Nudt19 | 1.6698256 | 1.3457037 | 0.2546293 | 0.8743196 | 1.3682779 | 1.43566   | 0.3773574 | 0.6594641 |
| P56380 | Nudt2  | -0.143113 | 0.3769713 | 0.7062735 | 0.8910745 | -0.492322 | 0.4377953 | 0.2686568 | 0.6500471 |
| Q9J146 | Nudt3  | -0.426783 | 0.4341427 | 0.3411756 | 0.8743196 | -0.434717 | 0.3100993 | 0.1843791 | 0.6405321 |
| Q99P30 | Nudt7  | -0.144917 | 0.3501686 | 0.6803903 | 0.8900083 | 0.2800106 | 0.2948965 | 0.3465093 | 0.6594641 |
| Q9CR24 | Nudt8  | 1.0621131 | 0.6323906 | 0.1369424 | 0.8743196 | -0.32841  | 1.2126455 | 0.795604  | 0.7439428 |
| Q8BVU5 | Nudt9  | -0.085201 | 0.9524204 | 0.9312239 | 0.9048359 | -1.301514 | 1.3187564 | 0.361791  | 0.6594641 |
| Q9QXX8 | Nufip1 | 0.7205214 | 0.7751269 | 0.3673214 | 0.8743196 | 0.618239  | 1.0402705 | 0.562508  | 0.6997388 |
| Q8BH74 | Nup107 | 0.6116617 | 0.463925  | 0.2071312 | 0.8743196 | 0.0160766 | 0.9300956 | 0.9864718 | 0.7775007 |
| Q99P88 | Nup155 | -0.025807 | 0.3972048 | 0.948759  | 0.9060514 | -0.223467 | 0.7057766 | 0.7548092 | 0.7380125 |
| O89083 | Nup188 | -1.511193 | 1.7277719 | 0.4107681 | 0.8743196 | 0.2452331 | 0.6619515 | 0.7237591 | 0.730562  |
| Q6ZQH8 | Nup188 | -0.212656 | 0.2370927 | 0.3995496 | 0.8743196 | -0.396873 | 0.2215912 | 0.1234793 | 0.6209341 |
| F6XGN0 | Nup210 | 0.9416089 | 1.1946107 | 0.4564296 | 0.8743196 | 1.380603  | 1.3025391 | 0.3299674 | 0.6594641 |

|        |             |           |           |           |           |           |           |           |           |
|--------|-------------|-----------|-----------|-----------|-----------|-----------|-----------|-----------|-----------|
| Q9QY81 | Nup210      | -2.874941 | 0.6761061 | 0.0037828 | 0.8743196 | -0.844021 | 0.8287208 | 0.347754  | 0.6594641 |
| Q9D2F7 | Nup210l     | 0.1176233 | 0.623058  | 0.8556189 | 0.8971541 | 0.2427064 | 0.7728323 | 0.7641171 | 0.7393825 |
| Q8BJ71 | Nup93       | -0.807285 | 1.7478978 | 0.658192  | 0.8900083 | 0.4766543 | 1.6754912 | 0.7856012 | 0.7439428 |
| Q68G59 | Nup98       | 0.0514818 | 0.8254034 | 0.9520104 | 0.9060514 | -1.882656 | 0.8324979 | 0.0644193 | 0.6209341 |
| Q8CIC2 | Nupl2       | 0.9993342 | 1.1408819 | 0.410116  | 0.8743196 | -0.088959 | 1.3247743 | 0.9486441 | 0.7704627 |
| Q9ERH4 | Nusap1      | 0.1466138 | 0.5962279 | 0.8128123 | 0.8943678 | 0.2067252 | 0.4417778 | 0.6563423 | 0.7198872 |
| P61971 | Nutf2       | 0.1150625 | 0.834046  | 0.8941589 | 0.9007735 | -2.575353 | 3.1709057 | 0.4477038 | 0.6701628 |
| Q4ZGD9 | Nxf3        | -0.026461 | 0.6129489 | 0.9667712 | 0.9068059 | -0.071898 | 0.5050632 | 0.8914592 | 0.7595603 |
| Q52KP5 | Nxpe4       | 0.8811676 | 1.1591178 | 0.4719551 | 0.8743196 | 0.3635347 | 1.6306652 | 0.8309808 | 0.7517136 |
| G3X9N5 | Nxph4       | 0.2117555 | 0.4140199 | 0.6247616 | 0.8826986 | 0.2908387 | 0.4032849 | 0.4979279 | 0.6823283 |
| Q6PFX7 | Nyap1       | 0.5403608 | 0.5443028 | 0.3538972 | 0.8743196 | -1.095008 | 0.6776232 | 0.1572316 | 0.6211692 |
| P11928 | Oas1a       | -0.3426   | 0.6929718 | 0.6361656 | 0.8883187 | -0.147308 | 0.5312163 | 0.7908542 | 0.7439428 |
| E9Q9A9 | Oas2        | -0.969284 | 0.5986521 | 0.1262526 | 0.8743196 | 0.196037  | 0.285375  | 0.5041878 | 0.6828196 |
| P29758 | Oat         | -0.046887 | 0.204719  | 0.819089  | 0.8943678 | 0.1299974 | 0.1919007 | 0.4990769 | 0.6823283 |
| Q8K4U0 | Oaz3        | 1.8950097 | 1.0730014 | 0.1207251 | 0.8743196 | 2.3146966 | 1.0617201 | 0.0720476 | 0.6209341 |
| Q8K2X3 | Obfc1       | 0.2851206 | 0.7805443 | 0.7256868 | 0.8910745 | -0.82904  | 1.2884665 | 0.5437375 | 0.6979269 |
| A2AAJ9 | Obscn       | -0.170566 | 0.9046964 | 0.852985  | 0.8962775 | 0.3589149 | 0.6553112 | 0.5931765 | 0.7056501 |
| D3YYU8 | Obsl1       | 0.6476703 | 0.5455992 | 0.2739136 | 0.8743196 | 0.2763728 | 0.5985898 | 0.6605576 | 0.7211958 |
| Q9D8W7 | Ociad2      | 1.2192487 | 0.8253409 | 0.1831245 | 0.8743196 | 2.3247127 | 0.7186288 | 0.0177999 | 0.6209341 |
| A3KGV1 | Odf2        | -2.642007 | 4.5905681 | 0.5829528 | 0.8753373 | -0.097068 | 4.7464692 | 0.9843471 | 0.7770957 |
| Q60626 | Ofa         | -0.202159 | 0.6149412 | 0.751965  | 0.8923639 | 0.3383758 | 0.4014725 | 0.4316289 | 0.6694352 |
| Q80Z25 | Ofd1        | 0.0685872 | 0.2962551 | 0.820044  | 0.8943678 | 0.0265985 | 0.2076633 | 0.9000421 | 0.7609568 |
| Q60597 | Ogdh        | -0.000601 | 0.1644052 | 0.9970855 | 0.9109455 | 0.217021  | 0.1672286 | 0.1952301 | 0.6422079 |
| Q99PG2 | Ogfr        | -1.561036 | 1.3604044 | 0.2888845 | 0.8743196 | 0.1555453 | 1.1692059 | 0.8985153 | 0.7608777 |
| Q8VE52 | Ogfrl1      | -0.005999 | 0.4227546 | 0.9890749 | 0.9092148 | -0.737508 | 0.4484002 | 0.1511238 | 0.6209341 |
| Q9CZ30 | Ola1        | -0.133187 | 0.3253928 | 0.6841699 | 0.8900083 | -0.203822 | 0.3221242 | 0.5304143 | 0.6937933 |
| Q8R197 | Olah        | 0.4301754 | 0.7150563 | 0.5664081 | 0.8753373 | -0.259557 | 0.7975587 | 0.7558976 | 0.7380125 |
| Q8BHP7 | Olfml2a     | -0.305939 | 0.8136949 | 0.7180623 | 0.8910745 | 0.1610903 | 0.4175931 | 0.7129819 | 0.7303836 |
| Q8VGS7 | Olf1054     | -0.172486 | 0.6291644 | 0.7918822 | 0.8943678 | -1.293417 | 1.2629418 | 0.3452784 | 0.6594641 |
| Q8VFG7 | Olf1141     | -0.940016 | 0.8311485 | 0.2953169 | 0.8743196 | -1.838365 | 0.7543909 | 0.0506857 | 0.6209341 |
| A3KGY5 | Olf1224-ps1 | 0.918035  | 0.4418032 | 0.0763183 | 0.8743196 | 0.5313182 | 0.5533768 | 0.3740632 | 0.6594641 |
| Q8VEX7 | Olf1232     | -1.62227  | 1.1258561 | 0.1927999 | 0.8743196 | 0.0339721 | 0.2242581 | 0.884557  | 0.7586148 |
| Q8VFB1 | Olf1254     | -0.007101 | 0.5673381 | 0.9903623 | 0.909535  | -1.163681 | 0.863322  | 0.2263495 | 0.6442378 |
| Q8VF48 | Olf1295     | 0.9282032 | 1.1360259 | 0.4408108 | 0.8743196 | -0.330779 | 1.3332227 | 0.8123263 | 0.7466053 |
| Q8VF85 | Olf1310     | -1.069556 | 0.5987107 | 0.1171876 | 0.8743196 | -1.849388 | 1.1102627 | 0.1468209 | 0.6209341 |
| Q8VFU9 | Olf1427     | -0.184606 | 0.3981088 | 0.656932  | 0.8900083 | 0.1226896 | 0.4658013 | 0.8010584 | 0.7439635 |
| Q8VEV8 | Olf1449     | 0.2306232 | 0.3139157 | 0.4864196 | 0.8743196 | -0.064513 | 0.3888919 | 0.8736924 | 0.7576535 |
| P23275 | Olf15       | 1.0362009 | 0.585833  | 0.1202531 | 0.8743196 | 0.6003757 | 0.6378497 | 0.3829112 | 0.6606339 |
| Q8VGQ7 | Olf181      | -0.047684 | 0.7335226 | 0.9499865 | 0.9060514 | 0.1809823 | 0.3459946 | 0.6196663 | 0.7091807 |
| Q7TS17 | Olf1285     | 0.5182572 | 1.2311302 | 0.6864074 | 0.8900083 | 1.1722539 | 1.1284431 | 0.3389261 | 0.6594641 |
| Q60879 | Olf13       | 2.1116017 | 1.545393  | 0.2140877 | 0.8743196 | 1.7242232 | 1.7406142 | 0.3601401 | 0.6594641 |
| Q7TRW7 | Olf1412     | -0.559571 | 0.6346748 | 0.4072109 | 0.8743196 | -0.21492  | 0.4404503 | 0.6428996 | 0.7162065 |
| Q8VGL1 | Olf1522     | 0.1683596 | 0.4188092 | 0.6996784 | 0.8901989 | 0.1882574 | 0.3378449 | 0.5975274 | 0.706009  |
| Q8VBW9 | Olf163      | 0.1748049 | 0.6773392 | 0.8037714 | 0.8943678 | 0.3441061 | 0.7433835 | 0.6597549 | 0.7211958 |
| Q8VGY1 | Olf1643     | -0.484113 | 0.7332705 | 0.5302359 | 0.8753373 | -0.187551 | 0.2931111 | 0.5459031 | 0.6980396 |
| Q7TRP5 | Olf1664     | -0.998345 | 0.6861853 | 0.1890198 | 0.8743196 | -1.033645 | 0.9526738 | 0.3195836 | 0.6594641 |
| Q7TRP1 | Olf1675     | -1.236435 | 1.0621335 | 0.2825185 | 0.8743196 | -0.790603 | 0.7204702 | 0.3145669 | 0.6594641 |
| Q7TRN8 | Olf1684     | 0.6771673 | 0.2735456 | 0.0424881 | 0.8743196 | 0.1208697 | 0.3765954 | 0.7591303 | 0.7380771 |
| Q920Z2 | Olf1702     | -0.748291 | 0.956474  | 0.4596546 | 0.8743196 | -1.204072 | 0.7244707 | 0.1475752 | 0.6209341 |
| A0PK64 | Olf1714     | -2.004526 | 1.048187  | 0.0974167 | 0.8743196 | -2.176884 | 1.2184478 | 0.1242356 | 0.6209341 |
| Q8VET4 | Olf1729     | -1.132116 | 0.6482493 | 0.1242399 | 0.8743196 | -1.089475 | 0.5586526 | 0.0990339 | 0.6209341 |
| Q8VG16 | Olf1935     | -1.532843 | 0.8942171 | 0.1302166 | 0.8743196 | -2.246393 | 1.2562461 | 0.1239651 | 0.6209341 |
| Q9EQ84 | Olf1961     | -0.3628   | 1.0342535 | 0.7360696 | 0.8923639 | 0.4236545 | 1.2242081 | 0.7411065 | 0.7346307 |
| P58281 | Opa1        | 0.4544938 | 0.4374762 | 0.3333997 | 0.8743196 | -0.330268 | 0.4649001 | 0.5041153 | 0.6828196 |
| Q99J31 | Ophn1       | -0.632909 | 0.5734267 | 0.2871022 | 0.8743196 | -0.768286 | 0.3912665 | 0.0713314 | 0.6209341 |
| Q8K010 | Oplah       | -0.298965 | 0.2539216 | 0.2411116 | 0.8743196 | 0.2515373 | 0.2137665 | 0.2416868 | 0.6494004 |
| Q9WUV0 | Orc5        | 1.2451254 | 1.3634619 | 0.3915    | 0.8743196 | 1.226179  | 1.1935465 | 0.3438823 | 0.6594641 |
| Q60590 | Orm1        | 1.647944  | 1.0838346 | 0.1721961 | 0.8743196 | 0.2605645 | 1.3735724 | 0.8558003 | 0.7553078 |
| Q8K2C7 | Os9         | -3.213846 | 2.8236661 | 0.2924956 | 0.8743196 | -3.214864 | 3.2148826 | 0.3559202 | 0.6594641 |
| Q3B7Z2 | Osbp        | 0.3203291 | 0.3598802 | 0.3767992 | 0.8743196 | 0.6726736 | 0.3264907 | 0.0441117 | 0.6209341 |
| Q91XL9 | Osbpl1a     | -3.101412 | 1.9235065 | 0.127717  | 0.8743196 | -2.064628 | 1.6594929 | 0.2354166 | 0.6442378 |

|        |          |           |           |           |           |           |           |           |           |
|--------|----------|-----------|-----------|-----------|-----------|-----------|-----------|-----------|-----------|
| Q9ER64 | Osbpl5   | -0.252599 | 0.2650732 | 0.3723588 | 0.8743196 | -0.057297 | 0.1290925 | 0.6727149 | 0.7227095 |
| Q6PEB4 | Osgepl1  | -1.00962  | 2.1405866 | 0.6515201 | 0.8900083 | 0.2853884 | 1.2873162 | 0.831906  | 0.7519044 |
| P53347 | Osm      | 0.6908238 | 0.4302466 | 0.1523868 | 0.8743196 | 0.0850079 | 1.1615129 | 0.944036  | 0.7691222 |
| Q78XF5 | Ostc     | 1.3259965 | 1.3510107 | 0.359051  | 0.8743196 | 1.2572825 | 1.3451918 | 0.386041  | 0.6611124 |
| Q62422 | Ostf1    | -0.841016 | 1.34542   | 0.5413017 | 0.8753373 | 0.70732   | 0.5075933 | 0.1868424 | 0.6405321 |
| P11725 | Otc      | -0.093284 | 0.309249  | 0.7633866 | 0.8923639 | -0.04368  | 0.3209284 | 0.8919706 | 0.7595603 |
| Q8K561 | Otoa     | -0.699984 | 0.300517  | 0.0526708 | 0.8743196 | -0.589874 | 0.4491732 | 0.2370851 | 0.6452164 |
| Q9ESF1 | Otof     | -0.220738 | 0.2740286 | 0.4470089 | 0.8743196 | -0.181034 | 0.1318894 | 0.2189664 | 0.6434585 |
| O55225 | Otog     | -0.259141 | 0.223403  | 0.2840906 | 0.8743196 | -0.581727 | 0.2517816 | 0.0602323 | 0.6209341 |
| Q4ZJM7 | Otol1    | 0.3032957 | 0.3095772 | 0.3427676 | 0.8743196 | 0.4223756 | 0.3989934 | 0.3090548 | 0.6567071 |
| Q80VM9 | Otop1    | -1.745209 | 2.2996178 | 0.4726801 | 0.8743196 | -0.403846 | 1.088273  | 0.7233213 | 0.730562  |
| Q7TQI3 | Otub1    | 0.5971675 | 0.456993  | 0.1967413 | 0.8743196 | 0.2512102 | 0.5027867 | 0.6196142 | 0.7091807 |
| Q3TYB8 | Otub2    | -0.45867  | 0.8786272 | 0.617756  | 0.8816934 | -0.186608 | 0.7724512 | 0.8171512 | 0.7474231 |
| Q8R554 | Otud7a   | -1.121185 | 0.7610642 | 0.1841898 | 0.8743196 | -1.764092 | 0.7186915 | 0.0494816 | 0.6209341 |
| Q3UU35 | Ovos     | -0.707905 | 0.4000319 | 0.1201027 | 0.8743196 | -0.825073 | 0.8785861 | 0.3839325 | 0.6606339 |
| Q9D0K2 | Oxct1    | 0.1391136 | 0.239272  | 0.561654  | 0.8753373 | 0.1345738 | 0.249791  | 0.5907797 | 0.7051736 |
| Q9CR10 | Oxld1    | -0.275345 | 0.353783  | 0.4618915 | 0.8743196 | -0.530901 | 0.2359368 | 0.0654248 | 0.6209341 |
| Q8VE38 | Oxnad1   | -0.050568 | 0.3588591 | 0.888454  | 0.9006736 | -0.243011 | 0.3839386 | 0.529775  | 0.6933955 |
| Q4KMM3 | Oxr1     | -1.417282 | 0.9611404 | 0.1838234 | 0.8743196 | 0.3346909 | 0.2120543 | 0.1655677 | 0.6287192 |
| Q9D404 | Oxsm     | 0.0010848 | 0.4088944 | 0.9979002 | 0.911311  | 0.160013  | 0.373675  | 0.6718918 | 0.7227095 |
| D6RFV0 | Oxsr1    | 0.6003905 | 0.6950483 | 0.4163058 | 0.8743196 | 0.0485882 | 1.2103822 | 0.9692816 | 0.7751233 |
| Q6P9R2 | Oxsr1    | -0.871912 | 0.6262118 | 0.1841119 | 0.8743196 | -0.911048 | 0.6391943 | 0.1776345 | 0.6355136 |
| Q6W3F0 | P4ha3    | -1.896767 | 0.8685166 | 0.0652624 | 0.8743196 | -1.144987 | 0.3341081 | 0.0140228 | 0.6209341 |
| P09103 | P4hb     | 0.026764  | 0.1522079 | 0.8605414 | 0.897347  | 0.1098981 | 0.1574882 | 0.4859193 | 0.6797773 |
| P50580 | Pa2g4    | -0.428005 | 0.3752344 | 0.2571525 | 0.8743196 | -0.007694 | 0.3315272 | 0.9815454 | 0.7765385 |
| P29341 | Pabpc1   | 0.2083085 | 0.2753486 | 0.4508287 | 0.8743196 | 0.3287457 | 0.2261714 | 0.1490891 | 0.6209341 |
| Q9WVE8 | Pacsin2  | 0.1309498 | 0.4691293 | 0.781996  | 0.8940257 | -0.280403 | 0.544051  | 0.6104691 | 0.7082928 |
| Q8K3V4 | Padi6    | 0.549759  | 1.2836725 | 0.6813232 | 0.8900083 | 1.1193286 | 1.4636369 | 0.4734109 | 0.6774295 |
| P63005 | Pafah1b1 | 0.4820136 | 0.3484872 | 0.1744835 | 0.8743196 | -0.172363 | 0.3566259 | 0.6319701 | 0.7120542 |
| Q61206 | Pafah1b2 | -0.041454 | 0.7783071 | 0.9590113 | 0.9067461 | -0.444337 | 1.1009126 | 0.7004915 | 0.7266885 |
| Q8VDG7 | Pafah2   | -1.145833 | 1.5668737 | 0.4883556 | 0.8743196 | -1.80539  | 1.4496306 | 0.2594095 | 0.6500471 |
| P16331 | Pah      | -0.134228 | 0.2144458 | 0.5320492 | 0.8753373 | -0.183148 | 0.2278447 | 0.42255   | 0.6694352 |
| Q9DCL9 | Paics    | -0.055066 | 0.3301111 | 0.8678736 | 0.898064  | 0.2461959 | 0.3095671 | 0.4287127 | 0.6694352 |
| Q9DCE5 | Pak1ip1  | -1.338805 | 0.8701647 | 0.1678004 | 0.8743196 | -0.828767 | 0.8318151 | 0.357556  | 0.6594641 |
| Q3ULB5 | Pak6     | -1.103595 | 1.3435348 | 0.4384885 | 0.8743196 | -1.414675 | 1.0873316 | 0.2409674 | 0.6491941 |
| Q3U0P1 | Palb2    | 1.1018318 | 1.0707731 | 0.3377142 | 0.8743196 | 1.9328216 | 1.1004141 | 0.1295299 | 0.6209341 |
| P70261 | Pald1    | -0.051819 | 0.7023067 | 0.9432468 | 0.9054086 | -0.455477 | 0.7999517 | 0.5897618 | 0.7051736 |
| Q9ET54 | Palld    | 0.0303746 | 0.9706765 | 0.9754491 | 0.9072902 | 1.2488916 | 0.7704539 | 0.129013  | 0.6209341 |
| P97467 | Pam      | -0.565146 | 0.5196706 | 0.3128336 | 0.8743196 | -1.05292  | 0.8226676 | 0.2478423 | 0.6500471 |
| Q80YV4 | Pank4    | -1.504224 | 0.9909447 | 0.1728132 | 0.8743196 | -0.660027 | 0.4971189 | 0.2325525 | 0.6442378 |
| Q9JIP4 | Panx1    | 0.7773726 | 0.7052062 | 0.3067678 | 0.8743196 | 0.6649772 | 0.7597493 | 0.4150925 | 0.6675611 |
| Q8C0L6 | Paox     | -0.062999 | 0.2080192 | 0.7708059 | 0.8923639 | -0.572404 | 0.2044803 | 0.0311923 | 0.6209341 |
| Q6PB75 | Papd7    | 1.0773414 | 1.3249726 | 0.4429308 | 0.8743196 | 2.490122  | 0.8669387 | 0.0283411 | 0.6209341 |
| Q9EPX2 | Papln    | -0.73749  | 0.5052468 | 0.1877547 | 0.8743196 | -1.806174 | 0.8584784 | 0.0800422 | 0.6209341 |
| Q60967 | Papss1   | -0.460241 | 0.445034  | 0.3354569 | 0.8743196 | -2.305183 | 0.8881101 | 0.0409029 | 0.6209341 |
| O88428 | Papss2   | 0.3691968 | 0.4465081 | 0.409871  | 0.8743196 | 0.7049641 | 0.4760065 | 0.1414405 | 0.6209341 |
| Q9Z101 | Pard6a   | 0.515202  | 0.8318842 | 0.5553188 | 0.8753373 | -0.156437 | 0.9858621 | 0.8791268 | 0.7585208 |
| Q99LX0 | Park7    | -0.281188 | 0.321917  | 0.3839525 | 0.8743196 | -0.363759 | 0.3397619 | 0.2865211 | 0.6518056 |
| Q8VDG3 | Parn     | 1.0621426 | 0.6734425 | 0.1587594 | 0.8743196 | -0.072943 | 1.2340808 | 0.9547862 | 0.7716385 |
| P11103 | Parp1    | -1.192967 | 0.8463846 | 0.1790869 | 0.8743196 | 0.0259684 | 0.2519558 | 0.9194827 | 0.7627031 |
| Q8BZ20 | Parp12   | -1.924048 | 0.9382199 | 0.0794432 | 0.8743196 | -0.661528 | 0.8796587 | 0.4804841 | 0.6794597 |
| Q2EMV9 | Parp14   | -0.138475 | 0.9951496 | 0.8932502 | 0.9006736 | 0.3173275 | 0.8399299 | 0.7185816 | 0.7303836 |
| Q8CAS9 | Parp9    | -0.51961  | 0.2235872 | 0.0530832 | 0.8743196 | -0.352945 | 0.1486376 | 0.0551781 | 0.6209341 |
| A2ARM1 | Patl2    | 2.5844569 | 1.1842282 | 0.0654088 | 0.8743196 | 2.0566716 | 1.3510432 | 0.1787637 | 0.637649  |
| P09084 | Pax1     | 1.3857343 | 1.0925827 | 0.2240189 | 0.8743196 | 1.3432059 | 1.268427  | 0.3089008 | 0.6567071 |
| Q9DCG6 | Pblid1   | -0.303303 | 0.3019578 | 0.3190014 | 0.8743196 | -0.055819 | 0.2697666 | 0.8368401 | 0.7519044 |
| Q9CXN7 | Pblid2   | -0.357552 | 0.4484901 | 0.4273023 | 0.8743196 | 0.2409761 | 0.4416396 | 0.5867772 | 0.7049451 |
| D3Z1W6 | Pbrm1    | 0.9845272 | 1.0587498 | 0.3833728 | 0.8743196 | 0.5652288 | 1.6857548 | 0.7488137 | 0.7375672 |
| Q99NE9 | Pbx4     | -0.799027 | 0.8430165 | 0.3747856 | 0.8743196 | -1.824843 | 0.4167567 | 0.0046749 | 0.6209341 |
| Q05920 | Pc       | -0.211212 | 0.1261815 | 0.0948079 | 0.8743196 | -0.111258 | 0.1175642 | 0.3445092 | 0.6594641 |
| P61458 | Pcbd1    | 0.2044791 | 0.5732108 | 0.7262655 | 0.8910745 | 0.1256409 | 0.7355346 | 0.8669986 | 0.7571111 |

|        |         |           |           |           |           |           |           |           |           |
|--------|---------|-----------|-----------|-----------|-----------|-----------|-----------|-----------|-----------|
| Q9CZL5 | Pcbd2   | 0.0471443 | 0.6078161 | 0.9403458 | 0.9048359 | -0.751999 | 1.4855706 | 0.6307718 | 0.7120542 |
| P60335 | Pcbp1   | -0.296533 | 0.4277135 | 0.49104   | 0.8743196 | -0.009536 | 0.3571578 | 0.9788095 | 0.7762206 |
| Q61990 | Pcbp2   | -0.374623 | 0.7971351 | 0.652671  | 0.8900083 | -0.476388 | 1.0956977 | 0.6789237 | 0.7239064 |
| Q91ZA3 | Pcca    | 0.0827885 | 0.2380527 | 0.7282799 | 0.8918452 | 0.1913128 | 0.2310878 | 0.4085717 | 0.6664622 |
| Q99MN9 | Pccb    | 0.0855724 | 0.2050912 | 0.6769708 | 0.8900083 | 0.1180878 | 0.2158167 | 0.5849944 | 0.7049451 |
| Q8VHR0 | Pcdh18  | -1.609553 | 2.3280694 | 0.4998955 | 0.8753373 | 2.2852191 | 2.484193  | 0.3743775 | 0.6594641 |
| Q91Y10 | Pcdhac1 | -2.255659 | 1.2812601 | 0.1217133 | 0.8743196 | -0.042968 | 0.3741576 | 0.9123197 | 0.7624298 |
| Q91Y09 | Pcdhac2 | 0.7034975 | 0.6493353 | 0.3145264 | 0.8743196 | 0.335869  | 0.6786555 | 0.6382666 | 0.7145801 |
| Q91XY6 | Pcdhga2 | 1.1885777 | 1.4178699 | 0.4295627 | 0.8743196 | 1.2435983 | 1.7372907 | 0.5009945 | 0.6823283 |
| Q91XX2 | Pcdhgb8 | 0.6147294 | 0.6589104 | 0.3819    | 0.8743196 | 0.6479359 | 1.3008183 | 0.6361423 | 0.713543  |
| Q9Z2V4 | Pck1    | 0.0680177 | 0.1505287 | 0.6518098 | 0.8900083 | -0.177283 | 0.1824898 | 0.332518  | 0.6594641 |
| Q9QYX7 | Pclo    | -0.503852 | 0.6021322 | 0.4091207 | 0.8743196 | -0.436635 | 0.407476  | 0.2934034 | 0.6532982 |
| Q9R0L6 | Pcm1    | 0.9620492 | 1.5294195 | 0.5492988 | 0.8753373 | 2.5888798 | 1.6015883 | 0.1571254 | 0.6211692 |
| P23506 | Pcmt1   | -0.471449 | 0.3160571 | 0.1438344 | 0.8743196 | -0.503283 | 0.3043636 | 0.1074227 | 0.6209341 |
| P59913 | Pcmt1d1 | 0.0601417 | 0.469713  | 0.9017188 | 0.9036268 | -0.928687 | 1.5003971 | 0.5586944 | 0.6980496 |
| Q6P8I4 | Pcnp    | -0.547743 | 0.798393  | 0.5147502 | 0.8753373 | 0.3458468 | 0.3275137 | 0.3316313 | 0.6594641 |
| Q5DU28 | Pcnxl2  | -2.964044 | 0.9597273 | 0.0176059 | 0.8743196 | -0.980101 | 0.5266573 | 0.1120707 | 0.6209341 |
| Q8VI59 | Pcnxl3  | 0.0609117 | 0.3587319 | 0.8699725 | 0.898064  | -0.240121 | 0.6418531 | 0.7211894 | 0.7303836 |
| Q3UVY5 | Pcnxl4  | -0.014086 | 0.1593518 | 0.9320391 | 0.9048359 | -0.500882 | 0.1524472 | 0.0167051 | 0.6209341 |
| Q6W8Q3 | Pcp4l1  | 1.4420391 | 0.7219958 | 0.064266  | 0.8743196 | 1.0696884 | 1.2040754 | 0.3904729 | 0.6611124 |
| P53808 | Pctp    | 2.5450847 | 0.9259275 | 0.028558  | 0.8743196 | 2.9943145 | 0.8442909 | 0.0121226 | 0.6209341 |
| Q5SV41 | Pctp    | -0.845066 | 1.1063149 | 0.469911  | 0.8743196 | -0.562546 | 0.8487296 | 0.5320739 | 0.6942749 |
| Q9CQF9 | Pcyox1  | 1.5868141 | 1.0527609 | 0.1754667 | 0.8743196 | 2.2599222 | 1.0271495 | 0.070084  | 0.6209341 |
| P49586 | Pcyt1a  | -1.851195 | 1.1000916 | 0.1362992 | 0.8743196 | 0.3030099 | 0.7050467 | 0.6823669 | 0.7239064 |
| Q811Q9 | Pcyt1b  | -1.01154  | 1.7193529 | 0.5747965 | 0.8753373 | -1.089162 | 1.9376094 | 0.5943976 | 0.7056501 |
| Q922E4 | Pcyt2   | -0.275872 | 0.3811937 | 0.4713839 | 0.8743196 | -0.206521 | 0.3587896 | 0.5667559 | 0.6997388 |
| Q3UHX2 | Pdap1   | 0.0645231 | 0.3995783 | 0.8727648 | 0.8994914 | 0.0171091 | 0.4141578 | 0.9673523 | 0.7748325 |
| Q61823 | Pdcd4   | -0.685559 | 1.8398112 | 0.7204538 | 0.8910745 | 0.4390538 | 0.8714824 | 0.6323604 | 0.7120542 |
| P56812 | Pdcd5   | -1.093507 | 1.0706215 | 0.3410716 | 0.8743196 | -1.054124 | 0.5491828 | 0.1033463 | 0.6209341 |
| P12815 | Pdcd6   | -1.45335  | 0.8547682 | 0.1328738 | 0.8743196 | 0.2759073 | 0.516721  | 0.6125644 | 0.7082928 |
| Q9WU78 | Pdcd6ip | -0.491064 | 0.2453596 | 0.0484651 | 0.8743196 | -0.371137 | 0.2071328 | 0.0771479 | 0.6209341 |
| Q9WTY1 | Pdcd7   | 2.6539551 | 1.0656799 | 0.024975  | 0.8743196 | 2.8519698 | 1.1354031 | 0.0260007 | 0.6209341 |
| Q9DBX2 | Pdcl    | 0.9405093 | 0.5743811 | 0.145552  | 0.8743196 | 0.9817461 | 0.6491983 | 0.18123   | 0.6395902 |
| Q01065 | Pde1b   | -1.338767 | 0.9061166 | 0.1830696 | 0.8743196 | -1.986913 | 1.3531036 | 0.192374  | 0.6418859 |
| Q80YT7 | Pde4dip | -0.575639 | 0.5478868 | 0.3100513 | 0.8743196 | -0.815283 | 0.7539031 | 0.2991653 | 0.6540599 |
| P27664 | Pde6a   | -0.59597  | 0.4331727 | 0.2112808 | 0.8743196 | -1.574713 | 1.4051348 | 0.3052638 | 0.6553142 |
| Q9QXQ1 | Pde7b   | 0.2197936 | 0.4633923 | 0.6497151 | 0.8900083 | -0.254901 | 0.3710217 | 0.5177257 | 0.6910975 |
| P05622 | Pdgfrb  | -0.601832 | 1.1817978 | 0.6262323 | 0.882968  | -1.443798 | 1.0354136 | 0.2126359 | 0.6429844 |
| P35486 | Pdha1   | -0.138822 | 0.1676054 | 0.4083758 | 0.8743196 | -0.463125 | 0.1978426 | 0.0202136 | 0.6209341 |
| Q9D051 | Pdhb    | -0.054773 | 0.2298593 | 0.8119811 | 0.8943678 | 0.0033672 | 0.2616295 | 0.989751  | 0.7779037 |
| Q8BKZ9 | Pdhx    | 0.2902782 | 0.2234992 | 0.1977947 | 0.8743196 | -0.089833 | 0.294255  | 0.7610643 | 0.7380771 |
| P27773 | Pdia3   | 0.0197823 | 0.2105055 | 0.9251965 | 0.9048359 | 0.0968014 | 0.1727739 | 0.575804  | 0.7015295 |
| P08003 | Pdia4   | 0.3501154 | 0.1975899 | 0.0781464 | 0.8743196 | 0.286222  | 0.268281  | 0.2877092 | 0.6518981 |
| Q921X9 | Pdia5   | -0.094593 | 0.4468502 | 0.833453  | 0.8943678 | 0.1828813 | 0.3150002 | 0.5653554 | 0.6997388 |
| Q922R8 | Pdia6   | -0.285226 | 0.2059664 | 0.1693517 | 0.8743196 | -0.202665 | 0.2387545 | 0.3984111 | 0.6622315 |
| Q8BFP9 | Pdk1    | -0.49405  | 0.6808315 | 0.4711256 | 0.8743196 | 0.6780306 | 0.8213528 | 0.4131693 | 0.6675611 |
| Q9JK42 | Pdk2    | 0.2238071 | 0.6419911 | 0.7292541 | 0.8923639 | 0.8844732 | 0.7299741 | 0.2340002 | 0.6442378 |
| O70571 | Pdk4    | -0.244064 | 0.4324591 | 0.5901238 | 0.8753373 | -1.484739 | 0.6000597 | 0.0481748 | 0.6209341 |
| O70400 | Pdlim1  | 0.0917764 | 0.40706   | 0.8225977 | 0.8943678 | 0.2437961 | 0.4256828 | 0.5699635 | 0.6997388 |
| Q8R1G6 | Pdlim2  | -0.220453 | 0.2007626 | 0.3084985 | 0.8743196 | -0.244596 | 0.1429165 | 0.1378405 | 0.6209341 |
| P70271 | Pdlim4  | 0.0549491 | 1.3025505 | 0.9675287 | 0.9071294 | 0.840467  | 1.0501632 | 0.4540384 | 0.6712964 |
| Q3UV70 | Pdp1    | 1.058407  | 0.5312795 | 0.0866118 | 0.8743196 | -0.78279  | 1.4779587 | 0.6153758 | 0.7084882 |
| Q7TSQ8 | Pdpr    | 0.6518357 | 0.5999587 | 0.288528  | 0.8743196 | 0.9069014 | 0.6269073 | 0.1634929 | 0.6273856 |
| Q6A026 | Pds5a   | -1.715639 | 0.7251127 | 0.0498966 | 0.8743196 | 0.0292152 | 0.2615263 | 0.9146963 | 0.7627031 |
| Q4VA53 | Pds5b   | -0.795123 | 0.6854166 | 0.2840574 | 0.8743196 | -0.511061 | 0.359763  | 0.205266  | 0.6429844 |
| Q33DR2 | Pdss1   | 0.0106845 | 0.5722961 | 0.9856257 | 0.9078335 | 0.1507672 | 0.4628383 | 0.7556781 | 0.7380125 |
| Q33DR3 | Pdss2   | -0.070975 | 0.843348  | 0.9352864 | 0.9048359 | -1.32503  | 0.7391131 | 0.1231864 | 0.6209341 |
| P52946 | Pdx1    | -0.480372 | 0.6124924 | 0.4585833 | 0.8743196 | -0.392886 | 0.7021923 | 0.5960634 | 0.7056501 |
| Q99K01 | Pdxdc1  | -0.304735 | 0.490677  | 0.5438893 | 0.8753373 | -0.576401 | 0.3512221 | 0.1247293 | 0.6209341 |
| Q8K183 | Pdxk    | -1.754716 | 0.6941562 | 0.0143788 | 0.8743196 | 0.0725046 | 0.7008888 | 0.9180396 | 0.7627031 |
| Q9QY39 | Pdzd4   | -0.539847 | 0.6375465 | 0.4251293 | 0.8743196 | -0.415978 | 0.6361805 | 0.5374358 | 0.695758  |

|        |          |           |           |           |           |           |           |           |           |
|--------|----------|-----------|-----------|-----------|-----------|-----------|-----------|-----------|-----------|
| Q9JIL4 | Pdzk1    | 0.1557524 | 0.7860251 | 0.8485579 | 0.8962775 | 0.1202383 | 0.5893767 | 0.84509   | 0.753234  |
| Q62048 | Pea15    | -0.281793 | 0.3118842 | 0.380532  | 0.8743196 | -0.861083 | 0.27913   | 0.0086962 | 0.6209341 |
| Q5QHR8 | Pea15b   | -2.043138 | 1.6520549 | 0.2560691 | 0.8743196 | -0.551757 | 0.9311452 | 0.5751134 | 0.7015295 |
| P70296 | Pebp1    | 0.6371596 | 0.393059  | 0.1100066 | 0.8743196 | 0.9170272 | 0.4259703 | 0.0357373 | 0.6209341 |
| Q99MZ7 | Pecr     | -0.471054 | 0.5215754 | 0.3703919 | 0.8743196 | -0.320757 | 0.3480915 | 0.361412  | 0.6594641 |
| Q8BFY6 | Pef1     | -0.432495 | 0.8127991 | 0.6024458 | 0.8792876 | 0.7338638 | 0.6310887 | 0.265791  | 0.6500471 |
| Q8C669 | Peli1    | 0.0207814 | 0.6199496 | 0.9741948 | 0.9072902 | -0.118963 | 0.5642138 | 0.8399856 | 0.7524436 |
| P70264 | Pept1    | 0.3286784 | 1.4872749 | 0.8314052 | 0.8943678 | 0.4013907 | 1.8068691 | 0.8315679 | 0.7519044 |
| O35973 | Per1     | -0.050053 | 0.5941895 | 0.935226  | 0.9048359 | -0.281715 | 0.4200464 | 0.5273845 | 0.69337   |
| Q9Z210 | Pex11b   | -2.49731  | 3.1044212 | 0.4475998 | 0.8743196 | -3.523312 | 3.3241566 | 0.329976  | 0.6594641 |
| O09012 | Pex5     | 0.5029921 | 1.5404564 | 0.7535756 | 0.8923639 | 3.0425509 | 1.0343735 | 0.0258991 | 0.6209341 |
| Q99LC9 | Pex6     | 0.6879322 | 0.6138139 | 0.2993662 | 0.8743196 | -0.179432 | 0.5746515 | 0.7654208 | 0.7395427 |
| Q5SUR0 | Pfas     | -0.333556 | 0.4110543 | 0.4232867 | 0.8743196 | -0.0787   | 0.2256459 | 0.7299637 | 0.7324769 |
| Q9CWM4 | Pfdn1    | 0.3495013 | 0.3647911 | 0.3532081 | 0.8743196 | 0.0907968 | 0.3771927 | 0.8135289 | 0.7470412 |
| O70591 | Pfdn2    | -0.335723 | 0.4313568 | 0.4484982 | 0.8743196 | -0.301156 | 0.5180764 | 0.5709826 | 0.7003616 |
| Q9WU28 | Pfdn5    | 0.7574118 | 0.4433886 | 0.1313466 | 0.8743196 | -0.770543 | 0.6306582 | 0.2676012 | 0.6500471 |
| Q03958 | Pfdn6    | 1.077712  | 1.0312236 | 0.3307262 | 0.8743196 | 0.2304241 | 1.8245517 | 0.9036275 | 0.7610813 |
| P70266 | Pfkfb1   | 0.4660539 | 0.6125727 | 0.4544981 | 0.8743196 | -0.039629 | 0.783481  | 0.960161  | 0.7730074 |
| P70265 | Pfkfb2   | -2.057197 | 0.7290457 | 0.025708  | 0.8743196 | -3.410821 | 2.3668827 | 0.1996468 | 0.6429844 |
| P12382 | Pfkl     | -0.100751 | 0.503114  | 0.8425894 | 0.8956144 | -0.188518 | 0.6162692 | 0.7620252 | 0.7385106 |
| P47857 | Pfkm     | 0.3247305 | 0.2240525 | 0.1490295 | 0.8743196 | 0.3225159 | 0.2702103 | 0.2344922 | 0.6442378 |
| Q9WUA3 | Pfkp     | -0.630175 | 0.7810905 | 0.4323953 | 0.8743196 | -0.240067 | 0.8050387 | 0.7702591 | 0.7413356 |
| P62962 | Pfn1     | -0.538237 | 0.2131337 | 0.0137926 | 0.8743196 | -0.691055 | 0.3205931 | 0.0350083 | 0.6209341 |
| Q9JJV2 | Pfn2     | 0.0692258 | 0.5049475 | 0.8927789 | 0.9006736 | -0.379515 | 0.4252648 | 0.3883886 | 0.6611124 |
| Q9DBJ1 | Pgam1    | -0.407609 | 0.3764701 | 0.2830629 | 0.8743196 | 0.1387367 | 0.3967099 | 0.7278858 | 0.7323934 |
| O70250 | Pgam2    | -0.186454 | 0.2824028 | 0.5106958 | 0.8753373 | 0.3893164 | 0.2634668 | 0.1432814 | 0.6209341 |
| Q9DCD0 | Pgd      | 0.5010505 | 0.340806  | 0.1454812 | 0.8743196 | 0.1888421 | 0.3914406 | 0.6310286 | 0.7120542 |
| P49764 | Pgf      | -0.704314 | 0.7263561 | 0.364522  | 0.8743196 | -0.380128 | 0.3830927 | 0.3593853 | 0.6594641 |
| P09411 | Pgk1     | 0.2066672 | 0.1966824 | 0.2943305 | 0.8743196 | 0.1366875 | 0.1960626 | 0.486405  | 0.6799512 |
| P09041 | Pgk2     | -0.701498 | 0.8354912 | 0.4288599 | 0.8743196 | 0.2101707 | 0.6169443 | 0.744968  | 0.7359583 |
| Q9CQ60 | Pglis    | 0.1062618 | 0.3637001 | 0.7709236 | 0.8923639 | 0.5335681 | 0.3328465 | 0.1134929 | 0.6209341 |
| Q9D0F9 | Pgm1     | 0.2380976 | 0.1736695 | 0.1715151 | 0.8743196 | 0.2576952 | 0.1740194 | 0.1399769 | 0.6209341 |
| Q7TSV4 | Pgm2     | -0.254877 | 1.3959771 | 0.8603033 | 0.897347  | 1.450456  | 0.8781758 | 0.1496912 | 0.6209341 |
| Q9CYR6 | Pgm3     | 2.5746381 | 1.3069975 | 0.0610088 | 0.8743196 | 1.3872345 | 1.5051941 | 0.3677054 | 0.6594641 |
| Q8BVU7 | Pgm5     | -0.286965 | 1.3212015 | 0.8342472 | 0.8943678 | -0.302477 | 1.6514137 | 0.860703  | 0.7561118 |
| Q8BZF8 | Pgm5     | -0.622695 | 0.7489791 | 0.4143007 | 0.8743196 | -0.65075  | 0.4935701 | 0.2022515 | 0.6429844 |
| Q8CHP8 | Pgp      | -1.068913 | 0.3701102 | 0.0058428 | 0.8743196 | -0.46433  | 0.2853553 | 0.1113565 | 0.6209341 |
| Q00175 | Pgr      | 0.0283263 | 0.6143029 | 0.9645094 | 0.9067461 | -0.509866 | 0.8723499 | 0.5801975 | 0.7027314 |
| O55022 | Pgrmc1   | 0.2121252 | 0.2987722 | 0.4803304 | 0.8743196 | -0.00719  | 0.2549468 | 0.9776021 | 0.7762206 |
| Q80UU9 | Pgrmc2   | -0.216691 | 1.2002112 | 0.8618413 | 0.897347  | 0.5547284 | 1.299784  | 0.6844251 | 0.724036  |
| P67778 | Phb      | 0.2236414 | 0.3697991 | 0.5470687 | 0.8753373 | 0.7171219 | 0.3722909 | 0.0581947 | 0.6209341 |
| O35129 | Phb2     | 0.0305    | 0.3578071 | 0.9322851 | 0.9048359 | 0.4134114 | 0.3969832 | 0.3013332 | 0.6540599 |
| Q64028 | Phc1     | -0.160294 | 0.2833361 | 0.5892393 | 0.8753373 | -0.846108 | 0.3128747 | 0.0353729 | 0.6209341 |
| B2KFW6 | Phc2     | 0.351612  | 0.4197129 | 0.4298463 | 0.8743196 | -0.441946 | 0.2889674 | 0.1770357 | 0.6355136 |
| P70669 | Phex     | -0.665682 | 1.0544915 | 0.5479076 | 0.8753373 | -1.815211 | 1.152627  | 0.1663594 | 0.629443  |
| Q9Z1B8 | Phf1     | -0.474532 | 0.7244862 | 0.5223918 | 0.8753373 | -1.078048 | 1.0102007 | 0.3053165 | 0.6553142 |
| Q9D8M7 | Phf10    | -0.552811 | 0.5271683 | 0.3291938 | 0.8743196 | -0.612473 | 0.2598517 | 0.0565144 | 0.6209341 |
| Q6ZPI0 | Phf17    | -0.540204 | 0.707955  | 0.4703633 | 0.8743196 | -0.171288 | 0.8172917 | 0.8409307 | 0.7524932 |
| Q9WTU0 | Phf2     | 0.211654  | 0.4573127 | 0.6575362 | 0.8900083 | 0.0871254 | 0.3874691 | 0.8295522 | 0.7517136 |
| Q9D4J7 | Phf6     | -0.094132 | 0.2870655 | 0.7525683 | 0.8923639 | -0.536431 | 0.2218285 | 0.0519887 | 0.6209341 |
| Q8VDD9 | Phip     | 0.5070051 | 0.1670871 | 0.018997  | 0.8743196 | 0.3163521 | 0.1394947 | 0.0638566 | 0.6209341 |
| P18826 | Phka1    | -0.430836 | 0.1837371 | 0.051476  | 0.8743196 | -3.132965 | 1.4275055 | 0.0706147 | 0.6209341 |
| O08969 | Phlda2   | 2.0350421 | 1.8848474 | 0.3160728 | 0.8743196 | 2.0113523 | 2.1369899 | 0.3829308 | 0.6606339 |
| Q6PDH0 | Phldb1   | 0.0102575 | 0.3592606 | 0.9780191 | 0.9072902 | -0.744108 | 0.4699652 | 0.1644363 | 0.6276894 |
| Q8K1N2 | Phldb2   | -0.108677 | 0.1993903 | 0.6026458 | 0.8792876 | -0.229003 | 0.1068012 | 0.07571   | 0.6209341 |
| E9QAF4 | Phldb3   | 0.7542286 | 1.2150169 | 0.5544258 | 0.8753373 | 0.8893404 | 1.0933215 | 0.4470412 | 0.6699704 |
| Q8BXA7 | Phlpp2   | -1.141848 | 0.8420382 | 0.1951463 | 0.8743196 | 0.6214621 | 0.6692449 | 0.370017  | 0.6594641 |
| Q8R2H9 | Phospho1 | -1.129895 | 1.1731991 | 0.367585  | 0.8743196 | -1.901337 | 0.7256134 | 0.0395694 | 0.6209341 |
| Q9DAK9 | Phpt1    | -0.007028 | 0.1941697 | 0.9712583 | 0.9072902 | -0.524294 | 0.2178209 | 0.0199797 | 0.6209341 |
| Q9QZ09 | Phtf1    | -0.481423 | 0.3378791 | 0.1972266 | 0.8743196 | -0.290801 | 0.5300462 | 0.603057  | 0.7075832 |
| O35386 | Phyh     | -0.778379 | 0.7444754 | 0.3123304 | 0.8743196 | 0.6182842 | 0.6764818 | 0.3773726 | 0.6594641 |

|        |          |           |           |           |           |           |           |           |           |
|--------|----------|-----------|-----------|-----------|-----------|-----------|-----------|-----------|-----------|
| Q9DB26 | Phyhd1   | -0.090549 | 0.3966836 | 0.8225237 | 0.8943678 | 0.0079596 | 0.4453888 | 0.986013  | 0.7775007 |
| Q8CBQ5 | Pi4k2b   | -0.451595 | 1.6155976 | 0.7879232 | 0.8943678 | 0.6717081 | 1.7732611 | 0.7178797 | 0.7303836 |
| Q8BKC8 | Pi4kb    | 1.1861868 | 1.1002178 | 0.3167166 | 0.8743196 | 1.6390334 | 1.1232011 | 0.1947819 | 0.6418859 |
| Q9JM05 | Pias4    | 0.7975504 | 0.8978837 | 0.3884252 | 0.8743196 | -0.09698  | 1.1658778 | 0.9349738 | 0.7669305 |
| Q7M6Y3 | Picalm   | -0.085792 | 0.5258563 | 0.8718279 | 0.8990856 | 0.405882  | 0.4399163 | 0.367195  | 0.6594641 |
| Q80SX8 | Pif1     | -0.322646 | 1.1874906 | 0.7936886 | 0.8943678 | -0.544581 | 0.4820377 | 0.3017145 | 0.6540599 |
| Q64323 | Piga     | 0.2590009 | 0.8603472 | 0.7721276 | 0.8925825 | 0.5314686 | 0.4994583 | 0.3282256 | 0.6594641 |
| Q9JJQ0 | Pigb     | 0.079337  | 1.1628202 | 0.9475121 | 0.9060514 | 1.0722737 | 1.0337951 | 0.3396146 | 0.6594641 |
| Q5M9N4 | Pigh     | 1.0629003 | 1.5618988 | 0.5180447 | 0.8753373 | 2.067275  | 1.246351  | 0.1482561 | 0.6209341 |
| Q9QYT7 | Pigq     | -0.247058 | 0.9961967 | 0.811251  | 0.8943678 | 0.0323148 | 1.2448754 | 0.9801324 | 0.7762605 |
| O70570 | Pigr     | -0.372667 | 0.402055  | 0.3596767 | 0.8743196 | -0.923157 | 0.5229614 | 0.086503  | 0.6209341 |
| Q6PD26 | Pigs     | -0.533411 | 1.2937179 | 0.6924472 | 0.8900083 | 0.0700619 | 0.5596024 | 0.9044553 | 0.7612577 |
| Q8CHR9 | Pih1d2   | -0.562454 | 0.588204  | 0.3708095 | 0.8743196 | -1.04464  | 0.8636466 | 0.2719358 | 0.6500471 |
| Q9EQ32 | Pik3ap1  | 2.5245188 | 1.3226747 | 0.0979524 | 0.8743196 | 1.5121876 | 1.8383895 | 0.4422134 | 0.6699704 |
| Q6PF93 | Pik3c3   | -1.179907 | 1.4763418 | 0.4504315 | 0.8743196 | 0.5306711 | 0.7249422 | 0.4917486 | 0.6814973 |
| Q8BT19 | Pik3cb   | 0.2195663 | 0.5948117 | 0.7229391 | 0.8910745 | 0.170653  | 0.5239483 | 0.7557062 | 0.7380125 |
| O35904 | Pik3cd   | 1.3073626 | 1.4065342 | 0.383568  | 0.8743196 | 1.0807694 | 1.6013217 | 0.5248646 | 0.69337   |
| Q5SW28 | Pik3r5   | 0.3877381 | 0.2792177 | 0.185213  | 0.8743196 | 0.3500699 | 0.2531722 | 0.1900382 | 0.6405321 |
| Q9Z1T6 | Pikfyve  | 0.1517347 | 0.8380699 | 0.861457  | 0.897347  | 0.4739279 | 0.7439391 | 0.5476125 | 0.6980496 |
| Q9QUR7 | Pin1     | 0.907557  | 0.7649356 | 0.2538977 | 0.8743196 | 0.0625058 | 0.9928444 | 0.950759  | 0.7706093 |
| Q3TCV3 | Pion     | -1.285901 | 0.9030603 | 0.1974771 | 0.8743196 | -0.895111 | 1.1842222 | 0.4783452 | 0.6788349 |
| E0CYP4 | Pip5k1c  | -1.843829 | 1.3153361 | 0.2037272 | 0.8743196 | -0.807967 | 0.8790455 | 0.3934724 | 0.6617584 |
| Q9D826 | Pipox    | 0.6435709 | 0.2358937 | 0.0077031 | 0.8743196 | 0.1936053 | 0.3357887 | 0.5659346 | 0.6997388 |
| Q9D711 | Pir      | 0.2760243 | 0.4639471 | 0.5561966 | 0.8753373 | 0.0385419 | 0.5341928 | 0.9430145 | 0.7691222 |
| P53810 | Pitpna   | -0.432499 | 0.5828082 | 0.4636154 | 0.8743196 | -0.176683 | 0.5736602 | 0.7604518 | 0.7380771 |
| P53811 | Pitpnb   | -0.634947 | 0.8747927 | 0.4791183 | 0.8743196 | -1.268585 | 1.117968  | 0.276981  | 0.6500471 |
| Q8JZZ5 | Pitpnb   | -0.569378 | 0.9861573 | 0.5817752 | 0.8753373 | -1.46094  | 0.4454325 | 0.0168263 | 0.6209341 |
| O35954 | Pitpnm1  | 0.3325423 | 0.4206204 | 0.4414989 | 0.8743196 | -0.521282 | 0.5378397 | 0.3501259 | 0.6594641 |
| Q6ZPQ6 | Pitpnm2  | -1.37439  | 0.3617781 | 0.0067237 | 0.8743196 | -0.873585 | 0.7837077 | 0.307634  | 0.6559102 |
| Q8K411 | Pitrml   | 0.2775466 | 0.4486874 | 0.539793  | 0.8753373 | 0.4566332 | 0.4322071 | 0.2981826 | 0.6540599 |
| O55176 | Pja1     | -1.140659 | 0.8832231 | 0.2375461 | 0.8743196 | -0.793952 | 0.9250012 | 0.4236692 | 0.6694352 |
| O08852 | Pkd1     | -1.511302 | 0.9219893 | 0.1451853 | 0.8743196 | -0.663803 | 0.7757119 | 0.4249934 | 0.6694352 |
| Q7TN88 | Pkd1l2   | 0.8530109 | 1.5065518 | 0.5889404 | 0.8753373 | -1.260806 | 1.9849196 | 0.5487452 | 0.6980496 |
| Q5RJ14 | Pkdcc    | -0.205338 | 0.6590103 | 0.7644312 | 0.8923639 | -1.978511 | 0.7227429 | 0.0338475 | 0.6209341 |
| Q9Z0T6 | Pkdrej   | -0.351656 | 0.4947855 | 0.5002437 | 0.8753373 | -0.414631 | 0.6639049 | 0.5552659 | 0.6980496 |
| Q80ZA4 | Pkhd111  | 0.1260678 | 0.790941  | 0.8778634 | 0.9006736 | 0.8121043 | 0.6914374 | 0.2846879 | 0.6516893 |
| P63248 | Pkia     | 0.3095686 | 0.5183399 | 0.5592614 | 0.8753373 | -0.368303 | 0.6001739 | 0.5500269 | 0.6980496 |
| P53657 | Pklr     | -0.150744 | 0.2301058 | 0.5130298 | 0.8753373 | -0.001318 | 0.2141595 | 0.9950947 | 0.7793235 |
| P52480 | Pkm      | 0.2513926 | 0.1714638 | 0.1435011 | 0.8743196 | 0.1116429 | 0.1905535 | 0.5583816 | 0.6980496 |
| P70268 | Pkn1     | -0.691793 | 0.6013136 | 0.2679617 | 0.8743196 | -0.644095 | 0.3816667 | 0.1153219 | 0.6209341 |
| P97819 | Pla2g6   | -0.056125 | 0.2917317 | 0.8486956 | 0.8962775 | -0.192963 | 0.3596547 | 0.5959901 | 0.7056501 |
| P27612 | Plaa     | 0.0233372 | 0.3054705 | 0.9393449 | 0.9048359 | 0.3612114 | 0.269474  | 0.1856161 | 0.6405321 |
| Q9EPT3 | Plagl1   | 0.4668492 | 0.6452986 | 0.4928568 | 0.8748057 | 0.1902573 | 1.091454  | 0.8673506 | 0.7571111 |
| P11214 | Plat     | 1.3429005 | 1.238931  | 0.3143165 | 0.8743196 | 0.6272618 | 1.8976969 | 0.7522303 | 0.7375672 |
| Q3TTY0 | Plb1     | -0.130259 | 1.1914452 | 0.9160098 | 0.9048359 | 2.0010625 | 0.6768695 | 0.0254029 | 0.6209341 |
| A3KGF7 | Plcb2    | -1.581517 | 1.0868157 | 0.1889493 | 0.8743196 | -0.997593 | 1.3964065 | 0.5018146 | 0.6823283 |
| Q8K4S1 | Plce1    | 0.7211724 | 0.9294309 | 0.4631957 | 0.8743196 | 0.9575907 | 1.1605514 | 0.4408689 | 0.6699704 |
| Q4KWH5 | Plch1    | -0.469933 | 0.5585911 | 0.4134009 | 0.8743196 | 0.1206034 | 0.4059324 | 0.7710826 | 0.7417488 |
| A2AP17 | Plch2    | -0.170142 | 0.2919812 | 0.5783645 | 0.8753373 | -0.125729 | 0.0708305 | 0.1262343 | 0.6209341 |
| A2AP18 | Plch2    | -0.358522 | 0.5926299 | 0.5542434 | 0.8753373 | 0.1979362 | 0.521913  | 0.7106237 | 0.7288708 |
| Q9Z280 | Pld1     | -0.419869 | 0.5894463 | 0.4872052 | 0.8743196 | -0.755953 | 0.9582507 | 0.4443267 | 0.6699704 |
| Q8BG07 | Pld4     | -0.590977 | 0.2946531 | 0.0849063 | 0.8743196 | -1.564451 | 1.3830922 | 0.3011777 | 0.6540599 |
| Q9QXS1 | Plec     | -0.205358 | 0.2515056 | 0.4225817 | 0.8743196 | 0.0323405 | 0.2356053 | 0.8921934 | 0.7595603 |
| Q8CIA7 | Plekha5  | -0.472852 | 0.463992  | 0.3420806 | 0.8743196 | -0.1853   | 0.403223  | 0.6620215 | 0.7215904 |
| Q7TQG1 | Plekha6  | 1.071667  | 0.8531134 | 0.2493488 | 0.8743196 | 1.1039973 | 0.8484323 | 0.2409136 | 0.6491941 |
| Q91WB4 | Plekhh2  | -0.477454 | 0.8340095 | 0.5754773 | 0.8753373 | 0.7294731 | 0.5027289 | 0.1704725 | 0.6323131 |
| Q6KAU7 | Plekhhg2 | -0.458753 | 0.4240323 | 0.3151605 | 0.8743196 | -1.553475 | 0.8609307 | 0.1212094 | 0.6209341 |
| Q66T02 | Plekhhg5 | -0.709394 | 0.5163301 | 0.2118461 | 0.8743196 | -0.446057 | 0.4805226 | 0.389082  | 0.6611124 |
| Q8VCE9 | Plekhhh3 | 1.2198982 | 0.5735113 | 0.0709767 | 0.8743196 | 0.7562862 | 0.856481  | 0.4112069 | 0.6675611 |
| P20918 | Plg      | -0.015678 | 0.3207544 | 0.9614387 | 0.9067461 | -0.241791 | 0.2549945 | 0.3543346 | 0.6594641 |
| Q8CGN5 | Plin1    | 0.3697141 | 0.4774284 | 0.4507367 | 0.8743196 | 0.0759611 | 0.5847314 | 0.8986281 | 0.7608777 |

|        |           |           |           |           |           |           |           |           |           |
|--------|-----------|-----------|-----------|-----------|-----------|-----------|-----------|-----------|-----------|
| Q9DBG5 | Plin3     | 0.2224482 | 0.3458948 | 0.5228254 | 0.8753373 | 0.0998096 | 0.4044938 | 0.8061527 | 0.745845  |
| O88492 | Plin4     | -0.202572 | 0.4242244 | 0.6356635 | 0.8883187 | -0.14189  | 0.340397  | 0.6794189 | 0.7239064 |
| Q8BVZ1 | Plin5     | -1.219491 | 0.6975612 | 0.1239144 | 0.8743196 | -1.347182 | 1.4416652 | 0.38613   | 0.6611124 |
| Q07832 | Plk1      | -1.143724 | 0.6377345 | 0.0930883 | 0.8743196 | -0.769173 | 0.4780723 | 0.1316413 | 0.6209341 |
| Q60806 | Plk3      | 1.2911601 | 1.8957042 | 0.5176992 | 0.8753373 | 1.5102617 | 2.0841998 | 0.4959564 | 0.6823283 |
| P61014 | Pln       | 0.5088962 | 0.6982915 | 0.4897983 | 0.8743196 | -0.199853 | 0.693364  | 0.7828638 | 0.7436402 |
| Q3V0K9 | Pls1      | 0.3622221 | 0.6419193 | 0.5901777 | 0.8753373 | -0.435713 | 0.5176686 | 0.4322264 | 0.6694352 |
| Q99K51 | Pls3      | 0.1381044 | 0.3219553 | 0.6694192 | 0.8900083 | -0.153001 | 0.3451003 | 0.6592498 | 0.7209749 |
| P70208 | Plxna3    | 1.2987521 | 0.3265407 | 0.0053422 | 0.8743196 | -0.194209 | 0.4655441 | 0.6910716 | 0.724834  |
| Q9QZC2 | Plxnc1    | -0.139402 | 0.441323  | 0.7613093 | 0.8923639 | -0.216304 | 0.3172857 | 0.5208394 | 0.6929797 |
| Q3UH93 | Plxnd1    | 0.0184487 | 0.8328925 | 0.9829463 | 0.9077764 | 1.4013216 | 0.4971026 | 0.030395  | 0.6209341 |
| A3KG59 | Pm20d2    | -0.017501 | 0.5383653 | 0.974275  | 0.9072902 | 0.107235  | 0.6015201 | 0.8598392 | 0.7560112 |
| Q9Z2M7 | Pmm2      | -0.006504 | 0.4987362 | 0.9897082 | 0.9093077 | -0.251119 | 0.5638083 | 0.6608153 | 0.7211958 |
| Q9DC61 | Pmpca     | -0.192544 | 0.3360528 | 0.5708074 | 0.8753373 | -0.630537 | 0.4999125 | 0.2179921 | 0.6434585 |
| Q9CXT8 | Pmpcb     | -0.061298 | 0.3237636 | 0.8504437 | 0.8962775 | 0.0526694 | 0.3919077 | 0.893583  | 0.7595603 |
| P54279 | Pms2      | 0.7570735 | 0.8240222 | 0.3727626 | 0.8743196 | 1.1538536 | 0.7925621 | 0.169156  | 0.6323131 |
| Q8BHK0 | Pnma2     | -1.791608 | 1.4183291 | 0.2469689 | 0.8743196 | -1.207605 | 0.4365113 | 0.0325731 | 0.6209341 |
| P40935 | Pnmt      | 0.730082  | 0.9640953 | 0.4736017 | 0.8743196 | 1.5648662 | 1.0674806 | 0.1930201 | 0.6418859 |
| P23492 | Pnp       | 0.157915  | 0.2780379 | 0.5716715 | 0.8753373 | 0.1136702 | 0.277159  | 0.682984  | 0.7239064 |
| Q3V1D5 | Pnp1a1    | -0.121024 | 0.2034152 | 0.570595  | 0.8753373 | -0.338818 | 0.2406147 | 0.2087374 | 0.6429844 |
| Q3TRM4 | Pnp1a6    | -0.059581 | 0.2263242 | 0.799936  | 0.8943678 | -0.438846 | 0.2176709 | 0.0903876 | 0.6209341 |
| B0ZTC6 | Pnp1a7    | -0.90035  | 0.7568437 | 0.2729791 | 0.8743196 | 0.1982087 | 0.444183  | 0.6710821 | 0.7227095 |
| Q91XF0 | Pnpo      | 0.4104693 | 0.3261533 | 0.212849  | 0.8743196 | 0.2329678 | 0.3443074 | 0.5014782 | 0.6823283 |
| Q8K1R3 | Pnpt1     | 0.1579956 | 0.5967425 | 0.7947953 | 0.8943678 | 0.5089077 | 0.67805   | 0.4662945 | 0.6736081 |
| Q8VHI3 | Pofut2    | 2.5432034 | 1.4644732 | 0.1260321 | 0.8743196 | 3.9175107 | 1.3025554 | 0.0237753 | 0.6209341 |
| P33609 | Pola1     | -0.626382 | 1.09996   | 0.586845  | 0.8753373 | -0.790953 | 1.0003271 | 0.4592259 | 0.6712964 |
| Q9EQ28 | Pold3     | 0.7469694 | 0.9129279 | 0.4401954 | 0.8743196 | 0.8071883 | 0.8257604 | 0.3660682 | 0.6594641 |
| Q91VA6 | Poldip2   | 1.0863298 | 0.5485177 | 0.0881191 | 0.8743196 | 0.7578245 | 0.5674371 | 0.2301349 | 0.6442378 |
| P54099 | Polg      | 1.105632  | 0.6551197 | 0.1353299 | 0.8743196 | -0.199111 | 0.819153  | 0.816048  | 0.7474231 |
| Q8K202 | Polr1e    | 1.1431828 | 1.3728256 | 0.4324905 | 0.8743196 | 1.6562217 | 0.9734272 | 0.1397628 | 0.6209341 |
| P08775 | Polr2a    | -0.410029 | 0.4556241 | 0.3980588 | 0.8743196 | -0.253139 | 0.122727  | 0.0847485 | 0.6209341 |
| D3YYI2 | Polr2i    | 0.2722948 | 0.4211462 | 0.5385324 | 0.8753373 | -0.281032 | 0.5202544 | 0.6085218 | 0.7082928 |
| P59470 | Polr3b    | -0.53936  | 0.5718001 | 0.3769529 | 0.8743196 | -1.088134 | 0.5079145 | 0.075903  | 0.6209341 |
| Q9D2C6 | Polr3h    | -0.489191 | 0.7774118 | 0.5491584 | 0.8753373 | -1.253207 | 0.4654464 | 0.0359337 | 0.6209341 |
| Q8K3Z9 | Pom121    | 0.3403686 | 0.9148338 | 0.7208594 | 0.8910745 | 0.6638227 | 0.8710788 | 0.4748989 | 0.6774295 |
| Q5SW25 | Pom121l2  | -0.215345 | 0.1861815 | 0.2853617 | 0.8743196 | -0.303231 | 0.1158471 | 0.0397183 | 0.6209341 |
| Q8R2R1 | Pomt1     | 0.086948  | 0.3868013 | 0.8251782 | 0.8943678 | 0.2336847 | 0.4260485 | 0.5926485 | 0.7055393 |
| P52430 | Pon1      | -0.272935 | 0.2534419 | 0.2856263 | 0.8743196 | 0.0053504 | 0.2757754 | 0.9845912 | 0.7770957 |
| Q62087 | Pon3      | 0.0147065 | 0.3411546 | 0.9658919 | 0.9067656 | -0.220668 | 0.5324291 | 0.6818154 | 0.7239064 |
| P37040 | Por       | -0.331447 | 0.2125914 | 0.1216328 | 0.8743196 | -0.387138 | 0.2139357 | 0.0732464 | 0.6209341 |
| Q91WC1 | Pot1      | 1.5217422 | 0.9025396 | 0.1124652 | 0.8743196 | 1.304505  | 0.9942835 | 0.2122143 | 0.6429844 |
| Q62090 | Pou3f-rs1 | -0.355188 | 0.6450353 | 0.5989989 | 0.8772764 | 0.192468  | 0.9958715 | 0.8531271 | 0.7541624 |
| Q8BJI4 | Pou6f2    | -0.411106 | 0.7207186 | 0.5862339 | 0.8753373 | -0.494616 | 0.4896643 | 0.3514273 | 0.6594641 |
| Q9D819 | Ppa1      | -0.381536 | 0.226853  | 0.0945577 | 0.8743196 | -0.432113 | 0.3185315 | 0.1771148 | 0.6355136 |
| Q91VM9 | Ppa2      | -0.290853 | 0.3803966 | 0.4459252 | 0.8743196 | 0.8663767 | 0.304083  | 0.005226  | 0.6209341 |
| Q9D4F2 | Ppapdc2   | 1.004553  | 0.6855343 | 0.1634695 | 0.8743196 | 1.3284636 | 0.7023951 | 0.0810701 | 0.6209341 |
| P35396 | Ppard     | -0.022746 | 1.4757652 | 0.9881327 | 0.909     | 0.5910749 | 1.3996104 | 0.6875108 | 0.72435   |
| O70343 | Ppargc1a  | -0.38061  | 1.0109436 | 0.7177052 | 0.8910745 | 0.3914725 | 0.3582946 | 0.3164861 | 0.6594641 |
| Q8VDG5 | Ppcs      | -0.172391 | 0.3668115 | 0.6405493 | 0.8891711 | -0.028034 | 0.3991749 | 0.9443516 | 0.7692128 |
| P17742 | Ppia      | 0.4532519 | 0.3148693 | 0.1530435 | 0.8743196 | 0.4295151 | 0.3866645 | 0.2696042 | 0.6500471 |
| P24369 | Ppib      | 0.1840323 | 0.3429261 | 0.593185  | 0.8768692 | -0.456913 | 0.4314819 | 0.2937359 | 0.6532982 |
| Q9CR16 | Ppid      | -0.16681  | 0.5429066 | 0.7595501 | 0.8923639 | -0.30508  | 0.5162109 | 0.5566701 | 0.6980496 |
| Q99KR7 | Ppif      | 0.142685  | 0.4286594 | 0.7407178 | 0.8923639 | 0.1252452 | 0.4774772 | 0.794399  | 0.7439428 |
| A2AR02 | Ppig      | -1.184432 | 1.5640346 | 0.4735898 | 0.8743196 | 0.6338422 | 0.6352257 | 0.3568908 | 0.6594641 |
| Q9D0W5 | Ppil1     | -0.090765 | 0.21091   | 0.6798801 | 0.8900083 | -0.161043 | 0.1244362 | 0.2431803 | 0.6496933 |
| Q6ZQB6 | Ppip5k2   | -0.046995 | 0.402145  | 0.9102528 | 0.9048359 | -0.402789 | 0.3821356 | 0.3324452 | 0.6594641 |
| P49443 | Ppm1a     | 0.3784866 | 0.6931854 | 0.5903161 | 0.8753373 | 0.4623565 | 0.6872209 | 0.5087795 | 0.6853401 |
| P36993 | Ppm1b     | -0.377541 | 0.4214634 | 0.3772706 | 0.8743196 | -1.380559 | 0.7293928 | 0.0691576 | 0.6209341 |
| Q9QZ67 | Ppm1d     | -1.011942 | 0.9250743 | 0.3102051 | 0.8743196 | -0.237789 | 0.1377356 | 0.135022  | 0.6209341 |
| Q80TL0 | Ppm1e     | 1.5568298 | 1.2731675 | 0.2609721 | 0.8743196 | 1.2489732 | 1.2903777 | 0.3704681 | 0.6594641 |
| Q61074 | Ppm1g     | -0.5085   | 0.7949704 | 0.532051  | 0.8753373 | 0.645463  | 0.3999714 | 0.1305764 | 0.6209341 |

|        |          |           |           |           |           |           |           |           |           |
|--------|----------|-----------|-----------|-----------|-----------|-----------|-----------|-----------|-----------|
| Q8BXN7 | Ppm1k    | 0.6631119 | 0.6693353 | 0.3375441 | 0.8743196 | 1.1817149 | 0.7458029 | 0.1370981 | 0.6209341 |
| Q8BHN0 | Ppm1l    | 1.4794525 | 2.1950323 | 0.521938  | 0.8753373 | 2.7067333 | 2.3711765 | 0.2971575 | 0.6540599 |
| Q8BU27 | Ppm1m    | 0.7434113 | 1.034118  | 0.4955031 | 0.8748057 | 0.2274363 | 1.3602383 | 0.8727031 | 0.7574724 |
| Q8BGL1 | Ppm1n    | 0.3804723 | 0.664621  | 0.5849159 | 0.8753373 | -0.449746 | 0.6075998 | 0.4871205 | 0.6801934 |
| Q8BVQ5 | Ppme1    | 0.7724133 | 0.6645401 | 0.2831936 | 0.8743196 | 0.2350131 | 1.2980752 | 0.8622913 | 0.7561118 |
| P62137 | Ppp1ca   | 1.0715405 | 1.4754879 | 0.4912625 | 0.8743196 | 2.4356841 | 1.4790158 | 0.1506927 | 0.6209341 |
| P62141 | Ppp1cb   | -0.659055 | 1.0203173 | 0.538914  | 0.8753373 | -0.431596 | 0.8527528 | 0.6308256 | 0.7120542 |
| Q9DBR7 | Ppp1r12a | -0.811152 | 0.9005311 | 0.3976515 | 0.8743196 | -0.926071 | 1.4117312 | 0.5361648 | 0.695758  |
| Q8BG95 | Ppp1r12b | -0.612486 | 0.3436684 | 0.0879245 | 0.8743196 | -0.181146 | 0.2788101 | 0.523272  | 0.6929797 |
| Q62415 | Ppp1r13b | -0.606619 | 0.6711828 | 0.396136  | 0.8743196 | 0.5904244 | 0.6053158 | 0.3670321 | 0.6594641 |
| Q511X5 | Ppp1r13l | 0.9408972 | 0.4729124 | 0.0651898 | 0.8743196 | -1.388092 | 1.0115269 | 0.1931928 | 0.6418859 |
| P17564 | Ppp1r15a | 0.3314448 | 1.049318  | 0.7613131 | 0.8923639 | -1.043032 | 1.1078569 | 0.3827992 | 0.6606339 |
| Q8BQ30 | Ppp1r18  | 0.0917945 | 0.661709  | 0.8935753 | 0.9006736 | 0.6170291 | 0.6403913 | 0.3724966 | 0.6594641 |
| Q9DCL8 | Ppp1r2   | -0.402118 | 1.5485588 | 0.8025879 | 0.8943678 | 0.2986156 | 0.9540004 | 0.7648646 | 0.7395427 |
| Q3UM45 | Ppp1r7   | 0.1326026 | 0.3777545 | 0.7274561 | 0.891572  | 0.174949  | 0.5304288 | 0.7435552 | 0.7355992 |
| Q6R891 | Ppp1r9b  | -0.292144 | 1.1191638 | 0.8015767 | 0.8943678 | 0.0980327 | 1.4216894 | 0.947266  | 0.7699203 |
| P63330 | Ppp2ca   | -1.339379 | 2.3760296 | 0.5812856 | 0.8753373 | 0.0345967 | 2.2954003 | 0.9882035 | 0.7775007 |
| P62715 | Ppp2cb   | 0.0899253 | 0.4394452 | 0.840609  | 0.895241  | 0.1485051 | 0.3542514 | 0.6819082 | 0.7239064 |
| Q76MZ3 | Ppp2r1a  | 0.0297439 | 0.2569657 | 0.908117  | 0.9048359 | 0.0702182 | 0.2600474 | 0.7878761 | 0.7439428 |
| Q6P1F6 | Ppp2r2a  | -0.740062 | 0.5297597 | 0.182746  | 0.8743196 | -1.346548 | 0.6924949 | 0.0737962 | 0.6209341 |
| P58389 | Ppp2r4   | -0.315587 | 0.5313995 | 0.5712778 | 0.8753373 | -0.367975 | 0.6932497 | 0.6146229 | 0.7084882 |
| Q3TSR8 | Ppp2r5c  | -0.42285  | 0.3366594 | 0.2494054 | 0.8743196 | -0.570116 | 0.192451  | 0.0252046 | 0.6209341 |
| P63328 | Ppp3ca   | 0.0412216 | 0.84431   | 0.9624243 | 0.9067461 | -1.561858 | 1.3543821 | 0.2926945 | 0.6532982 |
| Q8K2V1 | Ppp4r1   | 0.4136625 | 0.4869883 | 0.4237376 | 0.8743196 | -0.536759 | 0.9555407 | 0.5946427 | 0.7056501 |
| Q60676 | Ppp5c    | 0.0689894 | 0.356143  | 0.8471144 | 0.8962775 | 0.0839571 | 0.3730334 | 0.8228835 | 0.7490596 |
| Q9CQR6 | Ppp6c    | 0.0117204 | 0.4819882 | 0.9809205 | 0.907495  | 0.224974  | 0.4024673 | 0.5856717 | 0.7049451 |
| Q7TSI3 | Ppp6r1   | 0.5254693 | 0.5240524 | 0.3493979 | 0.8743196 | -1.130693 | 0.7447543 | 0.1797608 | 0.6381812 |
| Q922D4 | Ppp6r3   | -0.777671 | 0.4789136 | 0.1484422 | 0.8743196 | -2.182407 | 1.404737  | 0.171271  | 0.6323131 |
| Q6NZN1 | Pprc1    | -0.846489 | 0.6601678 | 0.240589  | 0.8743196 | -0.925606 | 1.3622501 | 0.522176  | 0.6929797 |
| O88531 | Ppt1     | -0.238353 | 0.5234195 | 0.6553601 | 0.8900083 | -1.098379 | 0.5865453 | 0.0837815 | 0.6209341 |
| Q9JIG8 | Praf2    | 0.581609  | 1.234197  | 0.6517992 | 0.8900083 | 1.0694539 | 0.96548   | 0.3104136 | 0.6577795 |
| A2AJ77 | Prdm12   | -2.321617 | 2.7739704 | 0.4302746 | 0.8743196 | 2.5621021 | 0.8379993 | 0.0222991 | 0.6209341 |
| E9Q3T6 | Prdm14   | 0.7575658 | 0.6799224 | 0.3019842 | 0.8743196 | 0.4960116 | 0.7110996 | 0.5115825 | 0.6874741 |
| A2A935 | Prdm16   | -0.02062  | 0.7338038 | 0.9779527 | 0.9072902 | -0.43068  | 0.3612879 | 0.2545415 | 0.6500471 |
| P35700 | Prdx1    | -0.295568 | 0.2089696 | 0.1591043 | 0.8743196 | 0.0063588 | 0.17504   | 0.9710709 | 0.7751875 |
| Q61171 | Prdx2    | 0.4544093 | 0.3166498 | 0.154556  | 0.8743196 | 0.0957453 | 0.3764338 | 0.7998556 | 0.7439428 |
| P20108 | Prdx3    | -0.060803 | 0.2620139 | 0.8169531 | 0.8943678 | 0.0403549 | 0.2875812 | 0.8887166 | 0.7592752 |
| O08807 | Prdx4    | 0.2461639 | 0.3229742 | 0.4577717 | 0.8743196 | -0.160711 | 0.3145292 | 0.6179467 | 0.7091807 |
| P99029 | Prdx5    | -0.02944  | 0.2120642 | 0.8898604 | 0.9006736 | -0.112506 | 0.229434  | 0.6250706 | 0.7113805 |
| O08709 | Prdx6    | 0.1557674 | 0.2694444 | 0.5638735 | 0.8753373 | 0.2782361 | 0.2315439 | 0.2311983 | 0.6442378 |
| Q9QUR6 | Prep     | -0.105863 | 0.3006486 | 0.7254202 | 0.8910745 | 0.2804612 | 0.2600369 | 0.2834659 | 0.6508436 |
| Q69ZK0 | Prex1    | -0.16591  | 0.3219404 | 0.6092227 | 0.8792876 | -1.364506 | 0.6723436 | 0.0502956 | 0.6209341 |
| P10820 | Prf1     | 1.2834721 | 1.0810484 | 0.2738519 | 0.8743196 | 1.2348543 | 1.246367  | 0.3600591 | 0.6594641 |
| Q9JM99 | Prg4     | -0.586219 | 1.3270781 | 0.6720039 | 0.8900083 | 0.4972202 | 0.5036574 | 0.3616581 | 0.6594641 |
| Q283N4 | Prhoxnb  | -0.065019 | 0.3352983 | 0.8469574 | 0.8962775 | 0.0977374 | 0.3283743 | 0.7672621 | 0.7401549 |
| A7YQ68 | Prickle2 | -0.151905 | 0.3795428 | 0.7009182 | 0.8901989 | -0.128554 | 0.2108475 | 0.564419  | 0.6997388 |
| P33610 | Prim2    | -0.508286 | 0.6725288 | 0.4614838 | 0.8743196 | -0.591211 | 0.5361954 | 0.2901935 | 0.652142  |
| P05132 | Prkaca   | 0.304014  | 1.181731  | 0.8004724 | 0.8943678 | -0.084184 | 1.3274071 | 0.9503968 | 0.7706093 |
| P68181 | Prkacb   | -1.890373 | 0.8017567 | 0.0505053 | 0.8743196 | -2.599952 | 1.7687192 | 0.1919689 | 0.6418859 |
| O54950 | Prkag1   | 0.3033737 | 0.8581013 | 0.7340915 | 0.8923639 | 0.6540341 | 0.9499108 | 0.5168477 | 0.6910975 |
| Q9DBC7 | Prkar1a  | 0.2259215 | 0.4072923 | 0.581736  | 0.8753373 | 0.5414184 | 0.3966236 | 0.1796758 | 0.6381812 |
| P12367 | Prkar2a  | 0.2564413 | 0.3054173 | 0.404744  | 0.8743196 | -0.409839 | 0.4049368 | 0.3165624 | 0.6594641 |
| Q8K1M3 | Prkar2a  | 0.5874696 | 0.3113762 | 0.1011667 | 0.8743196 | 0.3773013 | 0.2959764 | 0.2495302 | 0.6500471 |
| P23298 | Prkch    | 0.1504612 | 0.9733072 | 0.8815093 | 0.9006736 | 0.3866629 | 1.0072724 | 0.7143087 | 0.7303836 |
| O08795 | Prkcsb   | -0.095048 | 0.2625394 | 0.7185395 | 0.8910745 | 0.0800772 | 0.2364025 | 0.7361012 | 0.7343797 |
| Q02956 | Prkcz    | 0.5023172 | 0.3152883 | 0.1551437 | 0.8743196 | -0.950842 | 1.0239703 | 0.3889346 | 0.6611124 |
| P0C605 | Prkg1    | 0.6375627 | 0.6992874 | 0.3922254 | 0.8743196 | 0.5598985 | 0.7792797 | 0.49947   | 0.6823283 |
| Q61410 | Prkg2    | 0.8900782 | 0.6550956 | 0.1943239 | 0.8743196 | 1.5382907 | 0.6625957 | 0.0371377 | 0.6209341 |
| Q9WTX2 | Prkra    | 0.7235861 | 0.4935882 | 0.1860834 | 0.8743196 | -0.080692 | 0.3476392 | 0.8241638 | 0.7492441 |
| O35257 | Prl6a1   | 1.4883531 | 1.323162  | 0.2977404 | 0.8743196 | 1.5575181 | 1.5424574 | 0.3515814 | 0.6594641 |
| Q8CGZ9 | Prl7b1   | -0.606515 | 0.6169496 | 0.3583151 | 0.8743196 | -0.305326 | 0.6507947 | 0.6555188 | 0.7198872 |

|        |         |           |           |           |           |           |           |           |           |
|--------|---------|-----------|-----------|-----------|-----------|-----------|-----------|-----------|-----------|
| Q9JIF0 | Prmt1   | 0.032167  | 0.8972609 | 0.9724027 | 0.9072902 | 0.4443762 | 1.0312935 | 0.6815966 | 0.7239064 |
| Q3U3W5 | Prmt10  | 1.6879552 | 0.6694488 | 0.0397285 | 0.8743196 | 0.8332774 | 1.1354709 | 0.4907042 | 0.6804142 |
| Q9WU79 | Prodh   | -0.760636 | 0.4652694 | 0.110132  | 0.8743196 | 0.1933945 | 0.2135682 | 0.3715521 | 0.6594641 |
| Q8VCZ9 | Prodh2  | -0.908794 | 0.6002791 | 0.1738068 | 0.8743196 | -2.574329 | 1.0286475 | 0.0463627 | 0.6209341 |
| Q14A28 | Prok1   | 0.4805713 | 0.6953961 | 0.5117773 | 0.8753373 | 0.4371824 | 0.5230161 | 0.4352359 | 0.6699704 |
| Q9Z2Y8 | Prosc   | 0.3996887 | 0.2980924 | 0.1838211 | 0.8743196 | -0.106455 | 0.3954254 | 0.7885669 | 0.7439428 |
| P05143 | Prp2    | 0.0098502 | 0.463324  | 0.9836317 | 0.9078335 | -0.054739 | 0.4278827 | 0.9023838 | 0.7610813 |
| Q922U1 | Prpf3   | 1.0374817 | 0.7756737 | 0.2228739 | 0.8743196 | -0.692651 | 1.0731712 | 0.5425308 | 0.6979269 |
| Q8CCF0 | Prpf31  | 0.5491268 | 0.5901841 | 0.3668802 | 0.8743196 | 0.0843437 | 0.8379557 | 0.9213608 | 0.7630855 |
| Q80SY5 | Prpf38b | -1.210084 | 0.9669405 | 0.2509675 | 0.8743196 | 0.1455639 | 0.4409601 | 0.7525406 | 0.7375672 |
| Q8K2Z2 | Prpf39  | -0.702066 | 0.7574063 | 0.3848059 | 0.8743196 | -0.762479 | 0.4277451 | 0.1249341 | 0.6209341 |
| Q9R1C7 | Prpf40a | -0.05573  | 0.5879609 | 0.927142  | 0.9048359 | -0.923775 | 0.6690965 | 0.2166205 | 0.6434585 |
| Q80W14 | Prpf40b | 0.3619542 | 0.5229086 | 0.5111163 | 0.8753373 | 0.0479186 | 0.3925214 | 0.9068227 | 0.7612577 |
| P15331 | Prph    | -0.196822 | 0.6021343 | 0.7533206 | 0.8923639 | -2.427184 | 1.8671449 | 0.2413231 | 0.6491941 |
| Q9D7G0 | Prps1   | -0.495784 | 0.5190512 | 0.3713045 | 0.8743196 | -0.370684 | 0.1781123 | 0.0826    | 0.6209341 |
| Q9CS42 | Prps2   | -0.261126 | 0.1842545 | 0.1993595 | 0.8743196 | -0.418196 | 0.3225692 | 0.2424463 | 0.6496933 |
| Q9D0M1 | Prpsap1 | 0.7035293 | 0.4333015 | 0.1125074 | 0.8743196 | 0.734224  | 0.4539312 | 0.1150166 | 0.6209341 |
| Q8JZM2 | Prp15l  | -0.30412  | 1.6920547 | 0.8624535 | 0.897347  | 3.2555064 | 0.6033693 | 0.0016709 | 0.5840626 |
| Q7TSC1 | Prrc2a  | -0.315484 | 0.7502862 | 0.6800931 | 0.8900083 | -0.704542 | 0.8062597 | 0.3980607 | 0.6622315 |
| Q3TLH4 | Prrc2c  | -4.085605 | 4.5766476 | 0.4016597 | 0.8743196 | 2.841028  | 5.0539632 | 0.5943833 | 0.7056501 |
| Q14B25 | Prss48  | -0.108505 | 0.6053887 | 0.8628332 | 0.897347  | -0.068151 | 0.6270525 | 0.9169962 | 0.7627031 |
| Q9ESD1 | Prss8   | 0.8218346 | 0.5133514 | 0.1534282 | 0.8743196 | 0.0061818 | 0.8212769 | 0.9942384 | 0.7793235 |
| Q8BIW1 | Prune   | -0.768629 | 1.0991485 | 0.506932  | 0.8753373 | -0.871815 | 1.7046055 | 0.6273089 | 0.7115945 |
| O55103 | Prx     | -0.389178 | 0.3164365 | 0.258471  | 0.8743196 | 0.0238796 | 0.3782535 | 0.9517127 | 0.7707046 |
| Q61207 | Psap    | 0.0820271 | 0.3666293 | 0.8244329 | 0.8943678 | -0.014882 | 0.3273914 | 0.9640792 | 0.7733493 |
| Q6P1I6 | Psd2    | 0.5087897 | 1.0240182 | 0.6345127 | 0.8878094 | -0.200149 | 1.8215606 | 0.9160894 | 0.7627031 |
| Q2PFD7 | Psd3    | 2.0251057 | 0.6687569 | 0.0191642 | 0.8743196 | 0.3213216 | 1.2112008 | 0.799664  | 0.7439428 |
| Q62056 | Psg17   | -0.645139 | 0.4065046 | 0.1333554 | 0.8743196 | -0.404988 | 0.2637103 | 0.1485786 | 0.6209341 |
| Q99JF8 | Psip1   | -0.197397 | 0.2483916 | 0.452884  | 0.8743196 | -0.066777 | 0.1206209 | 0.5998504 | 0.7062306 |
| Q9R1P4 | Psma1   | -0.174903 | 0.2100873 | 0.4073909 | 0.8743196 | -0.122903 | 0.213872  | 0.5672201 | 0.6997388 |
| P49722 | Psma2   | -0.16565  | 0.2573324 | 0.5224328 | 0.8753373 | -0.62869  | 0.3191788 | 0.0546568 | 0.6209341 |
| O70435 | Psma3   | -0.199998 | 0.2565597 | 0.4395712 | 0.8743196 | -0.236598 | 0.343355  | 0.4946569 | 0.6823283 |
| Q9R1P0 | Psma4   | -0.206145 | 0.3290651 | 0.5346659 | 0.8753373 | 0.4242648 | 0.3294571 | 0.2065227 | 0.6429844 |
| Q9Z2U1 | Psma5   | -0.409302 | 0.2906944 | 0.1657069 | 0.8743196 | -0.080273 | 0.3118662 | 0.7981611 | 0.7439428 |
| Q9QUM9 | Psma6   | -0.218269 | 0.3032137 | 0.4746638 | 0.8743196 | 0.1350103 | 0.2577706 | 0.6028546 | 0.7075832 |
| Q9Z2U0 | Psma7   | 1.7896696 | 0.3741707 | 0.0020052 | 0.8743196 | 1.4321743 | 0.5180807 | 0.032664  | 0.6209341 |
| O09061 | Psemb1  | 0.2310035 | 0.6329804 | 0.7184862 | 0.8910745 | 0.3872191 | 0.6683168 | 0.5687925 | 0.6997388 |
| Q9R1P3 | Psemb2  | -0.230614 | 0.6177852 | 0.7114717 | 0.8910745 | -0.182161 | 0.456185  | 0.6928034 | 0.7253631 |
| Q9R1P1 | Psemb3  | 0.2153165 | 0.6500577 | 0.7450554 | 0.8923639 | 0.6681749 | 0.8578003 | 0.4499624 | 0.6703439 |
| P99026 | Psemb4  | -1.11993  | 0.4711623 | 0.0224589 | 0.8743196 | -0.3647   | 0.3272713 | 0.2729383 | 0.6500471 |
| O55234 | Psemb5  | 0.5229156 | 0.4223345 | 0.2249536 | 0.8743196 | 0.5242784 | 0.4116473 | 0.213657  | 0.6429844 |
| Q60692 | Psemb6  | -0.276567 | 0.4785808 | 0.5660975 | 0.8753373 | 0.2774657 | 0.4092858 | 0.5016265 | 0.6823283 |
| P70195 | Psemb7  | -0.054549 | 0.5279167 | 0.9183682 | 0.9048359 | 0.7741082 | 0.4314098 | 0.0839602 | 0.6209341 |
| P28063 | Psemb8  | -1.716748 | 1.0003345 | 0.129838  | 0.8743196 | -1.664547 | 0.2988322 | 0.0014194 | 0.5840626 |
| P62192 | Psmc1   | 0.2249069 | 0.2152713 | 0.2980009 | 0.8743196 | 0.0324425 | 0.2700245 | 0.9045713 | 0.7612577 |
| P46471 | Psmc2   | -0.040256 | 0.2288977 | 0.8606603 | 0.897347  | 0.2518626 | 0.2228191 | 0.260623  | 0.6500471 |
| O88685 | Psmc3   | 0.5814774 | 0.3044515 | 0.0591605 | 0.8743196 | 0.6522086 | 0.3536617 | 0.0687278 | 0.6209341 |
| O35047 | Psmc3ip | 0.8203103 | 0.8185324 | 0.3496374 | 0.8743196 | -0.374316 | 1.7596236 | 0.8385845 | 0.7519044 |
| P54775 | Psmc4   | 0.74384   | 0.3741541 | 0.0502694 | 0.8743196 | 0.4389288 | 0.3988517 | 0.274947  | 0.6500471 |
| P62196 | Psmc5   | 0.2848726 | 0.2386379 | 0.2355506 | 0.8743196 | 0.0367186 | 0.2830205 | 0.8970874 | 0.7606804 |
| P62334 | Psmc6   | 0.030661  | 0.3383043 | 0.928073  | 0.9048359 | -0.002967 | 0.2981139 | 0.9920951 | 0.7788076 |
| Q3TXS7 | Psmc1   | -0.031538 | 0.2278439 | 0.8901036 | 0.9006736 | 0.0031537 | 0.2393687 | 0.9895092 | 0.7779037 |
| Q8BG32 | Psmc11  | 0.0163884 | 0.2175404 | 0.9401066 | 0.9048359 | 0.1497449 | 0.2670339 | 0.5764643 | 0.7017063 |
| Q9D8W5 | Psmc12  | 0.2170074 | 0.2103182 | 0.3061082 | 0.8743196 | -0.464602 | 0.4402923 | 0.2959415 | 0.6540599 |
| Q9WVJ2 | Psmc13  | 0.2757703 | 0.3506062 | 0.4349197 | 0.8743196 | 0.1427641 | 0.3384357 | 0.6750285 | 0.7239064 |
| O35593 | Psmc14  | -0.112138 | 0.3743207 | 0.76609   | 0.8923639 | 0.3250171 | 0.2076938 | 0.1268708 | 0.6209341 |
| Q8VDM4 | Psmc2   | -0.048728 | 0.2327936 | 0.8345564 | 0.8943678 | -0.176334 | 0.2359787 | 0.4566017 | 0.6712964 |
| P14685 | Psmc3   | 0.8582638 | 0.4429427 | 0.0550364 | 0.8743196 | 0.3869414 | 0.4725618 | 0.4147634 | 0.6675611 |
| O35226 | Psmc4   | 0.1700694 | 0.4006852 | 0.673177  | 0.8900083 | 0.0043479 | 0.4387353 | 0.9921411 | 0.7788076 |
| Q8BJY1 | Psmc5   | 1.304084  | 0.8743267 | 0.1794493 | 0.8743196 | 1.0836312 | 0.6875918 | 0.1661011 | 0.629443  |
| Q99J14 | Psmc6   | -0.64492  | 0.2677848 | 0.0183543 | 0.8743196 | -0.792522 | 0.3175971 | 0.0149785 | 0.6209341 |

|        |           |           |           |           |           |           |           |           |           |
|--------|-----------|-----------|-----------|-----------|-----------|-----------|-----------|-----------|-----------|
| P26516 | Psmid7    | 0.188175  | 0.5819002 | 0.7485788 | 0.8923639 | 0.2738823 | 0.4283809 | 0.5279875 | 0.69337   |
| Q9CX56 | Psmid8    | -0.927626 | 0.854427  | 0.283162  | 0.8743196 | -0.776637 | 0.8656666 | 0.3748742 | 0.6594641 |
| Q9CR00 | Psmid9    | 1.2835461 | 0.7098846 | 0.0783063 | 0.8743196 | 1.0072511 | 0.7820301 | 0.2064449 | 0.6429844 |
| P97371 | Psme1     | -0.335469 | 0.3130728 | 0.2880161 | 0.8743196 | -0.021239 | 0.2578768 | 0.9346583 | 0.7669305 |
| P97372 | Psme2     | -0.395868 | 0.7114671 | 0.5811085 | 0.8753373 | -0.363073 | 0.5102479 | 0.4815899 | 0.6796099 |
| Q5SSW2 | Psme4     | 1.4562747 | 0.7441216 | 0.0912168 | 0.8743196 | 0.1051656 | 1.7088554 | 0.9529267 | 0.7710241 |
| Q9TNN6 | Psors1c2  | -0.457564 | 0.6885991 | 0.527655  | 0.8753373 | -0.742144 | 0.4311655 | 0.1359892 | 0.6209341 |
| Q922A4 | Psrc1     | -0.117048 | 0.3816295 | 0.76799   | 0.8923639 | -1.833685 | 1.5689115 | 0.2868294 | 0.6518056 |
| Q9D0P7 | Psrc1     | -0.519516 | 1.0601659 | 0.6390952 | 0.8883187 | 0.9880296 | 1.0027343 | 0.3625103 | 0.6594641 |
| P17225 | Ptbp1     | 0.0796386 | 0.5052245 | 0.8768506 | 0.9006736 | -0.728778 | 0.6561345 | 0.2868128 | 0.6518056 |
| Q61115 | Ptch1     | -0.740759 | 0.6349214 | 0.2615479 | 0.8743196 | -0.675563 | 0.6951898 | 0.348901  | 0.6594641 |
| B9EKX1 | Ptchd4    | 1.0044791 | 0.627294  | 0.1533466 | 0.8743196 | -0.66533  | 0.69527   | 0.3755509 | 0.6594641 |
| Q9Z1X2 | Ptdss2    | -0.35173  | 1.0129889 | 0.738631  | 0.8923639 | 0.46502   | 1.0235074 | 0.6655576 | 0.7215904 |
| Q60866 | Pter      | -0.163491 | 0.7103879 | 0.8200147 | 0.8943678 | -0.211733 | 0.4017878 | 0.6040057 | 0.7079483 |
| Q9R0Q7 | Ptges3    | 0.1975504 | 0.4739694 | 0.67911   | 0.8900083 | 0.4634893 | 0.3539205 | 0.1991166 | 0.6429844 |
| Q91YR9 | Ptgr1     | 0.0146604 | 0.3683276 | 0.9687755 | 0.9072902 | -2.373289 | 0.7089308 | 0.0052438 | 0.6209341 |
| Q8VDQ1 | Ptgr2     | 0.0633656 | 0.6313477 | 0.920285  | 0.9048359 | 0.5445529 | 0.6120212 | 0.3764018 | 0.6594641 |
| Q05769 | Ptgs2     | -0.433179 | 1.3379793 | 0.7555811 | 0.8923639 | -0.282733 | 1.0646803 | 0.799469  | 0.7439428 |
| Q91V95 | Pth2r     | 0.7267129 | 1.1684576 | 0.5536888 | 0.8753373 | -0.331459 | 1.7459957 | 0.8556944 | 0.7553078 |
| P34152 | Ptk2      | 0.593924  | 0.5009411 | 0.2744554 | 0.8743196 | -0.968205 | 0.643065  | 0.1828771 | 0.6395902 |
| P26350 | Ptma      | -0.104514 | 0.4070701 | 0.7987236 | 0.8943678 | -0.46992  | 0.5254884 | 0.3774733 | 0.6594641 |
| Q9D0J8 | Ptms      | -0.086628 | 0.4794853 | 0.8575637 | 0.897347  | -0.478314 | 0.6057076 | 0.4351883 | 0.6699704 |
| Q8K2C9 | ptplad1   | 1.732737  | 0.9580235 | 0.1134375 | 0.8743196 | 2.6075533 | 0.8384043 | 0.0208452 | 0.6209341 |
| A2AKM2 | Ptplad2   | -0.65188  | 0.8618043 | 0.4740847 | 0.8743196 | 0.1195959 | 0.4192213 | 0.7850208 | 0.7439428 |
| P35821 | Ptpn1     | 2.5367307 | 1.1409872 | 0.0615787 | 0.8743196 | 1.4814907 | 1.2228396 | 0.2712419 | 0.6500471 |
| P35235 | Ptpn11    | -0.446405 | 0.3924249 | 0.2610728 | 0.8743196 | -0.138976 | 0.4088547 | 0.735656  | 0.734268  |
| Q64512 | Ptpn13    | 1.0159906 | 0.8687132 | 0.2804649 | 0.8743196 | 0.9413434 | 0.9369065 | 0.3538092 | 0.6594641 |
| Q06180 | Ptpn2     | -0.02825  | 0.3068013 | 0.9292143 | 0.9048359 | -0.884299 | 0.3555427 | 0.0473426 | 0.6209341 |
| Q6PB44 | Ptpn23    | -0.488768 | 0.9693978 | 0.6214472 | 0.8826986 | 0.8642975 | 0.8462915 | 0.3257537 | 0.6594641 |
| P29351 | Ptpn6     | -2.022267 | 1.270586  | 0.155501  | 0.8743196 | -0.331228 | 0.4007354 | 0.4401162 | 0.6699704 |
| B2RU80 | Ptprb     | -0.047882 | 0.6224956 | 0.9408401 | 0.9048359 | 0.4332804 | 0.6858182 | 0.5508329 | 0.6980496 |
| P06800 | Ptprc     | -0.894449 | 0.7359964 | 0.2430382 | 0.8743196 | 0.545504  | 0.6442124 | 0.412437  | 0.6675611 |
| A2A8L5 | Ptprf     | 0.0590963 | 0.498895  | 0.9072793 | 0.9048359 | -0.233564 | 0.418166  | 0.5859654 | 0.7049451 |
| Q05909 | Ptprg     | 0.6584279 | 0.6842344 | 0.3679617 | 0.8743196 | -0.743733 | 0.9937155 | 0.4824926 | 0.6796099 |
| Q64455 | Ptprij    | -0.77545  | 1.2978441 | 0.5689957 | 0.8753373 | -0.125935 | 0.8749339 | 0.890263  | 0.7593423 |
| P35822 | Ptpnk     | 0.380441  | 0.3702803 | 0.3384008 | 0.8743196 | -0.071504 | 0.4562108 | 0.8805952 | 0.7585208 |
| E9Q612 | Ptpro     | -0.33579  | 1.0520155 | 0.7539861 | 0.8923639 | 0.9415408 | 0.5277603 | 0.0977643 | 0.6209341 |
| Q62132 | Ptprr     | 1.367069  | 0.7163196 | 0.0979789 | 0.8743196 | -0.37788  | 1.7591227 | 0.8370292 | 0.7519044 |
| Q99M80 | Ptprr     | -0.112525 | 0.4458383 | 0.8079899 | 0.8943678 | -0.134107 | 0.4549699 | 0.7781091 | 0.7428116 |
| O54724 | Ptrf      | -0.426143 | 0.5668686 | 0.4559498 | 0.8743196 | -0.418911 | 0.3668371 | 0.2600993 | 0.6500471 |
| Q8R143 | Pttg1ip   | -0.193892 | 0.6584963 | 0.7769567 | 0.8940257 | 0.1798188 | 0.3682776 | 0.642689  | 0.7162065 |
| P42669 | Pura      | -0.574647 | 0.4509517 | 0.212028  | 0.8743196 | -0.70202  | 0.407478  | 0.096354  | 0.6209341 |
| O35295 | Purb      | 1.2381763 | 0.7932042 | 0.1624966 | 0.8743196 | 1.2681078 | 0.8507025 | 0.1866402 | 0.6405321 |
| Q9WU56 | Pus1      | 0.629792  | 1.2844952 | 0.6389131 | 0.8883187 | 1.0824717 | 1.0226889 | 0.3305873 | 0.6594641 |
| Q9D3U0 | Pus10     | -0.743791 | 1.3428136 | 0.5968854 | 0.8770074 | -0.45884  | 1.0099319 | 0.6655656 | 0.7215904 |
| Q8CE46 | Pus7l     | 0.0829961 | 0.2408516 | 0.7405206 | 0.8923639 | 0.1304136 | 0.1586129 | 0.4423968 | 0.6699704 |
| Q60977 | Pvr       | 0.8352531 | 1.0046979 | 0.4332165 | 0.8743196 | 2.0698389 | 1.0239791 | 0.0897302 | 0.6209341 |
| Q8R007 | Pvrl4     | 1.9501022 | 1.8294676 | 0.32183   | 0.8743196 | 1.2847265 | 2.3803583 | 0.6088218 | 0.7082928 |
| Q99LL5 | Pwp1      | -0.232038 | 0.3672837 | 0.5476086 | 0.8753373 | -0.348936 | 0.160715  | 0.0729463 | 0.6209341 |
| Q9DCC4 | Pyclr     | 0.5111588 | 0.412677  | 0.2554004 | 0.8743196 | -0.036698 | 0.6818386 | 0.9588245 | 0.7724743 |
| Q8CI94 | Pygb      | 0.2122591 | 0.183438  | 0.2483426 | 0.8743196 | 0.3808868 | 0.1808812 | 0.0363829 | 0.6209341 |
| Q9ET01 | Pygl      | 0.0250751 | 0.1509713 | 0.8681927 | 0.898064  | -0.075793 | 0.1897882 | 0.6899434 | 0.724834  |
| Q9WUB3 | Pygm      | -0.023218 | 0.1366762 | 0.8652077 | 0.8975219 | 0.0583938 | 0.1313152 | 0.6568763 | 0.7199612 |
| Q3TMV7 | Pyroxd1   | -1.506311 | 1.3336148 | 0.2959033 | 0.8743196 | 1.0037406 | 1.1119916 | 0.401494  | 0.6629633 |
| Q9D1C3 | Pyurf     | -2.183885 | 1.8806161 | 0.263683  | 0.8743196 | 0.4943476 | 0.5780134 | 0.4078977 | 0.6657745 |
| Q8BV14 | Qdpr      | 0.254983  | 0.1861343 | 0.1731392 | 0.8743196 | 0.2846927 | 0.2146483 | 0.1874558 | 0.6405321 |
| Q91X91 | Qprt      | -0.231908 | 0.2248147 | 0.3051407 | 0.8743196 | -0.529729 | 0.2698792 | 0.0533249 | 0.6209341 |
| Q8BSI6 | R3hcc1    | 0.3100235 | 0.5117112 | 0.5637308 | 0.8753373 | -0.220476 | 0.564069  | 0.7093978 | 0.7287989 |
| P61027 | Rab10     | -0.175747 | 0.5727568 | 0.7631806 | 0.8923639 | -0.828258 | 0.94138   | 0.3949227 | 0.6617584 |
| Q9D620 | Rab11fip1 | -0.306241 | 0.3740053 | 0.4398742 | 0.8743196 | -0.251043 | 0.1808574 | 0.2144609 | 0.6429844 |
| Q8BQP8 | Rab11fip4 | 0.0233716 | 1.4605804 | 0.9876797 | 0.9087734 | 0.872239  | 0.9422839 | 0.390333  | 0.6611124 |

|        |           |           |           |           |           |           |           |           |           |
|--------|-----------|-----------|-----------|-----------|-----------|-----------|-----------|-----------|-----------|
| Q8R361 | Rab11fip5 | -0.342566 | 0.3471139 | 0.3565693 | 0.8743196 | 0.049729  | 0.3371946 | 0.8875854 | 0.7592752 |
| Q91V41 | Rab14     | 0.0738157 | 0.3915739 | 0.8510145 | 0.8962775 | -1.68E-05 | 0.2671354 | 0.9999502 | 0.7807034 |
| Q8K386 | Rab15     | 0.6711178 | 0.7383746 | 0.3936131 | 0.8743196 | -2.508245 | 1.6640766 | 0.1824588 | 0.6395902 |
| P35293 | Rab18     | -0.097919 | 0.4201272 | 0.8169263 | 0.8943678 | 0.1417621 | 0.2976086 | 0.636881  | 0.7137275 |
| P62821 | Rab1A     | -0.778487 | 0.8392612 | 0.3583614 | 0.8743196 | -0.303804 | 0.8815086 | 0.732126  | 0.7326734 |
| Q9D1G1 | Rab1b     | -0.068397 | 0.7718687 | 0.9305628 | 0.9048359 | -0.305836 | 0.8871184 | 0.7357941 | 0.734268  |
| P35282 | Rab21     | -0.798311 | 0.7664165 | 0.3140887 | 0.8743196 | -0.517198 | 0.9890647 | 0.6098295 | 0.7082928 |
| Q9ERI2 | Rab27a    | -0.354926 | 0.588216  | 0.5552622 | 0.8753373 | 0.2702664 | 0.2368414 | 0.2744023 | 0.6500471 |
| P53994 | Rab2a     | -0.46632  | 1.2219353 | 0.7062431 | 0.8910745 | -1.879525 | 1.6011502 | 0.2542409 | 0.6500471 |
| O35963 | Rab33b    | 0.7149851 | 1.5343298 | 0.6553738 | 0.8900083 | -0.286439 | 1.6729924 | 0.869684  | 0.7571111 |
| Q6PHN9 | Rab35     | 0.0159105 | 0.6049322 | 0.9793637 | 0.9073888 | 0.4293276 | 0.4356016 | 0.3423203 | 0.6594641 |
| Q80UJ7 | Rab3gap1  | -0.7743   | 0.5157691 | 0.1540455 | 0.8743196 | -1.411685 | 0.579995  | 0.0301063 | 0.6209341 |
| Q8BMG7 | Rab3gap2  | -0.588082 | 0.6225788 | 0.3598361 | 0.8743196 | -0.910381 | 0.7087458 | 0.2213866 | 0.6437885 |
| Q0PD08 | Rab42     | -0.10418  | 0.5811459 | 0.8628067 | 0.897347  | -2.492641 | 1.9714338 | 0.252988  | 0.6500471 |
| Q9CY53 | Rab43     | 0.7318313 | 0.6021038 | 0.2635897 | 0.8743196 | 0.8441776 | 0.4823993 | 0.1306985 | 0.6209341 |
| P35278 | Rab5c     | 0.1410701 | 0.7851802 | 0.8598195 | 0.897347  | 0.0976007 | 0.4588644 | 0.8348596 | 0.7519044 |
| P51150 | Rab7a     | 0.1366009 | 0.3962451 | 0.732619  | 0.8923639 | 0.2769437 | 0.4016312 | 0.496363  | 0.6823283 |
| Q8VEA8 | Rab7b     | 0.1543017 | 0.8824922 | 0.8661491 | 0.898064  | -1.10247  | 1.4172943 | 0.4662022 | 0.6736081 |
| P53612 | Rabggtb   | 0.6681269 | 0.6868036 | 0.3460768 | 0.8743196 | 0.3213704 | 0.7661535 | 0.6817291 | 0.7239064 |
| P63001 | Rac1      | 0.2493811 | 1.3431591 | 0.857971  | 0.897347  | 0.8847343 | 1.0583295 | 0.4351914 | 0.6699704 |
| Q6NXW6 | Rad17     | -0.015355 | 1.3695317 | 0.9913674 | 0.909535  | 0.7383996 | 1.2923797 | 0.5885095 | 0.7049451 |
| P54726 | Rad23a    | -0.212226 | 0.5087821 | 0.6824958 | 0.8900083 | -0.638841 | 0.6802976 | 0.3648208 | 0.6594641 |
| P54728 | Rad23b    | 0.166297  | 0.2428807 | 0.4964175 | 0.8748057 | -0.055367 | 0.3731232 | 0.8826581 | 0.7585208 |
| P70388 | Rad50     | 1.3824367 | 0.5584886 | 0.0425006 | 0.8743196 | -0.347755 | 1.239302  | 0.7884372 | 0.7439428 |
| Q924H5 | Rad51c    | 0.4927275 | 0.251106  | 0.0905219 | 0.8743196 | -0.193873 | 0.6670681 | 0.7811155 | 0.7434726 |
| Q69Z89 | Radil     | -0.035861 | 0.799345  | 0.9654699 | 0.9067461 | -0.707955 | 0.4035504 | 0.1299126 | 0.6209341 |
| Q61818 | Rai1      | -0.338854 | 0.481109  | 0.4864919 | 0.8743196 | -0.634635 | 0.7520868 | 0.4061775 | 0.6648623 |
| Q9EP71 | Rai14     | 0.1679039 | 0.7423805 | 0.8275316 | 0.8943678 | -2.615611 | 1.2305507 | 0.0776842 | 0.6209341 |
| F6QC68 | Ralb      | -0.900597 | 0.5445504 | 0.1421376 | 0.8743196 | -0.877088 | 1.2411163 | 0.5062607 | 0.6838296 |
| A3KGS3 | Ralgapa2  | -0.631781 | 1.0749937 | 0.5751893 | 0.8753373 | 0.4019481 | 0.416305  | 0.3715746 | 0.6594641 |
| Q03385 | Ralgds    | 0.9833545 | 1.0554205 | 0.3824931 | 0.8743196 | 0.2427449 | 1.1922137 | 0.8453894 | 0.753234  |
| P62827 | Ran       | 0.2885592 | 1.0086284 | 0.7763229 | 0.8940257 | 0.6043677 | 1.051306  | 0.5691619 | 0.6997388 |
| P34022 | Ranbp1    | -0.098633 | 0.4745774 | 0.8362578 | 0.8943678 | 0.3673652 | 0.4558583 | 0.424964  | 0.6694352 |
| Q6VN19 | Ranbp10   | -0.214631 | 0.5417279 | 0.7037588 | 0.8910745 | -0.589583 | 0.3960697 | 0.1871683 | 0.6405321 |
| Q9ERU9 | Ranbp2    | -0.018007 | 0.4160903 | 0.9660513 | 0.9067656 | -0.870088 | 0.4008657 | 0.0490798 | 0.6209341 |
| Q9CT10 | Ranbp3    | -0.093365 | 1.1860842 | 0.9394606 | 0.9048359 | -0.304654 | 1.5244735 | 0.848205  | 0.7536454 |
| P46061 | Rangap1   | -1.532474 | 0.727966  | 0.0733122 | 0.8743196 | -0.640338 | 1.1543381 | 0.5991372 | 0.7061107 |
| Q9D019 | Rars      | 0.0568916 | 0.3002487 | 0.8502014 | 0.8962775 | -0.134195 | 0.2901997 | 0.645234  | 0.7175625 |
| Q3U186 | Rars2     | -0.309245 | 0.9184204 | 0.7462018 | 0.8923639 | -3.599919 | 0.916329  | 0.0077249 | 0.6209341 |
| Q9Z268 | Rasal1    | -1.303611 | 0.6231571 | 0.0747549 | 0.8743196 | -1.205697 | 0.6137865 | 0.0971065 | 0.6209341 |
| Q8C2K5 | Rasal3    | 1.7841564 | 0.8793389 | 0.0820368 | 0.8743196 | 1.5330173 | 0.8790587 | 0.1317922 | 0.6209341 |
| P27671 | Rasgrf1   | -0.167697 | 0.5813032 | 0.7813316 | 0.8940257 | -1.359972 | 0.8892863 | 0.1770628 | 0.6355136 |
| Q8BTM9 | Rasgrp4   | 0.5613136 | 0.5660267 | 0.3543906 | 0.8743196 | -0.929101 | 1.574047  | 0.5765541 | 0.7017063 |
| Q3U0S6 | Rasip1    | 1.356257  | 1.036429  | 0.2319985 | 0.8743196 | 1.0936786 | 1.2949616 | 0.4307356 | 0.6694352 |
| Q922H7 | Rasl11b   | -0.138644 | 0.4299147 | 0.7564984 | 0.8923639 | -0.255729 | 0.324181  | 0.460226  | 0.6712964 |
| P13405 | Rb1       | 0.2191925 | 1.2097389 | 0.8613532 | 0.897347  | -0.167734 | 1.0242314 | 0.875293  | 0.7581089 |
| P97868 | Rbbp6     | 0.0466052 | 0.4532304 | 0.9209825 | 0.9048359 | -0.959993 | 0.5761605 | 0.1467259 | 0.6209341 |
| O88851 | Rbbp9     | -0.102852 | 1.0335071 | 0.9235173 | 0.9048359 | 0.8297424 | 0.9727294 | 0.4263916 | 0.6694352 |
| Q6P3B9 | Rbfa      | -0.4135   | 1.0195328 | 0.697163  | 0.8900083 | 0.1398746 | 0.9234663 | 0.8845719 | 0.7586148 |
| Q8R1Q9 | Rbks      | 0.5228419 | 0.5097547 | 0.3391774 | 0.8743196 | 0.5595274 | 0.3229126 | 0.1338448 | 0.6209341 |
| Q64701 | Rbl1      | -0.259927 | 0.6589681 | 0.7049937 | 0.8910745 | 0.0461634 | 0.3498972 | 0.8993495 | 0.7608777 |
| Q64700 | Rbl2      | -0.784826 | 0.9272235 | 0.4253023 | 0.8743196 | -1.110227 | 2.0367453 | 0.6053396 | 0.7082928 |
| Q99KG3 | Rbm10     | -0.570882 | 0.8831107 | 0.5386009 | 0.8753373 | -2.673698 | 2.2764891 | 0.2847001 | 0.6516893 |
| Q3UQS8 | Rbm20     | -1.937488 | 0.7455098 | 0.0354831 | 0.8743196 | -0.569289 | 0.2549902 | 0.0670266 | 0.6209341 |
| B2RY56 | Rbm25     | 4.2730281 | 4.6335522 | 0.3871087 | 0.8743196 | 8.830857  | 3.4679553 | 0.0437012 | 0.6209341 |
| Q5SFM8 | Rbm27     | -0.537655 | 0.4502476 | 0.2713175 | 0.8743196 | -0.21245  | 0.3081914 | 0.5163644 | 0.6910282 |
| O89086 | Rbm3      | -0.865351 | 1.0054467 | 0.4179244 | 0.8743196 | -0.026813 | 0.2096929 | 0.9024326 | 0.7610813 |
| Q8VH51 | Rbm39     | 0.3450265 | 0.933442  | 0.7225882 | 0.8910745 | -0.846254 | 0.7691313 | 0.3133867 | 0.6594641 |
| Q3V089 | Rbm44     | 1.7030699 | 0.8155986 | 0.0751781 | 0.8743196 | 1.6207107 | 1.0379912 | 0.1694549 | 0.6323131 |
| Q00915 | Rbp1      | -0.508581 | 0.7885238 | 0.5394966 | 0.8753373 | 0.2695997 | 0.681094  | 0.7059197 | 0.7280735 |
| Q00724 | Rbp4      | -0.370213 | 0.4477305 | 0.4146323 | 0.8743196 | 0.5002444 | 0.2920328 | 0.0981798 | 0.6209341 |

|        |         |           |           |           |           |           |           |           |           |
|--------|---------|-----------|-----------|-----------|-----------|-----------|-----------|-----------|-----------|
| Q9EPC5 | Rbp7    | -0.357281 | 1.7767203 | 0.8463464 | 0.8962775 | -0.208227 | 1.0402319 | 0.8479568 | 0.7536454 |
| P31266 | Rbpj    | -0.541402 | 0.5179686 | 0.3124643 | 0.8743196 | -0.264942 | 0.1717289 | 0.1468662 | 0.6209341 |
| P62878 | Rbx1    | -1.500117 | 1.4660206 | 0.340241  | 0.8743196 | -0.527099 | 1.251719  | 0.6883495 | 0.72435   |
| Q8BP92 | Rcn2    | -0.949848 | 1.1866205 | 0.4497503 | 0.8743196 | -0.864493 | 0.4248626 | 0.0880814 | 0.6209341 |
| Q6PGA0 | Rcor3   | -0.855705 | 0.6167687 | 0.2078836 | 0.8743196 | -0.612153 | 0.2994927 | 0.0869653 | 0.6209341 |
| Q3UZA1 | Rcsd1   | 0.6131145 | 0.8008786 | 0.4558206 | 0.8743196 | -0.684175 | 1.2309036 | 0.587765  | 0.7049451 |
| Q9QYF1 | Rdh11   | 0.5493538 | 0.6367038 | 0.4018272 | 0.8743196 | 1.1812305 | 0.7348112 | 0.1319438 | 0.6209341 |
| O88451 | Rdh7    | 0.1737258 | 0.2872902 | 0.5468168 | 0.8753373 | -0.075588 | 0.3304518 | 0.8196316 | 0.7482226 |
| P26043 | Rdx     | -0.121848 | 0.3417571 | 0.7219972 | 0.8910745 | -0.153289 | 0.3792118 | 0.6867743 | 0.7242619 |
| Q75NR7 | Recql4  | -0.661497 | 0.7306166 | 0.379569  | 0.8743196 | -1.182977 | 0.541731  | 0.0479094 | 0.6209341 |
| Q8K072 | Reep4   | 0.1925544 | 0.9844037 | 0.8504761 | 0.8962775 | 0.5974588 | 0.5108303 | 0.2865228 | 0.6518056 |
| Q60870 | Reep5   | 0.088872  | 0.5716755 | 0.8785323 | 0.9006736 | 0.5856574 | 0.6489869 | 0.383251  | 0.6606339 |
| Q9JM62 | Reep6   | -1.204953 | 1.330313  | 0.3793789 | 0.8743196 | 1.3767822 | 0.6055081 | 0.0405849 | 0.6209341 |
| Q60841 | Reln    | 0.3619584 | 0.887827  | 0.6956815 | 0.8900083 | -0.565142 | 1.2101821 | 0.6569837 | 0.7199612 |
| Q8BX43 | Relt    | -0.378596 | 1.3352043 | 0.7849589 | 0.8943678 | 0.2666738 | 0.9870226 | 0.7960745 | 0.7439428 |
| E9Q4D5 | Rem2    | 1.122422  | 1.3041686 | 0.4179355 | 0.8743196 | 0.8416596 | 1.4733112 | 0.5885591 | 0.7049451 |
| Q8VEL9 | Rem2    | 0.8044639 | 0.7566616 | 0.322998  | 0.8743196 | -0.396384 | 0.723659  | 0.6036279 | 0.7078714 |
| Q9CQU3 | Reer1   | 0.0892391 | 1.4406182 | 0.9523383 | 0.9060514 | 1.3614688 | 0.9478628 | 0.2009229 | 0.6429844 |
| Q99P87 | Retn    | 0.1254665 | 0.5571713 | 0.8282682 | 0.8943678 | -0.592846 | 0.5503192 | 0.3227518 | 0.6594641 |
| Q64FW2 | Retsat  | 0.3098393 | 0.3594829 | 0.3953595 | 0.8743196 | -0.080918 | 0.4323839 | 0.8529469 | 0.7541624 |
| Q920Q2 | Rev1    | 0.2888344 | 0.6706134 | 0.6796361 | 0.8900083 | 0.2170873 | 0.807842  | 0.7971424 | 0.7439428 |
| Q61493 | Rev3l   | 1.5608811 | 1.3650196 | 0.2904309 | 0.8743196 | 2.6712375 | 1.1230132 | 0.0548703 | 0.6209341 |
| Q8BTA1 | Rexo1   | 0.3768704 | 0.5793327 | 0.5361128 | 0.8753373 | 0.3965009 | 0.7915514 | 0.6342722 | 0.7132198 |
| Q9D8S4 | Rexo2   | -0.98683  | 0.7608908 | 0.2142474 | 0.8743196 | 0.0942721 | 0.3968598 | 0.8159367 | 0.7474231 |
| P35601 | Rfc1    | -0.956966 | 1.3216574 | 0.4925088 | 0.8748057 | 0.0989647 | 0.3882407 | 0.8073082 | 0.745845  |
| Q6ZQM0 | Rffl    | 2.1745357 | 1.182451  | 0.1085029 | 0.8743196 | 1.1832724 | 2.2835319 | 0.6228808 | 0.7107949 |
| Q8CFV9 | Rfk     | 0.3829077 | 0.7453721 | 0.6232657 | 0.8826986 | -0.537474 | 0.8082433 | 0.5307712 | 0.6939525 |
| Q32KG4 | Rgag1   | 0.4608442 | 0.6744206 | 0.5163774 | 0.8753373 | 1.0535492 | 0.7304301 | 0.1992934 | 0.6429844 |
| Q61193 | Rgl2    | -0.13616  | 0.305775  | 0.6695511 | 0.8900083 | -0.687683 | 0.6312874 | 0.3178128 | 0.6594641 |
| Q3UYI5 | Rgl3    | 0.696104  | 0.7107952 | 0.3600421 | 0.8743196 | -3.315379 | 2.0830215 | 0.1625756 | 0.6273856 |
| Q64374 | Rgn     | 0.1076225 | 0.2341148 | 0.6464397 | 0.8896469 | -0.00016  | 0.2574763 | 0.9995055 | 0.7805379 |
| Q8BHT7 | Rgp1    | -0.265101 | 0.7772626 | 0.7430592 | 0.8923639 | -0.08255  | 0.724546  | 0.9130074 | 0.7626807 |
| Q9CQE5 | Rgs10   | 0.5268355 | 0.4035758 | 0.2330168 | 0.8743196 | -0.099431 | 0.6839173 | 0.8891686 | 0.7592752 |
| B7ZCT1 | Rgs19   | 0.5626498 | 0.5361293 | 0.3288397 | 0.8743196 | 0.3711147 | 1.002286  | 0.7239017 | 0.730562  |
| E9Q720 | Rgs20   | 1.4018264 | 0.7098725 | 0.0888658 | 0.8743196 | 0.0480271 | 0.8145933 | 0.9548999 | 0.7716385 |
| Q9Z2H2 | Rgs6    | 0.1694265 | 0.3935486 | 0.6797693 | 0.8900083 | 0.3406273 | 0.2760295 | 0.2633339 | 0.6500471 |
| O54828 | Rgs9    | -0.544334 | 0.6533613 | 0.432276  | 0.8743196 | -1.341381 | 0.5495218 | 0.0504034 | 0.6209341 |
| Q8CF94 | Rhd     | -0.213558 | 0.3434222 | 0.5537437 | 0.8753373 | -0.314234 | 0.2284651 | 0.2181456 | 0.6434585 |
| Q9QUI0 | Rhoa    | -0.110835 | 1.1388434 | 0.9237587 | 0.9048359 | 0.3758195 | 1.0422169 | 0.7241929 | 0.7306346 |
| Q91V93 | Rhobtb2 | -0.312876 | 0.3710338 | 0.4269573 | 0.8743196 | -0.002834 | 0.5378568 | 0.9959666 | 0.7793849 |
| Q6QI06 | Rictor  | 2.6954927 | 2.3947908 | 0.2974555 | 0.8743196 | 2.2152044 | 2.7584132 | 0.4525632 | 0.6712964 |
| Q6PR54 | Rif1    | 0.2124644 | 0.2958757 | 0.4959652 | 0.8748057 | -0.423062 | 0.507743  | 0.4366258 | 0.6699704 |
| Q9EQZ7 | Rims2   | -0.46145  | 0.528397  | 0.4114534 | 0.8743196 | 0.2170683 | 0.5037354 | 0.6815792 | 0.7239064 |
| Q8BZ36 | Rint1   | 1.8014531 | 1.6326771 | 0.3063459 | 0.8743196 | 1.2422917 | 1.8336764 | 0.5233471 | 0.6929797 |
| Q922Q2 | Riok1   | 2.3437685 | 3.0445716 | 0.4665863 | 0.8743196 | 3.2879445 | 3.3985101 | 0.3706738 | 0.6594641 |
| Q9CQS5 | Riok2   | -1.611167 | 1.2492501 | 0.2381251 | 0.8743196 | -2.213371 | 0.9931418 | 0.0673904 | 0.6209341 |
| Q60855 | Ripk1   | 0.8599239 | 0.5505506 | 0.1622744 | 0.8743196 | 0.864836  | 0.6127915 | 0.207846  | 0.6429844 |
| Q9WTV7 | Rlim    | -0.501287 | 0.7705161 | 0.5360759 | 0.8753373 | -0.384445 | 0.2874992 | 0.2296172 | 0.6442378 |
| Q3UPE3 | Rmi2    | 0.0161866 | 0.316502  | 0.960641  | 0.9067461 | -0.509954 | 0.4231452 | 0.2735155 | 0.6500471 |
| Q05921 | Rnasel  | 0.1026485 | 0.2711719 | 0.7162509 | 0.8910745 | -0.774173 | 0.6408195 | 0.2724607 | 0.6500471 |
| Q9CQ01 | Rnasel2 | -0.876578 | 0.6163945 | 0.1979871 | 0.8743196 | -0.57221  | 0.269013  | 0.0775225 | 0.6209341 |
| Q9R1W3 | Rnf103  | -1.323414 | 1.9332317 | 0.5156392 | 0.8753373 | 1.5994233 | 0.9001127 | 0.1259133 | 0.6209341 |
| Q9QYK7 | Rnf11   | -1.897549 | 1.3163917 | 0.1926485 | 0.8743196 | 0.6223687 | 0.6450687 | 0.3718997 | 0.6594641 |
| Q9ET26 | Rnf114  | 0.3260947 | 0.6834459 | 0.6401445 | 0.8891711 | -0.447169 | 0.8056156 | 0.5882746 | 0.7049451 |
| Q5XPI3 | Rnf123  | -0.59648  | 0.4004139 | 0.1799276 | 0.8743196 | -0.574555 | 0.2544129 | 0.064694  | 0.6209341 |
| Q14B02 | Rnf133  | -0.57487  | 0.3372831 | 0.1320787 | 0.8743196 | -0.620654 | 0.4167602 | 0.1870027 | 0.6405321 |
| Q5DTZ6 | Rnf150  | 1.2149011 | 0.6957349 | 0.1242778 | 0.8743196 | -0.134307 | 0.9280902 | 0.8896758 | 0.7592752 |
| Q99MV7 | Rnf17   | 0.8333107 | 0.5839846 | 0.1740814 | 0.8743196 | 1.0487127 | 0.6966719 | 0.1561476 | 0.6211692 |
| Q9CY62 | Rnf181  | -0.501287 | 0.7705161 | 0.5360759 | 0.8753373 | -0.384445 | 0.2874992 | 0.2296172 | 0.6442378 |
| P50636 | Rnf19a  | -1.978975 | 0.9067676 | 0.0654037 | 0.8743196 | -1.777505 | 1.7541928 | 0.3500261 | 0.6594641 |
| E9Q555 | Rnf213  | 0.0974229 | 0.4296217 | 0.8220958 | 0.8943678 | 0.4860769 | 0.4370532 | 0.2758706 | 0.6500471 |

|        |         |           |           |           |           |           |           |           |           |
|--------|---------|-----------|-----------|-----------|-----------|-----------|-----------|-----------|-----------|
| P58283 | Rnf216  | 0.0914901 | 0.433983  | 0.8390372 | 0.8951804 | 0.1236874 | 0.6316942 | 0.8512276 | 0.7537615 |
| Q8K2Y0 | Rnf219  | -0.839263 | 0.6057487 | 0.208439  | 0.8743196 | -2.229318 | 1.2574805 | 0.1266245 | 0.6209341 |
| Q2TA95 | Rnf26   | -0.882473 | 1.0367084 | 0.4228044 | 0.8743196 | -0.217927 | 0.4650098 | 0.6558621 | 0.7198872 |
| Q3U319 | Rnf40   | 0.231207  | 0.6799995 | 0.738563  | 0.8923639 | -0.151643 | 0.5920279 | 0.8018502 | 0.7441443 |
| Q9WZ1  | Rnf7    | 1.0456332 | 5.0593226 | 0.8421471 | 0.8955988 | 2.5404062 | 5.0857634 | 0.635203  | 0.7134626 |
| Q3UF64 | Rnft2   | -0.775695 | 1.4917744 | 0.6191111 | 0.8816934 | 0.9696995 | 1.3431466 | 0.4974778 | 0.6823283 |
| Q91VI7 | Rnh1    | 0.0173525 | 0.1796313 | 0.9231372 | 0.9048359 | 0.2142658 | 0.1805076 | 0.2367762 | 0.6452071 |
| Q9D0L8 | Rnmt    | 0.4357121 | 0.9468105 | 0.6593337 | 0.8900083 | 0.8665432 | 0.9510679 | 0.3973557 | 0.6617584 |
| Q8VCT3 | Rnppep  | -0.84991  | 0.3303879 | 0.0133172 | 0.8743196 | -0.901087 | 0.4698266 | 0.0621053 | 0.6209341 |
| O89026 | Robo1   | 1.7325438 | 0.8967686 | 0.0946453 | 0.8743196 | 0.8523847 | 1.1397766 | 0.4828201 | 0.6796099 |
| Q9Z2I4 | Robo3   | 0.7860649 | 0.4224657 | 0.08251   | 0.8743196 | 0.6364835 | 0.3996813 | 0.1352913 | 0.6209341 |
| Q8C310 | Robo4   | 0.2687352 | 0.678979  | 0.6978301 | 0.8900083 | 0.2313946 | 0.5527493 | 0.6823238 | 0.7239064 |
| P51448 | Rora    | 1.0336419 | 1.2779301 | 0.4452233 | 0.8743196 | 1.7728197 | 1.2371452 | 0.2018401 | 0.6429844 |
| Q78DX7 | Ros1    | -0.023455 | 0.2503833 | 0.9279917 | 0.9048359 | -0.237146 | 0.192432  | 0.2639113 | 0.6500471 |
| Q9EPK2 | Rp2     | -0.115598 | 0.1435038 | 0.4470045 | 0.8743196 | -0.151689 | 0.0719346 | 0.0795149 | 0.6209341 |
| Q8VEE4 | Rpa1    | -2.261414 | 0.8450015 | 0.0317123 | 0.8743196 | -0.871512 | 0.502009  | 0.1332363 | 0.6209341 |
| Q8VEE0 | Rpe     | -0.00455  | 0.3907337 | 0.9908624 | 0.909535  | -0.295253 | 0.6062261 | 0.6343433 | 0.7132198 |
| Q9R0X5 | Rpgpr   | -0.521412 | 0.7869273 | 0.5287969 | 0.8753373 | 0.4286879 | 0.8920786 | 0.6478561 | 0.7179029 |
| Q9EPQ2 | Rpgrip1 | -0.888057 | 0.4993614 | 0.1185744 | 0.8743196 | -2.153432 | 1.7275605 | 0.2590325 | 0.6500471 |
| Q768S4 | Rph3al  | -1.675523 | 1.2559431 | 0.2020811 | 0.8743196 | -0.129634 | 0.7614514 | 0.8674381 | 0.7571111 |
| P47968 | Rpia    | 0.1202252 | 0.2852996 | 0.6794396 | 0.8900083 | -0.637094 | 0.5494063 | 0.2670658 | 0.6500471 |
| Q6ZWV3 | Rpl10   | 0.1783926 | 0.4962379 | 0.7242392 | 0.8910745 | 0.2702997 | 0.6857548 | 0.6998498 | 0.7266885 |
| P53026 | Rpl10a  | -0.514298 | 0.424608  | 0.2330962 | 0.8743196 | -0.25177  | 0.396505  | 0.529697  | 0.6933955 |
| Q9CXW4 | Rpl11   | 0.2755318 | 0.6814698 | 0.6897127 | 0.8900083 | -0.019155 | 0.6534283 | 0.9769048 | 0.7762206 |
| P35979 | Rpl12   | 0.2323087 | 0.2397758 | 0.335905  | 0.8743196 | 0.1369877 | 0.2573946 | 0.5964833 | 0.7056501 |
| P47963 | Rpl13   | 0.0361215 | 0.2486527 | 0.8848347 | 0.9006736 | -0.239072 | 0.3189288 | 0.4558033 | 0.6712964 |
| P19253 | Rpl13a  | 0.4526627 | 0.2708547 | 0.1013211 | 0.8743196 | 0.4999829 | 0.2662776 | 0.0675517 | 0.6209341 |
| Q9CR57 | Rpl14   | 0.1139936 | 0.6562587 | 0.8629979 | 0.897347  | 0.1595338 | 0.5677428 | 0.7804159 | 0.7434254 |
| Q9CZM2 | Rpl15   | -0.135668 | 0.4398045 | 0.7597855 | 0.8923639 | -0.353633 | 0.586041  | 0.551261  | 0.6980496 |
| Q9CPR4 | Rpl17   | -0.768903 | 0.7511652 | 0.3139397 | 0.8743196 | 0.3763137 | 0.6113963 | 0.5433791 | 0.6979269 |
| A1LOT4 | Rpl18   | 0.390426  | 0.3228959 | 0.2658597 | 0.8743196 | 0.0713049 | 0.3657763 | 0.8518725 | 0.7537615 |
| P35980 | Rpl18   | 0.3339797 | 0.4082509 | 0.4217095 | 0.8743196 | -0.394787 | 0.4994065 | 0.4385028 | 0.6699704 |
| P62717 | Rpl18a  | 0.1023207 | 0.3944923 | 0.79648   | 0.8943678 | 0.0507858 | 0.4576837 | 0.9121873 | 0.7624298 |
| P84099 | Rpl19   | 0.203137  | 0.2706508 | 0.4566648 | 0.8743196 | -0.147993 | 0.2690817 | 0.5853072 | 0.7049451 |
| O09167 | Rpl21   | 0.0681094 | 0.4682041 | 0.885282  | 0.9006736 | 0.0964917 | 0.5819973 | 0.8695542 | 0.7571111 |
| P67984 | Rpl22   | -0.496946 | 0.5066361 | 0.3342484 | 0.8743196 | 0.0060004 | 0.3163107 | 0.9850045 | 0.7770959 |
| P62830 | Rpl23   | 0.2704986 | 0.4885669 | 0.5829739 | 0.8753373 | 0.2873313 | 0.4434724 | 0.5213932 | 0.6929797 |
| P62751 | Rpl23a  | 0.1603488 | 0.3693469 | 0.6661722 | 0.8900083 | 0.3212973 | 0.3338186 | 0.3414457 | 0.6594641 |
| Q8BP67 | Rpl24   | 0.2250833 | 0.4417149 | 0.6119351 | 0.8792876 | 0.333156  | 0.4249511 | 0.4360329 | 0.6699704 |
| P61255 | Rpl26   | -0.154509 | 0.4161461 | 0.7118513 | 0.8910745 | 0.0411543 | 0.4044106 | 0.9193681 | 0.7627031 |
| P61358 | Rpl27   | 0.5460759 | 0.3434093 | 0.1198734 | 0.8743196 | 0.294796  | 0.392814  | 0.4581329 | 0.6712964 |
| P14115 | Rpl27a  | -0.898709 | 0.6847388 | 0.2023039 | 0.8743196 | 0.2401965 | 0.4364422 | 0.5881733 | 0.7049451 |
| P41105 | Rpl28   | -0.260105 | 0.4113381 | 0.5308562 | 0.8753373 | 0.0603377 | 0.3006614 | 0.842142  | 0.752567  |
| P47915 | Rpl29   | -0.805609 | 0.4872968 | 0.1118725 | 0.8743196 | -0.348573 | 0.5353435 | 0.5223799 | 0.6929797 |
| P27659 | Rpl3    | -0.063341 | 0.2292947 | 0.7828423 | 0.8940257 | 0.1261928 | 0.2145041 | 0.5576061 | 0.6980496 |
| P62889 | Rpl30   | 0.1224931 | 0.3590473 | 0.7345026 | 0.8923639 | -0.153824 | 0.3773249 | 0.6856374 | 0.724036  |
| P62900 | Rpl31   | -0.295728 | 0.7317461 | 0.6898433 | 0.8900083 | 0.4442472 | 0.8503663 | 0.6071178 | 0.7082928 |
| P62911 | Rpl32   | -0.627431 | 1.124986  | 0.594412  | 0.8770074 | -0.927639 | 0.641392  | 0.1982367 | 0.6429844 |
| Q9D1R9 | Rpl34   | 0.3316068 | 0.4336063 | 0.4501947 | 0.8743196 | 0.3228945 | 0.5233506 | 0.5424192 | 0.6979269 |
| Q6ZWV7 | Rpl35   | 0.0748502 | 0.4632141 | 0.8737861 | 0.8998386 | 0.3094404 | 0.326082  | 0.359947  | 0.6594641 |
| O55142 | Rpl35a  | 0.2793412 | 0.2575023 | 0.2835389 | 0.8743196 | -0.004169 | 0.2996627 | 0.9889667 | 0.7777952 |
| P47964 | Rpl36   | -1.105033 | 1.1995613 | 0.3875933 | 0.8743196 | -1.514847 | 1.2142165 | 0.2586647 | 0.6500471 |
| P83882 | Rpl36a  | -0.276792 | 0.3379662 | 0.4177673 | 0.8743196 | -0.565974 | 0.4531012 | 0.2201558 | 0.6434585 |
| Q9D823 | Rpl37   | 0.4736472 | 0.2686123 | 0.1212148 | 0.8743196 | -0.544819 | 0.4211882 | 0.2433915 | 0.6496933 |
| P61514 | Rpl37a  | 0.3446879 | 1.3628802 | 0.8025834 | 0.8943678 | -0.819812 | 1.7044436 | 0.635747  | 0.713543  |
| Q9JL8  | Rpl38   | -0.609147 | 1.0031077 | 0.552761  | 0.8753373 | 0.7882874 | 0.5808625 | 0.1978459 | 0.6429844 |
| Q9D8E6 | Rpl4    | 0.236331  | 0.3373012 | 0.4850995 | 0.8743196 | 0.2892845 | 0.3394821 | 0.3964012 | 0.6617584 |
| P47962 | Rpl5    | -0.418922 | 0.296581  | 0.1617287 | 0.8743196 | -0.107941 | 0.2449639 | 0.6608507 | 0.7211958 |
| P47911 | Rpl6    | -0.484669 | 0.2297627 | 0.0375366 | 0.8743196 | -0.423733 | 0.2072271 | 0.0440458 | 0.6209341 |
| P14148 | Rpl7    | 0.1398124 | 0.2414525 | 0.5643899 | 0.8753373 | -0.320401 | 0.2678362 | 0.236151  | 0.6442378 |
| P12970 | Rpl7a   | 0.3641389 | 0.3329373 | 0.2807891 | 0.8743196 | -0.102609 | 0.5171832 | 0.8439142 | 0.7529159 |

|        |         |           |           |           |           |           |           |           |           |
|--------|---------|-----------|-----------|-----------|-----------|-----------|-----------|-----------|-----------|
| P62918 | Rpl8    | -0.313653 | 0.3075763 | 0.313064  | 0.8743196 | -0.629394 | 0.3531426 | 0.0821124 | 0.6209341 |
| P51410 | Rpl9    | 0.3031013 | 0.2890435 | 0.2997086 | 0.8743196 | -0.445131 | 0.3883992 | 0.2584132 | 0.6500471 |
| P14869 | Rplp0   | -0.265163 | 0.362043  | 0.4666363 | 0.8743196 | 0.1987668 | 0.3228675 | 0.5406784 | 0.6979269 |
| P47955 | Rplp1   | -0.283124 | 0.3545081 | 0.4369626 | 0.8743196 | -0.274665 | 0.6226554 | 0.6663747 | 0.7215904 |
| P99027 | Rplp2   | -0.043966 | 0.568971  | 0.9387348 | 0.9048359 | 0.0732616 | 0.5852197 | 0.9009878 | 0.7610813 |
| Q91YQ5 | Rpn1    | 0.1014462 | 0.3487879 | 0.7717972 | 0.8924353 | 0.0653437 | 0.375148  | 0.8621472 | 0.7561118 |
| Q9DBG6 | Rpn2    | 0.2209354 | 0.3177399 | 0.4888862 | 0.8743196 | -0.045789 | 0.3324991 | 0.8908689 | 0.7593428 |
| Q91WE3 | Rpp25   | -0.110857 | 0.2800563 | 0.6977977 | 0.8900083 | -0.180562 | 0.173747  | 0.3176445 | 0.6594641 |
| P63325 | Rps10   | 0.108102  | 0.3447362 | 0.7547603 | 0.8923639 | 0.563074  | 0.3624064 | 0.1253441 | 0.6209341 |
| P62281 | Rps11   | -0.123701 | 0.4072381 | 0.7623144 | 0.8923639 | 0.1714829 | 0.3687697 | 0.6437575 | 0.7165096 |
| P63323 | Rps12   | 0.6272162 | 0.5101608 | 0.2262698 | 0.8743196 | 0.4146224 | 0.5658155 | 0.4687104 | 0.6745089 |
| Q6ZWZ6 | Rps12   | 0.0854165 | 0.2867723 | 0.7744601 | 0.8935551 | -0.035826 | 0.2230981 | 0.8776921 | 0.7585027 |
| P62301 | Rps13   | 0.5876823 | 0.4662682 | 0.2137485 | 0.8743196 | 0.3325997 | 0.5655608 | 0.5596987 | 0.698589  |
| P62264 | Rps14   | -0.130403 | 0.3125221 | 0.678112  | 0.8900083 | -0.990411 | 0.3194236 | 0.0032286 | 0.5840626 |
| P62843 | Rps15   | -2.303747 | 1.6483792 | 0.1755745 | 0.8743196 | -1.04491  | 1.6258799 | 0.5277353 | 0.69337   |
| P62245 | Rps15a  | -1.22138  | 1.2828753 | 0.346928  | 0.8743196 | -1.237304 | 1.3827751 | 0.3771861 | 0.6594641 |
| P14131 | Rps16   | 0.2982798 | 0.4828658 | 0.5403451 | 0.8753373 | 0.6561139 | 0.3615197 | 0.0783735 | 0.6209341 |
| P63276 | Rps17   | 0.3416963 | 0.3667698 | 0.3572559 | 0.8743196 | -0.181538 | 0.4232949 | 0.6707245 | 0.7327095 |
| P62270 | Rps18   | -0.254641 | 0.3721918 | 0.4958729 | 0.8748057 | -0.397546 | 0.3382616 | 0.2439293 | 0.6500471 |
| Q9CZX8 | Rps19   | -0.05067  | 0.3066598 | 0.8692313 | 0.898064  | 0.1394193 | 0.3523811 | 0.693722  | 0.7257713 |
| P25444 | Rps2    | -0.187389 | 0.2212695 | 0.3990238 | 0.8743196 | -0.061594 | 0.186377  | 0.7418065 | 0.7347883 |
| P60867 | Rps20   | -0.322155 | 0.5083404 | 0.5308999 | 0.8753373 | -0.065002 | 0.5019455 | 0.8979213 | 0.7608548 |
| Q9CQR2 | Rps21   | -0.26548  | 0.3178441 | 0.4078013 | 0.8743196 | -0.317724 | 0.3514053 | 0.3711967 | 0.6594641 |
| P62267 | Rps23   | -0.409694 | 0.6016667 | 0.5027128 | 0.8753373 | 0.0629165 | 0.5325715 | 0.9071375 | 0.7612577 |
| P62849 | Rps24   | -0.731516 | 0.8203567 | 0.3770939 | 0.8743196 | -0.571687 | 0.8169236 | 0.4880011 | 0.6803412 |
| P62852 | Rps25   | -1.359839 | 0.6300548 | 0.0347235 | 0.8743196 | -0.788078 | 0.6669158 | 0.2424185 | 0.6496933 |
| P62855 | Rps26   | -0.089269 | 0.5049666 | 0.8612269 | 0.897347  | -0.605615 | 0.8625887 | 0.490714  | 0.6804142 |
| P62983 | Rps27a  | 0.4435132 | 1.1305268 | 0.697516  | 0.8900083 | 1.3003736 | 1.0414403 | 0.222519  | 0.6442378 |
| Q6ZWY3 | Rps27l  | 0.665777  | 0.7854055 | 0.4099357 | 0.8743196 | 0.5509362 | 1.1083944 | 0.6274482 | 0.7115945 |
| P62858 | Rps28   | -0.906212 | 0.6429922 | 0.1721049 | 0.8743196 | 0.0298491 | 0.2852616 | 0.9177057 | 0.7627031 |
| P62274 | Rps29   | -0.023671 | 0.4187926 | 0.9556717 | 0.9060514 | 0.1431556 | 0.4052503 | 0.7295618 | 0.7324246 |
| P62908 | Rps3    | 0.360944  | 0.2399366 | 0.1351457 | 0.8743196 | 0.1568553 | 0.2641471 | 0.5539233 | 0.6980496 |
| P97351 | Rps3a   | -0.034887 | 0.2083622 | 0.8673331 | 0.898064  | 0.1857116 | 0.2135374 | 0.3866161 | 0.6611124 |
| P62702 | Rps4x   | -0.069234 | 0.3475372 | 0.8424893 | 0.8956144 | -0.034784 | 0.3420684 | 0.9192319 | 0.7627031 |
| P97461 | Rps5    | 0.1298349 | 0.3615905 | 0.7211538 | 0.8910745 | 0.175058  | 0.4257577 | 0.6830906 | 0.7239064 |
| P62754 | Rps6    | -0.013871 | 0.2968849 | 0.9629036 | 0.9067461 | -0.182378 | 0.3397921 | 0.5939297 | 0.7056501 |
| Q8BSK8 | Rps6kb1 | -0.03338  | 0.4602779 | 0.944215  | 0.9057704 | -0.466478 | 0.3217278 | 0.197265  | 0.6429844 |
| P62082 | Rps7    | 0.1663356 | 0.323269  | 0.6089344 | 0.8792876 | 0.2043184 | 0.3071182 | 0.5090581 | 0.6853401 |
| P62242 | Rps8    | -0.385968 | 0.2591622 | 0.1414002 | 0.8743196 | -0.08316  | 0.2382994 | 0.728443  | 0.7323934 |
| Q6ZWN5 | Rps9    | -0.13557  | 0.3018898 | 0.6546104 | 0.8900083 | -0.682432 | 0.3963873 | 0.0896176 | 0.6209341 |
| P14206 | Rpsa    | -0.449135 | 0.4187529 | 0.2900633 | 0.8743196 | -0.321095 | 0.2822974 | 0.2633096 | 0.6500471 |
| Q8K4Q0 | Rptor   | 0.2664279 | 0.7106471 | 0.7188288 | 0.8910745 | -0.053481 | 1.0578258 | 0.9613189 | 0.7730074 |
| Q7TT45 | Rragd   | 0.8068638 | 0.5129799 | 0.1597406 | 0.8743196 | 0.5012142 | 0.5899919 | 0.4281774 | 0.6694352 |
| P62071 | Rras2   | -1.525854 | 0.6990164 | 0.0653642 | 0.8743196 | -1.343307 | 0.7983893 | 0.1434585 | 0.6209341 |
| Q99PL5 | Rrbp1   | 0.3106269 | 0.2295475 | 0.1774084 | 0.8743196 | 0.1339918 | 0.2655508 | 0.6144444 | 0.7084882 |
| Q3UH06 | Rreb1   | 0.1938543 | 0.6747202 | 0.7821936 | 0.8940257 | -1.359833 | 1.66652   | 0.4456936 | 0.6699704 |
| P07742 | Rrm1    | -0.196695 | 4.3202609 | 0.9649576 | 0.9067461 | -3.778191 | 5.298885  | 0.5026108 | 0.6823283 |
| B2RS91 | Rrn3    | -0.433763 | 0.5786912 | 0.4779497 | 0.8743196 | 0.4009317 | 0.4878604 | 0.4426057 | 0.6699704 |
| Q6P5B0 | Rrp12   | -0.754983 | 0.6576754 | 0.2627866 | 0.8743196 | -0.086547 | 0.3759041 | 0.8202464 | 0.7482226 |
| D6RDD0 | Rrp1b   | 1.7646514 | 1.3655573 | 0.2372895 | 0.8743196 | 1.4174809 | 1.566218  | 0.4003271 | 0.6629633 |
| Q80T69 | Rsb1    | 1.3288689 | 0.6817957 | 0.0922936 | 0.8743196 | 1.2825923 | 0.8081577 | 0.1635968 | 0.6273856 |
| Q8BFU0 | Rspo2   | -1.611323 | 1.8899202 | 0.4220976 | 0.8743196 | -0.967829 | 1.3089533 | 0.4875771 | 0.6803412 |
| Q9D7H3 | RtcA    | 0.0819216 | 1.0404136 | 0.9394435 | 0.9048359 | 2.2992849 | 0.7790631 | 0.0255683 | 0.6209341 |
| A2AQ19 | Rtf1    | -0.799305 | 1.1262972 | 0.5008548 | 0.8753373 | 0.0503856 | 0.4918296 | 0.9217414 | 0.7631853 |
| Q14B46 | Rtkn2   | 1.4909552 | 1.1798315 | 0.246793  | 0.8743196 | 2.4168184 | 0.7105346 | 0.0144708 | 0.6209341 |
| Q8K0T0 | Rtn1    | 0.8486352 | 0.6448894 | 0.2079518 | 0.8743196 | 0.6734038 | 0.6864573 | 0.3445053 | 0.6594641 |
| Q9ES97 | Rtn3    | -0.918672 | 0.7787422 | 0.2564969 | 0.8743196 | -0.333227 | 0.7084372 | 0.6458847 | 0.7175625 |
| Q924D0 | Rtn4ip1 | 0.0649508 | 0.4153199 | 0.8763975 | 0.9006736 | -0.286922 | 0.4604646 | 0.5366609 | 0.695758  |
| Q8BIJ7 | Rufy1   | 0.0065002 | 0.4856434 | 0.9894973 | 0.9093039 | -0.245495 | 0.3907771 | 0.5407383 | 0.6979269 |
| Q8R4C2 | Rufy2   | -0.362764 | 0.7051502 | 0.6227775 | 0.8826986 | -0.539194 | 0.918497  | 0.5785816 | 0.7021424 |
| Q0VDN7 | Rundc1  | -0.259905 | 0.4493191 | 0.5715496 | 0.8753373 | 0.2863624 | 0.4354245 | 0.5222302 | 0.6929797 |

|        |         |           |           |           |           |           |           |           |           |
|--------|---------|-----------|-----------|-----------|-----------|-----------|-----------|-----------|-----------|
| Q03347 | Runx1   | -0.237748 | 0.5627034 | 0.6853278 | 0.8900083 | -0.93838  | 0.5230177 | 0.122942  | 0.6209341 |
| Q61909 | Runx1t1 | 0.7252174 | 0.7195616 | 0.347083  | 0.8743196 | -0.087521 | 1.2529878 | 0.9465832 | 0.7697868 |
| Q80U22 | Rusc2   | -0.204326 | 0.5161373 | 0.7039855 | 0.8910745 | -0.327169 | 0.7194274 | 0.66527   | 0.7215904 |
| P60122 | Ruvbl1  | -0.015133 | 0.6379009 | 0.9813858 | 0.907495  | -0.377193 | 0.6547498 | 0.5743944 | 0.7015295 |
| Q6R617 | Rxfp1   | 1.6089546 | 0.759651  | 0.0719317 | 0.8743196 | 0.8756167 | 0.9204863 | 0.3782045 | 0.6594641 |
| Q91ZZ5 | Rxfp2   | -0.464557 | 0.4951494 | 0.3793684 | 0.8743196 | -0.417191 | 0.3554435 | 0.2849832 | 0.6518056 |
| P28704 | Rxrb    | -0.695509 | 1.3108468 | 0.6121198 | 0.8792876 | 0.6014621 | 1.6034406 | 0.7204828 | 0.7303836 |
| E9PZQ0 | Ryr1    | 0.6497426 | 0.6404743 | 0.3264431 | 0.8743196 | 0.4562272 | 0.4699424 | 0.3493575 | 0.6594641 |
| E9Q401 | Ryr2    | -0.335368 | 0.710028  | 0.6510617 | 0.8900083 | -0.234494 | 0.6855982 | 0.7439913 | 0.7357935 |
| A2AGL3 | Ryr3    | 0.8041561 | 0.4341925 | 0.0837984 | 0.8743196 | -0.140169 | 0.4340003 | 0.7518547 | 0.7375672 |
| P56565 | S100a1  | 0.105473  | 0.4088124 | 0.7975344 | 0.8943678 | 0.3423174 | 0.4672157 | 0.4679248 | 0.6738937 |
| P50543 | S100a11 | 1.4159365 | 1.1498931 | 0.2579476 | 0.8743196 | 1.5960613 | 1.3051469 | 0.2672179 | 0.6500471 |
| P97352 | S100a13 | -1.131207 | 1.0264042 | 0.3068598 | 0.8743196 | -0.804157 | 0.9492109 | 0.4293836 | 0.6694352 |
| P14069 | S100a6  | 0.2202162 | 0.3123352 | 0.5035486 | 0.8753373 | 0.3493194 | 0.4133851 | 0.4304994 | 0.6694352 |
| P27005 | S100a8  | 0.1023532 | 0.4638818 | 0.8283439 | 0.8943678 | -0.003977 | 0.5122769 | 0.9939233 | 0.7793235 |
| P31725 | S100a9  | -0.269914 | 0.6598831 | 0.6882955 | 0.8900083 | -0.761729 | 0.8326318 | 0.3769298 | 0.6594641 |
| P50114 | S100b   | -0.4886   | 0.4118437 | 0.2741758 | 0.8743196 | -0.593442 | 0.3934796 | 0.1822349 | 0.6395902 |
| P52592 | S1pr2   | 0.4642809 | 0.4947131 | 0.3792392 | 0.8743196 | 0.1707426 | 0.498365  | 0.7435787 | 0.7355992 |
| P31532 | Saa4    | 1.058755  | 0.7485848 | 0.2001639 | 0.8743196 | 0.3306784 | 0.8292092 | 0.7038548 | 0.7278106 |
| Q9EP69 | Sacm1l  | -1.127756 | 1.1330014 | 0.3527109 | 0.8743196 | -1.43661  | 1.4696236 | 0.3660557 | 0.6594641 |
| Q9JLC8 | Sacs    | 0.1105152 | 0.7112942 | 0.8785996 | 0.9006736 | -0.060271 | 0.70309   | 0.9329924 | 0.7667191 |
| Q9R1T2 | Sae1    | -0.72314  | 0.6744239 | 0.3005635 | 0.8743196 | -0.477617 | 0.5553786 | 0.4053778 | 0.6646266 |
| Q80YR5 | Safb2   | -0.873011 | 0.8754204 | 0.3518606 | 0.8743196 | 0.1825463 | 0.4868432 | 0.7205873 | 0.7303836 |
| Q9QX96 | Sall2   | 0.9105885 | 0.5763595 | 0.1581415 | 0.8743196 | -0.950341 | 0.8502886 | 0.3064528 | 0.6553142 |
| Q8BX22 | Sall4   | 1.8405773 | 0.6103724 | 0.01951   | 0.8743196 | 1.2927894 | 0.7229092 | 0.1239417 | 0.6209341 |
| Q1RNF8 | Samd11  | -0.644486 | 0.5230561 | 0.2576698 | 0.8743196 | -0.516755 | 0.4013786 | 0.2453658 | 0.6500471 |
| Q69Z37 | Samd9l  | 1.596893  | 0.6748412 | 0.0498752 | 0.8743196 | 1.6402938 | 0.7705564 | 0.0773467 | 0.6209341 |
| Q60710 | Samhd1  | -0.853239 | 0.7485513 | 0.2722225 | 0.8743196 | -0.531353 | 0.7912499 | 0.5136356 | 0.6888545 |
| Q497M0 | Samt2   | 2.4419951 | 0.4295855 | 0.0007472 | 0.8743196 | 1.597816  | 0.8401065 | 0.1058874 | 0.6209341 |
| P36536 | Sar1a   | -1.302396 | 0.622215  | 0.053742  | 0.8743196 | -0.129901 | 0.2046753 | 0.5366537 | 0.695758  |
| Q9CQC9 | Sar1b   | -0.771052 | 0.7517656 | 0.309544  | 0.8743196 | 0.6226529 | 0.6986666 | 0.3772666 | 0.6594641 |
| Q99LB7 | Sardh   | -0.084001 | 0.1223504 | 0.4927487 | 0.8748057 | -0.153763 | 0.1260788 | 0.2234307 | 0.6442378 |
| Q8BI29 | Sarg    | -0.237201 | 0.271819  | 0.4117887 | 0.8743196 | -0.399299 | 0.2510632 | 0.1628409 | 0.6273856 |
| Q6PDS3 | Sarm1   | -0.74594  | 0.5422563 | 0.2113406 | 0.8743196 | -0.292095 | 0.1754448 | 0.1469901 | 0.6209341 |
| P26638 | Sars    | 0.0670328 | 0.3056263 | 0.8273433 | 0.8943678 | -0.024603 | 0.2776348 | 0.9298192 | 0.7649924 |
| Q9JL8  | Sars2   | -0.725855 | 0.5566332 | 0.2334712 | 0.8743196 | -0.517667 | 0.2420533 | 0.0762925 | 0.6209341 |
| Q9Z315 | Sart1   | -0.916201 | 0.6950795 | 0.2289559 | 0.8743196 | -0.765108 | 1.6015495 | 0.6497485 | 0.7189488 |
| Q9JLI8 | Sart3   | 0.6760506 | 0.8964224 | 0.4753496 | 0.8743196 | 1.3303413 | 0.8211295 | 0.1563302 | 0.6211692 |
| Q8K352 | Sash3   | 1.6134705 | 1.5834881 | 0.3421514 | 0.8743196 | 0.6090647 | 1.7912498 | 0.7454274 | 0.7359583 |
| Q80UK7 | Sass6   | -0.829673 | 1.151661  | 0.4946175 | 0.8748057 | -0.139212 | 0.420283  | 0.7517307 | 0.7375672 |
| Q6P8J2 | Sat2    | 0.2378434 | 0.6421233 | 0.7220373 | 0.8910745 | -0.920905 | 0.6566322 | 0.2103403 | 0.6429844 |
| P70122 | Sbds    | 0.5884629 | 0.937507  | 0.5501273 | 0.8753373 | 0.4280465 | 0.7533856 | 0.5905368 | 0.7051736 |
| Q6ZPE2 | Sbf1    | -0.008212 | 0.2983687 | 0.9788112 | 0.9073254 | -2.70029  | 2.1591216 | 0.257625  | 0.6500471 |
| Q8QZX0 | Sbk1    | 0.1810336 | 0.4646443 | 0.7022954 | 0.8907355 | -0.598764 | 0.5364611 | 0.2845695 | 0.6516893 |
| Q689Z5 | Sbno1   | 0.289179  | 0.5893959 | 0.6386889 | 0.8883187 | -0.51684  | 0.4885809 | 0.3308466 | 0.6594641 |
| Q7TNB8 | Sbno2   | -0.48175  | 0.2668454 | 0.1139882 | 0.8743196 | -1.518491 | 0.7519969 | 0.0899903 | 0.6209341 |
| O35609 | Scamp3  | 1.8709413 | 1.4068938 | 0.2252661 | 0.8743196 | 0.1433054 | 1.8623932 | 0.9411675 | 0.7688429 |
| Q8K299 | Scara5  | -0.761304 | 0.6780212 | 0.2985389 | 0.8743196 | -0.256525 | 0.4209042 | 0.5645683 | 0.6997388 |
| O35114 | Scarb2  | 0.2140303 | 0.8454829 | 0.8035923 | 0.8943678 | 0.4054701 | 0.8817665 | 0.6532282 | 0.7198872 |
| Q5ND28 | Scarf1  | -1.268468 | 0.8152997 | 0.1637013 | 0.8743196 | 0.9617482 | 0.8765092 | 0.3146051 | 0.6594641 |
| P59222 | Scarf2  | -0.271232 | 1.2503349 | 0.834452  | 0.8943678 | 1.9289195 | 1.2202457 | 0.1650153 | 0.6282331 |
| Q03517 | Scg2    | -0.849388 | 1.359658  | 0.5519733 | 0.8753373 | -1.023161 | 1.3405623 | 0.4742549 | 0.6774295 |
| Q3TI53 | Schip1  | -0.105921 | 0.974326  | 0.9148715 | 0.9048359 | 0.3297765 | 0.7908961 | 0.6835067 | 0.7239396 |
| Q9JLI6 | Scly    | -0.241314 | 0.3084443 | 0.4379282 | 0.8743196 | -0.4995   | 0.3464042 | 0.15691   | 0.6211692 |
| Q6QIY3 | Scn10a  | -0.461642 | 0.8299807 | 0.5862705 | 0.8753373 | 0.1032693 | 0.8600806 | 0.906264  | 0.7612577 |
| Q9JIV9 | Scn5a   | 1.7778936 | 0.9510554 | 0.1037707 | 0.8743196 | 1.3774445 | 1.0758533 | 0.247697  | 0.6500471 |
| Q9WTU3 | Scn8a   | -1.35539  | 2.3445066 | 0.5813008 | 0.8753373 | 0.8219964 | 0.8415015 | 0.3663822 | 0.6594641 |
| Q62205 | Scn9a   | 0.0913619 | 0.2998326 | 0.769447  | 0.8923639 | 0.0513833 | 0.090884  | 0.5923173 | 0.7054772 |
| Q8VCL2 | Sco2    | -0.794173 | 0.7297149 | 0.3124934 | 0.8743196 | -1.954568 | 0.9203733 | 0.0778876 | 0.6209341 |
| Q78YZ6 | Scoc    | -1.970366 | 1.7672438 | 0.3016866 | 0.8743196 | 1.3703919 | 0.8187535 | 0.1452038 | 0.6209341 |
| P32020 | Scp2    | 0.0088564 | 0.2545658 | 0.9722733 | 0.9072902 | -0.264582 | 0.2629122 | 0.3153044 | 0.6594641 |

|        |           |           |           |           |           |           |           |           |           |
|--------|-----------|-----------|-----------|-----------|-----------|-----------|-----------|-----------|-----------|
| Q920A5 | Scsep1    | -0.183244 | 0.3389529 | 0.5909541 | 0.8753373 | -0.512398 | 0.5372646 | 0.3450058 | 0.6594641 |
| Q8VCA8 | Scrn2     | 0.1415155 | 0.3993257 | 0.7246347 | 0.8910745 | -0.15399  | 0.4071047 | 0.7071916 | 0.7282267 |
| Q3TMH2 | Scrn3     | 0.195384  | 0.3660005 | 0.5959714 | 0.8770074 | -0.385711 | 0.4825996 | 0.4287595 | 0.6694352 |
| Q6NZL8 | Scube1    | -0.319533 | 0.9692941 | 0.7513056 | 0.8923639 | 0.4980514 | 0.7948046 | 0.5539775 | 0.6980496 |
| Q64519 | Sdc3      | 0.3890724 | 1.457005  | 0.7971377 | 0.8943678 | 1.5987641 | 1.0589888 | 0.1818579 | 0.6395902 |
| O08992 | Sdcbp     | 0.0282372 | 0.3427735 | 0.9366519 | 0.9048359 | 0.6651599 | 0.362187  | 0.1159376 | 0.6209341 |
| Q99JZ0 | Sdcbp2    | -0.443068 | 0.9436974 | 0.6529839 | 0.8900083 | 0.0485643 | 0.3687624 | 0.8995304 | 0.7608777 |
| A2AIW0 | Sdccag3   | 0.9955955 | 0.4620768 | 0.0681481 | 0.8743196 | -1.270586 | 0.9819018 | 0.2432373 | 0.6496933 |
| Q8K2B3 | Sdha      | 0.0582217 | 0.2578108 | 0.8215556 | 0.8943678 | 0.1193325 | 0.2957244 | 0.6870375 | 0.7242619 |
| Q3U276 | Sdhaf1    | -0.007316 | 0.3785492 | 0.9851203 | 0.9078335 | -1.003504 | 0.4297891 | 0.0582509 | 0.6209341 |
| Q8C6I2 | Sdhaf2    | 2.7574998 | 2.0756743 | 0.2256901 | 0.8743196 | 3.5459239 | 2.1290485 | 0.1468662 | 0.6209341 |
| Q9CQA3 | Sdhh      | -0.137104 | 0.3469086 | 0.6938689 | 0.8900083 | 0.1965012 | 0.3514281 | 0.5780732 | 0.7021424 |
| Q9CZB0 | Sdhc      | -0.427637 | 0.7084195 | 0.5550959 | 0.8753373 | -1.221272 | 0.9104661 | 0.2027646 | 0.6429844 |
| Q9CXV1 | Sdhd      | 0.1603454 | 0.5089066 | 0.761887  | 0.8923639 | -0.111208 | 0.430359  | 0.8047282 | 0.7453447 |
| Q3UH53 | Sdk1      | -0.492771 | 0.5816459 | 0.424898  | 0.8743196 | -0.568377 | 0.6149109 | 0.3909768 | 0.6612653 |
| Q6V4S5 | Sdk2      | 0.3956871 | 0.8146033 | 0.6419851 | 0.8891711 | -0.29901  | 0.6414363 | 0.6575463 | 0.7202908 |
| Q63918 | Sdpr      | 0.1018031 | 0.3537121 | 0.7750135 | 0.8938033 | 0.3867068 | 0.3832114 | 0.3200445 | 0.6594641 |
| Q5M8N4 | Sdr39u1   | 0.0930248 | 0.5600399 | 0.8695267 | 0.898064  | 0.0017146 | 0.6915232 | 0.9980462 | 0.7800658 |
| Q8VBT2 | Sds       | -0.022547 | 0.2462664 | 0.9272449 | 0.9048359 | 0.2470087 | 0.2428154 | 0.3119812 | 0.6594641 |
| Q9R0P6 | Sec11a    | -1.488232 | 0.4908435 | 0.019061  | 0.8743196 | -0.145239 | 0.2115229 | 0.5179542 | 0.6910975 |
| Q9D1M0 | Sec13     | -0.63502  | 0.3643452 | 0.0892303 | 0.8743196 | -0.289473 | 0.2638404 | 0.2802855 | 0.6506857 |
| Q99J08 | Sec14I2   | 0.0306134 | 0.1866043 | 0.8698772 | 0.898064  | -0.121029 | 0.1982032 | 0.5423501 | 0.6979269 |
| Q8R0F9 | Sec14I4   | -0.490921 | 0.419084  | 0.243625  | 0.8743196 | -0.222139 | 0.420309  | 0.598198  | 0.7061107 |
| B2RXM5 | Sec14I5   | -2.422316 | 0.8828796 | 0.0287661 | 0.8743196 | -0.818198 | 0.8401543 | 0.3677334 | 0.6594641 |
| O08547 | Sec22b    | -0.001349 | 1.0847899 | 0.9990242 | 0.9115801 | 1.4280265 | 1.0902936 | 0.2129501 | 0.6429844 |
| Q01405 | Sec23a    | -0.313178 | 0.4715487 | 0.5083517 | 0.8753373 | 0.1201559 | 0.4918709 | 0.8076696 | 0.745845  |
| Q9D662 | Sec23b    | -0.205217 | 0.8923212 | 0.8246826 | 0.8943678 | -0.755367 | 2.1802684 | 0.7408265 | 0.7346307 |
| Q6NZC7 | Sec23ip   | 0.1534208 | 0.6088324 | 0.8044674 | 0.8943678 | 0.1720762 | 0.3958331 | 0.6708954 | 0.7227095 |
| Q3U2P1 | Sec24a    | -0.117745 | 0.578364  | 0.8404704 | 0.895241  | 0.5297544 | 0.4502699 | 0.2531985 | 0.6500471 |
| Q6NXL1 | Sec24d    | -0.155133 | 0.236551  | 0.5218766 | 0.8753373 | -0.417698 | 0.2329964 | 0.0963053 | 0.6209341 |
| Q05DS7 | Sec31a    | 0.0682283 | 0.667256  | 0.9214241 | 0.9048359 | -3.757218 | 2.646212  | 0.205461  | 0.6429844 |
| Q3UPL0 | Sec31a    | 0.2454491 | 0.3383724 | 0.4694034 | 0.8743196 | -0.151388 | 0.3869648 | 0.6963014 | 0.7264503 |
| Q3TZ89 | Sec31b    | 0.7571821 | 1.3170317 | 0.5833458 | 0.8753373 | 1.3926529 | 1.2626727 | 0.3123147 | 0.6594641 |
| Q9CQS8 | Sec61b    | -0.265974 | 0.4521293 | 0.5748326 | 0.8753373 | -1.15943  | 0.5573885 | 0.082722  | 0.6209341 |
| Q6A098 | Secisbp2I | -1.065304 | 0.5376402 | 0.0661769 | 0.8743196 | -0.320315 | 0.5740625 | 0.5863396 | 0.7049451 |
| Q9Z2G6 | Sel1I     | 0.5523312 | 0.2477389 | 0.0610168 | 0.8743196 | 0.314871  | 0.3454502 | 0.3971838 | 0.6617584 |
| Q00690 | Sele      | -0.81774  | 1.2634244 | 0.5381147 | 0.8753373 | -1.254402 | 1.3698076 | 0.3951116 | 0.6617584 |
| P17563 | Selenbp1  | 0.1504533 | 0.3050976 | 0.6238828 | 0.8826986 | -0.077257 | 0.2815188 | 0.7849329 | 0.7439428 |
| Q63836 | Selenbp2  | -0.360962 | 0.3090748 | 0.246762  | 0.8743196 | -0.679645 | 0.3789683 | 0.077785  | 0.6209341 |
| Q9DBC0 | Selo      | 0.4362217 | 0.3081614 | 0.1648402 | 0.8743196 | 0.0256211 | 0.3972829 | 0.9489571 | 0.7704627 |
| Q62177 | Sema3b    | -1.201745 | 0.704585  | 0.1318496 | 0.8743196 | -0.903597 | 0.7880613 | 0.2952035 | 0.6540599 |
| Q62181 | Sema3c    | -0.96439  | 1.0993059 | 0.4094355 | 0.8743196 | 0.0483181 | 0.3814147 | 0.9033314 | 0.7610813 |
| Q8BH34 | Sema3d    | 0.1005044 | 0.6863141 | 0.8877015 | 0.9006736 | -0.919616 | 0.9849964 | 0.386529  | 0.6611124 |
| O09126 | Sema4d    | -0.990624 | 0.79409   | 0.2523304 | 0.8743196 | 0.3062432 | 0.4997811 | 0.5625278 | 0.6997388 |
| Q9Z123 | Sema4f    | -0.452414 | 0.5456761 | 0.420052  | 0.8743196 | -0.213231 | 0.2255009 | 0.3616031 | 0.6594641 |
| O54951 | Sema6b    | 0.297442  | 0.8465381 | 0.7356544 | 0.8923639 | -1.968966 | 1.6155056 | 0.2686635 | 0.6500471 |
| Q9WTM3 | Sema6c    | -0.577988 | 0.7264836 | 0.4523965 | 0.8743196 | 0.2041421 | 0.5703147 | 0.732639  | 0.7326734 |
| Q6P7W0 | Senp6     | -0.103078 | 0.2547479 | 0.6914625 | 0.8900083 | -0.383408 | 0.2320131 | 0.1223611 | 0.6209341 |
| P97364 | Sephs2    | 0.3610598 | 0.4587728 | 0.4334135 | 0.8743196 | 0.5381378 | 0.4451961 | 0.2305002 | 0.6442378 |
| P70274 | Sepp1     | 0.6258641 | 0.5511579 | 0.2739664 | 0.8743196 | 0.0996262 | 0.6225578 | 0.8753194 | 0.7581089 |
| F6YLP3 | Sepsecs   | -0.987411 | 1.5489654 | 0.5441006 | 0.8753373 | -0.282804 | 0.5778191 | 0.6419126 | 0.7159548 |
| Q9CY58 | Serbp1    | -0.069009 | 0.3009231 | 0.8193608 | 0.8943678 | -0.210304 | 0.404614  | 0.6053127 | 0.7082928 |
| Q9EPB5 | Serhl     | -0.114581 | 0.3793124 | 0.7713722 | 0.8924353 | -1.477351 | 0.7620137 | 0.1006167 | 0.6209341 |
| Q9QZI9 | Serinc3   | 1.0535692 | 0.8495675 | 0.2548841 | 0.8743196 | 0.684623  | 1.0059103 | 0.5215079 | 0.6929797 |
| Q5XK03 | Serinc4   | -0.674583 | 0.8298914 | 0.4430638 | 0.8743196 | 0.6827659 | 0.8963687 | 0.4751025 | 0.6774295 |
| Q8R121 | Serpina10 | -0.433554 | 0.2971793 | 0.1879582 | 0.8743196 | -0.976402 | 0.6793532 | 0.2006793 | 0.6429844 |
| P07758 | Serpina1a | 0.1870385 | 1.3424421 | 0.8931156 | 0.9006736 | 0.9295227 | 0.9983294 | 0.3877426 | 0.6611124 |
| P22599 | Serpina1b | 0.7968029 | 0.3848716 | 0.0498321 | 0.8743196 | 0.3820787 | 0.4121692 | 0.3649816 | 0.6594641 |
| Q00897 | Serpina1d | -0.082321 | 0.4785563 | 0.8649262 | 0.8975219 | -0.51533  | 0.5759899 | 0.3815963 | 0.6606339 |
| Q00898 | Serpina1e | -0.385768 | 0.4581844 | 0.4049503 | 0.8743196 | -0.038094 | 0.4059585 | 0.9257897 | 0.7634944 |
| Q8BYY9 | Serpina3b | 0.2443947 | 0.6975758 | 0.7363827 | 0.8923639 | 0.22271   | 0.3641821 | 0.5632833 | 0.6997388 |

|        |           |           |           |           |           |           |           |           |           |
|--------|-----------|-----------|-----------|-----------|-----------|-----------|-----------|-----------|-----------|
| P07759 | Serpina3k | -0.166239 | 0.6427463 | 0.7970438 | 0.8943678 | 0.7385853 | 0.3983552 | 0.07093   | 0.6209341 |
| Q06770 | Serpina6  | 0.0809913 | 0.4713007 | 0.8658553 | 0.8979818 | 0.280472  | 0.3557657 | 0.4446241 | 0.6699704 |
| Q60854 | Serpinb6  | -0.246991 | 0.5115285 | 0.6305388 | 0.8854638 | 0.7426543 | 0.3921016 | 0.0624127 | 0.6209341 |
| P32261 | Serpinc1  | -0.16527  | 0.3138143 | 0.5997784 | 0.8772764 | -0.228857 | 0.3296903 | 0.4896994 | 0.6803412 |
| P22777 | Serpine1  | -0.586188 | 0.561113  | 0.3127113 | 0.8743196 | -0.806291 | 0.5367668 | 0.1569609 | 0.6211692 |
| Q07235 | Serpine2  | 1.5733154 | 0.8531762 | 0.1077003 | 0.8743196 | 1.5839411 | 0.9650228 | 0.1518333 | 0.6211692 |
| E9Q6A2 | Serpine3  | -0.971646 | 0.8140849 | 0.2715327 | 0.8743196 | 0.0197217 | 0.569695  | 0.9735073 | 0.7756683 |
| Q61247 | Serpinf2  | -0.261349 | 0.4034379 | 0.5209065 | 0.8753373 | -0.34277  | 0.5966064 | 0.5693891 | 0.6997388 |
| P19324 | Serpinh1  | 0.354964  | 0.4022177 | 0.4067808 | 0.8743196 | 0.1330059 | 0.3067731 | 0.6797593 | 0.7239064 |
| P58006 | Sesn1     | 0.048307  | 1.0669036 | 0.9651505 | 0.9067461 | -0.624419 | 1.4545949 | 0.6827107 | 0.7239064 |
| Q9CYP7 | Sesn3     | -0.107968 | 0.428851  | 0.8084565 | 0.8943678 | 0.2120107 | 0.1204452 | 0.128855  | 0.6209341 |
| Q9EQU5 | Set       | 0.3674972 | 0.4662786 | 0.4353738 | 0.8743196 | 0.4606025 | 0.3978788 | 0.2550768 | 0.6500471 |
| Q8CFT2 | Setd1b    | -1.572008 | 2.3703888 | 0.5284385 | 0.8753373 | -1.005463 | 0.8401238 | 0.2765217 | 0.6500471 |
| Q91WC0 | Setd3     | 0.5573129 | 1.1475364 | 0.6420402 | 0.8891711 | 0.9670337 | 0.795139  | 0.2695861 | 0.6500471 |
| P58467 | Setd4     | -0.071996 | 0.9365044 | 0.940872  | 0.9048359 | -0.659075 | 1.3000897 | 0.6302801 | 0.7120542 |
| Q5XJV7 | Setd5     | 0.4546995 | 0.7097926 | 0.5421712 | 0.8753373 | -1.887073 | 0.9929395 | 0.1060975 | 0.6209341 |
| Q88974 | Setdb1    | 0.333534  | 0.4664579 | 0.4977352 | 0.8748057 | 0.1499727 | 0.3645921 | 0.6951096 | 0.7260121 |
| Q80UJ9 | Setmar    | -0.0341   | 0.5069903 | 0.9482564 | 0.9060514 | -2.042778 | 1.2189559 | 0.1447863 | 0.6209341 |
| Q8K4Z5 | Sf3a1     | 0.1009819 | 0.6642926 | 0.8834644 | 0.9006736 | -0.622423 | 0.9838369 | 0.5502969 | 0.6980496 |
| Q8QZY9 | Sf3b4     | 0.0308474 | 0.628739  | 0.9622402 | 0.9067461 | 0.2264402 | 0.3710042 | 0.5640212 | 0.6997388 |
| O70456 | Sfn       | 1.1348584 | 1.26868   | 0.4007539 | 0.8743196 | -0.680005 | 1.5834723 | 0.6825967 | 0.7239064 |
| Q99JR1 | Sfxn1     | 0.2651388 | 0.4654218 | 0.5721658 | 0.8753373 | 0.3042074 | 0.6718676 | 0.6535842 | 0.7198872 |
| P82347 | Sgcd      | 0.5827203 | 0.7543899 | 0.4651302 | 0.8743196 | -0.147159 | 0.8031987 | 0.8606627 | 0.7561118 |
| Q9QZS5 | Sgk2      | -0.293942 | 1.0788555 | 0.7931326 | 0.8943678 | -2.00441  | 2.1341018 | 0.3838673 | 0.6606339 |
| Q8BJU0 | Sgta      | 0.6028954 | 0.3834723 | 0.1260561 | 0.8743196 | 0.3543042 | 0.4714833 | 0.4588721 | 0.6712964 |
| O35324 | Sh2d1b    | 0.1920545 | 0.86688   | 0.8309909 | 0.8943678 | 0.7123441 | 1.2436885 | 0.5876079 | 0.7049451 |
| Q9D413 | Sh2d6     | 0.7922681 | 0.4098447 | 0.0723282 | 0.8743196 | 0.3034566 | 0.4991842 | 0.5537227 | 0.6980496 |
| Q9WUZ7 | Sh3bgr    | -0.039838 | 0.324544  | 0.9039344 | 0.9044421 | -0.426201 | 0.5905087 | 0.4832272 | 0.6796099 |
| Q9JJU8 | Sh3bgrl   | 0.1465541 | 0.2319492 | 0.5305549 | 0.8753373 | -0.052084 | 0.3154928 | 0.8696856 | 0.7571111 |
| Q91VW3 | Sh3bgrl3  | 0.2402178 | 0.7210864 | 0.7420515 | 0.8923639 | 0.3561208 | 0.6844301 | 0.6085548 | 0.7082928 |
| P55194 | Sh3bp1    | 0.5432328 | 0.8164191 | 0.5271127 | 0.8753373 | -0.660758 | 0.8333545 | 0.4580392 | 0.6712964 |
| Q06649 | Sh3bp2    | 0.0386382 | 1.2272161 | 0.9757621 | 0.9072902 | 0.3584422 | 1.3688728 | 0.802193  | 0.7442789 |
| Q99LH9 | Sh3bp5l   | -0.09054  | 1.0033156 | 0.9306238 | 0.9048359 | -0.546631 | 0.5138091 | 0.328314  | 0.6594641 |
| Q9JK48 | Sh3glb1   | 0.3539101 | 0.2621271 | 0.1901066 | 0.8743196 | 0.247856  | 0.3076612 | 0.4299406 | 0.6694352 |
| Q8R550 | Sh3kbp1   | 0.6652803 | 0.6427542 | 0.3350749 | 0.8743196 | -1.595191 | 0.8165166 | 0.0985584 | 0.6209341 |
| Q8C120 | Sh3rf3    | 2.2202504 | 1.4789682 | 0.1769917 | 0.8743196 | 2.8886757 | 1.5127867 | 0.1047796 | 0.6209341 |
| D3YZU1 | Shank1    | 0.1748168 | 0.7668321 | 0.8261834 | 0.8943678 | 0.5537674 | 0.2905194 | 0.1052714 | 0.6209341 |
| Q80Z38 | Shank2    | -0.226802 | 0.6478744 | 0.7365825 | 0.8923639 | -0.840609 | 0.7399    | 0.2992424 | 0.6540599 |
| Q4ACU6 | Shank3    | 0.0709283 | 0.9942605 | 0.9451243 | 0.9060514 | 1.0999575 | 0.9162888 | 0.2752055 | 0.6500471 |
| Q9Z179 | Shcbp1    | 0.2970641 | 0.67369   | 0.6655377 | 0.8900083 | -0.591807 | 0.7922526 | 0.4683642 | 0.6742685 |
| Q8BSD5 | She       | 0.3859238 | 0.6688154 | 0.5819956 | 0.8753373 | 0.4036255 | 0.8196786 | 0.6399209 | 0.7151423 |
| P50431 | Shmt1     | 0.2106046 | 0.3091268 | 0.4970125 | 0.8748057 | 0.2166941 | 0.309169  | 0.4849357 | 0.6796099 |
| Q9D5J6 | Shpk      | -0.102256 | 0.3818429 | 0.789858  | 0.8943678 | 0.1384994 | 0.2619122 | 0.5993804 | 0.7061107 |
| Q7TPQ3 | Shprh     | -1.124043 | 0.6830168 | 0.1438208 | 0.8743196 | -0.236946 | 0.2672905 | 0.409483  | 0.666531  |
| A2ALU4 | Shroom2   | 0.2639426 | 0.621606  | 0.6771456 | 0.8900083 | 0.7865596 | 0.6699886 | 0.2614585 | 0.6500471 |
| Q1W617 | Shroom4   | -1.547664 | 2.1188399 | 0.4888469 | 0.8743196 | 0.5765544 | 0.336866  | 0.1378287 | 0.6209341 |
| Q91Y57 | Siglec12  | -0.786072 | 0.9390016 | 0.4301661 | 0.8743196 | -1.183119 | 0.4871761 | 0.0512653 | 0.6209341 |
| Q6P4S6 | Sik3      | 1.6256624 | 1.2950112 | 0.2496415 | 0.8743196 | -0.930747 | 1.7586462 | 0.6156382 | 0.7084882 |
| Q61079 | Sim2      | -0.840765 | 1.4572554 | 0.5820434 | 0.8753373 | -0.373336 | 0.9511342 | 0.7082415 | 0.728514  |
| Q62141 | Sin3b     | 0.6674443 | 0.8706274 | 0.4552017 | 0.8743196 | -0.067208 | 1.2499137 | 0.957936  | 0.7721509 |
| P46062 | Sipa1     | 0.675009  | 0.7466005 | 0.3959851 | 0.8743196 | 1.9039182 | 0.705694  | 0.0356738 | 0.6209341 |
| Q8C0T5 | Sipa1l1   | -0.304246 | 0.7090192 | 0.6807417 | 0.8900083 | 0.668413  | 0.557455  | 0.2757121 | 0.6500471 |
| P97797 | Sirpa     | -3.717044 | 2.3112442 | 0.1518172 | 0.8743196 | -0.462801 | 0.9861411 | 0.6554203 | 0.7198872 |
| Q8K2C6 | Sirt5     | -0.279228 | 0.3036486 | 0.3624897 | 0.8743196 | 0.0974352 | 0.2019137 | 0.6319757 | 0.7120542 |
| Q62233 | Six3      | -0.186564 | 0.7003911 | 0.7976286 | 0.8943678 | 0.5911283 | 0.6891816 | 0.423976  | 0.6694352 |
| Q61321 | Six4      | 0.333394  | 1.4403885 | 0.8235769 | 0.8943678 | 1.887787  | 1.0827031 | 0.1318548 | 0.6209341 |
| Q9CTN5 | Six6os1   | -0.029005 | 0.3024807 | 0.9262958 | 0.9048359 | 0.0210825 | 0.2049433 | 0.9214182 | 0.7630855 |
| Q60698 | Ski       | 0.9630083 | 0.8187923 | 0.2779863 | 0.8743196 | 1.868309  | 0.9126294 | 0.0865804 | 0.6209341 |
| Q80YR3 | Skida1    | -1.608078 | 0.8839043 | 0.1116847 | 0.8743196 | -1.324222 | 0.9839243 | 0.2269727 | 0.6442378 |
| Q60665 | Skil      | -0.001305 | 0.4135264 | 0.9975238 | 0.9111566 | -0.224307 | 0.2470046 | 0.3803468 | 0.6603397 |
| A7TZF3 | Skint4    | -1.963204 | 1.0874117 | 0.1139813 | 0.8743196 | -1.22605  | 1.0293196 | 0.2785825 | 0.6503929 |

|        |          |           |           |           |           |           |           |           |           |
|--------|----------|-----------|-----------|-----------|-----------|-----------|-----------|-----------|-----------|
| A7XUZ6 | Skint6   | -0.185593 | 0.3226458 | 0.5831504 | 0.8753373 | -0.36403  | 0.2659795 | 0.2201413 | 0.6434585 |
| Q9CZU3 | Skiv2l2  | -1.597343 | 2.0702437 | 0.4656116 | 0.8743196 | 0.7984365 | 0.9769609 | 0.4450086 | 0.6699704 |
| Q8BX46 | Skor1    | 1.1744811 | 0.6149778 | 0.0687094 | 0.8743196 | 2.1253404 | 0.6107272 | 0.0023619 | 0.5840626 |
| Q9WTX5 | Skp1     | -0.050215 | 0.6572964 | 0.9395952 | 0.9048359 | 0.5682545 | 0.3309256 | 0.0974005 | 0.6209341 |
| A2AQ25 | Skt      | 2.0510716 | 0.7326767 | 0.0265463 | 0.8743196 | 2.7169882 | 0.7840209 | 0.0133778 | 0.6209341 |
| Q9QUM4 | Slamf1   | 0.6088463 | 0.8225245 | 0.4832511 | 0.8743196 | 0.4847631 | 0.9053954 | 0.6116162 | 0.7082928 |
| O08705 | Slc10a1  | 0.3252624 | 1.293684  | 0.8087081 | 0.8943678 | 0.9194374 | 0.9130889 | 0.3528256 | 0.6594641 |
| Q3TMR9 | Slc12a5  | 0.8668984 | 1.5997418 | 0.6047004 | 0.8792876 | 0.5824813 | 1.7629526 | 0.752329  | 0.7375672 |
| Q9WVL3 | Slc12a7  | -0.24758  | 0.6147303 | 0.699151  | 0.8901989 | -0.656862 | 0.7569563 | 0.4188705 | 0.6694352 |
| Q99MR3 | Slc12a9  | 0.9796489 | 1.1906394 | 0.4377533 | 0.8743196 | 0.6456096 | 1.5077077 | 0.6834458 | 0.7239396 |
| Q8BGC3 | Slc16a12 | 0.7032767 | 0.7803005 | 0.3973831 | 0.8743196 | -0.442743 | 1.1116241 | 0.7042063 | 0.7278368 |
| Q61983 | Slc17a1  | -0.077654 | 0.3886422 | 0.8473102 | 0.8962775 | -0.742384 | 0.5761778 | 0.2450358 | 0.6500471 |
| Q5SZA1 | Slc17a2  | 0.6847377 | 0.4861688 | 0.201834  | 0.8743196 | 0.4699271 | 0.5765671 | 0.4461855 | 0.6699704 |
| Q8BN82 | Slc17a5  | 0.2901051 | 1.2578273 | 0.8241904 | 0.8943678 | 1.999269  | 0.6368905 | 0.0200906 | 0.6209341 |
| Q8BLE7 | Slc17a6  | 0.9340835 | 0.5817295 | 0.1523748 | 0.8743196 | -0.962536 | 1.1288    | 0.4265441 | 0.6694352 |
| O35304 | Slc18a3  | 0.0198504 | 0.9716319 | 0.9842706 | 0.9078335 | 0.1066912 | 0.9998993 | 0.9185037 | 0.7627031 |
| Q61609 | Slc20a1  | -0.382873 | 0.3219951 | 0.2731811 | 0.8743196 | -1.239301 | 0.2302862 | 0.0016931 | 0.5840626 |
| Q497L8 | Slc22a16 | -0.901994 | 1.1256118 | 0.4492776 | 0.8743196 | -0.616289 | 0.8295042 | 0.4855664 | 0.6796099 |
| Q78KK3 | Slc22a18 | 0.9568431 | 0.6559282 | 0.1879944 | 0.8743196 | 0.6280481 | 0.6974399 | 0.4025471 | 0.6636198 |
| Q3UHH2 | Slc22a23 | 0.1711889 | 0.7419981 | 0.8241355 | 0.8943678 | -1.444354 | 1.2290286 | 0.2844344 | 0.6516893 |
| O88909 | Slc22a8  | -0.761008 | 0.8104413 | 0.3626042 | 0.8743196 | -0.558011 | 0.7729567 | 0.4831291 | 0.6796099 |
| Q91WD8 | Slc24a1  | -0.068196 | 0.3180145 | 0.8363146 | 0.8943678 | -0.525136 | 0.2113531 | 0.047506  | 0.6209341 |
| Q9QZD8 | Slc25a10 | 0.8886665 | 1.0484899 | 0.4054126 | 0.8743196 | 0.7715419 | 1.2681514 | 0.5497708 | 0.6980496 |
| Q9CR62 | Slc25a11 | -0.639444 | 0.5356536 | 0.2511086 | 0.8743196 | -1.198608 | 0.666603  | 0.0954152 | 0.6209341 |
| Q8BH59 | Slc25a12 | -0.048669 | 0.2757056 | 0.8606391 | 0.897347  | -0.278083 | 0.2810789 | 0.3282992 | 0.6594641 |
| Q9QXX4 | Slc25a13 | -0.293771 | 0.2707142 | 0.2801969 | 0.8743196 | 0.0161534 | 0.2509462 | 0.9488081 | 0.7704627 |
| Q9WVD5 | Slc25a15 | -0.349    | 0.3007868 | 0.2529838 | 0.8743196 | 0.0459863 | 0.3116209 | 0.8835528 | 0.7585208 |
| Q9Z2Z6 | Slc25a20 | -0.140285 | 0.3213014 | 0.675542  | 0.8900083 | -0.20746  | 0.1839321 | 0.3024297 | 0.6540599 |
| Q8BZ09 | Slc25a21 | -0.261884 | 0.4874623 | 0.6077487 | 0.8792876 | -0.027951 | 0.1781032 | 0.8804432 | 0.7585208 |
| Q6GQS1 | Slc25a23 | 0.6870672 | 0.396429  | 0.1266691 | 0.8743196 | -2.230259 | 1.445887  | 0.1738967 | 0.6342694 |
| Q8BL03 | Slc25a29 | 4.2502156 | 2.8351816 | 0.1775264 | 0.8743196 | 2.2419252 | 3.7344268 | 0.5702442 | 0.6997388 |
| Q8VEM8 | Slc25a3  | -0.344124 | 0.2917471 | 0.2426231 | 0.8743196 | -0.288233 | 0.2396491 | 0.2342328 | 0.6442378 |
| P48962 | Slc25a4  | -0.107036 | 0.3954565 | 0.7878341 | 0.8943678 | -0.301768 | 0.3516902 | 0.3958532 | 0.6617584 |
| Q8BVN7 | Slc25a41 | -3.828878 | 4.6941851 | 0.4415588 | 0.8743196 | 2.6125647 | 5.0080942 | 0.6205899 | 0.7091807 |
| Q8CFJ7 | Slc25a45 | -0.628315 | 0.7451779 | 0.4270002 | 0.8743196 | -2.203852 | 0.6688878 | 0.0165146 | 0.6209341 |
| P51881 | Slc25a5  | 0.0871949 | 0.640286  | 0.8925585 | 0.9006736 | -0.500934 | 0.517307  | 0.3414647 | 0.6594641 |
| Q60714 | Slc27a1  | -0.289276 | 1.0869515 | 0.7978035 | 0.8943678 | 0.7588118 | 0.8902718 | 0.4267337 | 0.6694352 |
| O35488 | Slc27a2  | -0.120069 | 0.2424279 | 0.621259  | 0.8826986 | 0.1021487 | 0.2360266 | 0.6660109 | 0.7215904 |
| O88561 | Slc27a3  | 0.1552754 | 0.6484369 | 0.8176085 | 0.8943678 | 0.0429063 | 0.6762964 | 0.9514745 | 0.7706776 |
| Q4LDG0 | Slc27a5  | 0.2011636 | 0.1894945 | 0.2901213 | 0.8743196 | -0.066181 | 0.2291076 | 0.7731383 | 0.7428116 |
| Q9ERH8 | Slc28a3  | -0.778074 | 1.2833511 | 0.5634631 | 0.8753373 | 0.6573227 | 0.8661802 | 0.4766708 | 0.6786617 |
| P14246 | Slc2a2   | -0.182463 | 0.6366943 | 0.7783554 | 0.8940257 | -0.348563 | 0.5868508 | 0.5627355 | 0.6997388 |
| Q99J27 | Slc33a1  | -0.062565 | 0.3891967 | 0.8744327 | 0.9002935 | -0.293235 | 0.4127101 | 0.4899382 | 0.6803412 |
| F6WZ30 | Slc35a2  | -0.626294 | 0.8873889 | 0.5031346 | 0.8753373 | 0.5656732 | 0.4595012 | 0.2643642 | 0.6500471 |
| Q8BLX4 | Slc35c1  | -1.407767 | 1.3586075 | 0.3345797 | 0.8743196 | 0.0098992 | 0.3633191 | 0.9791467 | 0.7762206 |
| Q8VCX2 | Slc35c2  | 0.3611336 | 1.0176261 | 0.733132  | 0.8923639 | 1.1823565 | 1.2197688 | 0.3698165 | 0.6594641 |
| Q7TML3 | Slc35f2  | 0.1352333 | 0.3938704 | 0.7414203 | 0.8923639 | -1.042646 | 0.4564809 | 0.0624477 | 0.6209341 |
| Q5I012 | Slc38a10 | -0.31754  | 0.6645378 | 0.6473283 | 0.8896469 | -0.910246 | 0.9128639 | 0.3571994 | 0.6594641 |
| Q9DCP2 | Slc38a3  | -0.73153  | 0.350573  | 0.0452347 | 0.8743196 | -0.727814 | 0.4703507 | 0.1334125 | 0.6209341 |
| Q31125 | Slc39a7  | 0.1941366 | 0.852626  | 0.8263929 | 0.8943678 | 0.5458575 | 0.8301378 | 0.5352234 | 0.695758  |
| Q8BJA2 | Slc41a1  | 0.1426369 | 0.8789283 | 0.8756666 | 0.9006736 | 0.4150069 | 0.8996555 | 0.6608362 | 0.7211958 |
| Q8BYR8 | Slc41a2  | -1.070769 | 0.7302271 | 0.1859833 | 0.8743196 | -0.552469 | 0.5370131 | 0.3432577 | 0.6594641 |
| Q921R8 | Slc41a3  | 0.5043656 | 0.8838006 | 0.5860624 | 0.8753373 | -1.189674 | 1.0077137 | 0.2824505 | 0.6508436 |
| P04919 | Slc4a1   | 0.1521606 | 0.3757621 | 0.6877352 | 0.8900083 | 0.5463343 | 0.3376493 | 0.1148924 | 0.6209341 |
| Q5DTL9 | Slc4a10  | 0.6759115 | 0.751508  | 0.3826477 | 0.8743196 | 1.1783921 | 0.5945942 | 0.0690464 | 0.6209341 |
| P13808 | Slc4a2   | 0.0331591 | 1.0270106 | 0.9751445 | 0.9072902 | 1.8436091 | 0.9044182 | 0.0876326 | 0.6209341 |
| P16283 | Slc4a3   | -0.624228 | 0.8380972 | 0.4678928 | 0.8743196 | -0.174149 | 0.3481995 | 0.6253349 | 0.7113805 |
| O88343 | Slc4a4   | 0.184653  | 0.2297507 | 0.4479925 | 0.8743196 | -1.064531 | 0.9320332 | 0.2969096 | 0.6540599 |
| Q9D6X5 | Slc52a3  | -0.979449 | 0.3641182 | 0.0310893 | 0.8743196 | -0.375865 | 0.8947638 | 0.689061  | 0.72435   |
| Q923I7 | Slc5a2   | 1.8617598 | 0.8059752 | 0.054191  | 0.8743196 | -0.057818 | 1.7933733 | 0.9753267 | 0.776185  |
| Q8BGY9 | Slc5a7   | -0.16438  | 0.2855868 | 0.5829164 | 0.8753373 | -0.075431 | 0.1484339 | 0.6294655 | 0.7120542 |

|        |          |           |           |           |           |           |           |           |           |
|--------|----------|-----------|-----------|-----------|-----------|-----------|-----------|-----------|-----------|
| Q8BYF6 | Slc5a8   | 2.2223685 | 1.2500056 | 0.1186609 | 0.8743196 | -0.048218 | 1.9465915 | 0.9810415 | 0.7764109 |
| O88575 | Slc6a20b | -0.832842 | 0.8305046 | 0.3493479 | 0.8743196 | 0.2029607 | 0.2314968 | 0.4143523 | 0.6675611 |
| Q8BXR1 | Slc7a14  | -0.257059 | 1.5085341 | 0.8695135 | 0.898064  | -2.447954 | 1.1306197 | 0.073553  | 0.6209341 |
| P70423 | Slc7a3   | -0.944686 | 0.7679236 | 0.2583629 | 0.8743196 | -0.753272 | 1.1930461 | 0.551069  | 0.6980496 |
| Q8BLQ7 | Slc7a4   | -0.828556 | 1.0427711 | 0.4392542 | 0.8743196 | -0.676107 | 0.6479629 | 0.3157628 | 0.6594641 |
| Q9Z127 | Slc7a5   | -0.735107 | 0.9222518 | 0.4515902 | 0.8743196 | -1.360595 | 0.7974747 | 0.1388595 | 0.6209341 |
| Q61165 | Slc9a1   | -0.408714 | 0.7496677 | 0.593635  | 0.876962  | -0.556931 | 0.4953075 | 0.2811713 | 0.6506857 |
| P70441 | Slc9a3r1 | 0.3068299 | 0.4001765 | 0.4478549 | 0.8743196 | 0.040048  | 0.7549897 | 0.958007  | 0.7721509 |
| Q8BLV3 | Slc9a7   | -1.843512 | 0.8603931 | 0.0693635 | 0.8743196 | -0.375482 | 0.3228232 | 0.2889431 | 0.652142  |
| Q9QXZ6 | Slco1a1  | -0.882629 | 0.5057518 | 0.0943015 | 0.8743196 | -0.388076 | 0.1609125 | 0.0256086 | 0.6209341 |
| Q9JL3  | Slco1b2  | 0.0176416 | 0.2199862 | 0.9371429 | 0.9048359 | -0.26874  | 0.1440146 | 0.0847524 | 0.6209341 |
| Q9EPT5 | Slco2a1  | 0.3621527 | 0.5288793 | 0.5039427 | 0.8753373 | 0.2517604 | 0.5713406 | 0.6667061 | 0.7215904 |
| Q8BxB6 | Slco2b1  | 1.2302411 | 0.7047084 | 0.1243626 | 0.8743196 | 0.0667423 | 0.8684757 | 0.9412415 | 0.7688429 |
| Q8CBA2 | Slfn5    | -0.162944 | 0.226638  | 0.4954583 | 0.8748057 | 0.2285257 | 0.2648794 | 0.4214138 | 0.6694352 |
| Q9D8T7 | Slirp    | -0.541856 | 0.476398  | 0.2670815 | 0.8743196 | -1.090584 | 0.5494703 | 0.061056  | 0.6209341 |
| Q9R1B9 | Slit2    | 0.3058729 | 1.6642663 | 0.85939   | 0.897347  | 2.053981  | 1.0550559 | 0.0994997 | 0.6209341 |
| Q810B8 | Slitrk4  | 0.0565013 | 0.76854   | 0.9434509 | 0.9054086 | -1.657187 | 1.3371035 | 0.2614803 | 0.6500471 |
| O54988 | Slk      | -0.587244 | 0.3857615 | 0.1487346 | 0.8743196 | -0.85018  | 0.6617892 | 0.221328  | 0.6437885 |
| Q3URD3 | Slmap    | 0.7370982 | 0.6309237 | 0.2609258 | 0.8743196 | 0.4845111 | 0.5878394 | 0.4246772 | 0.6694352 |
| P97430 | Slpi     | -0.787305 | 0.5088338 | 0.1657215 | 0.8743196 | -0.739662 | 0.9231435 | 0.4535438 | 0.6712964 |
| Q8CH25 | Sltm     | -0.773419 | 0.4508111 | 0.1299432 | 0.8743196 | -0.803519 | 0.5984216 | 0.2279252 | 0.6442378 |
| Q6DIC0 | Smarca2  | -1.740874 | 1.6638664 | 0.3302084 | 0.8743196 | 1.1411767 | 0.6428085 | 0.1261953 | 0.6209341 |
| Q04692 | Smarcad1 | -0.360409 | 0.8183393 | 0.6729161 | 0.8900083 | 0.2030897 | 0.2503864 | 0.4482764 | 0.6701719 |
| Q6PDG5 | Smarcc2  | 0.1140357 | 0.3508963 | 0.7546902 | 0.8923639 | -0.078266 | 0.3320133 | 0.821481  | 0.7486349 |
| Q6P9Z1 | Smarcd3  | 0.3363349 | 1.5177344 | 0.8309487 | 0.8943678 | 1.2291554 | 1.3818284 | 0.4079732 | 0.6657745 |
| Q8CG48 | Smc2     | -2.172724 | 1.3308596 | 0.146578  | 0.8743196 | -0.673139 | 0.4380684 | 0.1752999 | 0.6347112 |
| Q9CW03 | Smc3     | -0.892872 | 0.486055  | 0.1088262 | 0.8743196 | -0.18374  | 0.4897385 | 0.7204318 | 0.7303836 |
| Q3UMB5 | Smcr8    | 0.0136021 | 1.1694007 | 0.991044  | 0.909535  | 1.0683712 | 1.3773532 | 0.4674063 | 0.6738937 |
| Q3V0Y1 | Smek3p   | -0.220281 | 0.5999647 | 0.7243512 | 0.8910745 | -0.090875 | 0.3507863 | 0.8042475 | 0.7453194 |
| Q8BKX6 | Smg1     | -0.848253 | 0.464397  | 0.0774087 | 0.8743196 | -0.135127 | 0.2773138 | 0.6300002 | 0.7120542 |
| Q8VE18 | Smg8     | -0.000226 | 0.0046407 | 0.9624608 | 0.9067461 | -0.001245 | 0.0033283 | 0.721267  | 0.7303836 |
| P97801 | Smn1     | 0.8150282 | 4.8354499 | 0.8709154 | 0.8985661 | 3.2015962 | 5.036867  | 0.548477  | 0.6980496 |
| Q8BGT7 | Smndc1   | 0.9495087 | 1.454031  | 0.5345961 | 0.8753373 | 2.028347  | 1.5965868 | 0.25097   | 0.6500471 |
| A2KF29 | Smoktcr  | -0.787677 | 1.1443581 | 0.5134122 | 0.8753373 | -0.162972 | 0.8922722 | 0.8610894 | 0.7561118 |
| Q921U8 | Smtn     | -1.014274 | 0.5980308 | 0.1336994 | 0.8743196 | -0.005338 | 0.1340612 | 0.9695288 | 0.7751233 |
| P97443 | Smyd1    | -0.044266 | 0.4247629 | 0.917443  | 0.9048359 | -0.104385 | 0.333202  | 0.7556579 | 0.7380125 |
| P60879 | Snap25   | -0.229475 | 0.9731262 | 0.8167677 | 0.8943678 | -0.772732 | 1.1310309 | 0.5064684 | 0.6838647 |
| Q8K0S9 | Snapc1   | 1.5709696 | 1.0599203 | 0.1818564 | 0.8743196 | 0.5962462 | 1.3698603 | 0.6785942 | 0.7239064 |
| Q91XA5 | Snapc2   | -0.198588 | 0.6318864 | 0.7624694 | 0.8923639 | -0.569398 | 1.0537955 | 0.608426  | 0.7082928 |
| O55042 | Snca     | -0.118121 | 1.312135  | 0.9290489 | 0.9048359 | 0.067889  | 1.5239567 | 0.9649095 | 0.7735697 |
| Q78PY7 | Snd1     | -0.203538 | 0.2836828 | 0.4745829 | 0.8743196 | 0.0950534 | 0.2693058 | 0.7248865 | 0.7309165 |
| Q70E20 | Sned1    | -2.051239 | 1.526606  | 0.2209798 | 0.8743196 | -0.043118 | 0.4349762 | 0.9242669 | 0.7634944 |
| Q8VDU5 | Snrk     | -1.263699 | 0.4266312 | 0.021044  | 0.8743196 | -0.122238 | 0.5150892 | 0.8203085 | 0.7482226 |
| Q6PE01 | Snrmp40  | 0.7494503 | 1.074445  | 0.5079738 | 0.8753373 | 1.8010815 | 0.8545469 | 0.0796316 | 0.6209341 |
| Q62189 | Snrpa    | -0.12129  | 0.7599139 | 0.8776964 | 0.9006736 | 0.4858039 | 0.9641434 | 0.6323142 | 0.7120542 |
| P57784 | Snrpa1   | -0.348934 | 0.8619701 | 0.6977022 | 0.8900083 | 0.672286  | 0.5472315 | 0.2652485 | 0.6500471 |
| P62320 | Snrpd3   | -0.272105 | 0.4712746 | 0.5817688 | 0.8753373 | -1.047028 | 0.7547839 | 0.2147165 | 0.6429844 |
| Q61234 | Snta1    | -0.311178 | 1.2624129 | 0.8123719 | 0.8943678 | 1.2012697 | 1.2557647 | 0.3757064 | 0.6594641 |
| F6PYH7 | Sntg1    | 0.3810767 | 0.7041062 | 0.6051437 | 0.8792876 | -0.246283 | 0.9519507 | 0.8045028 | 0.7453194 |
| Q9CSN1 | Snw1     | 0.015034  | 0.7678113 | 0.9849246 | 0.9078335 | 0.2607621 | 0.7078927 | 0.7252492 | 0.7309165 |
| Q9WV80 | Snx1     | 0.2442136 | 0.649927  | 0.7182269 | 0.8910745 | -0.990517 | 0.5351171 | 0.113628  | 0.6209341 |
| O70493 | Snx12    | 0.3836384 | 0.5909509 | 0.5260329 | 0.8753373 | 0.3757597 | 0.5229301 | 0.485124  | 0.6796099 |
| Q9CWX8 | Snx2     | 0.8693384 | 1.3251549 | 0.5217429 | 0.8753373 | 0.700264  | 1.3473017 | 0.6119719 | 0.7082928 |
| Q9CRB0 | Snx24    | -1.075721 | 0.8271735 | 0.2346127 | 0.8743196 | -0.209563 | 0.4500012 | 0.6578587 | 0.7202908 |
| O70492 | Snx3     | -0.073872 | 0.8684547 | 0.9327596 | 0.9048359 | 0.5254514 | 0.4581841 | 0.2615206 | 0.6500471 |
| Q4VAA7 | Snx33    | -0.237706 | 0.6860213 | 0.7391494 | 0.8923639 | -1.57754  | 1.4518689 | 0.3189444 | 0.6594641 |
| Q9D8U8 | Snx5     | 0.1692753 | 0.5313175 | 0.7529085 | 0.8923639 | 0.7915279 | 0.4268881 | 0.0785203 | 0.6209341 |
| Q6P8X1 | Snx6     | -1.646279 | 0.7187483 | 0.0557681 | 0.8743196 | -1.739215 | 0.791555  | 0.0703718 | 0.6209341 |
| Q91VH2 | Snx9     | 0.806132  | 0.8409127 | 0.3696721 | 0.8743196 | -0.138771 | 1.4204594 | 0.925357  | 0.7634944 |
| O88908 | Soat2    | 0.10719   | 0.9697879 | 0.9150919 | 0.9048359 | -0.707273 | 1.1362394 | 0.5565352 | 0.6980496 |
| O35718 | Socs3    | -0.43907  | 0.4585338 | 0.3701835 | 0.8743196 | -0.426157 | 0.2202217 | 0.1011228 | 0.6209341 |

|        |         |           |           |           |           |           |           |           |           |
|--------|---------|-----------|-----------|-----------|-----------|-----------|-----------|-----------|-----------|
| O54928 | Socs5   | 0.5127775 | 0.631569  | 0.4435721 | 0.8743196 | -1.939498 | 1.2925958 | 0.1841634 | 0.6405321 |
| P08228 | Sod1    | -0.23505  | 0.1640175 | 0.1532361 | 0.8743196 | -0.441203 | 0.1950053 | 0.0247679 | 0.6209341 |
| P09671 | Sod2    | -0.242509 | 0.2134581 | 0.2602198 | 0.8743196 | -0.391963 | 0.2668288 | 0.1475378 | 0.6209341 |
| Q3UHU5 | Soga2   | -0.237201 | 0.271819  | 0.4117887 | 0.8743196 | -0.399299 | 0.2510632 | 0.1628409 | 0.6273856 |
| Q62417 | Sorbs1  | 0.3372758 | 0.5671739 | 0.5609342 | 0.8753373 | -0.156276 | 0.6901169 | 0.8243745 | 0.7492441 |
| Q3UTJ2 | Sorbs2  | -2.046635 | 1.8426281 | 0.3033811 | 0.8743196 | 0.225944  | 0.6780021 | 0.7502829 | 0.7375672 |
| Q9R1Z8 | Sorbs3  | 0.6186958 | 0.9423774 | 0.5324664 | 0.8753373 | 0.5731755 | 0.9624415 | 0.5732425 | 0.7015295 |
| Q1HL23 | Sorcs1  | -1.151996 | 1.3166152 | 0.4106055 | 0.8743196 | 0.8626213 | 0.5089761 | 0.1410452 | 0.6209341 |
| Q9EPR5 | Sorcs2  | -0.456513 | 0.6718023 | 0.5071504 | 0.8753373 | -0.147647 | 0.4838491 | 0.7650819 | 0.7395427 |
| Q64442 | Sord    | -0.01221  | 0.1990715 | 0.9511491 | 0.9060514 | -0.065581 | 0.2161252 | 0.7618887 | 0.7385106 |
| O88307 | Sorl1   | -0.244724 | 0.3366229 | 0.4745632 | 0.8743196 | -0.195559 | 0.3678229 | 0.6008129 | 0.7065519 |
| Q6PHU5 | Sort1   | -0.32044  | 0.2631574 | 0.2627975 | 0.8743196 | -2.496242 | 1.5893251 | 0.1673237 | 0.6321977 |
| Q8CGW4 | Sox30   | -0.094867 | 0.5390352 | 0.8626529 | 0.897347  | 0.8061109 | 0.4633288 | 0.1054936 | 0.6209341 |
| Q06831 | Sox4    | 0.337142  | 0.62872   | 0.5996586 | 0.8772764 | -0.18963  | 0.5697806 | 0.7445816 | 0.7359583 |
| P35710 | Sox5    | -1.228713 | 0.8165103 | 0.1760814 | 0.8743196 | -0.597052 | 0.6311384 | 0.3806741 | 0.6604631 |
| Q04886 | Sox8    | -0.91863  | 0.7096085 | 0.2365375 | 0.8743196 | -1.151751 | 0.4415498 | 0.0402051 | 0.6209341 |
| Q8BVK9 | Sp110   | 0.1862022 | 0.3525594 | 0.6051255 | 0.8792876 | -0.478877 | 0.4429505 | 0.2992979 | 0.6540599 |
| Q58A65 | Spag9   | -0.316223 | 0.2987769 | 0.3008663 | 0.8743196 | -0.19931  | 0.1700351 | 0.254903  | 0.6500471 |
| Q5DU57 | Spata13 | 1.6419422 | 0.7402137 | 0.0423953 | 0.8743196 | 2.1044935 | 0.6267526 | 0.0051433 | 0.6209341 |
| Q3U6K5 | Spata6  | -0.331535 | 0.2418218 | 0.2127154 | 0.8743196 | -0.930894 | 0.5493692 | 0.1411111 | 0.6209341 |
| Q80VP2 | Spata7  | 1.7248148 | 1.2324189 | 0.2043741 | 0.8743196 | 1.3261615 | 1.4515091 | 0.3961332 | 0.6617584 |
| A2RRY8 | Spats1  | -0.123743 | 0.3800966 | 0.7542754 | 0.8923639 | 0.3730876 | 0.3030533 | 0.2643516 | 0.6500471 |
| Q9CYN2 | Spcs2   | 1.7036572 | 0.8845715 | 0.0954873 | 0.8743196 | 0.6810168 | 1.3144518 | 0.6229314 | 0.7107949 |
| Q5SXY1 | Specc1  | -1.528961 | 0.7359848 | 0.0553523 | 0.8743196 | 0.0925285 | 0.3453741 | 0.7929738 | 0.7439428 |
| Q62407 | Speg    | -0.211484 | 0.6687331 | 0.7546677 | 0.8923639 | 0.305109  | 0.5409536 | 0.5790107 | 0.7021424 |
| Q5F289 | Spem1   | 0.6760506 | 0.8964224 | 0.4753496 | 0.8743196 | 1.0454985 | 0.8424121 | 0.2608978 | 0.6500471 |
| Q62504 | Spen    | 0.7247653 | 0.4477573 | 0.1191541 | 0.8743196 | 0.4357657 | 0.5606161 | 0.4460805 | 0.6699704 |
| Q8R1X6 | Spg20   | -0.604407 | 1.1770583 | 0.6234145 | 0.8826986 | 0.6159979 | 0.7292783 | 0.4306824 | 0.6694352 |
| Q9CQC8 | Spg21   | 0.8064987 | 1.9850717 | 0.696669  | 0.8900083 | 1.7594707 | 1.8816523 | 0.3858424 | 0.6611124 |
| Q9JIA7 | Sphk2   | 0.0943195 | 0.8983181 | 0.9193245 | 0.9048359 | 0.250667  | 0.9120893 | 0.7926672 | 0.7439428 |
| Q52KF3 | Spire1  | 0.0489111 | 0.3601282 | 0.8957902 | 0.9015905 | -0.408232 | 0.9511447 | 0.682761  | 0.7239064 |
| A2AP58 | Spnb5   | -0.104484 | 0.288467  | 0.7278876 | 0.8916132 | -0.215141 | 0.1886252 | 0.2975198 | 0.6540599 |
| Q9WTK8 | Spo11   | -0.279924 | 0.8655019 | 0.7558218 | 0.8923639 | 0.336526  | 0.5775617 | 0.581338  | 0.7031064 |
| Q62288 | Spock1  | -0.352981 | 0.392847  | 0.3987588 | 0.8743196 | -0.499229 | 0.3838127 | 0.2410776 | 0.6491941 |
| Q64105 | Spr     | -0.171398 | 0.2933651 | 0.560718  | 0.8753373 | -0.361435 | 0.2896753 | 0.2163499 | 0.6434585 |
| Q62266 | Sprr1a  | -0.470946 | 2.0806335 | 0.8239866 | 0.8943678 | 1.0946718 | 1.8266347 | 0.5592837 | 0.6984692 |
| Q91WK1 | Spryd4  | 0.26337   | 0.6074409 | 0.6776464 | 0.8900083 | 1.8416118 | 0.5846362 | 0.0198144 | 0.6209341 |
| O88838 | Spsb2   | 1.5135339 | 0.8096807 | 0.1037849 | 0.8743196 | 1.344773  | 0.8285306 | 0.1556982 | 0.6211692 |
| P08032 | Spta1   | 0.254094  | 0.9435444 | 0.7954661 | 0.8943678 | -1.674448 | 1.9452852 | 0.422422  | 0.6694352 |
| P16546 | Sptan1  | 0.5009554 | 0.5234065 | 0.3444096 | 0.8743196 | 1.2088639 | 0.4633905 | 0.0134088 | 0.6209341 |
| P15508 | Sptb    | -0.229211 | 0.7006148 | 0.7531151 | 0.8923639 | -0.785118 | 0.8623423 | 0.3976858 | 0.6619029 |
| Q62261 | Sptbn1  | 2.203613  | 1.2909926 | 0.1315993 | 0.8743196 | 2.7049784 | 1.2046997 | 0.0658604 | 0.6209341 |
| Q8BG54 | Sptlc3  | -0.003779 | 0.6985548 | 0.9958348 | 0.9101811 | 1.4584951 | 0.4473323 | 0.0172395 | 0.6209341 |
| Q68FG3 | Spty2d1 | -0.442282 | 0.8034156 | 0.5990946 | 0.8772764 | 0.1813455 | 0.2673636 | 0.5228823 | 0.6929797 |
| Q9R112 | Sqrdl   | 0.3818312 | 0.3981611 | 0.3449857 | 0.8743196 | 0.6918892 | 0.4642346 | 0.1477133 | 0.6209341 |
| Q80VJ2 | Sra1    | -0.205289 | 0.7801275 | 0.8000137 | 0.8943678 | -0.195686 | 0.6654361 | 0.7786109 | 0.7430065 |
| Q9QWI6 | Srcin1  | 3.9420919 | 4.3284128 | 0.3927094 | 0.8743196 | 6.2317211 | 4.4617839 | 0.2119859 | 0.6429844 |
| Q68FF9 | Srd5a1  | -1.469572 | 1.8797864 | 0.4599669 | 0.8743196 | 0.3732976 | 1.3028327 | 0.7841106 | 0.7439428 |
| Q91Z67 | Srgap2  | 0.1242298 | 1.0798867 | 0.9116441 | 0.9048359 | -1.662177 | 1.7684121 | 0.3835371 | 0.6606339 |
| Q812A2 | Srgap3  | -0.436607 | 0.3397271 | 0.2182234 | 0.8743196 | -0.172654 | 0.2875338 | 0.5585199 | 0.6980496 |
| Q6P069 | Sri     | 0.4444783 | 0.6336567 | 0.4900597 | 0.8743196 | 0.7384971 | 0.5403462 | 0.1868845 | 0.6405321 |
| Q7TQ48 | Srl     | -0.085597 | 0.34672   | 0.8059225 | 0.8943678 | -0.359516 | 0.5631394 | 0.5262393 | 0.69337   |
| Q64674 | Srm     | 0.2424066 | 0.4053982 | 0.554219  | 0.8753373 | -0.180149 | 0.4910118 | 0.7165589 | 0.7303836 |
| P16254 | Srp14   | -1.51386  | 0.9641072 | 0.1603559 | 0.8743196 | -0.500603 | 0.9045675 | 0.5999767 | 0.7062306 |
| P14576 | Srp54   | -0.282029 | 0.4886914 | 0.5724247 | 0.8753373 | -0.854567 | 0.635132  | 0.2014652 | 0.6429844 |
| Q8BMA6 | Srp68   | -0.498348 | 0.3272527 | 0.141435  | 0.8743196 | -0.475138 | 0.439685  | 0.2927197 | 0.6532982 |
| P49962 | Srp9    | -1.181715 | 1.5709238 | 0.4764337 | 0.8743196 | 1.0921233 | 1.1098139 | 0.3630883 | 0.6594641 |
| P47758 | Srprb   | 0.2201241 | 0.6216228 | 0.7336816 | 0.8923639 | -1.865565 | 1.5371074 | 0.270471  | 0.6500471 |
| Q9R0M3 | Srpx    | -2.362314 | 4.6837737 | 0.6294923 | 0.8854638 | -10.16689 | 3.3888352 | 0.0240047 | 0.6209341 |
| Q9QZX7 | Srr     | -0.058303 | 0.5658012 | 0.9208179 | 0.9048359 | -0.368644 | 0.3946522 | 0.3863033 | 0.6611124 |
| Q52KI8 | Srrm1   | 0.9634941 | 0.7188478 | 0.2220055 | 0.8743196 | -1.167177 | 1.6229786 | 0.4990829 | 0.6823283 |

|        |            |           |           |           |           |           |           |           |           |
|--------|------------|-----------|-----------|-----------|-----------|-----------|-----------|-----------|-----------|
| Q8BTI8 | Srrm2      | 0.6168639 | 0.4604992 | 0.1901285 | 0.8743196 | -0.268235 | 0.5272054 | 0.6150348 | 0.7084882 |
| Q8BKA3 | Srrm4      | 1.4072969 | 1.0448072 | 0.2199718 | 0.8743196 | 0.9457393 | 1.1913007 | 0.4575092 | 0.6712964 |
| Q99MR6 | Srrt       | 0.0532325 | 0.9510542 | 0.9569281 | 0.9063776 | -0.733175 | 1.0141066 | 0.4968974 | 0.6823283 |
| Q6PDM2 | Srsf1      | 1.0001071 | 1.2752076 | 0.4585944 | 0.8743196 | 0.1606194 | 1.428957  | 0.91417   | 0.7627031 |
| Q62093 | Srsf2      | -0.423788 | 0.9162204 | 0.6577287 | 0.8900083 | -1.580519 | 1.1765598 | 0.2277397 | 0.6442378 |
| P84104 | Srsf3      | 2.1260247 | 1.3548056 | 0.1605799 | 0.8743196 | 2.8106783 | 1.3152536 | 0.076468  | 0.6209341 |
| O35326 | Srsf5      | 0.3766063 | 0.4243102 | 0.4042338 | 0.8743196 | 0.47924   | 0.2534676 | 0.1075425 | 0.6209341 |
| P32067 | Ssb        | 1.9142088 | 0.9003023 | 0.0710695 | 0.8743196 | 0.0072118 | 1.0868307 | 0.9949207 | 0.7793235 |
| Q76179 | Ssh1       | 0.6232124 | 0.7951781 | 0.4588861 | 0.8743196 | 0.8631493 | 0.8744158 | 0.361705  | 0.6594641 |
| Q5SW75 | Ssh2       | -0.576047 | 1.6240824 | 0.7332664 | 0.8923639 | 1.3902018 | 0.9200566 | 0.1815388 | 0.6395902 |
| Q8K330 | Ssh3       | -1.024534 | 0.6997415 | 0.1865616 | 0.8743196 | -0.261973 | 0.2775901 | 0.3817355 | 0.6606339 |
| Q3UN54 | Sslp1      | -0.275345 | 0.353783  | 0.4618915 | 0.8743196 | -0.530901 | 0.2359368 | 0.0654248 | 0.6209341 |
| Q8CG65 | Sspo       | 1.9458915 | 0.6384479 | 0.0186397 | 0.8743196 | -0.878352 | 0.9380562 | 0.385231  | 0.6611124 |
| Q9CY50 | Ssr1       | 0.7876999 | 0.6876497 | 0.2637835 | 0.8743196 | 0.9779398 | 0.7725788 | 0.2201275 | 0.6434585 |
| Q9DCF9 | Ssr3       | -1.101912 | 0.3147962 | 0.0099877 | 0.8743196 | -1.770004 | 1.4411198 | 0.265356  | 0.6500471 |
| Q62186 | Ssr4       | 0.7217188 | 0.4305    | 0.1143583 | 0.8743196 | 0.5032394 | 0.6160152 | 0.4286877 | 0.6694352 |
| Q08943 | Ssrp1      | 0.5504671 | 0.6164    | 0.4014953 | 0.8743196 | 1.0555174 | 0.6850056 | 0.1742768 | 0.6342694 |
| Q99L47 | St13       | -0.897618 | 0.8287359 | 0.2842818 | 0.8743196 | -1.373707 | 0.8833678 | 0.1276134 | 0.6209341 |
| Q924W7 | St5        | -6.692712 | 4.341738  | 0.1671013 | 0.8743196 | 0.8881477 | 4.786049  | 0.8588963 | 0.7556239 |
| P70277 | St6galnac2 | 0.372731  | 0.1902511 | 0.0909331 | 0.8743196 | -0.554544 | 0.4049978 | 0.2199602 | 0.6434585 |
| O35696 | St8sia2    | -0.02226  | 0.3489861 | 0.9509246 | 0.9060514 | 0.0201898 | 0.4548988 | 0.9660393 | 0.7740441 |
| Q8R4U0 | Stab2      | -1.461588 | 1.5459055 | 0.3542529 | 0.8743196 | -0.221512 | 1.3444513 | 0.8707866 | 0.7571111 |
| Q9D3E6 | Stag1      | 0.2282817 | 0.6095579 | 0.713271  | 0.8910745 | 0.4508706 | 0.8036836 | 0.5843349 | 0.7048643 |
| O35638 | Stag2      | 0.1311146 | 0.9806006 | 0.897396  | 0.9017905 | 0.8786173 | 0.8191316 | 0.3246761 | 0.6594641 |
| P70297 | Stam       | 0.0058931 | 0.4120043 | 0.9889871 | 0.9092148 | -0.42612  | 0.7746283 | 0.6021142 | 0.7069776 |
| Q9CQ26 | Stambp     | 0.6510427 | 0.9881694 | 0.5310667 | 0.8753373 | 1.3251515 | 1.0636412 | 0.2592558 | 0.6500471 |
| Q9JMD3 | Stard10    | 0.4569604 | 0.3506681 | 0.1967462 | 0.8743196 | 0.3882729 | 0.3946136 | 0.3289732 | 0.6594641 |
| Q923Q2 | Stard13    | -0.553429 | 0.6561659 | 0.4268667 | 0.8743196 | -0.640549 | 0.8606135 | 0.4848171 | 0.6796099 |
| Q99JV5 | Stard4     | 0.8047285 | 0.7357234 | 0.3102507 | 0.8743196 | 1.5374211 | 0.5331983 | 0.0279335 | 0.6209341 |
| Q9EPQ7 | Stard5     | 0.5027627 | 0.5168962 | 0.363127  | 0.8743196 | 0.2232972 | 0.5194844 | 0.682318  | 0.7239064 |
| Q8K031 | Stard8     | 1.1965573 | 1.0502057 | 0.2920379 | 0.8743196 | 0.9037553 | 1.277793  | 0.5059222 | 0.6836804 |
| Q80TF6 | Stard9     | -0.008332 | 0.4819871 | 0.9864352 | 0.9080307 | -0.075913 | 0.5015991 | 0.88203   | 0.7585208 |
| P42225 | Stat1      | -0.674067 | 0.4735484 | 0.1750761 | 0.8743196 | -0.429542 | 0.5565533 | 0.4540406 | 0.6712964 |
| P42227 | Stat3      | -1.493222 | 1.065265  | 0.2037433 | 0.8743196 | -1.101241 | 1.1893003 | 0.3901927 | 0.6611124 |
| P52633 | Stat6      | 2.0505143 | 1.1510863 | 0.1180577 | 0.8743196 | 2.6712375 | 1.1230132 | 0.0548703 | 0.6209341 |
| Q8C7E7 | Stbd1      | -0.615361 | 0.4890051 | 0.2157307 | 0.8743196 | 0.1192226 | 0.3568133 | 0.7403325 | 0.7346307 |
| Q9CWR7 | Steap1     | -1.776513 | 1.9447451 | 0.39136   | 0.8743196 | -0.651397 | 1.4803435 | 0.6753229 | 0.7239064 |
| Q923B6 | Steap4     | 0.4659196 | 0.5411308 | 0.4027857 | 0.8743196 | -1.136285 | 0.5515288 | 0.0599776 | 0.6209341 |
| Q60988 | Stil       | 2.9579884 | 1.924686  | 0.1451491 | 0.8743196 | 1.8353264 | 2.338057  | 0.4465358 | 0.6699704 |
| P70302 | Stim1      | -0.716456 | 0.6193882 | 0.2654784 | 0.8743196 | -0.244317 | 0.3296541 | 0.4717896 | 0.6770544 |
| P83093 | Stim2      | -1.293252 | 1.0057722 | 0.2394007 | 0.8743196 | -0.26628  | 0.131492  | 0.0892718 | 0.6209341 |
| Q60864 | Stip1      | -0.098589 | 0.1703272 | 0.5633408 | 0.8753373 | -0.24562  | 0.2201487 | 0.2660302 | 0.6500471 |
| Q99MW1 | Stk31      | -0.127538 | 0.5546193 | 0.8247015 | 0.8943678 | -0.612261 | 0.9713754 | 0.5517304 | 0.6980496 |
| Q9Z1W9 | Stk39      | -0.01977  | 0.5809405 | 0.9733014 | 0.9072902 | -0.790317 | 0.5194501 | 0.1520931 | 0.6211692 |
| Q9J111 | Stk4       | 0.5232595 | 0.8504419 | 0.5578351 | 0.8753373 | -2.296665 | 1.1187533 | 0.085899  | 0.6209341 |
| P54227 | Stmn1      | -0.732287 | 0.6566366 | 0.2733318 | 0.8743196 | -0.15635  | 0.5059834 | 0.7596924 | 0.7380771 |
| P55821 | Stmn2      | -0.281839 | 0.8225961 | 0.7419413 | 0.8923639 | -0.742128 | 0.969924  | 0.4731998 | 0.6774295 |
| Q99JB2 | Stoml2     | -0.485318 | 0.5630441 | 0.41726   | 0.8743196 | -1.277393 | 0.4105161 | 0.0208044 | 0.6209341 |
| Q6PE84 | Stoml3     | -0.401954 | 0.8586389 | 0.6539179 | 0.8900083 | -1.15916  | 0.4356677 | 0.0374914 | 0.6209341 |
| Q8C8J0 | Stpg2      | 1.8448125 | 1.5525596 | 0.2532128 | 0.8743196 | 2.4527745 | 1.6503412 | 0.1610655 | 0.6261551 |
| Q9Z1Z2 | Strap      | 0.1115396 | 0.3053791 | 0.7161486 | 0.8910745 | 0.1284966 | 0.3286421 | 0.6973133 | 0.7265263 |
| P46978 | Stt3a      | -0.513159 | 0.3588376 | 0.1661451 | 0.8743196 | -0.335078 | 0.3354777 | 0.3298191 | 0.6594641 |
| Q3TDQ1 | Stt3b      | -0.71349  | 0.6095217 | 0.2800737 | 0.8743196 | -0.518408 | 0.3045152 | 0.1395753 | 0.6209341 |
| Q9WUD1 | Stub1      | -1.921507 | 0.7219711 | 0.0177788 | 0.8743196 | 0.1208624 | 0.6243184 | 0.8494882 | 0.7537615 |
| Q8VDS8 | Stx18      | 0.5201302 | 0.3215479 | 0.1497857 | 0.8743196 | 0.4351524 | 0.3889348 | 0.305994  | 0.6553142 |
| Q9JKK1 | Stx6       | -0.181242 | 0.6416626 | 0.785763  | 0.8943678 | -0.349264 | 0.5060345 | 0.5158644 | 0.6908505 |
| Q9WV89 | Stxbp4     | -0.312145 | 0.6416865 | 0.641511  | 0.8891711 | -0.364897 | 0.6217155 | 0.5786565 | 0.7021424 |
| Q8R3T5 | Stxbp6     | -0.850348 | 1.0977966 | 0.4639343 | 0.8743196 | -0.853708 | 0.7287908 | 0.2858446 | 0.6518056 |
| Q9Z219 | Sucla2     | 0.0459017 | 0.3201427 | 0.8861725 | 0.9006736 | 0.4246448 | 0.3264609 | 0.1954955 | 0.6424737 |
| Q9WUM5 | Suc1g1     | -0.129242 | 0.3146061 | 0.682609  | 0.8900083 | -0.043159 | 0.334436  | 0.8977893 | 0.7608548 |
| Q9Z218 | Suc1g2     | -0.03489  | 0.1691624 | 0.8368455 | 0.8943678 | -0.352327 | 0.187519  | 0.0622537 | 0.6209341 |

|        |          |           |           |           |           |           |           |           |           |
|--------|----------|-----------|-----------|-----------|-----------|-----------|-----------|-----------|-----------|
| Q9CX34 | Sugt1    | -2.518856 | 1.3378764 | 0.1017573 | 0.8743196 | -0.725415 | 0.759159  | 0.3761976 | 0.6594641 |
| P52840 | Sult1a1  | -0.452264 | 0.3222863 | 0.1684396 | 0.8743196 | -0.508101 | 0.3312746 | 0.1343387 | 0.6209341 |
| Q9QWG7 | Sult1b1  | -0.045105 | 0.5710529 | 0.9377269 | 0.9048359 | 0.1520951 | 0.6143885 | 0.8070022 | 0.745845  |
| Q80VR3 | Sult1c1  | -1.766115 | 0.8173175 | 0.0675213 | 0.8743196 | -0.649741 | 0.8032791 | 0.449471  | 0.6701719 |
| Q3UZZ6 | Sult1d1  | -0.412616 | 0.3630298 | 0.2614718 | 0.8743196 | -1.048168 | 0.3951666 | 0.0113126 | 0.6209341 |
| O35400 | Sult2b1  | 1.1362077 | 1.0234178 | 0.3035847 | 0.8743196 | 1.2759431 | 1.1419833 | 0.3065966 | 0.6553142 |
| P61957 | Sumo2    | 1.2738162 | 0.6424777 | 0.0660283 | 0.8743196 | 0.253188  | 1.3280469 | 0.8517473 | 0.7537615 |
| Q8R086 | Suox     | -0.290835 | 0.2936958 | 0.3263834 | 0.8743196 | -0.378027 | 0.3137771 | 0.2342018 | 0.6442378 |
| O55201 | Supt5h   | 0.239578  | 0.84058   | 0.7838807 | 0.8942061 | -1.458806 | 2.2405798 | 0.5391123 | 0.6969343 |
| Q62383 | Supt6h   | -0.200479 | 0.4276358 | 0.6534569 | 0.8900083 | 0.5591454 | 0.2789474 | 0.091854  | 0.6209341 |
| Q64310 | Surf4    | 1.4669425 | 0.9506168 | 0.1667032 | 0.8743196 | 0.9394215 | 0.9249516 | 0.3489905 | 0.6594641 |
| P70279 | Surf6    | 0.0657257 | 1.0302445 | 0.9509161 | 0.9060514 | 1.1851649 | 0.6165289 | 0.1029347 | 0.6209341 |
| Q9D176 | Susd3    | 1.5695094 | 1.5767509 | 0.3526943 | 0.8743196 | 3.6061899 | 1.3321885 | 0.0352479 | 0.6209341 |
| Q9EQQ0 | Suv39h2  | -0.292612 | 0.6225578 | 0.6526351 | 0.8900083 | -0.673326 | 0.8739337 | 0.4702694 | 0.6757189 |
| Q80U70 | Suz12    | 0.2036475 | 0.5614629 | 0.7275268 | 0.891572  | -1.447859 | 0.6473465 | 0.0666575 | 0.6209341 |
| A2AVA0 | Svep1    | -0.523068 | 0.8686001 | 0.5560377 | 0.8753373 | 1.2628603 | 0.5550597 | 0.0404786 | 0.6209341 |
| Q8K4L3 | Svil     | -0.121463 | 0.4240104 | 0.7784419 | 0.8940257 | -0.385912 | 0.2720658 | 0.1795851 | 0.6381812 |
| Q6PDF3 | Svopl    | 0.7599584 | 0.4014802 | 0.1002483 | 0.8743196 | -0.792082 | 0.8631365 | 0.394179  | 0.6617584 |
| Q6A028 | Swap70   | -0.541356 | 0.9046365 | 0.5684071 | 0.8753373 | 0.4944784 | 0.5931898 | 0.4364317 | 0.6699704 |
| Q9D5V6 | Syap1    | -1.400266 | 0.4882286 | 0.0240588 | 0.8743196 | -0.384261 | 0.5406171 | 0.5038984 | 0.6828196 |
| Q8BHS8 | Sybu     | 0.1010291 | 0.5704159 | 0.8644341 | 0.8974757 | -1.474994 | 1.3605367 | 0.3199382 | 0.6594641 |
| Q9CUU3 | Sycp2    | 0.6691604 | 0.4729537 | 0.2000197 | 0.8743196 | -0.797852 | 1.0650013 | 0.4820904 | 0.6796099 |
| D3YVW8 | Sycp2l   | -0.000226 | 0.0046407 | 0.9624608 | 0.9067461 | -0.001245 | 0.0033283 | 0.721267  | 0.7303836 |
| Q9DBZ9 | Syde1    | -0.028297 | 0.9372032 | 0.9767557 | 0.9072902 | 1.0163003 | 1.0265033 | 0.3603756 | 0.6594641 |
| Q64332 | Syn2     | 0.4693435 | 0.5512159 | 0.4226779 | 0.8743196 | 0.7878752 | 0.515749  | 0.1774627 | 0.6355136 |
| Q7TMK9 | Syncrip  | -0.270953 | 0.3738422 | 0.4716591 | 0.8743196 | -0.311031 | 0.4037936 | 0.4449134 | 0.6699704 |
| Q6ZWR6 | Syne1    | -0.649212 | 1.1059902 | 0.5756407 | 0.8753373 | -1.921628 | 1.0850022 | 0.1269338 | 0.6209341 |
| Q6ZWQ0 | Syne2    | -0.060497 | 0.3251473 | 0.8536107 | 0.8962775 | 0.114415  | 0.3715802 | 0.7605101 | 0.7380771 |
| F6SEU4 | Syngap1  | 2.1721535 | 0.7293138 | 0.0205628 | 0.8743196 | 0.7398584 | 1.3551979 | 0.6047952 | 0.7081806 |
| B0QZP8 | Syngr2   | -1.137358 | 0.8390185 | 0.2173401 | 0.8743196 | -0.216256 | 0.5103356 | 0.6865175 | 0.7242619 |
| Q9D2G5 | Synj2    | -0.34748  | 0.3447186 | 0.347015  | 0.8743196 | 0.0276303 | 0.2600766 | 0.9188558 | 0.7627031 |
| Q9D6K5 | Synj2bp  | -0.424237 | 0.3635146 | 0.2814059 | 0.8743196 | -0.601108 | 0.2400676 | 0.0462828 | 0.6209341 |
| Q70IV5 | Synm     | 0.3786207 | 0.2174202 | 0.1020727 | 0.8743196 | -0.157632 | 0.43937   | 0.7255287 | 0.7310023 |
| F6YUG5 | Synrg    | -0.890773 | 0.9850389 | 0.3958899 | 0.8743196 | -0.855025 | 0.3622147 | 0.0562421 | 0.6209341 |
| O09117 | Sypl1    | 0.2017952 | 0.4680921 | 0.679359  | 0.8900083 | -0.265505 | 0.8619965 | 0.7684861 | 0.7405762 |
| P46096 | Syt1     | 1.4382769 | 1.897355  | 0.4731684 | 0.8743196 | 0.9817947 | 2.3083142 | 0.6854287 | 0.724036  |
| Q9R0N4 | Syt10    | 0.4401425 | 0.2826325 | 0.1402446 | 0.8743196 | 0.3225325 | 0.29068   | 0.2872843 | 0.6518981 |
| Q9R0N3 | Syt11    | -2.642417 | 1.5716254 | 0.1365837 | 0.8743196 | 1.0263671 | 0.5430339 | 0.107643  | 0.6209341 |
| Q920N7 | Syt12    | -0.168684 | 0.7571973 | 0.8267162 | 0.8943678 | 0.2685056 | 0.8315157 | 0.7518976 | 0.7375672 |
| Q7TN84 | Syt14    | 1.4292173 | 0.7983603 | 0.1165452 | 0.8743196 | -1.983606 | 1.602955  | 0.2621419 | 0.6500471 |
| Q6NXN1 | Szrd1    | -1.012993 | 0.2436657 | 0.0042561 | 0.8743196 | -2.892904 | 1.6418752 | 0.1285477 | 0.6209341 |
| P54797 | T10      | -0.050123 | 0.5021008 | 0.9218039 | 0.9048359 | 0.2850065 | 0.6485632 | 0.667557  | 0.7215904 |
| Q5QD17 | Taar2    | 0.5810023 | 1.278326  | 0.663226  | 0.8900083 | 1.4363285 | 0.8767977 | 0.1525032 | 0.6211692 |
| Q99K90 | Tab2     | -0.133411 | 0.1821785 | 0.4877702 | 0.8743196 | -0.153621 | 0.1053124 | 0.1949234 | 0.6418859 |
| E9Q8T1 | Tacc2    | 0.8598528 | 0.721547  | 0.251901  | 0.8743196 | 0.9834858 | 0.7120796 | 0.1905144 | 0.6405321 |
| Q8K0Z7 | Taco1    | -0.344952 | 0.418448  | 0.4160333 | 0.8743196 | 0.0242642 | 0.2490426 | 0.9231046 | 0.7634741 |
| Q80UV9 | Taf1     | -0.066632 | 0.5503852 | 0.907042  | 0.9048359 | -0.813318 | 0.5589198 | 0.1958663 | 0.6426154 |
| Q99JX1 | Taf11    | -0.395965 | 0.366309  | 0.315544  | 0.8743196 | -0.650234 | 0.5321715 | 0.2675858 | 0.6500471 |
| Q8C092 | Taf5     | -1.030054 | 0.9100825 | 0.2949863 | 0.8743196 | -0.912625 | 0.5931466 | 0.1748189 | 0.6347112 |
| Q8VI33 | Taf9     | -0.91966  | 1.4707315 | 0.5516013 | 0.8753373 | -0.572577 | 1.0236527 | 0.5961705 | 0.7056501 |
| P37804 | Tagln    | 0.1996159 | 0.6871643 | 0.7754173 | 0.8940257 | 0.78352   | 0.4079625 | 0.0769925 | 0.6209341 |
| Q9WVA4 | Tagln2   | 0.1023044 | 0.4960972 | 0.8393932 | 0.8951804 | 0.8217601 | 0.5914448 | 0.1880467 | 0.6405321 |
| Q93092 | Taldo1   | 0.039665  | 0.2954069 | 0.8934303 | 0.9006736 | -0.207758 | 0.3292367 | 0.5295045 | 0.6933955 |
| Q5F2E8 | Taok1    | 0.9142207 | 0.4741398 | 0.0951788 | 0.8743196 | 0.9509389 | 0.5310961 | 0.1235637 | 0.6209341 |
| Q8BYC6 | Taok3    | 0.7170091 | 0.8832078 | 0.4436186 | 0.8743196 | -0.867624 | 1.1311645 | 0.4721627 | 0.6771465 |
| Q921F2 | Tardbp   | 0.3669876 | 0.6032235 | 0.552039  | 0.8753373 | 0.2308254 | 0.8153675 | 0.7815628 | 0.7436402 |
| Q9D0R2 | Tars     | -0.224797 | 0.2178085 | 0.3035983 | 0.8743196 | -0.224363 | 0.2032495 | 0.2715526 | 0.6500471 |
| Q3UQ84 | Tars2    | -1.265438 | 1.155988  | 0.3098868 | 0.8743196 | -0.721334 | 1.2901255 | 0.5963164 | 0.7056501 |
| Q7M715 | Tas2r117 | 1.390272  | 0.9445741 | 0.1845379 | 0.8743196 | 1.8873073 | 1.0078391 | 0.1102764 | 0.6209341 |
| P59528 | Tas2r123 | -0.548831 | 0.9741596 | 0.590752  | 0.8753373 | 0.1743888 | 0.5652419 | 0.7681173 | 0.7405059 |
| Q8QZR1 | Tat      | 1.8997764 | 1.0270986 | 0.1068214 | 0.8743196 | 1.4334097 | 1.2312046 | 0.2885245 | 0.652142  |

|        |         |           |           |           |           |           |           |           |           |
|--------|---------|-----------|-----------|-----------|-----------|-----------|-----------|-----------|-----------|
| Q3U1C6 | Tatdn3  | -0.673088 | 1.285203  | 0.6166392 | 0.8816934 | -0.160696 | 0.986901  | 0.8759989 | 0.7581843 |
| Q9D9I4 | Tbc1d20 | 0.060812  | 0.6111749 | 0.9235308 | 0.9048359 | -0.410501 | 0.9237113 | 0.6723309 | 0.7227095 |
| A1A5B6 | Tbc1d25 | 0.8060872 | 0.6070391 | 0.225873  | 0.8743196 | 0.7791026 | 0.6096423 | 0.248474  | 0.6500471 |
| Q3U0J8 | Tbc1d2b | -0.673589 | 0.4841007 | 0.1843901 | 0.8743196 | -0.669906 | 0.3505004 | 0.0782668 | 0.6209341 |
| Q8BYJ6 | Tbc1d4  | 1.1118099 | 0.9349761 | 0.2731561 | 0.8743196 | 1.7734606 | 1.1831245 | 0.1845411 | 0.6405321 |
| Q9D0K0 | Tbc1d7  | -0.948374 | 0.6676544 | 0.1759269 | 0.8743196 | -0.05145  | 0.1876366 | 0.78824   | 0.7439428 |
| A3KGB4 | Tbc1d8b | -0.595654 | 0.5915705 | 0.3475116 | 0.8743196 | -0.896674 | 1.103643  | 0.4475522 | 0.6701628 |
| P48428 | Tbca    | -0.135357 | 0.3038232 | 0.6579939 | 0.8900083 | -0.009667 | 0.2790048 | 0.9725292 | 0.7753815 |
| Q9D1E6 | Tbcb    | -0.924634 | 0.7600931 | 0.2361409 | 0.8743196 | -0.50248  | 0.7151056 | 0.4903632 | 0.6804142 |
| Q8BYA0 | Tbcd    | 0.279039  | 0.6878018 | 0.6906934 | 0.8900083 | 0.4075277 | 0.651998  | 0.5427582 | 0.6979269 |
| Q8C5W3 | Tbcel   | -0.039093 | 0.4822384 | 0.9358038 | 0.9048359 | -0.030836 | 0.4230716 | 0.9423231 | 0.7690587 |
| A2A9T0 | Tbkbp1  | -1.657462 | 1.3369125 | 0.255008  | 0.8743196 | -0.117527 | 0.1798371 | 0.5376464 | 0.695758  |
| Q8C4J7 | Tbl3    | 0.2061465 | 1.0572645 | 0.8509463 | 0.8962775 | -0.021667 | 1.1891459 | 0.9860539 | 0.7775007 |
| P29037 | Tbp     | -0.866239 | 0.4914803 | 0.1213565 | 0.8743196 | -1.713634 | 0.6527275 | 0.0393039 | 0.6209341 |
| Q91YM4 | Tbrg4   | -0.946434 | 0.635846  | 0.1573496 | 0.8743196 | -0.039468 | 0.3097294 | 0.9005517 | 0.7610813 |
| P70323 | Tbx1    | -0.096544 | 0.171154  | 0.5903099 | 0.8753373 | -0.305701 | 0.1569346 | 0.0993411 | 0.6209341 |
| Q99ME7 | Tbx19   | 0.2782152 | 0.8141034 | 0.7425733 | 0.8923639 | 1.413939  | 0.5689487 | 0.0474712 | 0.6209341 |
| Q9JKD8 | Tbx21   | -0.50435  | 0.4477764 | 0.2971473 | 0.8743196 | -0.801928 | 0.9504829 | 0.4311796 | 0.6694352 |
| P36423 | Tbxas1  | -0.475119 | 0.7172686 | 0.5289124 | 0.8753373 | -1.135951 | 1.1698264 | 0.3690285 | 0.6594641 |
| P83940 | Tceb1   | -0.67608  | 0.5560708 | 0.2332324 | 0.8743196 | -0.320237 | 0.4748799 | 0.5058193 | 0.6836804 |
| P62869 | Tceb2   | 0.242192  | 1.2713473 | 0.8543242 | 0.8965984 | 0.855154  | 0.9272739 | 0.3919866 | 0.6614867 |
| Q8CB77 | Tceb3   | -1.252555 | 0.3428456 | 0.0081411 | 0.8743196 | 0.1285056 | 0.5658927 | 0.8278974 | 0.7512721 |
| Q3ULV5 | Tcf4    | 0.9933458 | 0.6544011 | 0.172819  | 0.8743196 | 0.6976888 | 0.7331458 | 0.3780253 | 0.6594641 |
| O08784 | Tcof1   | 1.0069253 | 0.8859145 | 0.2931161 | 0.8743196 | 0.6826608 | 0.8940133 | 0.4740564 | 0.6774295 |
| P11983 | Tcp1    | 0.3777163 | 0.2757099 | 0.1726254 | 0.8743196 | 0.5350798 | 0.2956648 | 0.0724949 | 0.6209341 |
| P48776 | Tdo2    | 1.0941697 | 0.4886451 | 0.0351078 | 0.8743196 | 0.1991273 | 0.9179863 | 0.8304701 | 0.7517136 |
| Q717B3 | Tdpoz1  | 1.2208572 | 0.6432109 | 0.0994884 | 0.8743196 | 1.0434697 | 1.22965   | 0.4286592 | 0.6694352 |
| Q9CWU0 | Tdrd12  | 1.4035992 | 1.2704556 | 0.2866533 | 0.8743196 | 1.5001595 | 1.4009053 | 0.3037159 | 0.6540599 |
| Q80VL1 | Tdrkh   | 0.7943207 | 0.832745  | 0.3719249 | 0.8743196 | -1.10461  | 1.0366166 | 0.3275985 | 0.6594641 |
| P30051 | Tead1   | -0.341497 | 0.8613297 | 0.6973369 | 0.8900083 | 0.6352517 | 0.8297041 | 0.457569  | 0.6712964 |
| P48301 | Tead2   | -0.086018 | 0.4024239 | 0.836835  | 0.8943678 | -0.118289 | 0.2491656 | 0.6517593 | 0.7192628 |
| Q80VP0 | Tecpr1  | 1.899924  | 1.2121015 | 0.1609918 | 0.8743196 | 1.0109408 | 1.3332183 | 0.4770065 | 0.6786617 |
| Q9CY27 | Tecr    | 0.2468772 | 0.339068  | 0.4720136 | 0.8743196 | -0.01145  | 0.4021657 | 0.9774962 | 0.7762206 |
| O08523 | Tecta   | -1.16134  | 0.9810239 | 0.2549118 | 0.8743196 | -0.065794 | 0.3586266 | 0.8572677 | 0.7556239 |
| Q5SSK3 | Tefm    | 2.4673131 | 1.5111907 | 0.1465519 | 0.8743196 | 0.6341089 | 1.607477  | 0.7068704 | 0.7282267 |
| Q9WTS4 | Tenm1   | 0.1151202 | 0.3211095 | 0.7305319 | 0.8923639 | -0.251038 | 0.5346348 | 0.6552552 | 0.7198872 |
| Q9WTS5 | Tenm2   | -2.080808 | 3.1279117 | 0.5272006 | 0.8753373 | -2.086007 | 3.6320483 | 0.5866133 | 0.7049451 |
| Q9WTS6 | Tenm3   | -0.650776 | 0.506194  | 0.2180679 | 0.8743196 | -1.900043 | 1.0291372 | 0.0877432 | 0.6209341 |
| P47226 | Tes     | 0.578735  | 1.6015241 | 0.7284873 | 0.8918508 | -0.316879 | 1.8809797 | 0.8717532 | 0.7571111 |
| D6RFP6 | Tesk1   | -1.250789 | 0.8666945 | 0.1921875 | 0.8743196 | -0.998784 | 0.8748973 | 0.2971242 | 0.6540599 |
| Q3URK3 | Tet1    | 1.2868775 | 1.4744426 | 0.396535  | 0.8743196 | 1.3588981 | 1.7010663 | 0.4387287 | 0.6699704 |
| Q4JK59 | Tet2    | -0.137442 | 0.7116661 | 0.8494502 | 0.8962775 | 0.1286791 | 0.5905884 | 0.8309031 | 0.7517136 |
| Q14AT2 | Tet11   | 1.9666679 | 0.989923  | 0.0873167 | 0.8743196 | -0.100566 | 1.5497584 | 0.9503686 | 0.7706093 |
| Q6ZPJ0 | Tex2    | -0.077722 | 0.0897147 | 0.415017  | 0.8743196 | -0.236293 | 0.2942609 | 0.4525999 | 0.6712964 |
| B1AYN9 | Tex28   | -1.869188 | 1.3284213 | 0.2022207 | 0.8743196 | -1.097058 | 0.6921314 | 0.1640495 | 0.6273856 |
| Q92111 | Tf      | 0.2039199 | 0.1296533 | 0.1166437 | 0.8743196 | -0.094304 | 0.147549  | 0.5232009 | 0.6929797 |
| P34056 | Tfap2a  | -0.622111 | 0.6397065 | 0.3632022 | 0.8743196 | -2.378346 | 1.6507492 | 0.1997261 | 0.6429844 |
| A2APA8 | Tfap2c  | 0.4982878 | 0.6678439 | 0.4798997 | 0.8743196 | -0.242812 | 1.0081845 | 0.8176974 | 0.7474231 |
| Q8JZM0 | Tfb1m   | -1.041727 | 0.6474143 | 0.1516391 | 0.8743196 | -0.675774 | 0.5928339 | 0.297778  | 0.6540599 |
| Q64092 | Tfe3    | 0.3703195 | 0.7250565 | 0.6252381 | 0.8826986 | -0.171926 | 0.8484804 | 0.8461225 | 0.7532788 |
| Q9ERA6 | Tfip11  | 1.0169739 | 0.8446303 | 0.2677012 | 0.8743196 | -0.735223 | 0.9755446 | 0.479577  | 0.6789818 |
| O08710 | Tg      | 1.9405037 | 1.0461245 | 0.0833654 | 0.8743196 | 2.843587  | 0.9661389 | 0.011419  | 0.6209341 |
| Q62312 | Tgfr2   | 0.5107301 | 0.754544  | 0.52022   | 0.8753373 | 0.3908329 | 0.5716972 | 0.5197186 | 0.6927469 |
| O88393 | Tgfr3   | -0.612499 | 1.6172035 | 0.7161071 | 0.8910745 | -1.682799 | 3.2528039 | 0.6234316 | 0.7111404 |
| Q3UR70 | Tgfrap1 | -0.357558 | 0.5580289 | 0.5420839 | 0.8753373 | -1.950966 | 1.2292569 | 0.1635848 | 0.6273856 |
| P21981 | Tgm2    | 0.3361105 | 0.1846425 | 0.070417  | 0.8743196 | 0.2140046 | 0.2006015 | 0.2877362 | 0.6518981 |
| Q9D7I9 | Tgm5    | 0.4473165 | 0.9309392 | 0.645525  | 0.8896469 | 0.8891427 | 0.8935032 | 0.358101  | 0.6594641 |
| Q923W1 | Tgs1    | -0.616636 | 0.3602366 | 0.1075334 | 0.8743196 | -0.569377 | 0.4770207 | 0.2539574 | 0.6500471 |
| Q6XPS7 | Tha1    | 0.7164339 | 0.9160577 | 0.4597974 | 0.8743196 | 0.1702426 | 0.9846095 | 0.8684124 | 0.7571111 |
| P15306 | Thbd    | -1.104285 | 0.8204402 | 0.2202715 | 0.8743196 | -0.622734 | 1.1805576 | 0.6167801 | 0.7091807 |
| P35441 | Thbs1   | -0.726997 | 0.4494695 | 0.1138407 | 0.8743196 | 0.1871567 | 0.376262  | 0.6221013 | 0.7103341 |

|         |          |           |           |           |           |           |           |           |           |
|---------|----------|-----------|-----------|-----------|-----------|-----------|-----------|-----------|-----------|
| Q05895  | Thbs3    | 0.1569248 | 0.4052832 | 0.7101126 | 0.8910745 | -2.290717 | 1.1051428 | 0.0835655 | 0.6209341 |
| Q91YX0  | Themis2  | -0.577253 | 1.3113093 | 0.6730565 | 0.8900083 | -1.580858 | 1.2006688 | 0.2360111 | 0.6442378 |
| Q80W22  | Thnsl2   | 0.0322845 | 0.3550732 | 0.9278838 | 0.9048359 | -0.094116 | 0.4075739 | 0.818361  | 0.7476698 |
| Q8C1A5  | Thop1    | -0.617274 | 0.6658557 | 0.3847553 | 0.8743196 | -0.171449 | 0.5572311 | 0.7687262 | 0.7406179 |
| Q62264  | Thrsp    | 0.5177932 | 0.3683535 | 0.1697583 | 0.8743196 | 0.1565563 | 0.3926135 | 0.6932105 | 0.7254379 |
| Q3UTY6  | Thsd4    | 0.0660645 | 0.3060103 | 0.8352298 | 0.8943678 | -0.256069 | 0.5773556 | 0.672935  | 0.7227095 |
| Q8BHP3  | Thsd7b   | -0.132187 | 0.7800289 | 0.8702245 | 0.898064  | 0.1456808 | 0.5569453 | 0.8023996 | 0.7442871 |
| Q99J36  | Thumpd1  | -4.240521 | 4.824362  | 0.4085692 | 0.8743196 | 5.9693298 | 4.1640956 | 0.201695  | 0.6429844 |
| Q9CZB3  | Thumpd2  | 1.0909725 | 0.9690777 | 0.2973687 | 0.8743196 | 1.1216764 | 1.0968184 | 0.3459176 | 0.6594641 |
| P97770  | Thumpd3  | 1.7433954 | 1.4138134 | 0.2573324 | 0.8743196 | 2.4299825 | 1.3265503 | 0.1166958 | 0.6209341 |
| P70318  | Tial1    | -0.4872   | 0.404577  | 0.2676378 | 0.8743196 | -0.328    | 0.1024422 | 0.0185577 | 0.6209341 |
| Q6ZPF3  | Tiam2    | 0.6983112 | 1.3166649 | 0.6036234 | 0.8792876 | 0.9607677 | 1.2194912 | 0.4449169 | 0.6699704 |
| Q80UF7  | Ticam1   | -1.018092 | 0.4351101 | 0.033533  | 0.8743196 | -0.455102 | 0.3641684 | 0.2334395 | 0.6442378 |
| Q8BQ33  | Ticrr    | 0.857508  | 0.6286046 | 0.2147585 | 0.8743196 | -1.276183 | 0.7934881 | 0.1588898 | 0.6240524 |
| Q06806  | Tie1     | -1.092704 | 1.4106278 | 0.4639193 | 0.8743196 | 0.1169896 | 0.6301672 | 0.8588375 | 0.7556239 |
| Q8BZA9  | Tigar    | -0.051157 | 0.5862617 | 0.93122   | 0.9048359 | -0.031976 | 0.5420302 | 0.9535425 | 0.7711907 |
| Q8BUZ3  | Tigd4    | -0.53808  | 1.5071707 | 0.7316019 | 0.8923639 | 0.485702  | 0.2754885 | 0.1283511 | 0.6209341 |
| Q8R183  | Timd2    | -0.790973 | 1.303313  | 0.5630796 | 0.8753373 | 1.1240997 | 0.581259  | 0.1012943 | 0.6209341 |
| P62073  | Timm10   | 2.5844911 | 1.4475181 | 0.1173537 | 0.8743196 | 1.5804617 | 1.788136  | 0.4107858 | 0.6675611 |
| P62075  | Timm13   | -0.796457 | 0.5235857 | 0.1418503 | 0.8743196 | -1.425451 | 0.8041271 | 0.0915162 | 0.6209341 |
| O35857  | Timm44   | 0.2095825 | 0.4515481 | 0.6446886 | 0.8896469 | -0.161085 | 0.4611205 | 0.7286259 | 0.7323934 |
| Q9D880  | Timm50   | -0.390104 | 0.5530731 | 0.5033875 | 0.8753373 | -1.807185 | 0.9928299 | 0.1185815 | 0.6209341 |
| Q9WVA2  | Timm8a1  | 0.2769958 | 0.6165901 | 0.6596826 | 0.8900083 | 0.5905247 | 0.7601893 | 0.4511733 | 0.6712964 |
| P62077  | Timm8b   | 0.4459079 | 0.6948665 | 0.5307415 | 0.8753373 | 0.8833964 | 0.708056  | 0.2341712 | 0.6442378 |
| Q9WV98  | Timm9    | -0.143868 | 0.3464518 | 0.68383   | 0.8900083 | -0.421096 | 0.1551526 | 0.0177121 | 0.6209341 |
| P12032  | Timp1    | 0.4799134 | 1.122143  | 0.6817362 | 0.8900083 | -0.209215 | 0.8850443 | 0.8209941 | 0.7484368 |
| Q8BH58  | Tiprl    | 1.67588   | 1.4725092 | 0.2925231 | 0.8743196 | 1.7484389 | 1.6526534 | 0.3307967 | 0.6594641 |
| P39447  | Tjp1     | -1.592654 | 1.3490398 | 0.2763245 | 0.8743196 | -0.412526 | 0.9169769 | 0.668596  | 0.7220514 |
| Q9Z0U1  | Tjp2     | -1.457142 | 1.0242894 | 0.1978528 | 0.8743196 | -0.210526 | 0.4692812 | 0.6694574 | 0.7222728 |
| Q9QXY1  | Tjp3     | -0.054897 | 0.7402102 | 0.9418594 | 0.9050667 | 0.5603418 | 0.7391148 | 0.461899  | 0.6725223 |
| P40142  | Tkt      | 0.0767109 | 0.2759172 | 0.7813098 | 0.8940257 | -0.172713 | 0.3024214 | 0.5687335 | 0.6997388 |
| Q99JT6  | Tlcd1    | -1.343014 | 1.1584336 | 0.2843325 | 0.8743196 | -0.36651  | 0.5328606 | 0.5172612 | 0.6910975 |
| Q9WVB2  | Tle2     | 0.656943  | 0.8641173 | 0.4719315 | 0.8743196 | -0.797428 | 1.4238986 | 0.5957318 | 0.7056501 |
| Q9WVB3  | Tle6     | 0.7030655 | 1.0129353 | 0.5099985 | 0.8753373 | -0.962435 | 1.1342285 | 0.4286871 | 0.6694352 |
| P26039  | Tln1     | 0.1619129 | 0.1778279 | 0.3638694 | 0.8743196 | 0.0224687 | 0.1948216 | 0.9083423 | 0.7612577 |
| Q71LX4  | Tln2     | 0.1743932 | 0.4327026 | 0.6896906 | 0.8900083 | 0.2904982 | 0.6673636 | 0.6668102 | 0.7215904 |
| Q6R5N8  | Tlr13    | -0.491386 | 0.6632894 | 0.4829005 | 0.8743196 | -0.264398 | 0.243895  | 0.319964  | 0.6594641 |
| Q9JLF7  | Tlr5     | -1.895238 | 0.7865111 | 0.0467961 | 0.8743196 | -0.982039 | 1.0330965 | 0.3785211 | 0.6594641 |
| Q8R1J1  | Tm6sf2   | -1.348206 | 0.6020976 | 0.0601505 | 0.8743196 | -0.567072 | 0.8135737 | 0.5118818 | 0.6874741 |
| Q71KT5  | Tm7sf2   | 0.1782653 | 0.4156338 | 0.674092  | 0.8900083 | -1.101093 | 0.3542028 | 0.0083072 | 0.6209341 |
| P58021  | Tm9sf2   | 0.9267261 | 1.0616256 | 0.4116419 | 0.8743196 | 1.7832961 | 0.9139349 | 0.0988903 | 0.6209341 |
| Q7TNQ65 | Tmc4     | -1.460154 | 1.1828241 | 0.2568599 | 0.8743196 | -1.634308 | 0.8968772 | 0.118256  | 0.6209341 |
| Q7T58   | Tmc8     | 0.7559826 | 0.8167566 | 0.3693112 | 0.8743196 | -0.106548 | 0.9909868 | 0.9160201 | 0.7627031 |
| Q91WU4  | Tmco4    | -0.510319 | 0.4959403 | 0.3377199 | 0.8743196 | -0.282281 | 0.1425297 | 0.0949571 | 0.6209341 |
| Q8BQX5  | Tmco6    | 1.3612023 | 1.1116847 | 0.2603872 | 0.8743196 | 1.1447005 | 1.275301  | 0.4039797 | 0.6641535 |
| Q8C3S2  | Tmco7    | -0.348863 | 0.6045059 | 0.5724289 | 0.8753373 | -0.125306 | 0.276725  | 0.6581442 | 0.7203181 |
| Q9D1D4  | Tmed10   | 0.2509255 | 0.5357    | 0.6427707 | 0.8891711 | 0.4676053 | 0.5344056 | 0.389291  | 0.6611124 |
| Q9R0Q3  | Tmed2    | -0.198084 | 0.6207759 | 0.7540582 | 0.8923639 | 0.3297763 | 0.8005114 | 0.6870828 | 0.7242619 |
| Q78IS1  | Tmed3    | 0.4613029 | 0.6802117 | 0.5194418 | 0.8753373 | -1.89149  | 0.8064244 | 0.0574085 | 0.6209341 |
| Q8R1V4  | Tmed4    | 1.0562076 | 0.8336579 | 0.22449   | 0.8743196 | 1.0487834 | 0.8090536 | 0.2174095 | 0.6434585 |
| Q9CXE7  | Tmed5    | 0.0462549 | 0.6726101 | 0.9470965 | 0.9060514 | -1.138322 | 1.601906  | 0.5040007 | 0.6828196 |
| Q99KF1  | Tmed9    | -0.192505 | 0.35766   | 0.6070971 | 0.8792876 | -0.281137 | 0.1622845 | 0.1339149 | 0.6209341 |
| Q3UBX0  | Tmem109  | 0.9447674 | 0.9372586 | 0.3470152 | 0.8743196 | 0.2071973 | 1.1066456 | 0.8576511 | 0.7556239 |
| Q3TA38  | Tmem120b | 0.6857904 | 0.8348785 | 0.4384812 | 0.8743196 | 0.1756677 | 0.9811622 | 0.8637988 | 0.7567341 |
| O70472  | Tmem131  | -0.282549 | 0.3938894 | 0.4785406 | 0.8743196 | -0.306032 | 0.405931  | 0.457433  | 0.6712964 |
| Q922P8  | Tmem132a | 0.1683179 | 1.0698358 | 0.8794263 | 0.9006736 | -0.120986 | 1.6362319 | 0.9434603 | 0.7691222 |
| Q8CEF9  | Tmem132c | -0.259943 | 0.4675127 | 0.5864017 | 0.8753373 | -0.025723 | 0.1838292 | 0.8908604 | 0.7593428 |
| Q9CYV5  | Tmem135  | 0.5278017 | 0.4950526 | 0.3217401 | 0.8743196 | -0.210317 | 0.4211884 | 0.6353175 | 0.7134626 |
| Q8VD26  | Tmem143  | -0.27589  | 0.7462353 | 0.722531  | 0.8910745 | 0.4713345 | 0.4767592 | 0.3610245 | 0.6594641 |
| Q9CQN6  | Tmem14c  | 0.6859086 | 0.5918823 | 0.2646303 | 0.8743196 | 0.3602238 | 0.6267893 | 0.5752969 | 0.7015295 |
| Q8C2L6  | Tmem161b | 0.4761899 | 1.0643976 | 0.6681168 | 0.8900083 | 0.8930873 | 1.2159407 | 0.4903518 | 0.6804142 |

|        |          |           |           |           |           |           |           |           |           |
|--------|----------|-----------|-----------|-----------|-----------|-----------|-----------|-----------|-----------|
| Q8C996 | Tmem163  | 0.1396767 | 0.2777108 | 0.6304298 | 0.8854638 | -0.586194 | 0.1265494 | 0.0035697 | 0.5840626 |
| Q8BG50 | Tmem169  | -0.544605 | 0.3197537 | 0.1323113 | 0.8743196 | -0.892646 | 0.3316915 | 0.0359954 | 0.6209341 |
| Q3TBT3 | Tmem173  | 1.1330669 | 0.6974246 | 0.1482664 | 0.8743196 | 0.6642499 | 0.9358775 | 0.5044873 | 0.6829049 |
| Q91W52 | Tmem19   | 0.6436552 | 0.2884886 | 0.0608694 | 0.8743196 | 0.7074718 | 0.3200635 | 0.0691042 | 0.6209341 |
| Q8CB65 | Tmem194b | -1.68002  | 1.3488152 | 0.2530015 | 0.8743196 | -0.305895 | 0.5681029 | 0.6096455 | 0.7082928 |
| Q5FWI3 | Tmem2    | 0.7174647 | 1.5522581 | 0.6579553 | 0.8900083 | 1.0471359 | 1.4678825 | 0.5024101 | 0.6823283 |
| Q91XE8 | Tmem205  | 0.0926528 | 0.3445706 | 0.7897931 | 0.8943678 | -0.343138 | 0.283264  | 0.2362493 | 0.6442378 |
| A7E1Z1 | Tmem215  | -0.21948  | 0.3552518 | 0.556254  | 0.8753373 | -0.313768 | 0.2216866 | 0.2067086 | 0.6429844 |
| Q5K6N0 | Tmem232  | -1.272839 | 1.1128115 | 0.2903072 | 0.8743196 | -1.455654 | 0.3587237 | 0.0066665 | 0.6209341 |
| B1AZA5 | Tmem245  | 0.0870158 | 0.3068538 | 0.7849405 | 0.8943678 | -0.526917 | 0.5778043 | 0.3969648 | 0.6617584 |
| Q9CR67 | Tmem33   | 0.4604119 | 1.3805113 | 0.7485181 | 0.8923639 | 0.9203866 | 1.1619209 | 0.4584522 | 0.6712964 |
| Q9DAV9 | Tmem38b  | 0.3397356 | 0.3697215 | 0.3887159 | 0.8743196 | -2.43907  | 1.4795381 | 0.1503388 | 0.6209341 |
| Q810L4 | Tmem39b  | -1.566507 | 0.9221136 | 0.1331566 | 0.8743196 | 0.7643514 | 0.6487033 | 0.283296  | 0.6508436 |
| Q9D8U2 | Tmem41a  | -0.818955 | 0.4338671 | 0.1010354 | 0.8743196 | 0.314745  | 0.5082069 | 0.5584704 | 0.6980496 |
| Q99LG1 | Tmem51   | 0.3168679 | 0.6388171 | 0.6270673 | 0.8837507 | 1.0744602 | 0.6181744 | 0.1058025 | 0.6209341 |
| Q3TWI9 | Tmem63b  | -0.229845 | 0.417974  | 0.5994847 | 0.8772764 | -0.408358 | 0.1950375 | 0.0811774 | 0.6209341 |
| Q9CR23 | Tmem9    | 0.3733975 | 0.6182849 | 0.564944  | 0.8753373 | -0.208461 | 0.8644459 | 0.8174687 | 0.7474231 |
| Q8C581 | Tmem91   | 0.538061  | 0.3110027 | 0.1272344 | 0.8743196 | -0.523808 | 0.2979726 | 0.1292691 | 0.6209341 |
| Q8VD00 | Tmem97   | 0.227135  | 1.7244628 | 0.8989168 | 0.9026707 | 2.5791879 | 0.9630265 | 0.0366234 | 0.6209341 |
| Q9JHJ0 | Tmod3    | -0.813033 | 0.4106136 | 0.0881759 | 0.8743196 | -1.200766 | 0.4973462 | 0.0522637 | 0.6209341 |
| Q8VCA5 | Tmprss4  | -0.615989 | 0.4180844 | 0.1542088 | 0.8743196 | -1.118468 | 0.578282  | 0.067374  | 0.6209341 |
| Q9DBI0 | Tmprss6  | -0.259765 | 0.2530099 | 0.338727  | 0.8743196 | -0.352832 | 0.1454083 | 0.0514071 | 0.6209341 |
| P69525 | Tmprss9  | -1.399214 | 1.2606665 | 0.3037092 | 0.8743196 | -0.139203 | 1.2071932 | 0.911961  | 0.7624298 |
| Q6ZWY8 | Tmsb10   | 0.7915485 | 1.4329455 | 0.5978667 | 0.8770074 | 1.0568678 | 1.0313233 | 0.3450004 | 0.6594641 |
| P20065 | Tmsb4x   | -0.748907 | 0.8563031 | 0.386249  | 0.8743196 | -0.221243 | 0.8292172 | 0.7909536 | 0.7439428 |
| Q3UV71 | Tmtc1    | 0.127951  | 0.6906363 | 0.8555028 | 0.8971541 | -0.350208 | 0.9448709 | 0.7168742 | 0.7303836 |
| Q56A06 | Tmtc2    | 1.4354614 | 0.7284965 | 0.0894327 | 0.8743196 | 0.5511738 | 1.336227  | 0.6943171 | 0.7259903 |
| Q8BRH0 | Tmtc3    | -0.804254 | 1.8272003 | 0.6730942 | 0.8900083 | 0.19189   | 0.6554417 | 0.7795631 | 0.7432569 |
| Q8BG19 | Tmtc4    | -2.622784 | 1.0705826 | 0.0441159 | 0.8743196 | -0.178079 | 0.2310634 | 0.4701372 | 0.6757189 |
| Q9D710 | Tmx2     | 0.6937241 | 0.7516727 | 0.3867611 | 0.8743196 | 0.3966765 | 0.9118102 | 0.6787437 | 0.7239064 |
| Q80YX1 | Tnc      | -0.090446 | 1.2102202 | 0.9425162 | 0.905186  | -0.306309 | 1.4646326 | 0.841261  | 0.7524932 |
| Q61333 | Tnfaip2  | 0.0127678 | 0.2508148 | 0.9608231 | 0.9067461 | -0.105408 | 0.1459202 | 0.4972461 | 0.6823283 |
| Q921Z5 | Tnfaip8  | 0.117624  | 1.1534803 | 0.9216376 | 0.9048359 | 0.227141  | 0.5405217 | 0.6889543 | 0.72435   |
| Q9JLL3 | Tnfrsf19 | -0.787474 | 1.7281404 | 0.6624209 | 0.8900083 | 1.4749976 | 1.0435586 | 0.2072504 | 0.6429844 |
| Q9WU72 | Tnfsf13b | -0.76295  | 0.8834425 | 0.4164088 | 0.8743196 | -0.121583 | 0.3773565 | 0.7582334 | 0.7380771 |
| P58871 | Tnks1bp1 | -1.290705 | 1.1198844 | 0.2869367 | 0.8743196 | -0.782391 | 0.694944  | 0.3032431 | 0.6540599 |
| Q3UES3 | Tnks2    | -0.928236 | 1.2993127 | 0.4981012 | 0.8748057 | -0.314841 | 0.3486619 | 0.4013239 | 0.6629633 |
| P19123 | Tnnc1    | 0.4245499 | 0.4780127 | 0.3778353 | 0.8743196 | 0.9196397 | 0.4877277 | 0.0646403 | 0.6209341 |
| P48787 | Tnni3    | 0.0077716 | 0.2790177 | 0.9778427 | 0.9072902 | 0.0312    | 0.2918033 | 0.9151332 | 0.7627031 |
| P50752 | Tnnt2    | -0.271763 | 0.3037495 | 0.3734183 | 0.8743196 | 0.1055165 | 0.2571696 | 0.682741  | 0.7239064 |
| Q8BFY9 | Tnpo1    | -1.345733 | 0.6658305 | 0.0829913 | 0.8743196 | -1.450282 | 0.3819735 | 0.0090013 | 0.6209341 |
| Q6P2B1 | Tnpo3    | -0.655073 | 0.5432262 | 0.2670319 | 0.8743196 | -1.103217 | 1.0433028 | 0.3310201 | 0.6594641 |
| Q3UHK8 | Tnrc6a   | 0.4279225 | 0.5141224 | 0.4326945 | 0.8743196 | -1.203448 | 1.0839334 | 0.30939   | 0.6570484 |
| Q5SSZ5 | Tns3     | -0.376677 | 1.0258864 | 0.7243392 | 0.8910745 | 0.4236783 | 1.2102583 | 0.7382455 | 0.7346307 |
| Q8BZ33 | Tns4     | -0.713175 | 1.3495636 | 0.6135219 | 0.8794961 | -1.098417 | 1.2278487 | 0.4054622 | 0.6646266 |
| Q9D2E2 | Toe1     | -1.379952 | 1.5553477 | 0.4044059 | 0.8743196 | 0.2866295 | 1.4450135 | 0.8493155 | 0.7537615 |
| Q9QZ06 | Tollip   | 0.6560198 | 0.3107016 | 0.0411972 | 0.8743196 | -0.005837 | 0.4606544 | 0.9899644 | 0.7779037 |
| O88746 | Tom1     | -1.516802 | 2.0059125 | 0.4742236 | 0.8743196 | 0.2792562 | 0.9119177 | 0.7697777 | 0.7410618 |
| Q5SRX1 | Tom1l2   | 1.3665617 | 0.726636  | 0.1020655 | 0.8743196 | 1.1145495 | 0.6776439 | 0.1511261 | 0.6209341 |
| Q9CYG7 | Tomm34   | 0.6172481 | 1.041586  | 0.5720843 | 0.8753373 | 0.0059654 | 1.5032514 | 0.9969624 | 0.7796648 |
| Q9QYA2 | Tomm40   | 0.8540421 | 0.9586145 | 0.4025577 | 0.8743196 | -1.744577 | 1.414507  | 0.2635693 | 0.6500471 |
| Q9CZW5 | Tomm70a  | 0.1666546 | 0.4175229 | 0.6934642 | 0.8900083 | -0.302832 | 0.4031008 | 0.4612478 | 0.6725136 |
| Q8R4U6 | Top1mt   | -0.58343  | 0.9002216 | 0.5375928 | 0.8753373 | -1.036756 | 0.9950845 | 0.3376181 | 0.6594641 |
| Q64511 | Top2b    | 0.5432298 | 0.882762  | 0.5577755 | 0.8753373 | -1.555864 | 1.6276968 | 0.3760493 | 0.6594641 |
| Q9Z321 | Top3b    | -0.767944 | 0.7674093 | 0.3503023 | 0.8743196 | 0.0932247 | 0.7212208 | 0.9013765 | 0.7610813 |
| Q8BWC0 | Tpcn2    | 1.3606273 | 0.8647842 | 0.1364845 | 0.8743196 | 1.3247488 | 0.8570872 | 0.1461805 | 0.6209341 |
| Q62393 | Tpd52    | 0.8684592 | 0.6286552 | 0.2096223 | 0.8743196 | 1.3563091 | 0.6959982 | 0.0992342 | 0.6209341 |
| Q9CYZ2 | Tpd52l2  | 0.5809212 | 0.4010102 | 0.1554299 | 0.8743196 | 0.0175179 | 0.4368436 | 0.968247  | 0.7750874 |
| Q99MS8 | Tpgs1    | 0.6086201 | 0.7013322 | 0.4142583 | 0.8743196 | -0.29532  | 0.7871621 | 0.7204378 | 0.7303836 |
| P17751 | Tpi1     | -0.389602 | 0.1737279 | 0.0259433 | 0.8743196 | -0.054942 | 0.1598796 | 0.7314968 | 0.7326734 |
| Q9R0M5 | Tpk1     | 0.0358806 | 0.9623118 | 0.9712982 | 0.9072902 | 1.2191482 | 0.8724102 | 0.2117688 | 0.6429844 |

|        |          |           |           |           |           |           |           |           |           |
|--------|----------|-----------|-----------|-----------|-----------|-----------|-----------|-----------|-----------|
| P58771 | Tpm1     | -0.297976 | 0.2431069 | 0.2220368 | 0.8743196 | -0.167874 | 0.1730677 | 0.3336544 | 0.6594641 |
| P58774 | Tpm2     | 0.5143452 | 0.6786519 | 0.4602574 | 0.8743196 | -0.113953 | 0.9572171 | 0.907059  | 0.7612577 |
| Q91VH3 | Tpm2     | -0.477838 | 0.585046  | 0.4409764 | 0.8743196 | -0.890543 | 0.6510753 | 0.2203886 | 0.6434585 |
| P21107 | Tpm3     | -1.207459 | 0.4700591 | 0.0152438 | 0.8743196 | -0.691131 | 0.2596392 | 0.0129282 | 0.6209341 |
| Q6IRU2 | Tpm4     | 0.3712728 | 0.3960447 | 0.3533188 | 0.8743196 | -0.10636  | 0.3952568 | 0.7892085 | 0.7439428 |
| O55060 | Tpmt     | -0.043439 | 0.4404889 | 0.9219488 | 0.9048359 | 0.306124  | 0.3995051 | 0.4488103 | 0.6701719 |
| O89023 | Tpp1     | -0.722061 | 0.7245426 | 0.3521652 | 0.8743196 | -0.532323 | 0.312067  | 0.1389235 | 0.6209341 |
| Q64514 | Tpp2     | -0.13355  | 0.2412708 | 0.581323  | 0.8753373 | -0.335697 | 0.3200449 | 0.297545  | 0.6540599 |
| Q8CB49 | Tprg1    | -0.682868 | 2.0403436 | 0.7476693 | 0.8923639 | 1.8790015 | 1.1314298 | 0.1478339 | 0.6209341 |
| Q8QZZ7 | Tprkb    | 0.5480118 | 0.6752363 | 0.4437468 | 0.8743196 | 0.5196407 | 0.6892316 | 0.4794162 | 0.6789818 |
| Q9QUL7 | Tpsg1    | 0.5229602 | 0.4433923 | 0.2565872 | 0.8743196 | 0.0921786 | 0.4065249 | 0.8241464 | 0.7492441 |
| O70281 | Tpst1    | 1.5226055 | 0.9976026 | 0.170778  | 0.8743196 | 1.8785891 | 0.9654344 | 0.0996307 | 0.6209341 |
| P63028 | Tpt1     | -0.998106 | 0.5704382 | 0.0900615 | 0.8743196 | -0.056371 | 0.4099918 | 0.8916621 | 0.7595603 |
| Q3U0V2 | Tradd    | -0.722842 | 0.5574313 | 0.2358275 | 0.8743196 | -0.317031 | 0.3574557 | 0.4092674 | 0.666531  |
| Q61382 | Traf4    | -1.219224 | 0.6199162 | 0.0899199 | 0.8743196 | 0.3137541 | 0.5286251 | 0.5745047 | 0.7015295 |
| Q3UDK1 | Traf1    | -2.22829  | 1.427527  | 0.162505  | 0.8743196 | -0.455718 | 0.3072513 | 0.1885424 | 0.6405321 |
| Q8VIG6 | Traip    | -0.0441   | 1.0938164 | 0.968966  | 0.9072902 | -1.07628  | 1.4188891 | 0.4768586 | 0.6786617 |
| Q6PD31 | Trak1    | 0.6229255 | 1.2853935 | 0.642743  | 0.8891711 | 0.3543738 | 1.2548565 | 0.7871241 | 0.7439428 |
| Q9CQN1 | Trap1    | -0.401628 | 0.3182677 | 0.2089234 | 0.8743196 | 0.2068564 | 0.2803837 | 0.4619686 | 0.6725223 |
| Q3TLI0 | Trappc10 | 0.000236  | 0.7131227 | 0.9997452 | 0.9118594 | -0.46382  | 0.6454845 | 0.499425  | 0.6823283 |
| O55013 | Trappc3  | -1.35364  | 0.929789  | 0.1887695 | 0.8743196 | -0.495698 | 0.873319  | 0.5908948 | 0.7051736 |
| Q78XR0 | Trappc6a | -0.326392 | 0.9638207 | 0.7448093 | 0.8923639 | 0.4356356 | 1.1522785 | 0.7183968 | 0.7303836 |
| E9Q9K5 | Trdn     | -1.426725 | 1.1623048 | 0.2593097 | 0.8743196 | -1.649242 | 0.9991459 | 0.1499011 | 0.6209341 |
| Q8BXJ2 | Trerf1   | 0.1886165 | 1.1079841 | 0.8696419 | 0.898064  | 0.2041581 | 1.474584  | 0.8944136 | 0.7597828 |
| D3YYR8 | Trf      | 0.1776629 | 0.2333732 | 0.4713517 | 0.8743196 | 0.9407242 | 0.2798452 | 0.0151997 | 0.6209341 |
| Q8K093 | Trhde    | -0.766031 | 0.9697176 | 0.4554777 | 0.8743196 | -1.09319  | 1.2156445 | 0.4031553 | 0.6638484 |
| Q9D8Z2 | Triap1   | 0.7451977 | 0.9616766 | 0.4637687 | 0.8743196 | 0.6742001 | 1.0665017 | 0.5505953 | 0.6980496 |
| Q99PQ2 | Trim11   | 0.0730969 | 0.9015656 | 0.9376496 | 0.9048359 | -0.062799 | 0.5991754 | 0.9199438 | 0.7627031 |
| Q99PP9 | Trim16   | -2.581451 | 4.5804818 | 0.5906312 | 0.8753373 | 3.2987999 | 5.2242971 | 0.551039  | 0.6980496 |
| Q62318 | Trim28   | -0.195979 | 0.8972904 | 0.8333393 | 0.8943678 | 0.8176927 | 0.6671377 | 0.2662445 | 0.6500471 |
| Q8R2Q0 | Trim29   | -0.20742  | 0.2475222 | 0.4297193 | 0.8743196 | -0.116304 | 0.1560152 | 0.484158  | 0.6796099 |
| Q80WG7 | Trim36   | 1.0462739 | 0.5021257 | 0.0756718 | 0.8743196 | -1.037474 | 1.2705567 | 0.4453868 | 0.6699704 |
| Q9D2H5 | Trim42   | -0.003976 | 0.6283657 | 0.9951274 | 0.9101811 | 0.1407013 | 0.6611063 | 0.8385086 | 0.7519044 |
| Q7TNM2 | Trim46   | 1.3313777 | 1.0170325 | 0.23184   | 0.8743196 | 0.0080725 | 1.600398  | 0.996139  | 0.7793849 |
| Q9ERP3 | Trim54   | 0.3824729 | 0.3373578 | 0.2747028 | 0.8743196 | -0.572325 | 0.5394492 | 0.3080294 | 0.6563813 |
| G3X8Y1 | Trim55   | -0.128231 | 0.5313887 | 0.8162289 | 0.8943678 | -0.63032  | 0.748903  | 0.4322394 | 0.6694352 |
| Q8BGE7 | Trim6    | -0.411992 | 0.3686432 | 0.3006254 | 0.8743196 | -0.632436 | 0.3135877 | 0.0903029 | 0.6209341 |
| Q8VI40 | Trim60   | 0.0236299 | 0.2264033 | 0.9198026 | 0.9048359 | -0.537569 | 0.2994178 | 0.1227348 | 0.6209341 |
| Q80V85 | Trim62   | -0.713298 | 1.233458  | 0.5811869 | 0.8753373 | 0.538432  | 0.8853559 | 0.5653804 | 0.6997388 |
| Q80X56 | Trim69   | 0.3704555 | 0.5059599 | 0.487841  | 0.8743196 | -0.354541 | 0.3503449 | 0.3506047 | 0.6594641 |
| Q1XH17 | Trim72   | -0.263513 | 0.3491913 | 0.4520638 | 0.8743196 | -0.028905 | 0.2850065 | 0.9194283 | 0.7627031 |
| Q99KW3 | Triobp   | -0.620824 | 0.7089867 | 0.4102591 | 0.8743196 | -1.393975 | 1.4713042 | 0.3799929 | 0.6602564 |
| Q8CJ53 | Trip10   | 0.5495843 | 0.6853874 | 0.4351542 | 0.8743196 | 0.4450059 | 0.7482834 | 0.5622508 | 0.6997388 |
| G5E870 | Trip12   | 0.1038687 | 0.6988411 | 0.8860368 | 0.9006736 | -0.260226 | 0.6108453 | 0.6849599 | 0.724036  |
| Q9QXN3 | Trip4    | 1.5352737 | 0.8435709 | 0.1115734 | 0.8743196 | 0.6724079 | 1.2754091 | 0.6169642 | 0.7091807 |
| Q9Z1Y4 | Trip6    | 0.1597835 | 0.3500068 | 0.6618468 | 0.8900083 | -1.639114 | 0.7732586 | 0.0783106 | 0.6209341 |
| Q80UN9 | Trit1    | -2.279421 | 3.0840767 | 0.4838911 | 0.8743196 | -1.372134 | 0.9594813 | 0.2026376 | 0.6429844 |
| Q9DCG9 | Trmt112  | -0.380761 | 0.5996071 | 0.5456054 | 0.8753373 | -0.72057  | 0.9532909 | 0.4783386 | 0.6788349 |
| Q8BNV1 | Trmt2a   | -0.186952 | 0.7420469 | 0.8083234 | 0.8943678 | 0.5251926 | 0.2438433 | 0.0747121 | 0.6209341 |
| Q8BQJ6 | Trmt2b   | 1.5635169 | 4.516627  | 0.7393872 | 0.8923639 | 3.0134669 | 4.9694642 | 0.5664716 | 0.6997388 |
| Q9D2Q2 | Trmt44   | 0.8488166 | 0.3672392 | 0.0540795 | 0.8743196 | 0.1930413 | 0.5072034 | 0.7166109 | 0.7303836 |
| Q9D0C4 | Trmt5    | -0.843646 | 0.6754438 | 0.2518035 | 0.8743196 | 0.4997174 | 0.5177375 | 0.3717219 | 0.6594641 |
| Q9DAT5 | Trmu     | 0.5823019 | 0.8465209 | 0.5020299 | 0.8753373 | 0.9207138 | 0.9451964 | 0.3477859 | 0.6594641 |
| Q80Z11 | Trnp1    | -0.096004 | 0.8149722 | 0.9095347 | 0.9048359 | 0.2743081 | 0.5956422 | 0.6613582 | 0.7213939 |
| Q8K1J6 | Trnt1    | 0.5179851 | 0.5519941 | 0.3792854 | 0.8743196 | -3.818851 | 2.2310344 | 0.1377962 | 0.6209341 |
| O08848 | Trove2   | 0.5455022 | 1.1513209 | 0.6500602 | 0.8900083 | -0.553249 | 1.4809822 | 0.7215688 | 0.7303836 |
| A2AU89 | Trp53bp1 | -0.365246 | 1.0566346 | 0.7397467 | 0.8923639 | 0.9070999 | 0.9458108 | 0.3745587 | 0.6594641 |
| Q9D976 | Trp53tg5 | 0.800089  | 0.8092952 | 0.3557803 | 0.8743196 | -0.023013 | 1.2982766 | 0.9864325 | 0.7775007 |
| Q8BLA8 | Trpa1    | -1.35249  | 1.1076739 | 0.2616054 | 0.8743196 | -0.053779 | 0.9038401 | 0.9544854 | 0.7716385 |
| Q9QUQ5 | Trpc4    | -0.070749 | 0.2105091 | 0.7466547 | 0.8923639 | -0.146514 | 0.1231086 | 0.2789488 | 0.6503929 |
| Q9JLV2 | Trpc4ap  | -0.190344 | 0.3530849 | 0.5977365 | 0.8770074 | -0.58622  | 0.3100944 | 0.0811953 | 0.6209341 |

|        |            |           |           |           |           |           |           |           |           |
|--------|------------|-----------|-----------|-----------|-----------|-----------|-----------|-----------|-----------|
| Q91YD4 | Trpm2      | 1.7489557 | 2.2976383 | 0.45834   | 0.8743196 | 1.5464117 | 2.5506303 | 0.5547646 | 0.6980496 |
| Q91WG3 | Trub2      | 0.769384  | 0.9212269 | 0.4311986 | 0.8743196 | -1.429673 | 1.7408845 | 0.4429127 | 0.6699704 |
| Q9EP53 | Tsc1       | 1.3247601 | 0.8891648 | 0.1798676 | 0.8743196 | 0.3255754 | 1.0606741 | 0.7692545 | 0.7407476 |
| P62500 | Tsc22d1    | -0.944244 | 1.1511805 | 0.4391134 | 0.8743196 | -1.931732 | 1.2432987 | 0.1712454 | 0.6323131 |
| Q9Z2S7 | Tsc22d3    | 0.1866256 | 0.6861914 | 0.7934899 | 0.8943678 | 0.3674435 | 0.4579986 | 0.452987  | 0.6712964 |
| Q9CWG3 | Tsen34     | -0.153566 | 0.7993463 | 0.8531064 | 0.8962775 | 1.8172523 | 0.4452603 | 0.0064924 | 0.6209341 |
| Q9CZR8 | Tsfm       | 0.2265056 | 0.3882325 | 0.5638264 | 0.8753373 | -0.114711 | 0.3423105 | 0.7401334 | 0.7346307 |
| Q8C1H4 | Tsga10ip   | -2.382842 | 1.1577218 | 0.0785717 | 0.8743196 | -1.10145  | 1.0054082 | 0.3153012 | 0.6594641 |
| P47750 | Tshr       | 0.7507198 | 0.9364988 | 0.4491221 | 0.8743196 | 1.4018554 | 0.9387378 | 0.1859601 | 0.6405321 |
| Q68FE9 | Tshz2      | -0.523178 | 0.4049332 | 0.2159057 | 0.8743196 | -0.016379 | 0.5209649 | 0.9753963 | 0.776185  |
| O54887 | Tsks       | -0.782139 | 0.9241938 | 0.425371  | 0.8743196 | 0.7110524 | 1.1433017 | 0.5568669 | 0.6980496 |
| Q62348 | Tsn        | 0.0747101 | 0.7529559 | 0.9222756 | 0.9048359 | 0.5079376 | 0.4658711 | 0.2953799 | 0.6540599 |
| Q9D1D1 | Tspan11    | -0.540405 | 0.2465355 | 0.0644882 | 0.8743196 | -1.084327 | 0.4263542 | 0.0438879 | 0.6209341 |
| Q3U364 | Tspan3     | -1.114777 | 0.8226031 | 0.2174611 | 0.8743196 | -1.059388 | 1.3928672 | 0.4757243 | 0.677606  |
| Q9CQ88 | Tspan31    | -0.09943  | 0.6656527 | 0.8825626 | 0.9006736 | 0.3095867 | 0.4926504 | 0.5368461 | 0.695758  |
| Q8BJU2 | Tspan9     | 0.8124118 | 1.03406   | 0.4578347 | 0.8743196 | 1.4333404 | 0.6437978 | 0.0676015 | 0.6209341 |
| Q9CRZ8 | Tspo2      | 0.2893124 | 1.3423844 | 0.835506  | 0.8943678 | -0.349658 | 1.0654971 | 0.7539372 | 0.7379888 |
| P52196 | Tst        | 0.4039449 | 0.3093537 | 0.1941493 | 0.8743196 | -0.158408 | 0.3862856 | 0.6825907 | 0.7239064 |
| P23591 | Tsta3      | -0.520981 | 0.3166414 | 0.1134998 | 0.8743196 | -0.419387 | 0.4546628 | 0.367308  | 0.6594641 |
| Q9D0B5 | Tstd3      | 0.0339551 | 0.3706678 | 0.9282239 | 0.9048359 | -0.995958 | 0.5490191 | 0.092805  | 0.6209341 |
| Q3UVR3 | Ttbk2      | 0.6523937 | 1.1796171 | 0.5974365 | 0.8770074 | 1.4712743 | 0.9790801 | 0.1836012 | 0.6405321 |
| Q91Z38 | Ttc1       | 0.2132595 | 1.9047853 | 0.9139981 | 0.9048359 | 1.6568868 | 0.9425402 | 0.1292711 | 0.6209341 |
| D3Z098 | Ttc14      | -0.752546 | 1.1246741 | 0.5248632 | 0.8753373 | -1.265351 | 0.540195  | 0.0576547 | 0.6209341 |
| Q8CC21 | Ttc19      | -0.442554 | 0.8549439 | 0.6206607 | 0.8826986 | -1.032895 | 0.7671431 | 0.2268027 | 0.6442378 |
| Q8BS45 | Ttc26      | 1.5560488 | 1.2498954 | 0.2532122 | 0.8743196 | 0.3736151 | 2.1751445 | 0.8692686 | 0.7571111 |
| Q8CD92 | Ttc27      | -0.88156  | 0.9084844 | 0.3641919 | 0.8743196 | 0.8793983 | 0.7982759 | 0.312844  | 0.6594641 |
| Q80VM3 | Ttc29      | 0.6876413 | 0.884016  | 0.4621272 | 0.8743196 | 0.5510936 | 0.8854363 | 0.5565785 | 0.6980496 |
| Q8VBW8 | Ttc36      | -0.053755 | 0.7273585 | 0.9413548 | 0.9048359 | 0.483242  | 0.6866538 | 0.4849801 | 0.6796099 |
| A3KMP2 | Ttc38      | 0.1303434 | 0.2078844 | 0.5316065 | 0.8753373 | -0.056894 | 0.2183553 | 0.7948386 | 0.7439428 |
| Q8VE09 | Ttc39c     | 0.0931864 | 0.2719915 | 0.7328036 | 0.8923639 | -0.172208 | 0.3131209 | 0.5841128 | 0.7048643 |
| Q8BGB2 | Ttc7a      | 0.5196317 | 0.4768547 | 0.2930397 | 0.8743196 | 0.1505902 | 0.4908377 | 0.7638528 | 0.7393825 |
| E9Q6P5 | Ttc7b      | 1.1032989 | 1.5448345 | 0.4982289 | 0.8748057 | 1.4199208 | 1.492394  | 0.3781185 | 0.6594641 |
| Q62187 | Ttf1       | -1.485346 | 1.0295065 | 0.1696404 | 0.8743196 | -0.438636 | 0.7053597 | 0.5447848 | 0.6979269 |
| A4Q9E8 | TtlI6      | 1.8281123 | 1.276529  | 0.1952175 | 0.8743196 | 0.0751953 | 1.4694294 | 0.9608487 | 0.7730074 |
| A2APC3 | TtlI9      | 1.1457498 | 0.9345226 | 0.259829  | 0.8743196 | 0.410492  | 1.1649053 | 0.7365991 | 0.7345743 |
| A2ASS6 | Ttn        | -0.165477 | 0.3213401 | 0.6083841 | 0.8792876 | -0.29307  | 0.3077072 | 0.3450453 | 0.6594641 |
| Q8R112 | Ttn        | -0.154661 | 0.7475488 | 0.841985  | 0.8955988 | 0.6442737 | 0.273771  | 0.0567993 | 0.6209341 |
| Q8BWP5 | Ttpa       | 0.0228204 | 0.4019612 | 0.954906  | 0.9060514 | 0.5975881 | 0.3027596 | 0.0534357 | 0.6209341 |
| P68373 | Tuba1c     | 1.4054467 | 0.7272256 | 0.0945577 | 0.8743196 | -0.359925 | 1.3432984 | 0.7977179 | 0.7439428 |
| P68368 | Tuba4a     | 0.0129598 | 0.2884802 | 0.9645554 | 0.9067461 | -0.237894 | 0.258549  | 0.3684787 | 0.6594641 |
| Q9JJZ2 | Tuba8      | 0.6095562 | 0.5090847 | 0.2497474 | 0.8743196 | 0.2492803 | 0.6672332 | 0.7147216 | 0.7303836 |
| Q7TMM9 | Tubb2a     | -0.066447 | 0.1757025 | 0.7165053 | 0.8910745 | -0.153381 | 0.1064655 | 0.1997537 | 0.6429844 |
| P68372 | Tubb4b     | 0.6911627 | 0.5647693 | 0.2606187 | 0.8743196 | 0.6956394 | 0.3818552 | 0.1183353 | 0.6209341 |
| J3QNR5 | Tubb4b-ps1 | 1.0327014 | 0.5697599 | 0.1127977 | 0.8743196 | -0.460402 | 0.6399206 | 0.4989055 | 0.6823283 |
| P99024 | Tubb5      | -0.760995 | 0.6274718 | 0.2375183 | 0.8743196 | -0.157386 | 0.7431138 | 0.8344125 | 0.7519044 |
| Q9R1K7 | Tubd1      | -3.360365 | 0.717363  | 0.0022494 | 0.8743196 | -2.010797 | 0.8611349 | 0.0582365 | 0.6209341 |
| Q8VCK3 | Tubg2      | -0.234781 | 1.0387634 | 0.8276441 | 0.8943678 | 0.4699748 | 0.8953016 | 0.6184513 | 0.7091807 |
| Q8BKN5 | Tubgcp5    | -0.761438 | 0.4715306 | 0.1503834 | 0.8743196 | -0.990165 | 0.6223325 | 0.1627018 | 0.6273856 |
| Q8BFR5 | Tufm       | 0.1438155 | 0.1745702 | 0.4109514 | 0.8743196 | 0.0970558 | 0.1845123 | 0.5994995 | 0.7061107 |
| Q3TNP2 | Tug1       | -0.407891 | 1.3236644 | 0.7669336 | 0.8923639 | 0.5079401 | 1.4656538 | 0.7407508 | 0.7346307 |
| P46686 | Tulp2      | 0.7229213 | 0.5769489 | 0.2504353 | 0.8743196 | 0.6092514 | 0.6548106 | 0.3880549 | 0.6611124 |
| Q91YR1 | Twf1       | -0.153489 | 0.3940757 | 0.7004968 | 0.8901989 | 0.524188  | 0.374219  | 0.1766132 | 0.6355136 |
| Q9Z0P5 | Twf2       | -0.35415  | 1.1139625 | 0.7534147 | 0.8923639 | -0.734613 | 1.2298376 | 0.5569932 | 0.6980496 |
| Q6PAM1 | Txlna      | -0.734082 | 0.851913  | 0.417398  | 0.8743196 | -0.094719 | 0.6891204 | 0.8951725 | 0.7601149 |
| Q8VBT1 | Txlnb      | -0.4731   | 0.4493095 | 0.2952801 | 0.8743196 | -0.439223 | 0.4999797 | 0.3824517 | 0.6606339 |
| P10639 | Txn        | -0.082732 | 0.3404513 | 0.8087901 | 0.8943678 | -0.053066 | 0.331974  | 0.8735838 | 0.7576535 |
| P97493 | Txn2       | 0.1253749 | 0.2404032 | 0.6057113 | 0.8792876 | -0.088605 | 0.3332315 | 0.7923387 | 0.7439428 |
| Q7TN22 | Txndc16    | -0.283561 | 0.9584767 | 0.7759315 | 0.8940257 | 0.4113048 | 0.2325465 | 0.1273531 | 0.6209341 |
| Q9CQM5 | Txndc17    | 0.1645179 | 0.5282304 | 0.7582633 | 0.8923639 | -0.112589 | 0.5613059 | 0.8430498 | 0.7526801 |
| Q91W90 | Txndc5     | 0.199003  | 0.3527584 | 0.5753453 | 0.8753373 | 0.033746  | 0.4080934 | 0.934499  | 0.7669305 |
| Q8BG60 | Txnip      | 0.0239512 | 1.3567416 | 0.9864079 | 0.9080307 | 0.4693586 | 1.4525023 | 0.7575558 | 0.7380771 |

|        |         |           |           |           |           |           |           |           |           |
|--------|---------|-----------|-----------|-----------|-----------|-----------|-----------|-----------|-----------|
| Q8CDN6 | Txn1l   | 0.2444682 | 0.2637558 | 0.3568154 | 0.8743196 | -0.319052 | 0.3192141 | 0.3210487 | 0.6594641 |
| Q9JMH6 | Txnrd1  | 0.8734556 | 0.705325  | 0.2208375 | 0.8743196 | -0.70342  | 0.9338886 | 0.4549985 | 0.6712964 |
| Q9JLT4 | Txnrd2  | -0.405741 | 0.7414478 | 0.586436  | 0.8753373 | -1.030501 | 0.8273569 | 0.2189813 | 0.6434585 |
| Q99N42 | Tymp    | 1.8170356 | 0.4912653 | 0.0076683 | 0.8743196 | 0.9467477 | 0.7095333 | 0.2305036 | 0.6442378 |
| Q6NV83 | U2surp  | 0.3596056 | 0.9431093 | 0.7083288 | 0.8910745 | 0.3314817 | 1.0436317 | 0.7558147 | 0.7380125 |
| Q8CGB3 | Uaca    | 1.232385  | 1.2718078 | 0.3648247 | 0.8743196 | 1.2076866 | 1.187793  | 0.3485056 | 0.6594641 |
| Q91YN5 | Uap1    | 1.3250295 | 1.0157192 | 0.2333054 | 0.8743196 | 1.3011751 | 1.1371042 | 0.296092  | 0.6540599 |
| Q3TW96 | Uap11l  | 1.0288607 | 0.6302497 | 0.1466006 | 0.8743196 | 1.1495426 | 0.6646243 | 0.1344269 | 0.6209341 |
| Q02053 | Uba1    | 0.0481191 | 0.2531984 | 0.849453  | 0.8962775 | 0.1766111 | 0.2549363 | 0.4893115 | 0.6803412 |
| Q9Z1F9 | Uba2    | 1.122279  | 0.9088445 | 0.2567276 | 0.8743196 | -0.721534 | 0.6706682 | 0.3233428 | 0.6594641 |
| Q8C878 | Uba3    | -2.105417 | 1.2217372 | 0.1284984 | 0.8743196 | 0.3126608 | 0.6468578 | 0.6459771 | 0.7175625 |
| F6VRI6 | Uba5    | 0.549591  | 0.6024673 | 0.3919788 | 0.8743196 | -0.47153  | 0.5483022 | 0.4228248 | 0.6694352 |
| Q8VE47 | Uba5    | 0.2533339 | 0.5322239 | 0.6485778 | 0.8900083 | 0.3094025 | 0.6602499 | 0.6558866 | 0.7198872 |
| Q8VDI7 | Ubac1   | -0.522056 | 0.5246669 | 0.3355058 | 0.8743196 | -0.111338 | 0.6164722 | 0.8594631 | 0.7558572 |
| Q80X50 | Ubp2l   | 1.1194943 | 0.7241897 | 0.1429732 | 0.8743196 | 0.9762308 | 0.7684255 | 0.2261979 | 0.6442378 |
| P61087 | Ube2k   | -1.23602  | 1.6072131 | 0.4538061 | 0.8743196 | -1.932594 | 1.7486753 | 0.289118  | 0.652142  |
| P68037 | Ube2l3  | 0.131522  | 0.3928102 | 0.7386457 | 0.8923639 | 0.100443  | 0.3855734 | 0.7952518 | 0.7439428 |
| Q3U7T7 | Ube2l3  | 0.4659547 | 0.5134074 | 0.3942737 | 0.8743196 | -0.342236 | 0.4315196 | 0.4579284 | 0.6712964 |
| P61082 | Ube2m   | -0.774012 | 0.4090156 | 0.064609  | 0.8743196 | -0.915231 | 0.3524673 | 0.0130112 | 0.6209341 |
| P61089 | Ube2n   | 0.2057682 | 0.2519189 | 0.417119  | 0.8743196 | 0.3774841 | 0.2619649 | 0.1552619 | 0.6211692 |
| Q6ZPJ3 | Ube2o   | 0.2396454 | 0.5714309 | 0.6875105 | 0.8900083 | -0.366518 | 0.6253141 | 0.5791514 | 0.7021424 |
| Q9CZY3 | Ube2v1  | 0.1506478 | 0.5925969 | 0.8015874 | 0.8943678 | 0.1092418 | 0.6219662 | 0.8623434 | 0.7561118 |
| Q9D2M8 | Ube2v2  | -0.488939 | 0.6508909 | 0.4770312 | 0.8743196 | -1.018575 | 0.6165872 | 0.149632  | 0.6209341 |
| O08759 | Ube3a   | 2.5523807 | 1.2206117 | 0.074852  | 0.8743196 | 1.3221158 | 1.4038767 | 0.3826697 | 0.6606339 |
| Q9CQ84 | Ubl4b   | -1.082873 | 0.5588636 | 0.0938615 | 0.8743196 | -1.080569 | 0.6541271 | 0.1496385 | 0.6209341 |
| Q4G0F8 | Ubn1    | 1.1149721 | 0.6402369 | 0.125135  | 0.8743196 | 1.1497896 | 0.5338084 | 0.0746993 | 0.6209341 |
| Q80WC1 | Ubn2    | -0.480902 | 0.4359311 | 0.306432  | 0.8743196 | -0.388189 | 0.2318727 | 0.1451251 | 0.6209341 |
| Q9QZM0 | Ubqln2  | -0.376346 | 1.141913  | 0.7513637 | 0.8923639 | 0.4594733 | 0.3672285 | 0.2574381 | 0.6500471 |
| Q6WKZ8 | Ubr2    | -0.238309 | 0.7980338 | 0.7738999 | 0.8935551 | -1.982546 | 1.2027441 | 0.1503767 | 0.6209341 |
| Q5U430 | Ubr3    | -0.340253 | 1.0923987 | 0.7645125 | 0.8923639 | -0.651955 | 1.4306896 | 0.6646379 | 0.7215904 |
| A2AN08 | Ubr4    | 0.5950608 | 0.4335073 | 0.1776987 | 0.8743196 | 0.2745427 | 0.4833773 | 0.5737889 | 0.7015295 |
| Q922Y1 | Ubxn1   | 0.2464071 | 0.6879508 | 0.7252026 | 0.8910745 | 0.4044428 | 0.7045798 | 0.575752  | 0.7015295 |
| Q8VCH8 | Ubxn4   | 0.1891352 | 0.662512  | 0.7835376 | 0.8942061 | -0.320536 | 0.8579014 | 0.7215273 | 0.7303836 |
| Q9R0P9 | Uchl1   | 0.8079324 | 0.5886683 | 0.1797649 | 0.8743196 | 1.5360778 | 0.6102899 | 0.0180802 | 0.6209341 |
| Q9JKB1 | Uchl3   | 1.173243  | 0.4454645 | 0.0187913 | 0.8743196 | 0.1664149 | 0.548812  | 0.7665145 | 0.7399809 |
| Q9WUP7 | Uchl5   | 0.3853951 | 0.6564092 | 0.5628386 | 0.8753373 | 0.5202304 | 0.6709892 | 0.4472223 | 0.6699751 |
| Q91YL3 | Uckl1   | -0.60559  | 1.0677791 | 0.5883303 | 0.8753373 | 1.1052178 | 0.7650832 | 0.1986991 | 0.6429844 |
| Q924A4 | Ucn3    | 0.0095093 | 0.6775295 | 0.9891936 | 0.9092148 | 0.3269301 | 0.6903115 | 0.6525272 | 0.7194773 |
| P70406 | Ucp2    | -1.206095 | 0.7480176 | 0.1509124 | 0.8743196 | -0.551626 | 0.4865514 | 0.3001589 | 0.6540599 |
| P70362 | Ufd1l   | -0.463524 | 0.4681192 | 0.3377893 | 0.8743196 | -0.830591 | 0.3574463 | 0.0369953 | 0.6209341 |
| P61961 | Ufm1    | -0.379306 | 0.5927791 | 0.528575  | 0.8753373 | -0.906172 | 0.6033128 | 0.1487234 | 0.6209341 |
| O70475 | Ugdh    | -0.108656 | 0.1727604 | 0.5300112 | 0.8753373 | -0.138631 | 0.1617493 | 0.3924195 | 0.6617406 |
| Q6P5E4 | Uggt1   | -1.547586 | 1.1812083 | 0.2314902 | 0.8743196 | -0.804204 | 0.4889778 | 0.1511424 | 0.6209341 |
| Q91ZJ5 | Ugp2    | 0.0082547 | 0.184937  | 0.9644379 | 0.9067461 | -0.127718 | 0.1893249 | 0.5007298 | 0.6823283 |
| Q63886 | Ugt1a1  | 0.6494549 | 0.4529662 | 0.1616448 | 0.8743196 | 0.6430004 | 0.5476365 | 0.2505928 | 0.6500471 |
| Q64435 | Ugt1a6  | -0.608549 | 0.6494057 | 0.3635585 | 0.8743196 | -0.570845 | 0.4912875 | 0.2661501 | 0.6500471 |
| Q6ZQM8 | Ugt1a7c | 0.3443042 | 0.5286276 | 0.5356306 | 0.8753373 | -0.419319 | 0.9983117 | 0.6890912 | 0.72435   |
| Q8BWQ1 | Ugt2a3  | -1.573224 | 0.8835506 | 0.0827739 | 0.8743196 | -0.168987 | 0.3852701 | 0.6637122 | 0.7215904 |
| Q8R084 | Ugt2b1  | -0.176376 | 0.2292789 | 0.443821  | 0.8743196 | -0.022429 | 0.1914325 | 0.9070394 | 0.7612577 |
| P17717 | Ugt2b17 | -0.409985 | 0.2605007 | 0.1212612 | 0.8743196 | -0.695215 | 0.3010225 | 0.0252623 | 0.6209341 |
| Q8K154 | Ugt2b34 | 2.6071435 | 1.4623191 | 0.0948501 | 0.8743196 | 2.3070525 | 1.7117152 | 0.2007413 | 0.6429844 |
| Q3UP75 | Ugt3a1  | -1.25325  | 1.1417778 | 0.3086817 | 0.8743196 | 0.3101565 | 0.4075327 | 0.4754589 | 0.6774845 |
| Q8JZZ0 | Ugt3a2  | 0.1837782 | 0.4139194 | 0.6633843 | 0.8900083 | -0.785498 | 0.6004947 | 0.2135026 | 0.6429844 |
| O70405 | Ulk1    | -1.60218  | 0.9628001 | 0.1400429 | 0.8743196 | -0.617847 | 0.8238589 | 0.4816496 | 0.6796099 |
| Q5DID3 | Umodl1  | -0.489305 | 0.6482366 | 0.4580139 | 0.8743196 | -0.025158 | 0.415442  | 0.952313  | 0.7710231 |
| Q8CB4  | Unc119b | 0.1444327 | 0.3675483 | 0.7060398 | 0.8910745 | -0.472899 | 0.4551849 | 0.3388866 | 0.6594641 |
| Q4KUS2 | Unc13a  | -0.368681 | 1.0335577 | 0.7318186 | 0.8923639 | 0.4602078 | 0.5624846 | 0.4445305 | 0.6699704 |
| Q6PE14 | Unc13a  | -0.319097 | 0.5642147 | 0.5893528 | 0.8753373 | 0.1254859 | 0.3998981 | 0.7643002 | 0.7393825 |
| Q9Z1N9 | Unc13b  | -1.18811  | 1.7739509 | 0.5244845 | 0.8753373 | -0.362483 | 1.0290242 | 0.7366868 | 0.7345743 |
| Q8K0T7 | Unc13c  | -0.088776 | 0.4245699 | 0.840328  | 0.895241  | -0.627612 | 0.66925   | 0.3845523 | 0.6611124 |
| Q99KD5 | Unc45a  | 0.0169606 | 0.5526723 | 0.9757828 | 0.9072902 | 0.365281  | 0.4563555 | 0.4328671 | 0.6697843 |

|        |         |           |           |           |           |           |           |           |           |
|--------|---------|-----------|-----------|-----------|-----------|-----------|-----------|-----------|-----------|
| Q8CGY6 | Unc45b  | -0.491006 | 0.3352074 | 0.1509956 | 0.8743196 | -1.394219 | 0.443059  | 0.003424  | 0.5840626 |
| O08747 | Unc5c   | -0.107826 | 0.4364206 | 0.8119452 | 0.8943678 | -0.223023 | 0.2751065 | 0.4485037 | 0.6701719 |
| Q8BLN6 | Unc80   | 1.2694749 | 0.527209  | 0.0293668 | 0.8743196 | 0.1230144 | 0.7459602 | 0.8715534 | 0.7571111 |
| Q8VCW4 | Unc93b1 | 0.2150192 | 0.4774188 | 0.6660555 | 0.8900083 | -0.112206 | 0.659356  | 0.8704653 | 0.7571111 |
| O08934 | Uncx    | -0.317642 | 0.2765917 | 0.2687825 | 0.8743196 | 0.0913721 | 0.2770276 | 0.7467827 | 0.7366386 |
| P97931 | Ung     | -1.307729 | 0.7833631 | 0.1157738 | 0.8743196 | 0.8529003 | 0.6097032 | 0.185253  | 0.6405321 |
| Q5FWH2 | Unkl    | 1.414432  | 1.1353755 | 0.2529217 | 0.8743196 | 1.2630299 | 1.2929528 | 0.3663658 | 0.6594641 |
| Q62488 | unknown | -0.092845 | 0.3804574 | 0.8142021 | 0.8943678 | -0.264649 | 0.3012269 | 0.4134297 | 0.6675611 |
| P25688 | Uox     | 0.017664  | 0.1988197 | 0.9293372 | 0.9048359 | -0.388561 | 0.2527193 | 0.1268436 | 0.6209341 |
| Q8VC97 | Upb1    | -0.267136 | 0.4455223 | 0.5509221 | 0.8753373 | -0.310741 | 0.3418345 | 0.3672964 | 0.6594641 |
| Q9Z2C6 | Upk1b   | -0.233152 | 0.4429762 | 0.614918  | 0.8804696 | 0.0215723 | 0.4872198 | 0.9661209 | 0.7740441 |
| Q8CGR7 | Upp2    | 0.8373545 | 1.7326247 | 0.6358706 | 0.8883187 | 1.2310215 | 1.9143124 | 0.5313635 | 0.6939525 |
| Q9CWU6 | Uqcc    | 0.5183748 | 0.8853269 | 0.5765806 | 0.8753373 | 0.1400993 | 0.9013565 | 0.8815784 | 0.7585208 |
| Q8R111 | Uqcr10  | -0.448961 | 0.4938135 | 0.3934858 | 0.8743196 | 0.1974996 | 0.2503639 | 0.4602244 | 0.6712964 |
| Q9D855 | Uqcrb   | -0.262372 | 0.8366258 | 0.7552072 | 0.8923639 | -0.095029 | 0.900109  | 0.916434  | 0.7627031 |
| Q9CZ13 | Uqcrc1  | 0.2325724 | 0.2270008 | 0.3074105 | 0.8743196 | 0.4145359 | 0.2363822 | 0.0820839 | 0.6209341 |
| Q9DB77 | Uqcrc2  | -0.317114 | 0.3012223 | 0.2947388 | 0.8743196 | -0.129571 | 0.2721958 | 0.6351287 | 0.7134626 |
| Q9CR68 | Uqcrfs1 | -0.567213 | 0.5363115 | 0.2948523 | 0.8743196 | -0.596817 | 0.5563434 | 0.2887472 | 0.652142  |
| P99028 | Uqcrh   | 0.8560442 | 0.4844496 | 0.0850459 | 0.8743196 | 0.2569726 | 0.5837921 | 0.6625938 | 0.7215904 |
| Q9CQ69 | Uqcrq   | 0.0047181 | 0.2750849 | 0.9864638 | 0.9080307 | -0.422035 | 0.4110278 | 0.3167831 | 0.6594641 |
| Q9CRB3 | Urah    | 0.2723267 | 0.4256877 | 0.5286672 | 0.8753373 | 0.1683114 | 0.4800764 | 0.7295594 | 0.7324246 |
| Q571H0 | Urb1    | 0.0657481 | 0.5256258 | 0.9039724 | 0.9044421 | 0.2688249 | 0.6114904 | 0.6756027 | 0.7239064 |
| Q3TLD5 | Uri1    | -1.877987 | 0.7476867 | 0.0402948 | 0.8743196 | -1.075237 | 1.0284735 | 0.3360849 | 0.6594641 |
| Q8VC12 | Uroc1   | -0.095651 | 0.216061  | 0.6584596 | 0.8900083 | -0.074985 | 0.2183756 | 0.7317296 | 0.7326734 |
| P70697 | Urod    | -0.228769 | 0.3471165 | 0.5126095 | 0.8753373 | 0.1688775 | 0.3324392 | 0.6137835 | 0.7084882 |
| P51163 | Uros    | -0.159298 | 0.3647705 | 0.6754776 | 0.8900083 | -0.119996 | 0.1505843 | 0.4558944 | 0.6712964 |
| Q9ES64 | Ush1c   | -1.185608 | 1.0137645 | 0.2804742 | 0.8743196 | 0.381043  | 0.485992  | 0.4628299 | 0.6728653 |
| Q80T11 | Ush1g   | 1.6628916 | 0.826217  | 0.0840357 | 0.8743196 | 0.1256478 | 0.9022464 | 0.8938007 | 0.7595603 |
| Q2QI47 | Ush2A   | 0.0306343 | 0.5863843 | 0.9587864 | 0.9067461 | 0.578444  | 0.5702082 | 0.3224871 | 0.6594641 |
| Q78IK2 | Usmg5   | 0.0892012 | 0.3604166 | 0.8067215 | 0.8943678 | -0.315365 | 0.3684375 | 0.4021634 | 0.6636198 |
| Q9Z1Z0 | Uso1    | 0.4956158 | 0.2633543 | 0.0651403 | 0.8743196 | -0.219839 | 0.3622595 | 0.5468072 | 0.6980496 |
| P52479 | Usp10   | 0.3479626 | 0.7724112 | 0.6659798 | 0.8900083 | 0.5337196 | 0.8335083 | 0.5456198 | 0.6979269 |
| Q9JMA1 | Usp14   | 0.4480874 | 0.3177716 | 0.1634305 | 0.8743196 | 0.2888277 | 0.3491924 | 0.4117373 | 0.6675611 |
| Q8R5H1 | Usp15   | -0.862457 | 0.9322777 | 0.385692  | 0.8743196 | -0.356727 | 1.2687394 | 0.788027  | 0.7439428 |
| Q5I043 | Usp28   | -1.267074 | 1.2656482 | 0.3501085 | 0.8743196 | 0.6321626 | 0.7565796 | 0.4354096 | 0.6699704 |
| Q8BZ53 | Usp28   | 0.8388736 | 0.5867875 | 0.1959053 | 0.8743196 | 0.7200965 | 0.6401997 | 0.3036478 | 0.6540599 |
| Q6ZQ93 | Usp34   | 1.291282  | 0.3793931 | 0.0113874 | 0.8743196 | 0.0354366 | 0.5083713 | 0.9466926 | 0.7697868 |
| P35123 | Usp4    | -0.783618 | 0.6257221 | 0.2230306 | 0.8743196 | -0.121424 | 0.2954844 | 0.685491  | 0.724036  |
| B2RQC2 | Usp42   | -3.590857 | 2.8259386 | 0.2444417 | 0.8743196 | 0.1896599 | 0.3007743 | 0.551566  | 0.6980496 |
| Q8BUM9 | Usp43   | 0.0577687 | 0.4162874 | 0.8935389 | 0.9006736 | -0.181485 | 0.5102776 | 0.734266  | 0.7331318 |
| Q8K387 | Usp45   | -0.538783 | 0.6704488 | 0.4480435 | 0.8743196 | -0.578231 | 0.2539189 | 0.0630391 | 0.6209341 |
| Q3V0C5 | Usp48   | -0.168987 | 0.2710811 | 0.5527949 | 0.8753373 | -0.154484 | 0.1383497 | 0.3068666 | 0.6553142 |
| P56399 | Usp5    | 0.3229698 | 0.314994  | 0.3068516 | 0.8743196 | 0.3550502 | 0.3158904 | 0.2630672 | 0.6500471 |
| P15975 | Usp53   | -0.222015 | 0.4797731 | 0.6575842 | 0.8900083 | -0.167609 | 0.376123  | 0.6714981 | 0.7227095 |
| Q80U87 | Usp8    | 0.3594678 | 1.6291825 | 0.8316678 | 0.8943678 | -0.075871 | 2.2554882 | 0.9742566 | 0.776101  |
| P70398 | Usp9x   | 0.3163261 | 0.3629458 | 0.3924599 | 0.8743196 | -0.36547  | 0.674808  | 0.5940828 | 0.7056501 |
| Q8BUB6 | Ust     | -0.334838 | 0.4600295 | 0.4903225 | 0.8743196 | -0.62013  | 0.2707389 | 0.0619007 | 0.6209341 |
| Q640M1 | Utp14a  | 0.173809  | 0.3363737 | 0.6128899 | 0.8794961 | 0.0693465 | 0.3523699 | 0.8470273 | 0.7535496 |
| Q5SSI6 | Utp18   | -0.522416 | 0.9521022 | 0.6002684 | 0.8776021 | 0.1645238 | 0.5721997 | 0.7833802 | 0.743693  |
| Q5XG71 | Utp20   | -0.259065 | 0.5906616 | 0.6741686 | 0.8900083 | -0.947348 | 0.5092947 | 0.1122056 | 0.6209341 |
| O70404 | Vamp8   | 0.2964574 | 0.732164  | 0.6976346 | 0.8900083 | 0.4992687 | 0.9516417 | 0.6186445 | 0.7091807 |
| Q80Z96 | Vangl1  | -0.325973 | 1.0350291 | 0.7619866 | 0.8923639 | 1.3254685 | 0.7500702 | 0.1276306 | 0.6209341 |
| D3YY75 | Vangl2  | -0.468042 | 0.7309811 | 0.542365  | 0.8753373 | -0.23892  | 0.5067224 | 0.6539402 | 0.7198872 |
| Q9Z1Q9 | Vars    | 0.2707901 | 0.2022437 | 0.182718  | 0.8743196 | -0.257432 | 0.2013467 | 0.2034237 | 0.6429844 |
| Q62465 | Vat1    | -0.293245 | 0.2221654 | 0.2066446 | 0.8743196 | -0.25635  | 0.0980965 | 0.0214598 | 0.6209341 |
| Q80TB8 | Vat1l   | 0.000943  | 0.1899059 | 0.9961766 | 0.9103043 | -0.496277 | 0.1971443 | 0.0454508 | 0.6209341 |
| P61759 | Vbp1    | 0.2271529 | 0.4618025 | 0.6299223 | 0.8854638 | 0.1360297 | 0.697628  | 0.8484161 | 0.7536454 |
| Q62059 | Vcan    | -0.337063 | 0.4794876 | 0.4928438 | 0.8748057 | -0.181411 | 0.3388773 | 0.6014603 | 0.7066507 |
| Q64727 | Vcl     | -0.096073 | 0.1355743 | 0.4791252 | 0.8743196 | -0.323976 | 0.1596209 | 0.0434463 | 0.6209341 |
| Q01853 | Vcp     | 0.1885219 | 0.1906405 | 0.323468  | 0.8743196 | 0.0755648 | 0.2116594 | 0.7213534 | 0.7303836 |
| Q60932 | Vdac1   | 0.1772757 | 0.3185016 | 0.5793791 | 0.8753373 | 0.0929219 | 0.3433131 | 0.7874588 | 0.7439428 |

|        |          |           |           |           |           |           |           |           |           |
|--------|----------|-----------|-----------|-----------|-----------|-----------|-----------|-----------|-----------|
| Q60930 | Vdac2    | -0.039871 | 0.351066  | 0.9099389 | 0.9048359 | 0.4505218 | 0.2833991 | 0.1176331 | 0.6209341 |
| Q60931 | Vdac3    | 0.1655008 | 0.2652775 | 0.5363399 | 0.8753373 | -0.170623 | 0.2854732 | 0.5540097 | 0.6980496 |
| Q00731 | Vegfa    | -0.035179 | 0.8896384 | 0.9695618 | 0.9072902 | 0.6242377 | 0.7303993 | 0.4255469 | 0.6694352 |
| Q0VGU4 | Vgf      | -0.344932 | 0.9893326 | 0.7376023 | 0.8923639 | 0.8162776 | 0.8269647 | 0.3617225 | 0.6594641 |
| P85442 | Vgll3    | 1.8947578 | 1.449926  | 0.2325735 | 0.8743196 | 2.1939682 | 1.7053073 | 0.2456582 | 0.6500471 |
| P20152 | Vim      | 0.537212  | 0.4136746 | 0.1982716 | 0.8743196 | -0.477728 | 0.5763473 | 0.4103466 | 0.6675611 |
| Q8VHI5 | Vit      | -1.47084  | 1.0253058 | 0.1945458 | 0.8743196 | -0.009568 | 0.1287369 | 0.9431681 | 0.7691222 |
| Q9CRC0 | Vkorc1   | -1.57727  | 0.7088007 | 0.0613983 | 0.8743196 | -1.225785 | 0.8455166 | 0.19731   | 0.6429844 |
| Q8R280 | Vmn1r199 | 0.5045812 | 0.3273869 | 0.1671597 | 0.8743196 | -0.05865  | 0.4726306 | 0.9052955 | 0.7612577 |
| Q8R277 | Vmn1r206 | -0.927634 | 1.354095  | 0.5153436 | 0.8753373 | -0.074946 | 0.991702  | 0.9422157 | 0.7690587 |
| Q8R2A4 | Vmn1r227 | 1.4208853 | 0.5707272 | 0.0416206 | 0.8743196 | 1.2203222 | 0.5167763 | 0.0561756 | 0.6209341 |
| E9Q4X4 | Vmn2r11  | -0.633351 | 1.1877658 | 0.610379  | 0.8792876 | 0.184903  | 0.7917386 | 0.8231057 | 0.7490596 |
| E9PW21 | Vmn2r74  | -0.715597 | 0.440853  | 0.1253685 | 0.8743196 | -0.397079 | 0.3420117 | 0.2665137 | 0.6500471 |
| E9Q0G7 | Vmn2r83  | -0.023677 | 0.4477311 | 0.9593026 | 0.9067461 | -0.358367 | 0.8950014 | 0.7027225 | 0.7270995 |
| Q99KU0 | Vmp1     | -0.102914 | 0.5082418 | 0.8452924 | 0.8962775 | -0.02451  | 0.228211  | 0.9179731 | 0.7627031 |
| Q5H8C4 | Vps13a   | 1.4451886 | 0.5852228 | 0.0260258 | 0.8743196 | 1.666444  | 0.7178036 | 0.0371394 | 0.6209341 |
| Q80TY5 | Vps13b   | -1.597908 | 1.5747555 | 0.3263363 | 0.8743196 | -1.901287 | 1.8100886 | 0.3126766 | 0.6594641 |
| Q8BX70 | Vps13c   | -0.032194 | 0.3563117 | 0.9292029 | 0.9048359 | -0.033534 | 0.4028349 | 0.9349253 | 0.7669305 |
| Q920Q4 | Vps16    | 1.3132299 | 0.6655175 | 0.089064  | 0.8743196 | 0.0960452 | 0.6129634 | 0.8806286 | 0.7585208 |
| Q9CQ80 | Vps25    | 0.5587947 | 0.9367169 | 0.5695921 | 0.8753373 | 1.051231  | 0.4299603 | 0.0501335 | 0.6209341 |
| P40336 | Vps26a   | 0.0419973 | 0.4332393 | 0.9236154 | 0.9048359 | 0.2142837 | 0.4587133 | 0.6454483 | 0.7175625 |
| Q8C0E2 | Vps26b   | -0.5762   | 1.0075373 | 0.585285  | 0.8753373 | -0.903083 | 1.0090893 | 0.4052834 | 0.6646266 |
| Q9QZ88 | Vps29    | 0.1799248 | 1.2034432 | 0.8853689 | 0.9006736 | 2.2699417 | 0.7635554 | 0.0248654 | 0.6209341 |
| Q9EQH3 | Vps35    | 0.2914597 | 0.3556259 | 0.416599  | 0.8743196 | -0.106085 | 0.3693877 | 0.7754115 | 0.7428116 |
| Q91XD6 | Vps36    | -1.028317 | 1.1605053 | 0.4049778 | 0.8743196 | -0.183838 | 0.4519579 | 0.6982974 | 0.7265263 |
| Q810I0 | Vps37d   | 1.0838733 | 0.890566  | 0.263016  | 0.8743196 | -1.958984 | 2.3875603 | 0.4433019 | 0.6699704 |
| Q8VEJ9 | Vps4a    | 0.6625226 | 1.3607244 | 0.6412115 | 0.8891711 | 1.1544895 | 1.2954443 | 0.4071412 | 0.6652822 |
| P46467 | Vps4b    | 0.081988  | 0.3593499 | 0.8260461 | 0.8943678 | 0.0442053 | 0.2805735 | 0.8799772 | 0.7585208 |
| Q8CCB4 | Vps53    | -0.582769 | 1.9150918 | 0.7697439 | 0.8923639 | 1.0212982 | 0.8883373 | 0.2940323 | 0.6533413 |
| Q3SYK4 | Vrtn     | -0.454664 | 0.3655001 | 0.2535562 | 0.8743196 | -0.833735 | 0.3841342 | 0.073019  | 0.6209341 |
| D3YX43 | Vsig10   | -0.645542 | 0.8520718 | 0.4734091 | 0.8743196 | -0.184419 | 0.4534153 | 0.6983155 | 0.7265263 |
| Q80WA3 | Vsig4    | 0.0257277 | 0.2228896 | 0.9113473 | 0.9048359 | -0.009488 | 0.160987  | 0.9549164 | 0.7716385 |
| Q8R0A6 | Vstm2a   | 0.3228387 | 0.8374923 | 0.7113265 | 0.8910745 | 0.3448248 | 0.6680051 | 0.624179  | 0.7111404 |
| Q91V10 | Vsx1     | -0.424471 | 0.7128492 | 0.5702804 | 0.8753373 | -0.178515 | 0.7149647 | 0.8111609 | 0.7465637 |
| P29788 | Vtn      | 0.9057374 | 0.5252214 | 0.1051594 | 0.8743196 | 0.9555003 | 0.5973684 | 0.1337169 | 0.6209341 |
| Q99KC8 | Vwa5a    | -0.705761 | 0.7811992 | 0.3963204 | 0.8743196 | -0.311138 | 0.2377119 | 0.2384661 | 0.6456045 |
| Q8CC88 | Vwa8     | -0.052138 | 0.1595518 | 0.7441644 | 0.8923639 | -0.097732 | 0.1633186 | 0.5503104 | 0.6980496 |
| Q3U515 | Vwce     | 1.7809603 | 0.8138161 | 0.0648311 | 0.8743196 | 0.5301205 | 1.4025057 | 0.7184557 | 0.7303836 |
| Q6DFV8 | Vwde     | -0.98984  | 0.8596564 | 0.2873587 | 0.8743196 | 0.278914  | 0.3777942 | 0.4882103 | 0.6803412 |
| Q8CIZ8 | Vwf      | 0.7384732 | 1.1091472 | 0.5268609 | 0.8753373 | 0.0728174 | 2.3433485 | 0.9762183 | 0.776185  |
| P32921 | Wars     | -0.633898 | 0.6051438 | 0.3002191 | 0.8743196 | -0.213734 | 0.3359936 | 0.5282298 | 0.69337   |
| O08550 | Wbp7     | 1.1999187 | 0.9302098 | 0.2380475 | 0.8743196 | -0.247917 | 1.5302503 | 0.8766154 | 0.7581843 |
| Q7TT15 | Wbscr17  | 0.6026445 | 0.7150769 | 0.4272121 | 0.8743196 | 0.1229042 | 0.8395108 | 0.8884008 | 0.7592752 |
| Q6VNB8 | Wdfy3    | -1.319539 | 0.7417056 | 0.0954967 | 0.8743196 | -0.283019 | 0.2309283 | 0.2421    | 0.6496933 |
| Q8C456 | Wdpcp    | 2.4005003 | 2.06323   | 0.2827607 | 0.8743196 | 2.1984535 | 2.2517405 | 0.3666041 | 0.6594641 |
| O88342 | Wdr1     | -0.250575 | 0.1791895 | 0.1635549 | 0.8743196 | -0.218231 | 0.1604326 | 0.1755047 | 0.6347112 |
| Q91V09 | Wdr13    | -1.433114 | 4.5629503 | 0.7626164 | 0.8923639 | -0.353887 | 4.4633705 | 0.9393826 | 0.7681455 |
| Q8BHB4 | Wdr3     | -0.100636 | 0.2597195 | 0.7099144 | 0.8910745 | -0.117482 | 0.1358723 | 0.4204507 | 0.6694352 |
| Q8K4P0 | Wdr33    | -1.165723 | 0.6541987 | 0.1179652 | 0.8743196 | -3.024814 | 1.5127651 | 0.0924869 | 0.6209341 |
| Q5U4F6 | Wdr34    | -0.906361 | 0.4478579 | 0.0826695 | 0.8743196 | -0.313332 | 0.4851427 | 0.5422697 | 0.6979269 |
| Q8BND3 | Wdr35    | 0.3836623 | 0.2873702 | 0.223632  | 0.8743196 | -1.008266 | 0.7789286 | 0.2431008 | 0.6496933 |
| Q8CBE3 | Wdr37    | 1.132079  | 1.8066258 | 0.5507849 | 0.8753373 | 1.578084  | 2.085212  | 0.4778255 | 0.6788349 |
| Q9EP82 | Wdr4     | 0.6786287 | 0.8365079 | 0.4439195 | 0.8743196 | 0.5366317 | 1.0291145 | 0.6207331 | 0.7091807 |
| Q8CGF6 | Wdr47    | 1.1167856 | 0.6434156 | 0.1261948 | 0.8743196 | 0.2636157 | 0.9072803 | 0.7811723 | 0.7434726 |
| Q8BH57 | Wdr48    | 0.0343474 | 0.3874597 | 0.9305346 | 0.9048359 | 0.1119741 | 0.4317287 | 0.7994177 | 0.7439428 |
| P61965 | Wdr5     | -0.676924 | 0.7030554 | 0.367705  | 0.8743196 | -0.384156 | 0.716304  | 0.6110396 | 0.7082928 |
| Q3V0J7 | Wdr64    | -0.119375 | 0.8281615 | 0.8894487 | 0.9006736 | -0.632881 | 0.5270208 | 0.275055  | 0.6500471 |
| Q9D180 | Wdr65    | -0.722474 | 2.7490416 | 0.8002646 | 0.8943678 | 1.1404626 | 1.254199  | 0.3982372 | 0.6622315 |
| Q920I9 | Wdr7     | 0.3487136 | 0.5735465 | 0.5623893 | 0.8753373 | 0.1621671 | 0.8079736 | 0.8475572 | 0.7536454 |
| A6PWY4 | Wdr76    | 0.2844052 | 0.8698333 | 0.753254  | 0.8923639 | 0.5317051 | 0.7566478 | 0.5085681 | 0.6853401 |
| Q6ZPG2 | Wdr90    | -0.643855 | 0.6983868 | 0.3872427 | 0.8743196 | -0.201653 | 0.6211802 | 0.756482  | 0.73805   |

|        |         |           |           |           |           |           |           |           |           |
|--------|---------|-----------|-----------|-----------|-----------|-----------|-----------|-----------|-----------|
| Q66JT0 | Wee2    | -1.421869 | 0.7065313 | 0.0840597 | 0.8743196 | -1.692783 | 1.2116866 | 0.2118833 | 0.6429844 |
| Q14AE4 | Wfdc3   | 0.1152234 | 0.9131605 | 0.9031365 | 0.9042231 | -0.525251 | 1.4556619 | 0.7305881 | 0.7325694 |
| Q571B6 | Whamm   | 0.6168035 | 0.9565206 | 0.5395805 | 0.8753373 | 0.7001266 | 0.8104946 | 0.4208688 | 0.6694352 |
| Q6P2L6 | Whsc111 | 0.5017322 | 0.4910814 | 0.3231245 | 0.8743196 | 0.7651847 | 0.6315983 | 0.2472641 | 0.6500471 |
| Q8CHP5 | Wibg    | 0.110094  | 0.787121  | 0.8906242 | 0.9006736 | 0.2045242 | 1.0415003 | 0.8473535 | 0.7536454 |
| O88286 | Wiz     | 1.6075488 | 1.1086003 | 0.1903218 | 0.8743196 | -0.372736 | 2.4936234 | 0.8860762 | 0.7592752 |
| Q6DID7 | Wls     | 0.8173869 | 0.4997612 | 0.1459473 | 0.8743196 | 0.106828  | 0.4977865 | 0.8371825 | 0.7519044 |
| F6S7V4 | Wnk1    | 0.2398492 | 0.8253657 | 0.77978   | 0.8940257 | 1.4447345 | 0.9371858 | 0.1741152 | 0.6342694 |
| Q80XP9 | Wnk3    | 0.0164991 | 0.562987  | 0.9774382 | 0.9072902 | -0.047447 | 0.4842889 | 0.9251452 | 0.7634944 |
| Q91XU0 | Wmip1   | 0.2807916 | 0.8632385 | 0.7544779 | 0.8923639 | -1.208436 | 1.2709347 | 0.3784059 | 0.6594641 |
| O54929 | Wsb2    | -1.577654 | 1.306169  | 0.2663252 | 0.8743196 | -0.07411  | 0.2752144 | 0.7967348 | 0.7439428 |
| Q80XH4 | Wscd1   | 0.2234372 | 0.6263141 | 0.731791  | 0.8923639 | 0.1913632 | 1.166804  | 0.8751115 | 0.7581089 |
| D4PHA7 | Wscd2   | 2.0700712 | 0.8848073 | 0.0518776 | 0.8743196 | 1.7926947 | 0.9887839 | 0.1197713 | 0.6209341 |
| Q7TQJ8 | Wtip    | 0.4320441 | 0.3756753 | 0.2619426 | 0.8743196 | 0.1231797 | 0.3615598 | 0.73689   | 0.7345769 |
| Q5SXA9 | Wwc1    | -0.240867 | 0.8656745 | 0.7888665 | 0.8943678 | -0.908704 | 0.8510353 | 0.3266936 | 0.6594641 |
| Q8BZZ3 | Wwp1    | 0.9536633 | 0.7343762 | 0.235221  | 0.8743196 | 0.2927324 | 0.8612006 | 0.7455063 | 0.7359583 |
| Q00519 | Xdh     | 0.4408641 | 0.4212238 | 0.2998497 | 0.8743196 | 0.6817581 | 0.425017  | 0.1152586 | 0.6209341 |
| O70373 | Xirp1   | -0.160897 | 0.4415459 | 0.7169601 | 0.8910745 | -0.061621 | 0.3758692 | 0.8704642 | 0.7571111 |
| Q4U4S6 | Xirp2   | 0.0512171 | 0.5522342 | 0.9273333 | 0.9048359 | 0.2456419 | 0.4563517 | 0.5994839 | 0.7061107 |
| Q9QXY7 | Xk      | -0.282565 | 0.1798357 | 0.1601211 | 0.8743196 | -0.776619 | 0.2907355 | 0.0369663 | 0.6209341 |
| Q5GH67 | Xkr4    | -0.398649 | 0.7408639 | 0.6071935 | 0.8792876 | -0.483173 | 0.3417606 | 0.2071534 | 0.6429844 |
| P05531 | Xlr     | 1.5774592 | 1.2565543 | 0.2496217 | 0.8743196 | 2.192353  | 0.9934286 | 0.0694434 | 0.6209341 |
| Q6P1B1 | Xpnpep1 | 0.9400012 | 0.9500732 | 0.3285671 | 0.8743196 | 0.7732106 | 1.0098631 | 0.4491622 | 0.6701719 |
| B7ZMP1 | Xpnpep3 | -1.154994 | 0.8601094 | 0.2212303 | 0.8743196 | -0.764863 | 0.2178965 | 0.0126682 | 0.6209341 |
| Q6P5F9 | Xpo1    | 0.6833911 | 0.7389921 | 0.3697291 | 0.8743196 | 0.0058661 | 0.7367651 | 0.9937682 | 0.7793235 |
| Q924C1 | Xpo5    | 0.4204088 | 1.0045181 | 0.6881102 | 0.8900083 | 0.9758901 | 0.5641798 | 0.1344013 | 0.6209341 |
| Q9EPK7 | Xpo7    | 0.5579124 | 0.4088632 | 0.2146384 | 0.8743196 | -0.38196  | 0.5140163 | 0.4854947 | 0.6796099 |
| P23475 | Xrcc6   | 0.0577507 | 0.9630253 | 0.9538572 | 0.9060514 | 0.0306951 | 0.7760372 | 0.9697323 | 0.7751233 |
| Q3U4G3 | Xxylt1  | 2.5844065 | 1.3528275 | 0.0977038 | 0.8743196 | 2.4954004 | 1.5386649 | 0.1559738 | 0.6211692 |
| Q3TNA1 | Xylb    | -0.251715 | 0.3475233 | 0.4710138 | 0.8743196 | -0.558905 | 0.5301247 | 0.2954283 | 0.6540599 |
| Q811B1 | Xylt1   | -0.071042 | 0.3315478 | 0.8364414 | 0.8943678 | 0.0610526 | 0.2922628 | 0.8414407 | 0.7524932 |
| P46938 | Yap1    | -1.010044 | 1.2224553 | 0.4216152 | 0.8743196 | -1.165675 | 0.9343938 | 0.2342126 | 0.6442378 |
| Q91WQ3 | Yars    | -1.111101 | 0.5677257 | 0.0692111 | 0.8743196 | -0.052341 | 0.2475367 | 0.8358178 | 0.7519044 |
| P62960 | Ybx1    | -0.224299 | 0.3532546 | 0.5301191 | 0.8753373 | -0.073109 | 0.2979814 | 0.8080431 | 0.745845  |
| Q9Z2C8 | Ybx2    | -0.999766 | 1.0034527 | 0.3522782 | 0.8743196 | -2.57809  | 0.830547  | 0.0210067 | 0.6209341 |
| Q3TUF7 | Yeats2  | -0.176464 | 0.4771122 | 0.722424  | 0.8910745 | -0.249917 | 0.543417  | 0.6617821 | 0.7215904 |
| Q9EQQ2 | Yipf5   | -1.791604 | 1.2073698 | 0.1814094 | 0.8743196 | -0.053215 | 0.1258224 | 0.6870786 | 0.7242619 |
| Q9CQW1 | Ykt6    | -0.351068 | 0.3548419 | 0.3381764 | 0.8743196 | -0.989903 | 0.4638487 | 0.0524554 | 0.6209341 |
| B2RR83 | Ythdc2  | 1.5605281 | 1.5352145 | 0.3255129 | 0.8743196 | 2.4905121 | 1.6413119 | 0.1531045 | 0.6211692 |
| Q9CQV8 | Ywhab   | 0.1450572 | 0.3577196 | 0.6869462 | 0.8900083 | -0.11619  | 0.4818547 | 0.810656  | 0.7465637 |
| P62259 | Ywhae   | -0.178915 | 0.1689688 | 0.2910579 | 0.8743196 | -0.065157 | 0.1556669 | 0.6760927 | 0.7239064 |
| P61982 | Ywhag   | 0.0930672 | 0.2751529 | 0.7359986 | 0.8923639 | 0.3763381 | 0.236251  | 0.1153203 | 0.6209341 |
| P68510 | Ywhah   | -0.433586 | 0.5019809 | 0.3914771 | 0.8743196 | 0.4162029 | 0.429259  | 0.3371141 | 0.6594641 |
| P68254 | Ywhaq   | 0.5038019 | 0.5328587 | 0.3492545 | 0.8743196 | 0.5737665 | 0.5445861 | 0.2982437 | 0.6540599 |
| P63101 | Ywhaz   | -0.229012 | 0.338834  | 0.5006302 | 0.8753373 | 0.045881  | 0.2141581 | 0.8308453 | 0.7517136 |
| Q8BGC4 | Zadh2   | 1.3254802 | 0.5636534 | 0.025227  | 0.8743196 | 1.1542546 | 0.6801432 | 0.1011825 | 0.6209341 |
| O88799 | Zan     | 0.1841508 | 0.2146124 | 0.3997119 | 0.8743196 | -0.396448 | 0.4139935 | 0.3496889 | 0.6594641 |
| Q0P5X5 | Zbbx    | -0.576642 | 1.094078  | 0.6144387 | 0.8801715 | 0.2246488 | 0.3926929 | 0.5880493 | 0.7049451 |
| Q8K0L9 | Zbtb20  | -0.235556 | 0.2177397 | 0.3151849 | 0.8743196 | -0.280554 | 0.2125636 | 0.2350022 | 0.6442378 |
| Q9Z0G7 | Zbtb22  | 1.7205246 | 0.8293898 | 0.0767115 | 0.8743196 | 1.5790116 | 0.8283625 | 0.1052633 | 0.6209341 |
| Q8BN78 | Zbtb33  | 0.5445546 | 0.7318677 | 0.4810643 | 0.8743196 | -0.639366 | 0.9771181 | 0.5371527 | 0.695758  |
| Q811F1 | Zbtb41  | 0.7680571 | 0.8990116 | 0.4211922 | 0.8743196 | 1.0422335 | 0.7781462 | 0.2289498 | 0.6442378 |
| Q8K088 | Zbtb6   | -0.864441 | 0.7006259 | 0.2570882 | 0.8743196 | -1.046512 | 0.4863921 | 0.0749425 | 0.6209341 |
| Q8BJH1 | Zc2hc1a | -0.205931 | 0.3873669 | 0.6114381 | 0.8792876 | -0.090854 | 0.3310951 | 0.7929765 | 0.7439428 |
| Q8BJ05 | Zc3h14  | 0.3399779 | 0.92538   | 0.7241821 | 0.8910745 | 1.4538179 | 0.4339426 | 0.0154145 | 0.6209341 |
| Q0P678 | Zc3h18  | 0.2040235 | 1.3461243 | 0.8838067 | 0.9006736 | 1.8384536 | 1.0819317 | 0.1401881 | 0.6209341 |
| Q8CHP0 | Zc3h3   | 1.1703872 | 0.7513948 | 0.1401681 | 0.8743196 | -0.114855 | 0.9985486 | 0.9101854 | 0.7618305 |
| B2RX14 | Zcchc11 | 0.7161349 | 1.1492227 | 0.5529408 | 0.8753373 | 1.1788879 | 1.1757422 | 0.3547252 | 0.6594641 |
| Q69ZB8 | Zcchc2  | 1.3428022 | 1.3232197 | 0.3439864 | 0.8743196 | 1.2436515 | 1.4973942 | 0.4380239 | 0.6699704 |
| Q8BPK2 | Zcchc3  | 0.0508884 | 0.4757705 | 0.9178216 | 0.9048359 | -0.770758 | 1.1791674 | 0.5375695 | 0.695758  |
| Q5SS00 | Zdbf2   | 1.1844573 | 0.7847228 | 0.1749402 | 0.8743196 | 0.5929685 | 1.3110349 | 0.6669518 | 0.7215904 |

|        |          |           |           |           |           |           |           |           |           |
|--------|----------|-----------|-----------|-----------|-----------|-----------|-----------|-----------|-----------|
| Q14AK4 | Zdhhc11  | -0.608888 | 0.5332667 | 0.2910828 | 0.8743196 | -0.192333 | 0.7234982 | 0.799263  | 0.7439428 |
| Q9D270 | Zdhhc21  | 0.9867629 | 1.1002938 | 0.3996072 | 0.8743196 | -0.028581 | 1.0744993 | 0.9796419 | 0.7762605 |
| Q7TS63 | Zfat     | -0.456664 | 0.4148079 | 0.2882913 | 0.8743196 | -0.476    | 0.4920665 | 0.3510227 | 0.6594641 |
| Q61329 | Zfhx3    | -0.843075 | 0.5258523 | 0.1297226 | 0.8743196 | -0.957817 | 0.9115392 | 0.312506  | 0.6594641 |
| Q9JUN2 | Zfhx4    | -1.401783 | 1.3079777 | 0.3193997 | 0.8743196 | 0.7252735 | 1.1641112 | 0.5561913 | 0.6980496 |
| Q08376 | Zfp161   | 2.0521723 | 1.8019677 | 0.2922347 | 0.8743196 | 2.9762344 | 1.743934  | 0.1387653 | 0.6209341 |
| P10076 | Zfp26    | -0.365346 | 0.4148779 | 0.3924196 | 0.8743196 | -1.497798 | 0.5958204 | 0.0259034 | 0.6209341 |
| Q9Z2U2 | Zfp292   | -0.731398 | 0.2983931 | 0.0269818 | 0.8743196 | -1.096113 | 0.6368385 | 0.1089131 | 0.6209341 |
| Q3TU59 | Zfp36l2  | 0.1054904 | 1.0971334 | 0.9260955 | 0.9048359 | 1.1556762 | 0.8532222 | 0.2243636 | 0.6442378 |
| Q02525 | Zfp39    | -0.89446  | 1.1135145 | 0.4482274 | 0.8743196 | -0.732008 | 0.2526214 | 0.0274184 | 0.6209341 |
| G3UVV3 | Zfp407   | -1.003787 | 0.8840097 | 0.2935469 | 0.8743196 | -1.875694 | 0.8596248 | 0.0718637 | 0.6209341 |
| Q8C6P8 | Zfp57    | 0.0772604 | 0.4478699 | 0.8679211 | 0.898064  | -0.799354 | 0.8074596 | 0.3604199 | 0.6594641 |
| Q9D082 | Zfp715   | -0.936776 | 0.8691474 | 0.3168534 | 0.8743196 | 0.1009234 | 0.6344579 | 0.8788328 | 0.7585208 |
| Q8BIV1 | Zfp719   | 3.0202829 | 1.1951393 | 0.0393973 | 0.8743196 | 2.2461049 | 1.4469778 | 0.1715836 | 0.6323131 |
| F6XU43 | Zfp827   | -0.768482 | 0.8722196 | 0.4075143 | 0.8743196 | -0.024043 | 0.149001  | 0.8771039 | 0.7584325 |
| A2ADM8 | Zfp831   | -0.828275 | 0.5898996 | 0.2030695 | 0.8743196 | -1.470431 | 0.454522  | 0.0177957 | 0.6209341 |
| Q6DFU8 | Zfp948   | -0.850248 | 0.2676258 | 0.0155554 | 0.8743196 | -0.344806 | 0.5403243 | 0.5469464 | 0.6980496 |
| O35615 | Zfpm1    | 1.5091207 | 1.0497833 | 0.193719  | 0.8743196 | -0.388951 | 1.2081907 | 0.7584272 | 0.7380771 |
| O88532 | Zfr      | 0.8477204 | 0.3767658 | 0.0591987 | 0.8743196 | 0.4911573 | 0.4368242 | 0.3038115 | 0.6540599 |
| Q80Y56 | Zfyve20  | 0.4875597 | 0.6434935 | 0.4733745 | 0.8743196 | 0.4020405 | 0.7931241 | 0.6303054 | 0.7120542 |
| Q8C0C0 | Zhx2     | -0.468905 | 0.3187481 | 0.184739  | 0.8743196 | -0.583892 | 0.627957  | 0.3883398 | 0.6611124 |
| Q62521 | Zic3     | 0.6508147 | 1.1052288 | 0.5744634 | 0.8753373 | 0.8907605 | 1.175802  | 0.4773922 | 0.6786974 |
| Q9Z1D8 | Zkscan5  | -0.245588 | 0.9712866 | 0.8076498 | 0.8943678 | 0.3282171 | 0.9860229 | 0.7505557 | 0.7375672 |
| Q6P1E1 | Zmiz1    | -0.493259 | 0.5428496 | 0.3779043 | 0.8743196 | -0.605203 | 0.4064776 | 0.1603692 | 0.6243427 |
| Q80W54 | Zmpste24 | 0.3650127 | 1.5868909 | 0.8246553 | 0.8943678 | 2.3009722 | 1.5478461 | 0.1876837 | 0.6405321 |
| Q3U2E2 | Zmym5    | -0.409316 | 0.5469228 | 0.4786057 | 0.8743196 | -0.498506 | 0.3743707 | 0.2313499 | 0.6442378 |
| Q8C0R7 | Zmynd15  | 0.7033152 | 1.2474132 | 0.5904747 | 0.8753373 | 0.6359719 | 1.1238987 | 0.5920044 | 0.7054772 |
| O88466 | Znf106   | -0.204661 | 0.4254953 | 0.637461  | 0.8883187 | 0.1628878 | 0.3684016 | 0.6656489 | 0.7215904 |
| Q68FE8 | Znf280d  | -0.283415 | 0.4927257 | 0.5831646 | 0.8753373 | -0.6186   | 0.3076357 | 0.0910511 | 0.6209341 |
| Q99LI5 | Znf281   | -0.003818 | 0.3419491 | 0.9914038 | 0.909535  | -7.452574 | 3.6412232 | 0.0866342 | 0.6209341 |
| Q99PP2 | Znf318   | 1.1357613 | 0.7263906 | 0.1387673 | 0.8743196 | 0.9965879 | 0.928875  | 0.3028299 | 0.6540599 |
| Q80V23 | Znf32    | -0.302316 | 0.3922696 | 0.452863  | 0.8743196 | -0.233832 | 0.3371641 | 0.5001847 | 0.6823283 |
| Q9R0B7 | Znf346   | -1.281579 | 1.5823709 | 0.4446472 | 0.8743196 | -1.570518 | 0.8517862 | 0.1147732 | 0.6209341 |
| Q571J5 | Znf354c  | -0.633609 | 0.4228821 | 0.1777256 | 0.8743196 | -0.866063 | 0.9633517 | 0.4032818 | 0.6638484 |
| Q80TS5 | Znf423   | -1.717756 | 1.5708291 | 0.3103563 | 0.8743196 | -1.277488 | 1.3063402 | 0.3658834 | 0.6594641 |
| Q6V5K9 | Znf474   | -0.079539 | 1.3998242 | 0.9562759 | 0.9062426 | 1.4993143 | 1.1431537 | 0.237618  | 0.6456045 |
| Q7TSH3 | Znf516   | 0.1877875 | 0.3376513 | 0.595425  | 0.8770074 | -0.053226 | 0.1999857 | 0.7990357 | 0.7439428 |
| Q9D0B1 | Znf524   | 1.8108514 | 0.8479144 | 0.0700827 | 0.8743196 | 0.9692524 | 1.2269705 | 0.4596256 | 0.6712964 |
| Q8K083 | Znf536   | 0.180851  | 0.9465456 | 0.8538989 | 0.896366  | -1.922611 | 0.823293  | 0.0582195 | 0.6209341 |
| Q0GGX2 | Znf541   | 0.5854643 | 0.7254214 | 0.4322391 | 0.8743196 | 0.2210055 | 0.7023403 | 0.7580055 | 0.7380771 |
| Q8BY46 | Znf574   | -1.814515 | 1.0369907 | 0.1236311 | 0.8743196 | -0.419109 | 0.7724624 | 0.6069805 | 0.7082928 |
| Q6YND2 | Znf653   | -0.08085  | 0.3574307 | 0.8275114 | 0.8943678 | -0.111967 | 0.1860116 | 0.5692491 | 0.6997388 |
| Q4VA44 | Znf664   | -0.454932 | 0.3166857 | 0.1939968 | 0.8743196 | -0.702292 | 0.4308507 | 0.1542208 | 0.6211692 |
| Q2TL60 | Znf667   | -0.048601 | 0.6167472 | 0.9393957 | 0.9048359 | -0.847088 | 0.4684666 | 0.120573  | 0.6209341 |
| Q8R1N0 | Znf830   | 0.9554399 | 1.1731405 | 0.4422204 | 0.8743196 | 1.7644286 | 1.3139922 | 0.2279041 | 0.6442378 |
| Q8BI99 | Znf879   | 0.6158443 | 0.471525  | 0.2328075 | 0.8743196 | -0.043229 | 0.7795265 | 0.9575758 | 0.7721509 |
| Q62522 | Zpbp     | -0.097946 | 0.2360774 | 0.6906445 | 0.8900083 | -0.088065 | 0.1826535 | 0.6467881 | 0.7177722 |
| O54692 | Zw10     | -0.166947 | 0.4419629 | 0.7168165 | 0.8910745 | -0.090973 | 0.5167484 | 0.8660472 | 0.7571111 |
| A2CE44 | Zxda;    | 0.1815908 | 1.6242579 | 0.9141209 | 0.9048359 | 0.3731345 | 1.416042  | 0.8009771 | 0.7439635 |
| Q62523 | Zyx      | 0.6254756 | 0.9488263 | 0.5308412 | 0.8753373 | -0.321413 | 1.5580225 | 0.8433821 | 0.7527981 |
| Q5SSH7 | Zzef1    | -0.367257 | 0.5383261 | 0.5170303 | 0.8753373 | 0.3012406 | 0.4860448 | 0.55819   | 0.6980496 |

**Stab 5 Symbol (ID) to UniProt identifiers**

| Gene ID    | UniProtKB   | Entrez Gene | Gene ID  | UniProtKB  | Entrez Gene |
|------------|-------------|-------------|----------|------------|-------------|
| A2m        | Q61838      | NA          | Mapkapk5 | O54992-2   | 17165       |
| A2m        | Q61838      | NA          | Mat2a    | Q3THS6     | 232087      |
| A430033K04 | Q7TPL8      | NA          | Mb       | P04247     | 17189       |
| Aars       | Q8BGQ7      | 234734      | Mb       | P04247     | 17189       |
| Abca3      | Q8R420      | 27410       | Mcm2     | P97310     | NA          |
| Abhd14b    | Q8VCR7      | 76491       | Mcm3     | P25206     | 17215       |
| Abl2       | Q4JIM5      | 11352       | Mcm4     | P49717     | 17217       |
| Abp1       | Q8JZQ5      | NA          | Mdh1     | P14152     | 17449       |
| Acaca      | Q5SWU9      | 107476      | Mdp1     | Q9D967     | 67881       |
| Acad9      | Q3ULL9      | NA          | Me1      | P06801     | 17436       |
| Acads      | Q6LCR2      | NA          | Mier1    | Q5UAK0     | 71148       |
| Ace3       | NP_00109861 | NA          | Mif      | P34884     | 17319       |
| Acin1      | Q9JIX8      | 56215       | Mmrn2    | A6H6E2     | 105450      |
| Acly       | Q91V92      | 104112      | Mocos    | Q14CH1     | 68591       |
| Aco1       | P28271      | 11428       | Mpi      | Q924M7     | 110119      |
| Acot1      | O55137      | 26897       | Mpp4     | Q6P7F1     | 227157      |
| Acot1      | O55137      | 26897       | Mpzl2    | O70255     | 14012       |
| Acot13     | Q9CQR4      | 66834       | Msn      | P26041     | 17698       |
| Acot7      | Q91V12      | 70025       | Msn      | P26041     | 17698       |
| Acta2      | P62737      | 11475       | Msra     | Q9D6Y7     | 110265      |
| Acta2      | P62737      | 11475       | Mtap     | Q9CQ65     | 66902       |
| Acta2      | P62737      | 11475       | Mtap4    | P27546     | 17758       |
| Acta2      | P62737      | 11475       | Mtmr6    | Q8VE11     | 219135      |
| Actb       | P60710      | 11461       | Mtmr9    | Q9Z2D0     | 210376      |
| Actb       | P60710      | 11461       | Mtpn     | P62774     | 14489       |
| Actb       | P60710      | 11461       | Muc5ac   | O88715     | NA          |
| Actb       | P60710      | 11461       | Mug1     | P28665     | 17836       |
| Actbl2     | Q8BFZ3      | 238880      | Mug1     | P28665     | 17836       |
| Actn1      | Q7TPR4      | 109711      | Mup9     | P02762     | 100038948   |
| Actn2      | Q9JI91      | 11472       | Mut      | Q3UFU2     | NA          |
| Actn3      | O88990      | 11474       | Mybpc3   | O70468     | NA          |
| Actn4      | P57780      | 60595       | Mybpc3   | O70468     | NA          |
| Actr2      | P61161      | 66713       | Myef2    | Q8C854     | 17876       |
| Acvrl1     | Q61288      | 11482       | Myh1     | Q5SX40     | 17879       |
| Acy3       | Q91XE4      | 71670       | Myh11    | O08638     | 17880       |
| Adad1      | Q5SUE7      | 21744       | Myh11    | O08638     | 17880       |
| Adam6a     | B2RSY5      | NA          | Myh11    | O08638     | 17880       |
| Add1       | Q9QYC0      | 11518       | Myh13    | B1AR69     | NA          |
| Adhfe1     | Q8R0N6      | 76187       | Myh15    | XP_0010027 | NA          |
| Adipoq     | Q60994      | 11450       | Myh3     | P13541     | 17883       |
| Adk        | P55264      | 11534       | Myh3     | P13541     | 17883       |
| Adprhl1    | Q8BGK2      | 234072      | Myh3     | P13541     | 17883       |
| Adrbk1     | Q99MK8      | 110355      | Myh6     | Q02566     | 17888       |
| Adrm1      | Q9JKV1      | 56436       | Myh6     | Q02566     | 17888       |
| Adsl       | P54822      | 11564       | Myh6     | Q02566     | 17888       |
| Adssl1     | P28650      | 11565       | Myh7     | Q91Z83     | 140781      |
| Agbl2      | Q8CDK2      | 271813      | Myh7b    | A2AQP0     | 668940      |
| Agbl4      | Q09LZ8      | 78933       | Myh7b    | A2AQP0     | 668940      |
| Agl        | Q8CE68      | NA          | Myh8     | P13542     | 17885       |

|          |        |        |            |        |        |
|----------|--------|--------|------------|--------|--------|
| Ahcy     | P50247 | 269378 | Myh9       | Q8VDD5 | 17886  |
| Ahdc1    | Q6PAL7 | 230793 | Myl1       | P05977 | 17901  |
| Ahnak    | A0JLR7 | NA     | Myl12b     | Q3THE2 | 67938  |
| Ahsg     | P29699 | 11625  | Myl2       | P51667 | 17906  |
| Aig1     | Q9D8B1 | 66253  | Myl2       | P51667 | 17906  |
| Ak1      | Q9R0Y5 | 11636  | Myl3       | P09542 | 17897  |
| Akna     | Q80VW7 | 100182 | Myl4       | P09541 | 17896  |
| Akr1a4   | Q9JII6 | 58810  | Myl6       | Q60605 | 17904  |
| Akr1b10  | Q8BIV6 | NA     | Mylk3      | Q3UIZ8 | 213435 |
| Akr1b3   | P45376 | 11677  | Mylk3      | Q3UIZ8 | 213435 |
| Akr1b7   | P21300 | 11997  | Myog       | P12979 | 17928  |
| Akr1b8   | P45377 | 14187  | Myom1      | Q62234 | 17929  |
| Akr1e1   | Q9DCT1 | 56043  | Myom2      | O55124 | NA     |
| Alb      | P07724 | 11657  | Naca       | P70670 | 17938  |
| Alb      | P07724 | 11657  | Naip2      | Q9QUK4 | 17948  |
| Aldh1a1  | P24549 | 11668  | Nampt      | Q99KQ4 | 59027  |
| Aldh9a1  | Q9JLJ2 | NA     | Nap1l1     | P28656 | 53605  |
| Aldoa    | P05064 | 11674  | Nasp       | Q99MD9 | 50927  |
| Alx4     | O35137 | 11695  | Nbeal1     | Q7TMN9 | NA     |
| Anapc1   | P53995 | 17222  | Ncapg2     | Q6DFV1 | 76044  |
| Ankrd35  | A6H648 | 213121 | Nceh1      | Q8BLF1 | 320024 |
| Anp32a   | O35381 | 11737  | Ncl        | P09405 | 17975  |
| Anxa1    | P10107 | 16952  | Ncrna00085 | B7ZWC7 | NA     |
| Anxa11   | P97384 | 11744  | Ndrp2      | Q9QYG0 | 29811  |
| Anxa2    | P07356 | 12306  | Ndufa12    | Q7TMF3 | NA     |
| Anxa3    | O35639 | 11745  | Ndufb6     | Q3UIU2 | 230075 |
| Anxa4    | P97429 | 11746  | Nedd4l     | Q8CFI0 | 83814  |
| Anxa5    | P48036 | 11747  | Nedd8      | P29595 | 18002  |
| Anxa6    | P14824 | 11749  | Nefm       | P08553 | 18040  |
| Anxa6    | P14824 | 11749  | Nek1       | P51954 | 18004  |
| Anxa6    | Q3V2Z4 | 11749  | Nek4       | Q9Z1J2 | 23955  |
| Anxa6    | P14824 | 11749  | Nfatc4     | Q8K120 | 73181  |
| Anxa7    | Q07076 | 11750  | Nid1       | P10493 | 18073  |
| Ap1b1    | O35643 | 11764  | Nin        | Q61043 | 18080  |
| Ap1b1    | O35643 | 11764  | Nlgn1      | Q99K10 | 192167 |
| Apba3    | O88888 | 57267  | Nme1       | P15532 | 18102  |
| Apeh     | Q8R146 | 235606 | Nme1       | P15532 | 18102  |
| Api5     | O35841 | NA     | Nono       | Q99K48 | 53610  |
| Aplp1    | Q03157 | NA     | Npepps     | Q11011 | 19155  |
| Apoa1    | Q00623 | 11806  | Npm1       | Q61937 | 18148  |
| Apoa2    | A7YL62 | NA     | Nqo1       | Q64669 | 18104  |
| Apoa2    | P09813 | 11807  | Nr1d2      | Q60674 | 353187 |
| Apoa4    | P06728 | 11808  | Nrif1      | Q8BS00 | NA     |
| Apoo     | Q9DCZ4 | 68316  | Nsd1       | O88491 | NA     |
| Aprt     | P08030 | 11821  | Nsfl1c     | Q9CZ44 | 386649 |
| Aqp1     | Q02013 | 11826  | Nt5c3      | Q9D020 | 107569 |
| Arcn1    | Q5XJY5 | 213827 | Nt5c3l     | Q3UFY7 | 68106  |
| Arhgap1  | Q5FWK3 | 228359 | Ntn5       | Q3UQ22 | 243967 |
| Arhgap20 | Q6IFT4 | 244867 | Obscn      | A2AAJ9 | 380698 |
| Arhgdia  | Q99PT1 | 192662 | Ogdhl      | B2RXT3 | NA     |
| Arhgdib  | Q61599 | 11857  | Olfr1225   | A6H6E6 | NA     |

|          |        |        |          |        |        |
|----------|--------|--------|----------|--------|--------|
| Arnt2    | Q61324 | 11864  | Olfr187  | Q8VEX6 | 258319 |
| Arpc2    | Q9CVB6 | 76709  | Orc6     | Q9WUJ8 | 56452  |
| Arpc4    | P59999 | 68089  | Orm2     | P07361 | 18406  |
| Asb15    | Q8VHS6 | NA     | Osmr     | O70458 | 18414  |
| Aspdh    | Q9DCQ2 | 68352  | Otol1    | Q4ZJM7 | 229389 |
| Asph     | A2AL76 | NA     | Otub1    | Q7TQI3 | 107260 |
| Atic     | Q9CWJ9 | 108147 | Oxnad1   | Q8VE38 | 218885 |
| Atox1    | O08997 | 11927  | P2rx7    | Q9Z1M0 | 18439  |
| Atp1a3   | Q6PIC6 | 232975 | P4hb     | P09103 | 18453  |
| Atp1a3   | Q6PIC6 | 232975 | Pabpc1   | P29341 | 18458  |
| Atp1b1   | P14094 | 11931  | Pabpc4   | Q91YZ8 | NA     |
| Atp2a2   | O55143 | 11938  | Pafah1b1 | P63005 | 18472  |
| Atp2a2   | O55143 | 11938  | Paics    | Q9DCL9 | 67054  |
| Atp2a2   | O55143 | 11938  | Pak2     | Q8CIN4 | 224105 |
| Atp2a2   | O55143 | 11938  | Pam      | P97467 | 18484  |
| Atp2b2   | Q9R0K7 | 11941  | Papd7    | Q6PB75 | 210106 |
| Atp4a    | Q64436 | NA     | Pard3b   | Q9CSB4 | 72823  |
| Atp6v1e2 | Q9D593 | 74915  | Pc       | Q05920 | NA     |
| Atp8b2   | P98199 | 54667  | Pcbp1    | P60335 | 23983  |
| B2m      | P01887 | 12010  | Pcbp3    | P57722 | 59093  |
| Bag3     | Q9JLV1 | 29810  | Pcid2    | Q8BFV2 | 234069 |
| Bahcc1   | Q3UHR0 | 268515 | Pclo     | Q9QYX7 | 26875  |
| Banf1    | O54962 | 23825  | Pcmt1    | P23506 | 18537  |
| Barx1    | Q9ER42 | 12022  | Pcna     | P17918 | 18538  |
| Baz1b    | Q9Z277 | 22385  | Pcsk1    | P63239 | 18548  |
| BC031353 | Q69ZK7 | 235493 | Pcyt1b   | Q811Q9 | 236899 |
| Bfsp1    | A2AMT1 | 12075  | Pdcd11   | Q6NS46 | 18572  |
| Bgn      | P28653 | 12111  | Pdcd6ip  | Q9WU78 | 18571  |
| Blvra    | Q9CY64 | 109778 | Pde4d    | O70286 | NA     |
| Blvrb    | Q923D2 | 233016 | Pdia3    | P27773 | 14827  |
| Bpgm     | P15327 | 12183  | Pdlim1   | O70400 | 54132  |
| Bphl     | Q8R164 | NA     | Pdlim5   | Q8CI51 | 56376  |
| Bpifb1   | Q61114 | 228801 | Pebp1    | P70296 | 23980  |
| Brd9     | Q3UQU0 | NA     | Pfas     | Q5SUR0 | 237823 |
| Brpf1    | Q3U109 | NA     | Pfkl     | P12382 | 18641  |
| Brwd3    | A2AHJ4 | 382236 | Pfkl     | P12382 | 18641  |
| Bsg      | P18572 | 12215  | Pfkl     | P12382 | 18641  |
| C1qtnf9  | Q4ZJN1 | 239126 | Pfkm     | P47857 | 18642  |
| C3       | P01027 | 12266  | Pfn1     | P62962 | 18643  |
| Calm3    | P62204 | 12315  | Pgam1    | Q9DBJ1 | 18648  |
| Calm3    | P62204 | 12315  | Pgam2    | O70250 | 56012  |
| Calr     | P14211 | 12317  | Pgam2    | O70250 | 56012  |
| Calu     | O35887 | 12321  | Pgd      | Q9DCD0 | 110208 |
| Camk2a   | P11798 | 12322  | Pgk1     | P09411 | 18655  |
| Camk2d   | Q6PHZ2 | 108058 | Pgk2     | P09041 | 18663  |
| Camkk2   | Q8C078 | 207565 | Pglis    | Q9CQ60 | 66171  |
| Canx     | P35564 | 12330  | Pgm2     | Q9D0F9 | 72157  |
| Cap1     | P40124 | 12331  | Pgm2     | A2CEK3 | NA     |
| Capn2    | O08529 | 12334  | Pgm5     | Q8BZF8 | 226041 |
| Capns1   | O88456 | 12336  | Pgp      | Q8CHP8 | 67078  |
| Capza1   | P47753 | 12340  | Phpt1    | Q9DAK9 | 75454  |

|         |           |        |         |           |        |
|---------|-----------|--------|---------|-----------|--------|
| Capzb   | P47757    | 12345  | Pja1    | O55176    | 18744  |
| Car1    | P13634    | 12346  | Pkm2    | P52480-2  | 18746  |
| Car2    | P00920    | 12349  | Pkp1    | P97350    | 18772  |
| Car3    | P16015    | 12350  | Pla2g3  | OTTMUSP00 | 237625 |
| Card6   | Q8BWE0    | NA     | Plaa    | P27612    | 18786  |
| Carkd   | Q9CZ42    | 69225  | Plekho2 | Q8K124    | 102595 |
| Casq2   | O09161    | 12373  | Plin1   | Q8CGN5    | 103968 |
| Cav1    | P49817    | 12389  | Plin3   | Q9DBG5    | 66905  |
| Cbr1    | P48758    | 12408  | Plvap   | Q91VC4    | 84094  |
| Cbr4    | Q91VT4    | 234309 | Pml     | Q60953    | 18854  |
| Cbx4    | O55187    | 12418  | Pmm2    | Q9Z2M7    | 54128  |
| Ccar1   | Q8CH18    | 67500  | Pnmt    | P40935    | 18948  |
| Ccbl2   | Q71RI9    | 229905 | Pnp     | P23492    | 18950  |
| Ccdc158 | Q8CDI6    | 320696 | Ppa1    | Q9D819    | 67895  |
| Ccdc18  | Q640L5    | 73254  | Ppfia3  | P60469    | 76787  |
| Ccnb2   | P30276    | 12442  | Ppfia3  | P60469    | 76787  |
| Cct2    | P80314    | 12461  | Ppia    | P17742    | NA     |
| Cct3    | P80318    | 12462  | Ppib    | P24369    | 19035  |
| Cct4    | P80315    | 12464  | Ppp1r7  | Q3UM45    | 66385  |
| Cct4    | ENSMUSP00 | 12464  | Ppp2ca  | P63330    | 19052  |
| Cct4    | ENSMUSP00 | 12464  | Ppp2cb  | P62715    | 19053  |
| Cct5    | P80316    | 12465  | Ppp2r1a | Q76MZ3    | 51792  |
| Cct6a   | P80317    | 12466  | Ppp3cb  | P48453    | 19056  |
| Cct6a   | P80317    | 12466  | Prdm16  | A2A935    | 70673  |
| Cct7    | P80313    | 12468  | Prdx1   | P35700    | 18477  |
| Cct8    | P42932    | 12469  | Prdx2   | Q61171    | 21672  |
| Cd2ap   | Q9JLQ0    | 12488  | Prdx6   | O08709    | 11758  |
| Cd36    | Q08857    | 12491  | Prdx6   | Q8BPD3    | 11758  |
| Cdc42   | P60766    | 12540  | Prep    | Q9QUR6    | 19072  |
| Cdh3    | P10287    | 12560  | Prkar1a | Q9DBC7    | 19084  |
| Cdk14   | O35495    | 18647  | Prkar1b | P12849    | 19085  |
| Cdv3    | Q4VAA2    | 321022 | Prkar2a | P12367    | 19087  |
| Ces1a   | Q5FWH4    | NA     | Prkar2a | P12367    | 19087  |
| Ces1c   | P23953    | 13884  | Prkcsh  | O08795    | 19089  |
| Ces1c   | P23953    | 13884  | Prkg1   | P0C605    | 19091  |
| Ces1c   | P23953    | 13884  | Prmt5   | Q8CIG8    | 27374  |
| Ces1d   | Q8VCT4    | 104158 | Prodh   | Q9WU79    | 19125  |
| Cfb     | P04186    | 14962  | Prosc   | Q9Z2Y8    | 114863 |
| Cfd     | P03953    | 11537  | Prpf6   | Q91YR7-2  | 68879  |
| Cfl1    | P18760    | NA     | Prpf8   | Q99PV0    | 192159 |
| Cfl1    | P18760    | NA     | Prph    | P15331    | 19132  |
| Cfl2    | P45591    | 12632  | Prps2   | Q9CS42    | 110639 |
| Chat    | Q03059    | NA     | Psma1   | Q9R1P4    | 26440  |
| Chchd10 | Q2V056    | NA     | Psma2   | P49722    | NA     |
| Chchd2  | Q9D1L0    | 14004  | Psma4   | Q9R1P0    | 26441  |
| Chga    | P26339    | 12652  | Psma5   | Q9Z2U1    | 26442  |
| Chi3l3  | O35744    | 12655  | Psma6   | Q9QUM9    | 26443  |
| Chrm5   | Q920H4    | 213788 | Psma8   | Q9CWH6    | 73677  |
| Chrnbl  | P09690    | 11443  | Psmb2   | Q9R1P3    | 26445  |
| Chsy3   | Q5DTK1    | 78923  | Psmb3   | Q9R1P1    | 26446  |
| Cit     | P49025    | 12704  | Psmb4   | P99026    | 19172  |

|            |           |        |         |        |        |
|------------|-----------|--------|---------|--------|--------|
| Ckb        | Q04447    | 12709  | Psemb5  | O55234 | 19173  |
| Ckm        | P07310    | 12715  | Psemb6  | Q60692 | 19175  |
| Ckm        | P07310    | 12715  | Psemb7  | P70195 | 19177  |
| Ckm        | P07310    | 12715  | Psmc1   | P62192 | 19179  |
| Clic5      | Q8B XK9   | 224796 | Psmc3   | O88685 | 19182  |
| Clip1      | Q922J3    | 56430  | Psmc4   | P54775 | 23996  |
| Clta       | O08585    | 12757  | Psmc5   | P62196 | 19184  |
| Cltb       | Q6IRU5    | 74325  | Psmc6   | P62334 | 67089  |
| Clu        | Q06890    | 12759  | Psmc1   | Q3TXS7 | 70247  |
| Clybl      | Q8R4N0    | 69634  | Psmc11  | Q8BG32 | 69077  |
| Cmpk1      | Q9DBP5    | NA     | Psmc12  | Q9D8W5 | 66997  |
| Cndp2      | Q9D1A2    | 66054  | Psmc13  | Q9WVJ2 | 23997  |
| Cnn1       | Q08091    | 12797  | Psmc14  | O35593 | 59029  |
| Col15a1    | O35206    | 12819  | Psmc2   | Q8VDM4 | 21762  |
| Col19a1    | Q0VF58    | 12823  | Psmc3   | P14685 | 22123  |
| Col6a1     | Q04857    | 12833  | Psmc4   | O35226 | 19185  |
| Col6a6     | Q8C6K9    | 245026 | Psmc6   | Q99JI4 | 66413  |
| Col7a1     | Q63870    | 12836  | Psmc8   | Q9CX56 | 57296  |
| Comt       | O88587    | 12846  | Psmc9   | Q9CR00 | NA     |
| Coq6       | Q8R1S0    | NA     | Psme1   | P97371 | 19186  |
| Cotl1      | Q9CQI6    | 72042  | Ptgr2   | Q8VDQ1 | 77219  |
| Cox6a1     | P43024    | NA     | Ptma    | P26350 | 19231  |
| Cp         | Q61147    | 12870  | Ptms    | Q9D0J8 | NA     |
| Cpne1      | Q8C166    | 266692 | Ptpn18  | Q61152 | 19253  |
| Cpne5      | Q8JZW4    | 240058 | Ptpn9   | O35239 | 56294  |
| Crif2      | Q8CII9-3  | 57914  | Ptprb   | B2RU80 | 19263  |
| Crif3      | Q9Z2L7    | 54394  | Pvrl1   | Q9JKF6 | 58235  |
| Crocc      | Q8CJ40    | 230872 | Pygb    | Q8CI94 | 110078 |
| Cry1       | P97784    | 12952  | Pygb    | Q8CI94 | 110078 |
| Cryab      | P23927    | 12955  | Pygb    | Q8CI94 | 110078 |
| Cryz       | P47199    | 12972  | Pygm    | Q9WUB3 | 19309  |
| Csmd3      | Q80T79    | 239420 | Qars    | Q3TIN2 | NA     |
| Cspg4      | Q8VHY0    | 121021 | Qtrtd1  | B8ZXI1 | 106248 |
| Csrp1      | P97315    | 13007  | Rab11b  | P46638 | 19326  |
| Csrp2bp    | Q8CID0    | 228714 | Rab14   | Q91V41 | 68365  |
| Csrp3      | P50462    | 13009  | Rab15   | Q8K386 | 104886 |
| Cst3       | P21460    | 13010  | Rab18   | P35293 | 19330  |
| Cstb       | Q62426    | 13014  | Rab2a   | P53994 | 59021  |
| Ctnna3     | Q65CL1    | 216033 | Rab2a   | P53994 | 59021  |
| Cuta       | Q9CQ89    | 67675  | Rab33b  | O35963 | NA     |
| Cyp19a1    | P28649    | 13075  | Rab3a   | P63011 | 19339  |
| Cyp2a22    | B2RXZ2    | NA     | Rab7    | P51150 | 19349  |
| D10Jhu81e  | Q9D172    | 28295  | Rab8a   | P55258 | 17274  |
| D130043K22 | Q5SZV5    | 210108 | Rac3    | P60764 | 170758 |
| D17Wsu104e | Q9CPT4    | 28106  | Rad23a  | Q8BRA9 | 19358  |
| Dak        | Q8VC30    | 225913 | Rad54l2 | Q99NG0 | NA     |
| Dars       | Q922B2    | 226414 | Ran     | P62827 | 19384  |
| Dchs2      | XP_143371 | 229459 | Ran     | P62827 | 19384  |
| Dclk3      | Q8BWQ5    | 245038 | Ranbp1  | P34022 | 19385  |
| Dclre1b    | Q8C7W7    | 140917 | Rap1a   | P62835 | 109905 |
| Dctn2      | Q99KJ8    | 69654  | Rap1gap | A2ALS4 | NA     |

|         |        |        |         |        |           |
|---------|--------|--------|---------|--------|-----------|
| Dctpp1  | Q9QY93 | 66422  | Rars    | Q9D0I9 | 104458    |
| Ddb1    | Q3U1J4 | 13194  | Rasgrf1 | P27671 | 19417     |
| Ddt     | O35215 | 13202  | Rbbp4   | Q60972 | 19646     |
| Ddx17   | Q501J6 | 67040  | Rbm14   | Q8C2Q3 | 56275     |
| Ddx17   | Q501J6 | 67040  | Rbmxt   | O35479 | 19656     |
| Ddx39   | Q8VDW0 | 68278  | Rbpms   | Q9CPU5 | NA        |
| Ddx5    | Q61656 | 13207  | Rell1   | Q8K2J7 | 100532    |
| Des     | P31001 | 13346  | Rffl    | Q6ZQM0 | 67338     |
| Dhx35   | Q8K1G9 | NA     | Rhoa    | Q9QUI0 | 11848     |
| Dhx9    | O70133 | 13211  | Rhoc    | Q62159 | 11853     |
| Diexf   | Q8BTT6 | 215193 | Rhod    | Q99JI5 | NA        |
| Dip2b   | Q3UH60 | 239667 | Ric3    | Q8BPM6 | 320360    |
| Dnase1  | P49183 | 13419  | Rictor  | Q6QI06 | 78757     |
| Dnm1    | P39053 | 13429  | Ripk3   | Q9QZL0 | 56532     |
| Dnm1l   | Q8K1M6 | 74006  | Ripply1 | Q2WG77 | 622473    |
| Dnpep   | Q9Z2W0 | 13437  | Rnf151  | Q9CQ29 | 67504     |
| Dpep1   | P31428 | 13479  | Rnf8    | Q6A027 | NA        |
| Dpp9    | Q8BVG4 | 224897 | Rnh1    | Q91VI7 | 107702    |
| Dpysl2  | O08553 | 12934  | Rnpc3   | Q3UZ01 | 67225     |
| Dpysl2  | O08553 | 12934  | Rnpep   | Q8VCT3 | 215615    |
| Dpysl2  | O08553 | 12934  | Rpl10   | Q6ZWW3 | 110954    |
| Dpysl2  | O08553 | 12934  | Rpl10a  | P53026 | 19896     |
| Dpysl3  | Q62188 | 22240  | Rpl12   | P35979 | 269261    |
| Drd5    | Q8BLD9 | 13492  | Rpl17   | Q9CPR4 | 319195    |
| Dsg4    | Q7TMD7 | 16769  | Rpl18   | P35980 | 19899     |
| Dstn    | Q9R0P5 | 56431  | Rpl21   | O09167 | 19933     |
| Dusp3   | Q9D7X3 | 72349  | Rpl22   | P67984 | 19934     |
| Dzip1   | Q8BMD2 | 66573  | Rpl24   | Q8BP67 | 68193     |
| Dzip3   | Q7TPV2 | 224170 | Rpl26   | P61255 | 19941     |
| Ecel1   | Q9JMI0 | 13599  | Rpl30   | P62889 | 19946     |
| Echdc1  | Q9D9V3 | 52665  | Rpl31   | P62900 | 114641    |
| Eci2    | Q9WUR2 | 23986  | Rpl32   | P62911 | 19951     |
| Eef1a1  | P10126 | 13627  | Rpl34   | Q9D1R9 | 68436     |
| Eef1a1  | P10126 | 13627  | Rpl5    | P47962 | 100503670 |
| Eef1b2  | O70251 | 55949  | Rpl6    | P47911 | 19988     |
| Eef1d   | P57776 | 66656  | Rpl7a   | P12970 | 27176     |
| Eef1g   | Q9D8N0 | 67160  | Rpl9    | P51410 | 20005     |
| Eef2    | P58252 | 13629  | Rplp0   | P14869 | 11837     |
| Efhd2   | Q9D8Y0 | 27984  | Rplp1   | P47955 | 56040     |
| Eftud1  | Q8C0D5 | 101592 | Rps11   | P62281 | 27207     |
| Ehbp1   | Q69ZW3 | 216565 | Rps13   | P62301 | 68052     |
| Ehd2    | Q8BH64 | 259300 | Rps14   | P62264 | 20044     |
| Eif2s3x | Q9Z0N1 | 26905  | Rps15a  | P62245 | 267019    |
| Eif3a   | P23116 | 13669  | Rps16   | P14131 | NA        |
| Eif3e   | P60229 | 16341  | Rps18   | P62270 | 20084     |
| Eif3i   | Q9QZD9 | 54709  | Rps2    | P25444 | NA        |
| Eif4a2  | P10630 | 13682  | Rps20   | P60867 | 67427     |
| Eif4a2  | P10630 | 13682  | Rps21   | Q9CQR2 | 66481     |
| Eif4a2  | P10630 | 13682  | Rps27   | Q6ZWU9 | 57294     |
| Eif5a   | P63242 | 276770 | Rps28   | P62858 | 54127     |
| Elavl1  | P70372 | 15568  | Rps3    | P62908 | 27050     |

|          |        |        |           |        |        |
|----------|--------|--------|-----------|--------|--------|
| Eml2     | Q7TNG5 | 72205  | Rps3a     | P97351 | 20091  |
| Eno1     | P17182 | 13806  | Rps6ka1   | P18653 | 20111  |
| Eno1     | P17182 | 13806  | Rps7      | P62082 | 20115  |
| Eno1     | P17182 | 13806  | Rps8      | P62242 | 20116  |
| Eno1     | P17182 | 13806  | Rps9      | Q6ZWN5 | 76846  |
| Eno2     | P17183 | 13807  | Rpsa      | P14206 | 16785  |
| Eno3     | P21550 | 13808  | Rragc     | Q99K70 | 54170  |
| Ep400    | Q8CHI8 | 75560  | Rras      | P10833 | 20130  |
| Epdr1    | Q99M71 | 105298 | Ruvbl1    | P60122 | 56505  |
| Ephx2    | P34914 | 13850  | Ryr2      | O70181 | NA     |
| Eprs     | Q8CGC7 | 107508 | S100a13   | P97352 | 20196  |
| Erap1    | Q9EQH2 | 80898  | Samsn1    | P57725 | 67742  |
| Esd      | Q9R0P3 | 13885  | Sar1a     | P36536 | 20224  |
| Etf1     | Q8BWY3 | 225363 | Sars      | P26638 | 20226  |
| EU599041 | B2M0R7 | NA     | Sart3     | Q9JLI8 | 53890  |
| Ezr      | P26040 | 22350  | Sash3     | Q8K352 | 74131  |
| Ezr      | P26040 | 22350  | Sbf1      | Q6ZPE2 | NA     |
| Ezr      | P26040 | 22350  | Sccpdh    | Q8R127 | 109232 |
| F2       | P19221 | 14061  | Sdpr      | Q63918 | 20324  |
| Fabp3    | P11404 | 14077  | Sec31b    | Q3TZ89 | 240667 |
| Fabp3    | P11404 | 14077  | Selenbp1  | P17563 | 20341  |
| Fabp4    | P04117 | 11770  | Selenbp1  | P17563 | 20341  |
| Fabp5    | Q05816 | 16592  | Sema3d    | Q8BH34 | 108151 |
| Fabp9    | O08716 | 21884  | Senp6     | Q6P7W0 | 215351 |
| Fahd1    | Q8R0F8 | 68636  | Serpina1a | P07758 | 20700  |
| Fam126a  | Q6P9N1 | 84652  | Serpina1a | P07758 | 20700  |
| Fam135a  | Q6NS59 | 68187  | Serpina1a | P07758 | 20700  |
| Fam162a  | Q9D6U8 | 70186  | Serpina1a | P07758 | 20700  |
| Fam178a  | Q6P9P0 | 226151 | Serpina1a | P07758 | 20700  |
| Fam193b  | Q3U2K0 | 212483 | Serpina1a | P07758 | 20700  |
| Fam196b  | Q6GQV1 | 574403 | Serpina1b | P22599 | 20701  |
| Fam198b  | Q3UPI1 | 68659  | Serpina1b | P22599 | 20701  |
| Fam36a   | Q9D7J4 | 66359  | Serpina1d | Q00897 | 20703  |
| Fam43b   | A2AM80 | NA     | Serpina1e | Q00898 | 20704  |
| Fam54b   | Q9CWE0 | 76824  | Serpina3f | Q80X76 | 238393 |
| Fasn     | P19096 | 14104  | Serpina3k | P07759 | 20714  |
| Fbln5    | Q9WVH9 | 23876  | Serpina3k | P07759 | 20714  |
| Fbn1     | Q61554 | 14118  | Serpina3k | P07759 | 20714  |
| Fetub    | Q9QXC1 | NA     | Serpina3k | P07759 | 20714  |
| Fezf2    | Q9ESP5 | 54713  | Serpinb6a | Q60854 | 20719  |
| Fga      | Q08284 | NA     | Serpinc1  | P32261 | 11905  |
| Fgb      | Q8K0E8 | 110135 | Serpinf2  | Q61247 | 18816  |
| Fgf1     | P61148 | 14164  | Set       | Q9EQU5 | 56086  |
| Fgg      | Q8VCM7 | 99571  | Setd4     | P58467 | 224440 |
| Fhl1     | P97447 | 14199  | Sf3b2     | Q3UAI4 | NA     |
| Fhl2     | O70433 | 14200  | Sf3b3     | Q921M3 | 101943 |
| Ficd     | Q8BIX9 | 231630 | Sfn       | O70456 | 55948  |
| Fkbp1a   | P26883 | 14225  | Sfn       | O70456 | 55948  |
| Fkbp4    | P30416 | 14228  | Sfn       | O70456 | 55948  |
| Fkbp5    | Q64378 | 14229  | Sfpq      | Q8VIJ6 | 71514  |
| Fkrp     | Q8CG64 | 243853 | Sfpq      | Q8VIJ6 | 71514  |

|         |           |           |          |           |        |
|---------|-----------|-----------|----------|-----------|--------|
| Flg2    | Q2VIS4    | 229574    | Sh3bgrl  | Q9JJU8    | 56726  |
| Flii    | Q9JJ28    | 14248     | Sh3bgrl3 | Q91VW3    | 73723  |
| Flna    | Q8BTM8    | 192176    | Shc4     | Q6S5L9    | 271849 |
| Flnc    | Q8VHX6    | NA        | Shcbp1   | Q9Z179    | 20419  |
| Fn1     | P11276    | 14268     | Shmt2    | Q3TFD0    | NA     |
| Fscn1   | Q61553    | 14086     | Sim1     | Q61045    | 20464  |
| Fsip2   | A2ARZ3    | 241516    | Sirt5    | Q8K2C6    | 68346  |
| Fth1    | P09528    | 14319     | Slc14a2  | Q8R4T9    | 27411  |
| Ftl1    | P29391    | 14325     | Slc17a5  | Q8BN82    | 235504 |
| Ftl1    | P29391    | 14325     | Slc27a3  | OTTMUSP00 | 26568  |
| Ftsjd1  | Q8BWQ4    | 234728    | Slc2a4   | P14142    | 20528  |
| Fubp1   | Q91WJ8    | 51886     | Slc33a1  | Q99J27    | 11416  |
| Fuca2   | Q99KR8    | 66848     | Slc35d3  | Q8BGF8    | 76157  |
| G6pdx   | Q00612    | 14381     | Slc39a6  | Q8C145    | 106957 |
| Galk1   | Q9R0N0    | NA        | Slc4a1   | P04919    | 20533  |
| Gart    | Q64737    | 14450     | Slmap    | Q3URD3    | 83997  |
| Gatad1  | Q920S3    | 67210     | Slpi     | P97430    | 20568  |
| Gatad2b | Q8VHR5    | 229542    | Smg1     | Q8BKX6    | 233789 |
| Gbe1    | Q9D6Y9    | 74185     | Smg7     | Q5RJH6    | 226517 |
| Gc      | P21614    | 14473     | Smok4a   | A0JLX3    | 272667 |
| Gdi1    | P50396    | 14567     | Smtn     | Q921U8    | 29856  |
| Gdi1    | P50396    | 14567     | Snd1     | Q78PY7    | 56463  |
| Gdi2    | Q61598    | 14569     | Snrnp200 | Q69ZZ3    | NA     |
| Gfap    | P03995    | 14580     | Snrnp70  | Q62376    | 20637  |
| Gfra3   | Q35118    | 14587     | Snx29    | Q9D3S3    | 74478  |
| Ggt7    | Q99JP7    | 207182    | Snx3     | O70492    | 54198  |
| Glo1    | Q9CPU0    | 109801    | Sorbs2   | Q3UTJ2    | 234214 |
| Glrx    | Q9QUH0    | 93692     | Spaca7   | Q9D2S4    | 78634  |
| Glrx3   | Q9CQM9    | 30926     | Spata5l1 | Q3TER3    | NA     |
| Gm10068 | P23198    | 100504483 | Spna2    | P16546    | 20740  |
| Gm10653 | Q3V2B9    | 677044    | Spnb2    | Q62261    | 20742  |
| Gm12918 | P47963    | 100039656 | Spop     | Q6ZWS8    | 20747  |
| Gm13654 | P62754    | 667739    | Spr      | Q64105    | NA     |
| Gm14279 | O55142    | 100046034 | Srcap    | Q8BKT0    | NA     |
| Gm14303 | P62274    | 629957    | Srcin1   | B1AQX8    | NA     |
| Gm1564  | A2AG06    | 268491    | Srf      | Q9JM73    | 20807  |
| Gm16844 | Q2T9K9    | NA        | Srl      | Q7TQ48    | 106393 |
| Gm19686 | Q3UZ54    | 100503429 | Srsf1    | Q6PDM2    | 110809 |
| Gm1971  | Q3TKZ2    | 100038680 | Srsf3    | P84104    | 20383  |
| Gm4876  | Q8C8H6    | 232599    | Srsf6    | Q3TWW8    | NA     |
| Gm5514  | XP_904967 | 433229    | St13     | Q99L47    | 70356  |
| Gm5728  | ENSMUSP00 | 435949    | St18     | Q80TY4    | 240690 |
| Gm5728  | ENSMUSP00 | 435949    | St8sia1  | A1E2I1    | NA     |
| Gm5728  | ENSMUSP00 | 435949    | Stat1    | P42225    | NA     |
| Gm5728  | ENSMUSP00 | 435949    | Stip1    | Q60864    | 20867  |
| Gm7030  | ENSMUSP00 | 630294    | Stmn1    | P54227    | 16765  |
| Gm7356  | XP_977970 | 664821    | Stoml1   | Q8CI66    | 69106  |
| Gm9769  | Q9R0Q7    | 100043508 | Strbp    | Q91WM1    | 20744  |
| Gmpr    | Q9DCZ1    | 66355     | Stt3a    | P46978    | NA     |
| Gnai2   | P08752    | 14678     | Syncrip  | Q7TMK9    | 56403  |
| Gnai2   | P08752    | 14678     | T        | P20293    | 20997  |

|           |           |        |          |          |        |
|-----------|-----------|--------|----------|----------|--------|
| Gnao1     | P18872    | 14681  | Taar7e   | Q5QD09   | 276742 |
| Gnb2      | P62880    | 14693  | Tacc2    | Q2VPC8   | NA     |
| Gnb2l1    | P68040    | 14694  | Tagap    | B2RWW0   | 72536  |
| Got1      | P05201    | 14718  | Taldo1   | Q93092   | 21351  |
| Got1      | OTTMUSP00 | 14718  | Tanc2    | A2A690   | 77097  |
| Gpd1      | P13707    | 14555  | Tapbp    | Q9R233   | 21356  |
| Gpi1      | P06745    | 14751  | Tardbp   | Q921F2   | 230908 |
| Gpld1     | O70362    | NA     | Tbc1d23  | Q8K0F1   | 67581  |
| Gpr149    | Q3UVY1    | 229357 | Tbc1d2b  | Q3U0J8   | 67016  |
| Gpx3      | P46412    | 14778  | Tbca     | P48428   | 21371  |
| Grhpr     | Q91Z53    | 76238  | Tbck     | Q8BM85   | 271981 |
| Gsdma2    | Q32M21    | 76758  | Tceb2    | P62869   | 67673  |
| Gsn       | P13020    | 227753 | Tcf20    | Q9EPQ8   | 21411  |
| Gsta4     | P24472    | 14860  | Tcof1    | O08784   | 21453  |
| Gstm2     | P15626    | 14863  | Tcp1     | P11983   | 21454  |
| Gstm6     | O35660    | 14867  | Tdgf1    | P51865   | 21667  |
| Gstm6     | O35660    | 14867  | Tead3    | P70210   | 21678  |
| Gsto1     | O09131    | 14873  | Tecta    | O08523   | 21683  |
| Gstp1     | P19157    | 14870  | Tex15    | Q3V162   | NA     |
| Gstp1     | P19157    | 14870  | Tgds     | Q8VDR7   | 76355  |
| Gtf2f2    | Q8R0A0    | 68705  | Tgs1     | Q923W1   | 116940 |
| Guk1      | Q64520    | 14923  | Thap11   | Q9JJD0   | 59016  |
| Gxylt2    | Q3UMM9    | 232313 | Thap3    | A2A8D4   | NA     |
| Gyg       | Q9R062    | 27357  | Thbs1    | P35441   | NA     |
| Gys1      | Q9Z1E4    | 14936  | Thegl    | Q9DA15   | NA     |
| H28       | Q9BDB7    | 15061  | Themis   | Q8BGW0   | 210757 |
| H2afz     | P0C0S6    | 51788  | Thnsl1   | Q8BH55   | 208967 |
| H2-D1     | Q61893    | 14964  | Tkt      | P40142   | 21881  |
| H2-Ke6    | P50171    | 14979  | Tln1     | P26039   | 21894  |
| H60a      | Q3TM01    | 15101  | Tln2     | Q71LX4   | 70549  |
| Hba-a1    | Q9CY10    | 15122  | Tmco4    | Q91WU4   | 77056  |
| Hba-a1    | P01942    | 15122  | Tmem145  | Q8C4U2   | 330485 |
| Hba-a1    | P01942    | 15122  | Tmem201  | A2A8U2   | 230917 |
| Hbb-b1    | P02088    | NA     | Tnfrsf8  | Q60846   | 21941  |
| Hbb-b1    | A8DUK2    | 15129  | Tnncl    | P19123   | 21924  |
| Hbb-b1    | A8DUK7    | NA     | Tnni3    | P48787   | 21954  |
| Hbb-b1    | P02088    | NA     | Tnnt2    | P50752   | 21956  |
| Hbb-b1    | P02088    | NA     | Tollip   | Q9QZ06   | 54473  |
| Hbb-b2    | P02089    | 15130  | Tpi1     | P17751   | 21991  |
| Hcrr2     | P58308    | 387285 | Tpm1     | P58771   | 22003  |
| Hddc3     | Q9D114    | 68695  | Tpm1     | P58771-2 | 22003  |
| Hint1     | P70349    | 15254  | Tpm1     | P58771   | 22003  |
| Hist1h2bf | P10853    | 319180 | Tpm2     | P58774   | 22004  |
| Hist1h2bf | P10853    | 319180 | Tpm3     | P21107   | 59069  |
| Hist1h2bf | P10853    | 319180 | Tpm3     | P21107   | 59069  |
| Hist1h3h  | P68433    | 319152 | Tpm3     | P21107   | 59069  |
| Hist2h4   | P62806    | 97122  | Tpm3     | P21107   | 59069  |
| Hltf      | Q6PCN7    | 20585  | Tpm4     | Q6IRU2   | 326618 |
| Hmcn1     | Q8C716    | 545370 | Tpt1     | P63028   | 22070  |
| Hnrnpa0   | Q9CX86    | NA     | Traf3ip1 | Q149C2   | 74019  |
| Hnrnpa1   | P49312    | 15382  | Trdn     | Q8VIN8   | NA     |

|           |        |        |         |           |        |
|-----------|--------|--------|---------|-----------|--------|
| Hnrnpa2b1 | O88569 | 53379  | TremI2  | Q2LA85    | 328833 |
| Hnrnpab   | Q99020 | 15384  | Trf     | Q921I1    | 22041  |
| Hnrnpd    | Q60668 | 11991  | Trim13  | Q9CYB0    | 66597  |
| Hnrnph1   | O35737 | 59013  | Trim15  | Q8R096    | NA     |
| Hnrnph1   | O35737 | 59013  | Trim28  | Q62318    | 21849  |
| Hnrnpk    | P61979 | 15387  | Trim40  | Q3UWA4    | 195359 |
| Hnrnpl    | Q8R081 | 15388  | Trim72  | Q1XH17    | 434246 |
| Hnrnpm    | Q9D0E1 | 76936  | Trio    | Q0KL02    | 223435 |
| Hnrnpu    | Q8VEK3 | 51810  | Triobp  | Q99KW3    | 110253 |
| Hnrnpul2  | Q00PI9 | 68693  | Tro     | Q8R564    | NA     |
| Hps3      | Q91VB4 | 12807  | Tsc22d1 | OTTMUSP00 | 21807  |
| Hps5      | P59438 | 246694 | Ttn     | A2ASS6    | 22138  |
| Hpx       | Q91X72 | 15458  | Ttr     | P07309    | 22139  |
| Hsf2bp    | B0V2W8 | NA     | Tuba1b  | P05213    | 22143  |
| Hsfy2     | Q80Y37 | NA     | Tuba1b  | P05213    | 22143  |
| Hsp90aa1  | P07901 | 15519  | Tuba1b  | P05213    | 22143  |
| Hsp90aa1  | P07901 | 15519  | Tuba1b  | P05213    | 22143  |
| Hsp90ab1  | P11499 | 15516  | Tuba1b  | P05213    | 22143  |
| Hsp90b1   | P08113 | 22027  | Tuba1b  | P05213    | 22143  |
| Hspa1l    | P16627 | 15482  | Tuba1b  | P05213    | 22143  |
| Hspa1l    | P16627 | 15482  | Tuba1b  | P05213    | 22143  |
| Hspa1l    | P16627 | 15482  | Tuba3a  | P05214    | 22144  |
| Hspa1l    | P16627 | 15482  | Tuba4a  | P68368    | 22145  |
| Hspa4     | Q61316 | 15525  | Tubb1   | A2AQ07    | NA     |
| Hspa4l    | P48722 | 18415  | Tubb2a  | Q7TMM9    | 22151  |
| Hspa4l    | P48722 | 18415  | Tubb2b  | Q9CWF2    | 73710  |
| Hspa5     | P20029 | 14828  | Tubb2c  | P68372    | 227613 |
| Hspa8     | P63017 | 15481  | Tubb2c  | P68372    | 227613 |
| Hspb1     | P14602 | 15507  | Tubb2c  | P68372    | 227613 |
| Hspb2     | Q99PR8 | 69253  | Tubb2c  | P68372    | 227613 |
| Hspb6     | Q5EBG6 | 243912 | Tubb2c  | P68372    | 227613 |
| Hspg2     | Q05793 | 15530  | Tubb2c  | P68372    | 227613 |
| Huwe1     | Q7TMY8 | 59026  | Tubb2c  | P68372    | 227613 |
| ldh1      | O88844 | 15926  | Tubb2c  | P68372    | 227613 |
| ldh1      | O88844 | 15926  | Tubb2c  | P68372    | 227613 |
| Igbp1     | Q61249 | 18518  | Tubb2c  | P68372    | 227613 |
| Igh-2     | Q91Z07 | 238447 | Tubb5   | P99024    | 22154  |
| Igh-6     | P01872 | NA     | Tut1    | Q8R3F9    | 70044  |
| Ighg1     | P01868 | 16017  | Twf1    | Q91YR1    | 19230  |
| Ighg2a    | P01863 | 380793 | Txn1    | P10639    | 22166  |
| Igtp      | Q3U5T3 | NA     | Txndc17 | Q9CQM5    | 52700  |
| Il17ra    | Q60943 | 16172  | Txn1l   | Q8CDN6    | 53382  |
| Il17rd    | Q8JZL1 | 171463 | Uba1    | Q02053    | 22201  |
| Ilf3      | Q9Z1X4 | 16201  | Uba2    | Q9Z1F9    | 50995  |
| Impa1     | O55023 | 55980  | Uba3    | Q8C878    | 22200  |
| Irf8      | P23611 | 15900  | Ubb     | P0CG49    | 22187  |
| Isoc1     | Q91V64 | 66307  | Ube2d3  | P61079    | 66105  |
| Itga10    | Q14BL5 | NA     | Ube2n   | P61089    | 93765  |
| Itgb2     | P11835 | 16414  | Ube2t   | Q9CQ37    | 67196  |
| Itih2     | Q61703 | 16425  | Ube2v1  | Q9CZY3    | 66589  |
| Itih4     | O54882 | NA     | Ubxn1   | Q922Y1    | 225896 |

|            |           |           |         |            |        |
|------------|-----------|-----------|---------|------------|--------|
| Itih4      | Q9DBK8    | NA        | Uchl1   | Q9R0P9     | 22223  |
| Itpa       | Q9D892    | 16434     | Uchl3   | Q9JKB1     | 50933  |
| Iyd        | Q9DCX8    | 70337     | Ugp2    | Q91ZJ5     | 216558 |
| Jak2       | Q62120    | NA        | Uimc1   | Q5U5Q9     | 20184  |
| Kars       | Q99MN1    | 85305     | Unc5c   | O08747     | 22253  |
| Kcns3      | Q8BQZ8    | 238076    | Unc5d   | Q8K1S2     | 210801 |
| Kdm5a      | Q3UXZ9    | 214899    | Upf2    | A2AT37     | NA     |
| Kif20b     | Q80WE4    | 240641    | Usp14   | Q9JMA1     | 59025  |
| Kif5a      | P33175    | 16572     | Usp5    | P56399     | 22225  |
| Klhl29     | Q80T74    | NA        | Utrn    | O08614     | NA     |
| Klhl5      | Q8BT10    | 71778     | Vars    | Q9Z1Q9     | 22321  |
| Klkb1      | P26262    | 16621     | Vat1    | Q62465     | 26949  |
| Klraq1     | Q3TDD9    | 73825     | Vcl     | Q64727     | 22330  |
| Kng1       | O08677    | 16644     | Vcp     | Q01853     | 269523 |
| Kpnb1      | P70168    | 16211     | Vim     | P20152     | 22352  |
| Krba1      | Q6NXZ1    | 77827     | Vim     | P20152     | 22352  |
| Krt1       | P04104    | 16678     | Vmn1r10 | Q9EQ42     | 113858 |
| Krt14      | Q61781    | 16664     | Vprbp   | Q80TR8     | 321006 |
| Krt16      | Q9Z2K1    | 16666     | Vps4a   | Q8VEJ9     | 116733 |
| Krt18      | P05784    | 16668     | Vps4b   | P46467     | 20479  |
| Krt19      | P19001    | 16669     | Vwa5a   | Q99KC8     | 67776  |
| Krt42      | Q6IFX2    | 68239     | Wdr1    | O88342     | 22388  |
| Krt6a      | P50446    | 16687     | Wdr16   | Q5F201     | 71860  |
| Krt6a      | P50446    | 16687     | Wdr17   | Q8C8Y2     | NA     |
| Krt79      | Q8VED5    | 223917    | Wdr43   | Q6ZQL4     | 72515  |
| Krt8       | P11679    | 16691     | Wdr49   | XP_143339  | 213248 |
| Krt82      | Q99M74    | 114566    | Wdr55   | Q9CX97     | 67936  |
| Krt84      | Q99M73    | 16680     | Wdr61   | Q9ERF3     | 66317  |
| Ksr2       | Q3UVC0    | NA        | Whrn    | Q80VW5     | 73750  |
| Lamb2      | Q61292    | 16779     | Whsc1   | Q8BVE8     | 107823 |
| Lcp1       | Q61233    | 18826     | Wnk3-ps | XP_0014813 | 279561 |
| Ldb3       | Q9JKS4    | 24131     | Wscd1   | Q80XH4     | 216881 |
| Ldha       | P06151    | 16828     | Xirp2   | Q4U4S6     | 241431 |
| Ldhb       | P16125    | 16832     | Xpnpep1 | Q6P1B1     | NA     |
| Ldhc       | P00342    | 16833     | Ywhab   | Q9CQV8     | 54401  |
| Ldhc       | P00342    | 16833     | Ywhae   | P62259     | 22627  |
| Lgals1     | P16045    | 16852     | Ywhae   | P62259     | 22627  |
| Lgals3     | P16110    | 16854     | Ywhag   | P61982     | 22628  |
| Lig4       | Q8BTF7    | 319583    | Ywhag   | P61982     | 22628  |
| Lingo2     | Q3URE9    | 242384    | Ywhah   | P68510     | 22629  |
| Llgl1      | Q80Y17    | 16897     | Zadh2   | Q8BGC4     | 225791 |
| Lmna       | P48678    | 16905     | Zbtb12  | Q6P6L4     | NA     |
| Lnx1       | O70263    | 16924     | Zc3hc1  | Q80YV2     | 232679 |
| LOC1000448 | P35550    | 100044829 | Zfp111  | Q99K53     | NA     |
| LOC1005032 | P61957    | 100503227 | Zfp161  | Q08376     | 22666  |
| LOC631286  | Q9D358    | 631286    | Zfp606  | Q3UTP2     | NA     |
| LOC676177  | XP_993019 | 676177    | Zfp608  | Q56A10     | 269023 |
| Lrg1       | Q91XL1    | 76905     | Zfp646  | Q6NV66     | NA     |
| Lrp1       | Q91ZX7    | 16971     | Zfp667  | Q2TL60     | 384763 |
| Lrrc9      | Q8CDN9    | 78257     | Zfp777  | OTTMUSP00  | 72306  |
| Lta4h      | P24527    | 16993     | Zfp937  | A2ANU7     | NA     |

|        |        |        |         |        |        |
|--------|--------|--------|---------|--------|--------|
| Lum    | P51885 | 17022  | Zfyve26 | Q5DU37 | 211978 |
| Luzp1  | Q8R4U7 | 269593 | Zscan5b | B2RTN3 | NA     |
| Lypla1 | P97823 | 18777  | Zxdc    | Q8C8V1 | 80292  |
| Lypla2 | Q9WTL7 | 26394  |         |        |        |
| Mageh1 | Q9NWG9 | 75625  |         |        |        |
